# Supplementary material
Source: publisher figshare collection journal article supplement (https://geolsoc.figshare.com/ndownloader/files/25508734)
Supplement: Supplementary file 1 [file 25508734]

## Sheet: Sheet1
Analysis Name	[U] (ppm)	U/Th	207Pb/235U	2 sigma	238U/206Pb	2 sigma	Rho	207Pb/206Pb	2 sigma	207Pb/235U Age (Ma)	2 -sigma	2 +sigma	206Pb/238U Age (Ma)	2 -sigma	2 +sigma	207Pb/206Pb Age (Ma)	2 -sigma	2 +sigma	Preferred Age (Ma)	2 -sigma	2 +sigma	Discordance
16051801 (329-1) targeted, Glen Pebbly Arkose Formation
3291A_1	108.478	1.5143	2.47018	0.309861	4.75988	0.157803	0.297003	0.0860577	0.00622926	1263.35	92.7523	88.7004	1229.3	42.796	42.6546	1339.48	143.205	136.77	1250.86	45.2823	45.1224	8.22588
3291A_2	210.165	2.71071	1.8889	0.290929	5.4437	0.210325	0.197115	0.0683356	0.00679753	1077.19	104.919	99.7638	1087.15	43.2373	43.0927	878.751	212.918	199.328	1066.63	45.8	45.6379	-23.7152
3291A_3	82.7467	2.99012	3.08128	0.515837	4.09447	0.247562	0.183607	0.0822308	0.00821747	1428.04	132.57	124.443	1408.66	80.3761	79.8782	1251.02	202.08	189.552	1408.14	80.3653	79.8661	-12.6009
3291A_4	635.294	2.66865	11.966	0.990113	2.13451	0.079693	0.507904	0.18473	0.00925368	2601.74	79.056	76.0936	2476.94	87.8671	87.273	2695.8	83.9599	81.5661	2678.36	85.2377	82.7729	8.11862
3291A_5	124.564	2.72783	1.65054	0.261271	5.9085	0.465424	0.527763	0.0736975	0.00748175	989.759	102.64	97.7009	1007.96	75.7967	75.3524	1033.19	212.231	198.612	1006.26	75.6951	75.252	2.44194
3291A_6	271.914	1.60608	1.71718	0.209197	5.95874	0.254412	0.340425	0.0719863	0.00427549	1014.97	79.7191	76.7075	1000.09	43.4829	43.3353	985.553	123.297	118.587	996.722	43.8055	43.6558	-1.47536
3291A_7	64.7498	0.605158	1.68831	0.374352	5.89486	0.21807	0.0777181	0.0648289	0.00993414	1004.13	146.557	136.689	1010.12	38.7644	38.6494	768.788	340.409	307.137	1008.82	38.7485	38.6337	-31.3918
3291A_8	39.1749	0.914038	1.48038	0.440541	6.45641	0.43565	0.0850898	0.0773497	0.00998642	922.387	188.858	172.779	928.288	60.5586	60.2768	1130.22	268.47	246.929	931.029	64.1272	63.8098	17.8667
3291A_9	120.618	2.16933	1.6182	0.2394	6.18368	0.294627	0.194275	0.0714214	0.00766915	977.293	95.0329	90.7837	966.306	46.039	45.8738	969.5	227.178	211.695	969.386	46.3407	46.1748	0.329428
3291A_10	45.1258	1.43965	1.59017	0.342814	5.5101	0.271228	0.0872906	0.0681292	0.00970262	966.363	139.041	130.128	1075.08	52.1108	51.9012	872.487	309.808	281.849	1072.4	52.0241	51.8151	-23.2203
3291A_11	121.668	1.88846	1.73447	0.325248	6.07794	0.430291	0.108128	0.0697978	0.010554	1021.41	124.514	117.319	981.898	66.8851	66.5386	922.409	327.325	296.19	978.714	66.7098	66.3665	-6.44931
3291A_12	139.954	2.85478	1.80097	0.214603	5.43949	0.200379	0.214788	0.0699506	0.00531177	1045.81	79.3253	76.3428	1087.92	41.5154	41.3807	926.902	159.991	152.173	1086.77	43.9798	43.8304	-17.372
3291A_13	234.921	0.827253	0.579518	0.0747139	14.7233	0.973469	0.287656	0.0609492	0.006654	464.152	48.6063	47.4701	423.611	28.1627	28.1013	637.442	244.031	226.581	418.499	28.8664	28.8019	33.5452
3291A_14	101.935	1.09363	4.17538	0.581859	3.3865	0.128336	0.136477	0.104	0.0100629	1669.2	117.492	111.065	1667.91	62.4648	62.1646	1696.69	183.852	173.195	1723.48	184.708	173.941	1.69653
3291A_15	52.3517	1.90349	2.89917	0.517558	4.45796	0.246722	0.190579	0.0901526	0.00841973	1381.7	139.458	130.494	1304.65	69.0758	68.7087	1428.76	183.739	173.23	1300.13	68.9046	68.5394	8.68681
3291A_16	340.996	4.9862	3.26426	0.319074	4.18811	0.0982771	0.37004	0.0956951	0.00475425	1472.58	77.434	74.5895	1380.31	37.9718	37.8601	1541.79	94.8895	91.9914	1383.58	39.1426	39.023	10.4739
3291A_17	310.508	1.13133	3.36299	0.329444	4.01793	0.127185	0.220372	0.0907588	0.00529723	1495.82	78.1553	75.2583	1432.72	47.88	47.7029	1441.55	113.318	109.229	1432.04	47.9074	47.7299	0.612398
3291A_18	59.1658	1.71286	1.95773	0.362165	5.53756	0.259263	0.112368	0.0726745	0.00959448	1101.1	128.3	120.673	1070.17	49.6727	49.4819	1004.89	280.164	256.938	1067.57	49.5999	49.4085	-6.49634
3291A_19	36.8293	1.1555	2.36788	0.491123	5.80829	0.355019	0.0617571	0.084455	0.0125409	1232.96	153.744	142.919	1024.04	60.4829	60.2007	1303.06	302.975	275.583	1022.25	60.4116	60.1285	21.4121
3291A_20	388.702	3.22954	1.86675	0.181085	5.84664	0.157071	0.309915	0.0719636	0.00419077	1069.38	65.1738	63.1469	1017.83	31.1969	31.1229	984.91	120.858	116.328	1019.43	31.2628	31.1859	-3.34243
3291A_21	117.228	0.980469	0.914375	0.184212	10.2416	0.375866	0.0923387	0.0721622	0.0110516	659.381	100.135	95.4286	600.569	23.5523	23.5107	990.518	328.176	296.774	616.954	25.8896	25.8376	39.3681
3291A_22	166.515	2.32635	1.92582	0.305146	5.61744	0.19283	0.176894	0.0761348	0.00636428	1090.09	108.759	103.23	1056.13	38.1978	38.0836	1098.62	171.959	162.876	1057.74	38.2655	38.1535	3.86696
3291A_23	79.0708	2.37113	2.24747	0.38286	5.08148	0.280181	0.296359	0.0741123	0.00731231	1195.99	123.382	116.313	1158.07	61.78	61.4855	1044.53	205.702	192.875	1153.84	62.8499	62.5463	-10.8702
3291A_24	82.4727	1.26715	4.43993	0.921835	3.58189	0.135233	0.20946	0.105594	0.00929345	1719.82	179.793	165.162	1587.24	59.425	59.1537	1724.69	166.16	157.396	1684.61	174.755	165.105	7.96922
3291A_25	49.1007	1.37061	2.0374	0.472832	5.57046	0.318629	0.129592	0.083816	0.0108394	1128.09	164.555	152.215	1064.34	59.0095	58.7407	1288.29	262.703	241.877	1062.52	59.9585	59.6824	17.3831
3291A_26	65.0597	2.78904	2.58402	0.450625	4.63076	0.212164	0.292108	0.0842052	0.00705982	1296.12	131.856	123.814	1260.42	56.6295	56.382	1297.3	167.504	158.785	1259.81	56.6325	56.3835	2.84244
3291A_27	503.451	0.653282	4.09682	0.405036	3.47734	0.208405	0.341765	0.0999532	0.00710771	1653.67	82.3377	79.129	1629.41	91.2236	90.5829	1623.21	135.29	129.451	1606.53	135.869	129.986	-0.381527
3291A_28	25.574	1.44112	1.82815	0.67335	5.26701	0.350515	0.10061	0.0768297	0.01618	1055.61	257.396	228.411	1120.62	71.0466	70.657	1116.77	451.669	393.867	1126.38	72.5623	72.1561	-0.344744
3291A_29	74.2907	0.697615	1.88338	0.341736	5.2365	0.368691	0.213154	0.0745059	0.00865243	1075.25	124.056	116.912	1126.61	75.4476	75.0099	1055.2	243.176	225.439	1121.26	77.8453	77.3792	-6.76722
3291A_30	54.7022	1.75607	2.17455	0.461035	5.41796	0.250923	0.117076	0.069514	0.00884293	1172.94	153.09	142.354	1091.9	50.0456	49.8522	914.033	273.405	251.35	1098.12	51.4886	51.2839	-19.4596
3291A_31	13.3362	0.936247	2.41835	1.08181	5.80593	0.592234	0.0834764	0.0798751	0.0293801	1248.07	349.811	298.316	1024.43	98.3767	97.6304	1193.9	827.183	651.043	1020.83	98.0723	97.332	14.195
3291A_32	153.482	6.05068	4.28445	0.621581	3.33391	0.126503	0.206016	0.101597	0.00720596	1690.38	123.09	116.054	1691.05	63.2205	62.912	1653.5	134.401	128.628	1642.32	134.783	128.981	-2.27075
3291A_33	466.533	0.542554	0.595819	0.0688867	13.7065	0.454024	0.219972	0.0568848	0.00436861	474.577	44.311	43.3648	453.951	16.6915	16.6685	487.071	174.137	165.148	450.699	17.3644	17.3396	6.79969
3291A_34	51.5775	1.073	5.01312	1.5042	3.30848	0.197392	0.186061	0.102825	0.0101368	1821.54	271.348	239.328	1702.47	93.7295	93.053	1675.73	187.937	176.826	1668.82	188.19	177.053	-1.59596
3291A_35	200.368	2.88676	3.33864	0.450953	3.88546	0.157501	0.262223	0.0922288	0.00775508	1490.14	108.379	102.887	1476.37	59.1775	58.9072	1472.1	163.936	155.502	1474.77	59.1566	58.8864	-0.289994
3291A_36	59.0057	1.08239	4.70441	1.05473	3.34087	0.147815	0.248053	0.107967	0.00848043	1768.02	196.994	179.564	1687.95	71.3438	70.9511	1765.38	147.082	140.16	1758.7	147.306	140.366	4.38613
3291A_37	34.8427	2.31153	1.90626	0.484511	6.39398	0.43853	0.0558826	0.0780109	0.0171438	1083.28	176.751	162.592	936.723	61.8881	61.5937	1147.15	470.682	408.15	934.814	61.7875	61.4929	18.3435
3291A_38	827.564	6.70316	1.63418	0.140478	5.83512	0.169176	0.395383	0.0701453	0.003734	983.471	54.8843	53.44	1019.69	32.9754	32.8927	932.61	111.191	107.357	1019.52	33.3526	33.2651	-9.33705
3291A_39	68.6724	1.88652	0.778829	0.194848	13.1151	0.712725	0.0548412	0.0662973	0.0150167	584.815	114.384	108.283	473.69	26.1127	26.06	815.775	512.976	440.766	475.252	27.085	27.0282	41.9338
3291A_40	89.1827	0.802373	0.682151	0.157449	12.8415	0.578339	0.129105	0.0577876	0.00987399	528.074	97.3357	92.8829	483.411	22.5761	22.5353	521.718	398.66	354.377	482.679	22.8844	22.8453	7.34247
3291A_41	119.722	2.32497	1.65553	0.213635	6.08912	0.223247	0.272638	0.0763823	0.00665896	991.667	83.3749	80.0865	980.227	37.2726	37.1638	1105.11	179.38	169.515	980.452	37.8512	37.7417	11.3004
3291A_42	60.894	2.84547	3.77066	0.68867	3.39573	0.206943	0.43963	0.107843	0.00941759	1586.52	152.135	141.527	1663.91	93.5799	92.9055	1763.28	164.027	155.465	1725.84	169.026	159.965	5.63545
3291A_43	230.817	0.826016	0.581954	0.0761821	14.8885	0.990526	0.297824	0.0608909	0.00668483	465.716	49.4961	48.3184	419.059	28.0036	27.9429	635.382	245.536	227.88	416.2	28.715	28.6526	34.0462
3291A_44	128.579	1.51144	2.93206	0.417792	4.146	0.307174	0.479447	0.0907778	0.00724832	1390.23	110.859	105.119	1392.91	96.001	95.2915	1441.95	156.102	148.447	1392.82	96.0112	95.3002	3.40034
3291A_45	19.9279	59.5971	6.02119	1.51869	3.04359	0.20757	0.249239	0.11673	0.0125199	1978.91	232.438	208.545	1831.4	112.736	111.758	1906.74	199.173	186.607	1832.53	217.794	202.905	3.95145
3291A_46	45.7077	0.809586	3.50901	0.824555	3.56055	0.200131	0.377281	0.0949674	0.00848253	1529.24	194.726	177.677	1595.67	83.6931	83.1532	1527.43	173.134	163.727	1509.67	173.779	164.312	-4.46771
3291A_47	24.2082	1.33696	2.88252	0.923398	4.12915	0.296976	0.149197	0.0911595	0.0147499	1377.35	257.103	228.18	1398.02	93.3646	92.6932	1449.94	324.763	293.269	1398.59	93.4111	92.7406	3.58043
3291A_48	437.365	1.66114	2.94551	0.25956	4.05595	0.154954	0.317076	0.0922058	0.00519315	1393.69	67.9213	65.7231	1420.66	54.5788	54.35	1471.63	108.826	105.044	1422.66	54.6633	54.4326	3.4631
3291A_49	90.6506	0.83794	2.20048	0.391589	5.39524	0.324683	0.379146	0.0799417	0.00793765	1181.19	128.198	120.584	1096.13	63.4933	63.1808	1195.55	202.388	189.859	1095.22	63.467	63.1549	8.31592
3291A_50	174.617	2.5634	2.1252	0.263056	5.47943	0.493739	0.355039	0.0795137	0.00820213	1157.03	87.3183	83.718	1080.62	91.8085	91.1605	1184.95	210.863	197.306	1081.67	91.8981	91.2477	8.80465
3291A_51	218.767	0.776055	1.87405	0.264178	5.99058	0.674327	0.723994	0.0774967	0.00690577	1071.96	95.5454	91.2513	995.167	105.622	104.764	1134	182.676	172.441	982.734	105.885	105.02	12.2428
3291A_52	965.946	0.916351	0.565186	0.0541159	13.5764	0.519084	0.262034	0.0563434	0.00417918	454.897	35.4137	34.8067	458.152	18.914	18.8877	465.926	168.652	160.218	455.058	19.0752	19.0455	1.66851
3291A_53	211.994	1.13638	1.49276	0.277123	6.79153	0.794314	0.545495	0.0709658	0.00958791	927.443	116.14	109.856	885.486	98.3171	97.5716	956.429	289.224	264.601	886.301	98.4058	97.6617	7.41748
3291A_54	31.7332	1.62187	2.11104	0.601201	5.68012	0.753571	0.189915	0.0786124	0.0158457	1152.42	206.359	187.31	1045.37	129.761	128.469	1162.39	427.885	375.546	1044.73	129.695	128.404	10.0672
3291A_55	280.943	4.24375	1.40336	0.165891	7.10375	0.696374	0.513296	0.0724198	0.00698682	890.356	71.3243	68.9041	849.019	79.576	79.0865	997.763	202.447	190.041	849.644	79.6361	79.1471	14.9078
3291A_56	101.095	1.67781	1.77722	0.303612	6.02832	0.709773	0.389621	0.0745327	0.00935124	1037.16	114.153	108.076	989.392	109.693	108.766	1055.93	263.544	242.837	989.559	109.715	108.79	6.30112
3291A_57	885.223	4.05479	2.73583	0.363628	4.45982	0.375946	0.551958	0.0911578	0.00875967	1338.25	101.318	96.5028	1304.16	102.491	101.683	1449.9	188.665	177.59	1327.07	109.857	108.929	10.0519
3291A_58	57.2113	0.688504	2.43094	0.557466	5.25216	0.634538	0.415853	0.0854444	0.0107644	1251.8	172.069	158.622	1123.53	126.513	125.282	1325.64	254.245	234.652	1137.15	129.972	128.674	15.2463
3291A_59	510.682	2.24759	4.34755	0.532783	3.37074	0.349386	0.639971	0.105112	0.00950224	1702.43	103.771	98.725	1674.78	156.384	154.51	1716.27	170.988	161.724	1690.49	171.885	162.538	2.41791
3291A_60	74.1812	1.21901	1.67239	0.432297	6.0161	0.606345	0.185905	0.071702	0.013528	998.093	171.277	157.948	991.254	94.3558	93.6702	977.495	410.331	362.404	989.611	94.2206	93.5356	-1.40756
3291A_61	46.3325	1.45112	4.13197	1.03063	3.53875	0.450482	0.402603	0.102428	0.0157547	1660.65	214.894	194.315	1604.37	183.841	181.256	1668.58	298.884	271.731	1645.71	299.963	272.651	3.84795
3291A_62	320.367	2.45741	2.34081	0.325605	4.6302	0.47236	0.399511	0.083749	0.00925455	1224.77	101.455	96.6265	1260.56	119.271	118.177	1286.73	223.094	207.895	1260.69	119.29	118.196	2.03337
3291A_63	286.06	1.49822	1.84348	0.257205	5.6802	0.697743	0.618644	0.0782912	0.00921978	1061.1	93.9877	89.8296	1045.36	120.418	119.305	1154.27	243.041	225.231	1045.58	120.446	119.333	9.43548
3291A_64	151.953	2.09308	1.55201	0.271161	6.26605	0.670585	0.350942	0.0709202	0.00928283	951.291	110.86	105.12	954.499	96.6318	95.9117	955.113	279.844	256.73	937.189	101.059	100.273	0.0643275
3291A_65	76.2163	1.69349	2.7048	0.513873	4.57739	0.3756	0.254212	0.093867	0.0117059	1329.77	145.961	136.169	1273.76	97.3947	96.6644	1505.44	245.298	226.85	1272.65	97.3313	96.6021	15.3896
3291A_66	471.713	10.7775	1.70257	0.216267	6.29152	0.621613	0.480364	0.0740491	0.00805822	1009.5	82.9241	79.6704	950.906	89.1749	88.5624	1042.81	227.734	212.116	952.573	89.3214	88.7081	8.81278
3291A_67	390.812	2.81023	3.31859	0.455864	3.9567	0.335752	0.395116	0.0943244	0.00974209	1485.43	110.114	104.449	1452.57	113.499	112.51	1514.62	201.466	188.848	1456.35	115.141	114.121	4.09681
3291A_68	568.186	1.56497	0.55933	0.0674461	15.1907	1.03276	0.343653	0.0616694	0.00668115	451.09	44.4006	43.4505	410.982	28.0446	27.9837	662.664	241.058	223.991	409.911	27.9827	27.9221	37.9803
3291A_69	256.254	1.56837	3.69766	0.49054	3.96186	0.395326	0.276038	0.0966363	0.0121978	1570.86	108.897	103.353	1450.88	132.507	131.159	1560.17	246.565	227.885	1441.04	134.473	133.084	7.00551
3291A_70	213.706	1.60135	1.96015	0.281546	5.57171	0.580666	0.554512	0.0793829	0.00858722	1101.93	98.9468	94.3492	1064.12	104.181	103.346	1181.7	221.612	206.688	1062.75	104.065	103.232	9.94967
3291A_71	413.199	155.72	1.49185	0.193954	6.60403	0.387427	0.253673	0.0731116	0.00736742	927.068	80.612	77.5339	908.933	52.1969	51.9866	1017.05	211.135	197.663	909.145	52.2154	52.0034	10.6302
3291A_72	267.483	1.17544	1.70667	0.220819	6.29843	0.33612	0.297412	0.0776161	0.00710051	1011.03	84.5751	81.1933	949.937	49.8813	49.6877	1137.06	187.604	176.823	950.621	49.9186	49.726	16.457
3291A_73	302.193	1.27177	3.86571	0.440575	3.84995	0.187428	0.414935	0.106888	0.00661609	1606.55	94.0859	89.9194	1488.53	69.3983	69.027	1747.02	115.562	111.249	1699.99	126.69	121.536	14.7959
3291A_74	965.941	0.916357	0.554311	0.0536221	14.0089	0.539004	0.274066	0.0567392	0.00419342	447.817	35.3352	34.7309	444.483	18.3322	18.3061	481.413	167.574	159.237	443.835	18.5667	18.54	7.67129
3291A_75	113.977	1.652	1.71939	0.259167	5.89098	0.407066	0.36442	0.0735982	0.00785178	1015.8	99.1513	94.5348	1010.74	66.8881	66.543	1030.47	223.519	208.466	1011.99	67.5803	67.2267	1.91485
3291A_76	464.707	0.539006	0.583155	0.0679775	14.1665	0.472215	0.230642	0.0572277	0.00438362	466.487	44.0733	43.1372	439.705	16.1233	16.1032	500.319	173.274	164.365	443.069	16.7485	16.7267	12.1151
3291A_77	275.574	2.30969	1.70057	0.210253	5.81035	0.348905	0.426896	0.0710621	0.00568239	1008.74	80.6328	77.5529	1023.71	59.5047	59.2327	959.2	167.855	159.255	1027.85	60.6512	60.3674	-6.72504
3291A_78	471.071	1.33745	0.563796	0.0630148	13.8751	0.715042	0.30552	0.0589061	0.00495702	453.994	41.3337	40.5092	448.625	23.6693	23.6259	563.629	188.79	178.221	448.722	24.0467	24.0033	20.4043
3291A_79	373.201	2.88829	2.73144	0.327946	4.283	0.256814	0.275566	0.0865062	0.00780281	1337.05	91.2593	87.3338	1352.72	76.7664	76.3118	1349.52	179.249	169.273	1353.95	78.184	77.7129	-0.237196
3291A_80	10.5579	1.44921	1.47574	0.779461	6.47698	0.868105	0.0997266	0.0682185	0.0244978	920.485	347.842	296.884	925.542	116.935	115.883	875.199	848.074	666.535	920.494	118.436	117.358	-5.75207
3291A_81	136.787	1.07313	4.55383	0.853414	3.3859	0.213617	0.354459	0.113432	0.0106194	1740.86	162.346	150.323	1668.17	96.6614	95.9423	1855.12	174.192	164.527	1836.47	174.814	165.09	10.0773
3291A_82	55.9241	1.26709	2.52527	0.41605	4.45327	0.381702	0.128439	0.0809324	0.0107239	1279.34	123.516	116.433	1305.89	103.716	102.887	1219.8	272.178	249.961	1305.74	103.707	102.879	-7.0577
3291A_83	215.213	2.2872	1.72459	0.206692	6.36568	0.369963	0.317938	0.0740896	0.00631177	1017.74	78.5276	75.6038	940.598	53.2277	53.0089	1043.91	176.81	167.25	948.877	56.7736	56.5248	9.89656
3291A_84	469.415	0.985171	5.78829	0.636163	2.93272	0.214787	0.307304	0.125009	0.0113463	1944.66	97.458	92.9943	1891.38	124.385	123.195	2028.92	165.243	156.454	2011.57	168.827	159.67	6.77887
3291A_85	1210.45	3.13307	1.60438	0.159155	6.09275	0.516513	0.65564	0.0742047	0.00560747	971.919	63.0184	61.1214	979.685	79.0915	78.6093	1047.04	156.25	148.736	978.924	81.9695	81.4517	6.43301
3291A_86	184.323	2.14631	3.70683	0.542942	3.96774	0.214985	0.227217	0.101302	0.0091333	1572.84	120.64	113.873	1448.95	74.145	73.7211	1648.11	172.027	162.684	1455.05	75.1219	74.6867	12.0838
3291A_87	471.077	1.33737	0.5767	0.0639883	13.4046	0.686475	0.297105	0.0585634	0.00493491	462.338	41.6318	40.7954	463.819	24.4088	24.3626	550.904	189.471	178.837	460.496	24.6393	24.5923	15.8077
3291A_88	138.797	1.66264	1.61026	0.247071	5.7812	0.444494	0.33032	0.071957	0.0088379	974.208	98.4588	93.9051	1028.48	75.123	74.6876	984.724	260.629	240.435	1025.94	74.9534	74.5215	-4.4433
3291A_89	168.109	0.823619	1.46257	0.245145	6.14557	0.526841	0.221001	0.0649045	0.0101827	915.067	103.682	98.6449	971.869	79.1492	78.6663	771.243	348.84	313.978	970.631	79.0527	78.571	-26.0132
3291A_90	556.524	2.68746	3.80224	0.498121	3.68857	0.303239	0.341318	0.102088	0.0107004	1593.22	108.152	102.682	1546.42	116.287	115.247	1662.42	200.571	187.974	1643.28	204.292	191.25	6.97754
3291A_91	112.834	0.938754	3.99295	0.572564	3.48727	0.247751	0.343537	0.0999838	0.00908925	1632.76	119.91	113.223	1625.3	105.502	104.647	1623.78	174.05	164.503	1630.18	182.214	171.774	-0.0936086
3291A_92	93.9351	0.99539	1.99197	0.328923	6.35328	0.578445	0.370221	0.0846878	0.0117517	1112.79	114.812	108.667	942.306	81.441	80.9285	1308.4	281.968	258.088	936.973	81.0178	80.5119	27.9802
3291A_93	85.3935	1.51428	1.65721	0.310948	5.72919	0.56468	0.28797	0.0732357	0.00930538	992.312	122.438	115.474	1037.1	96.1496	95.4393	1020.48	268.516	247.091	1034.24	97.3689	96.638	-1.62864
3291A_94	232.774	1.6281	3.36838	0.48538	3.7569	0.304405	0.486639	0.101567	0.00936691	1497.07	116.076	109.799	1521.37	112.857	111.876	1652.94	175.974	166.207	1632.7	176.684	166.849	7.96005
3291A_95	568.186	1.56497	0.568313	0.0677618	14.7812	0.998603	0.339099	0.0612908	0.00662591	456.923	44.3523	43.4044	422.002	28.6689	28.6053	649.454	241.061	224.006	418.285	28.4415	28.3775	35.022
3291A_96	242.827	1.00968	1.62847	0.248617	6.93101	0.658055	0.470858	0.0735801	0.00831247	981.269	98.3863	93.8392	868.814	78.6771	78.1987	1029.97	237.226	220.339	881.44	82.1595	81.6391	15.6469
3291A_97	31.5499	1.716	2.09153	0.712663	5.79372	0.589534	0.205513	0.0797227	0.0131802	1146.03	248.691	221.532	1026.42	98.144	97.4039	1190.14	345.014	310.121	1024.05	97.9372	97.199	13.7559
3291A_98	150.266	1.89243	12.0107	2.21427	2.23033	0.241317	0.637681	0.18715	0.0174514	2605.24	180.604	165.846	2387.97	220.609	216.898	2717.28	157.996	149.718	2690.34	162.981	154.196	12.119
3291A_99	258.197	1.84794	1.49657	0.190883	6.60821	0.725451	0.562924	0.0756965	0.00836523	928.993	79.1571	76.1871	908.396	94.4956	93.8095	1087.06	229.833	213.899	905.971	94.265	93.5808	16.4352
3291A_100	137.873	1.18392	3.94427	0.579381	3.42663	0.266427	0.44204	0.103277	0.00919405	1622.81	122.613	115.63	1650.68	116.501	115.457	1683.83	169.011	159.968	1659.86	169.835	160.717	1.96902
3291A_101	525.328	2.88482	1.74475	0.184591	6.14133	0.386069	0.491592	0.0772791	0.00589303	1025.22	69.4614	67.1641	972.492	59.0536	58.7844	1128.4	155.78	148.277	978.113	61.422	61.1308	13.8167
3291A_102	84.5656	1.71426	1.68392	0.278041	6.12251	0.438623	0.210994	0.0781485	0.00849598	1002.47	108.011	102.555	975.266	66.7297	66.3861	1150.65	223.798	208.612	970.645	66.4534	66.1126	15.2423
3291A_103	255.808	1.91296	4.337	0.493165	3.32629	0.106058	0.227622	0.105313	0.00670214	1700.42	96.0632	91.7234	1694.46	54.304	54.0752	1719.79	119.291	114.708	1706.73	119.713	115.1	1.47326
3291A_104	245.37	1.44272	3.05474	0.332249	4.04088	0.177105	0.304372	0.0930319	0.00605172	1421.42	84.954	81.5426	1425.42	60.4243	60.1412	1488.54	125.758	120.73	1426.2	60.4516	60.1694	4.24034
3291A_105	253.583	0.814938	1.61315	0.185504	5.93224	0.315307	0.276497	0.0734732	0.00573381	975.333	73.391	70.8308	1004.23	52.0528	51.8434	1027.03	161.993	153.94	1004.45	52.6994	52.4835	2.22028
3291A_106	172.964	0.528059	3.00487	0.384637	4.23605	0.461224	0.417995	0.0972486	0.0117536	1408.85	99.9393	95.2506	1366.23	136.432	135.004	1572.01	235.296	218.216	1371.23	139.26	137.773	13.0905
3291A_107	37.1561	3.54198	2.15261	0.539033	5.45789	0.431863	0.179091	0.0871244	0.014829	1165.89	181.483	166.587	1084.55	80.858	80.3542	1363.25	346.856	311.311	1083.26	80.7763	80.2731	20.4438
3291A_108	269.442	1.57542	1.44696	0.238467	5.94604	0.511574	0.353724	0.0703758	0.0100195	908.613	101.445	96.6182	1002.07	81.6695	81.1541	939.338	306.394	278.923	996.103	82.8415	82.3125	-6.67849
3291A_109	46.4431	1.34271	2.19697	0.451413	5.05832	0.256883	0.20772	0.0863489	0.00854518	1180.08	148.685	138.538	1162.92	56.8667	56.6185	1346	197.333	185.312	1163.33	56.8903	56.6405	13.602
3291A_110	139.171	1.86106	2.00841	0.309895	5.436	0.270081	0.159756	0.0767488	0.0100243	1118.36	107.384	101.99	1088.57	52.6235	52.4097	1114.67	272.382	250.252	1089.55	52.669	52.4546	2.34204
16051801 (329-1) random, Glen Pebbly Arkose Formation
3291A_57	104.886	1.21872	0.630266	0.0626809	13.7058	0.712275	0.484027	0.0589056	0.00439622	496.262	39.4199	38.6692	453.976	24.8465	24.7987	563.61	166.866	158.556	446.464	27.8948	27.8345	19.4521
3291A_50	222.428	2.19416	0.575395	0.0539298	13.5999	0.434959	0.247534	0.0560361	0.00456629	461.498	35.0601	34.465	457.389	17.2675	17.2444	453.8	186.171	175.954	446.762	17.0117	16.9879	-0.790788
3291A_62	73.272	3.91577	0.596699	0.0761365	13.4098	0.389794	0.181897	0.0544288	0.00533698	475.137	49.0038	47.8489	463.644	16.5132	16.4935	388.835	227.996	212.918	453.901	17.1206	17.0978	-19.2394
3291A_29	49.196	2.55446	0.538485	0.0956455	13.0474	1.43261	0.323823	0.0555496	0.00904514	437.425	64.127	62.1638	476.056	51.5168	51.3118	434.41	384.721	343.529	463.273	54.0164	53.7925	-9.5868
3291A_23	40.6043	4.10636	1.48927	0.204078	6.91412	0.644031	0.410949	0.0753723	0.00821248	926.018	84.9988	81.5833	870.799	78.2652	77.7942	1078.45	226.784	211.263	883.294	82.6077	82.0806	19.2544
3291A_68	60.2771	3.03241	1.40859	0.147796	6.60354	0.25725	0.302606	0.066983	0.00489174	892.565	63.2817	61.3691	908.996	38.3687	38.2549	837.246	155.925	148.528	885.107	41.7476	41.6128	-8.56986
3291A_56	65.4247	3.38361	1.46958	0.169475	6.30337	0.256761	0.138716	0.0668417	0.00594703	917.954	70.9041	68.5118	949.244	41.1141	40.9834	832.846	191.154	180.156	905.167	43.4334	43.2876	-13.9759
3291A_38	161.237	0.981925	1.60941	0.176113	6.55924	0.500601	0.252197	0.0733854	0.00776581	973.877	69.7127	67.3987	914.72	68.0247	67.6676	1024.62	221.848	207.016	910.521	67.7229	67.3705	10.7255
3291A_69	267.609	3.37756	1.4578	0.107422	6.45517	0.349953	0.375855	0.0721161	0.00489862	913.102	44.8709	43.9006	928.453	50.9873	50.7864	989.218	141.341	135.184	921.904	51.316	51.1127	6.14269
3291A_43	109.201	0.962749	1.68867	0.184266	6.55597	0.381248	0.28607	0.085288	0.00756244	1004.26	70.8088	68.4228	915.146	53.3263	53.1052	1322.1	176.807	167.108	928.298	59.5812	59.3083	30.7806
3291A_25	36.9692	2.76052	1.51243	0.217616	6.41787	0.369113	0.356543	0.0747901	0.00722709	935.421	89.9096	86.0973	933.477	53.7193	53.4964	1062.87	200.756	188.508	933.558	54.5479	54.318	12.1737
3291A_97	38.5561	0.949263	1.78406	0.226321	6.31759	0.198319	0.169746	0.0745542	0.00581789	1039.66	84.2663	80.9089	947.258	34.1588	34.0685	1056.51	161.255	153.26	934.904	35.932	35.8322	10.3408
3291A_110	94.6186	2.39122	1.68866	0.154783	6.29021	0.203272	0.210734	0.0720592	0.0043941	1004.26	59.312	57.6288	951.089	34.9628	34.8697	987.614	126.618	121.654	936.85	34.5898	34.4986	3.69826
3291A_84	56.7367	1.56324	1.7477	0.204391	6.26217	0.423081	0.408494	0.0738969	0.00627357	1026.31	76.9712	74.1601	955.049	63.418	63.1075	1038.65	176.323	166.817	950.68	63.0812	62.7728	8.04923
3291A_2	93.6343	2.33873	1.53624	0.159273	6.06959	0.237156	0.228797	0.0713959	0.00568836	944.997	64.7876	62.7845	983.153	41.0224	40.8924	968.771	166.979	158.463	977.145	43.6819	43.5343	-1.48458
3291A_41	167.102	5.38868	1.77126	0.170464	5.97446	0.334435	0.400094	0.0715155	0.00494606	1034.98	63.4382	61.5163	997.654	55.9216	55.6801	972.186	144.35	137.94	985.331	56.1534	55.9098	-2.61973
3291A_53	26.3407	2.1974	1.61924	0.229628	5.95621	0.184937	0.149822	0.0664259	0.00683095	977.698	91.0283	87.1225	1000.49	35.5401	35.4425	819.826	222.485	207.737	988.53	38.1475	38.035	-22.0365
3291A_98	183.359	2.36819	1.64199	0.12312	5.92539	0.111586	0.158938	0.0687206	0.00357102	986.479	47.878	46.7749	1005.3	27.4657	27.4074	890.364	109.221	105.528	994.842	28.9519	28.8857	-12.9095
3291A_35	78.3899	4.19955	1.45953	0.161596	6.03222	0.400681	0.416766	0.0745153	0.00660797	913.813	67.8333	65.6405	988.799	64.4135	64.0934	1055.46	183.944	173.613	1003.46	66.6916	66.3485	6.31551
3291A_64	77.8344	3.73327	1.75602	0.171124	5.89355	0.174446	0.314733	0.0716203	0.00476908	1029.38	64.0452	62.0872	1010.33	34.9733	34.8787	975.169	138.796	132.859	1005.49	36.6584	36.5558	-3.60568
3291A_52	20.1978	1.13463	1.8196	0.323819	5.70844	0.187939	0.185703	0.0738175	0.00679935	1052.54	120.094	113.388	1040.58	38.3401	38.2263	1036.48	191.842	180.643	1009.17	45.2704	45.1133	-0.395762
3291A_76	217.901	4.28842	1.70922	0.149512	5.74777	0.196449	0.274708	0.0699105	0.00447114	1011.99	56.8232	55.2761	1034.01	39.3234	39.2024	925.724	134.222	128.677	1010.37	40.7861	40.6575	-11.697
3291A_21	11.9278	1.28213	1.97108	0.435994	5.91995	0.600066	0.324348	0.0691575	0.0106803	1105.68	154.753	143.791	1006.16	97.0751	96.3496	903.442	335.718	303.077	1011.83	105.343	104.489	-11.3695
3291A_9	53.0912	2.46022	1.91938	0.226756	5.90167	0.120439	0.16058	0.0748843	0.00541336	1087.85	80.4398	77.3747	1009.04	28.4416	28.3789	1065.4	148.889	142.044	1012.94	31.7051	31.6261	5.28947
3291A_20	79.8339	3.97405	1.57505	0.186135	5.81194	0.357996	0.248441	0.0714203	0.00715365	960.421	74.755	72.1005	1023.45	62.1949	61.8975	969.468	211.382	197.914	1024.53	62.1792	61.8793	-5.56814
3291A_107	104.401	5.65532	1.65961	0.159213	5.78825	0.0932411	0.162177	0.0725221	0.00432445	993.226	61.7124	59.8923	1027.32	26.4449	26.3919	1000.63	123.51	118.779	1028.48	27.0244	26.9664	-2.66762
3291A_92	189.633	3.71602	1.7139	0.18395	5.72775	0.261139	0.348572	0.0729597	0.00568305	1013.75	70.0166	67.6828	1037.35	48.872	48.686	1012.83	162.036	153.984	1029.07	48.4851	48.3034	-2.42014
3291A_82	332.532	4.82516	1.64722	0.156742	5.73335	0.313883	0.309559	0.0716558	0.0054214	988.488	61.0287	59.248	1036.41	56.8922	56.6436	976.181	158.165	150.5	1030.24	56.5047	56.2595	-6.16962
3291A_55	192.554	2.94156	1.73791	0.168072	5.62001	0.223157	0.378192	0.0737356	0.00466972	1022.69	63.308	61.3939	1055.69	44.4717	44.3202	1034.24	130.663	125.371	1037.58	44.6929	44.5371	-2.0735
3291A_81	205.536	3.90378	1.61678	0.127585	5.52636	0.24519	0.394592	0.0683902	0.00409872	976.741	50.1198	48.9127	1072.17	49.3736	49.1841	880.402	126.509	121.583	1041.4	52.6222	52.4094	-21.7815
3291A_104	33.2936	2.30613	1.75369	0.253632	5.62432	0.151462	0.0663299	0.072161	0.00736083	1028.53	95.7452	91.4336	1054.94	34.3	34.2102	990.484	214.702	200.805	1046.95	35.3395	35.2443	-6.50757
3291A_30	35.8941	26.3523	1.97543	0.284139	5.64351	0.67887	0.401221	0.0723014	0.0101131	1107.16	99.3558	94.7205	1051.63	119.259	118.167	994.437	298.141	271.991	1049.35	123.572	122.4	-5.75141
3291A_58	97.6419	3.23759	1.74693	0.181644	5.51719	0.177433	0.264191	0.0700284	0.00509959	1026.03	68.2786	66.0573	1073.81	38.9113	38.7929	929.187	153.21	146.025	1049.43	38.4052	38.2898	-15.5644
3291A_106	144.665	2.92583	1.85357	0.167088	5.63037	0.0975354	0.111316	0.0737008	0.00474072	1064.7	60.3426	58.601	1053.89	27.7706	27.7111	1033.29	132.776	127.315	1050.9	27.6672	27.6078	-1.99432
3291A_51	107.55	3.35487	1.9151	0.181572	5.4907	0.163511	0.263626	0.0727779	0.00543818	1086.36	64.2507	62.2802	1078.58	37.0908	36.9856	1007.77	155.395	147.977	1057.23	37.2101	37.1016	-7.02587
3291A_90	450.446	9.16348	1.81972	0.168623	5.4699	0.240749	0.288152	0.0712975	0.00475189	1052.58	61.6476	59.8314	1082.35	49.4078	49.2191	965.956	139.124	133.162	1062.04	49.895	49.7041	-12.05
3291A_26	18.7129	1.5758	1.88026	0.480888	5.54117	0.526694	0.322721	0.0622337	0.0104884	1074.15	177.024	162.823	1069.53	96.572	95.8552	682.148	382.047	340.822	1068.47	100.802	100.021	-56.7881
3291A_8	41.1255	2.13341	1.83743	0.247051	5.52099	0.114397	0.109458	0.0768801	0.00643043	1058.94	90.3896	86.5377	1073.13	30.2493	30.1797	1118.08	171.56	162.509	1068.96	30.5887	30.5148	4.02046
3291A_4	42.2725	2.04517	1.82206	0.273546	5.66483	0.189788	0.142023	0.0701682	0.00628947	1053.43	100.887	96.1115	1047.98	38.9498	38.8325	933.28	189.553	178.673	1069.29	42.3007	42.1609	-12.2898
3291A_83	133.33	4.07475	1.89487	0.211341	5.47384	0.404699	0.437905	0.0779371	0.00766568	1079.29	75.5155	72.8073	1081.64	77.252	76.7917	1145.27	201.924	189.483	1075.83	78.3869	77.9144	5.55598
3291A_3	71.1839	2.54619	2.24609	0.231981	5.45676	0.183852	0.306597	0.0794066	0.00563569	1195.57	73.8922	71.2978	1084.75	40.3343	40.2074	1182.29	143.574	137.158	1088.09	40.3383	40.2137	8.24976
3291A_32	59.0699	4.29921	1.82569	0.319229	5.2989	0.512777	0.447682	0.0682337	0.00875334	1054.73	118.079	111.589	1114.43	102.036	101.236	875.66	277.526	254.875	1102.25	101.044	100.26	-27.2672
3291A_42	50.6574	3.24141	1.83539	0.196918	5.27853	0.368141	0.328588	0.0732156	0.00754667	1058.21	71.7719	69.3215	1118.38	75.4859	75.045	1019.93	216.04	201.953	1105.12	74.7116	74.2801	-9.65265
3291A_7	51.9077	2.37114	2.03997	0.220637	5.24673	0.182196	0.125334	0.07422	0.005223	1128.95	75.0654	72.3892	1124.6	42.6936	42.5529	1047.46	145.242	138.727	1120.63	43.8087	43.6604	-7.36441
3291A_39	70.4427	5.0107	1.9514	0.214197	5.16482	0.311947	0.347138	0.0753153	0.00662719	1098.93	75.0613	72.3854	1140.94	67.5808	67.2282	1076.93	181.879	171.761	1124.14	68.9646	68.5976	-5.94413
3291A_6	136.499	2.20173	2.07715	0.180825	5.19915	0.0885248	0.175251	0.0764512	0.00403422	1141.3	60.5618	58.8078	1134.03	29.2009	29.1362	1106.91	107.299	103.69	1134.13	30.8051	30.7318	-2.45043
3291A_108	386.534	3.06814	2.06369	0.155106	5.17588	0.068472	0.174724	0.0764381	0.00362595	1136.84	52.0679	50.7662	1138.71	27.4524	27.3929	1106.57	96.2909	93.3744	1134.35	27.3341	27.2764	-2.90439
3291A_105	68.6447	3.45892	2.0208	0.223296	5.16073	0.095223	0.153663	0.076184	0.00493617	1122.53	76.4789	73.7029	1141.77	30.615	30.5426	1099.91	132.418	126.966	1142.43	31.1269	31.0517	-3.80586
3291A_103	320.009	5.05111	2.02662	0.160027	5.07413	0.0820388	0.210947	0.0751349	0.00371033	1124.48	54.4088	52.9892	1159.61	29.5896	29.5218	1072.11	100.827	97.6399	1156.37	29.6599	29.5917	-8.16081
3291A_86	64.4542	3.25051	2.42381	0.328164	4.98353	0.440086	0.504095	0.0803338	0.0078766	1249.69	99.7315	95.062	1178.87	98.5929	97.8459	1205.19	199.483	187.294	1167.51	97.7287	96.9934	2.1843
3291A_37	82.3768	4.65587	1.91496	0.252791	4.94537	0.419629	0.452467	0.0805958	0.00847416	1086.31	90.0222	86.2004	1187.18	95.5196	94.8171	1211.61	214.23	200.231	1181.02	95.062	94.3637	2.01608
3291A_28	54.1752	3.11388	2.10665	0.294484	4.87827	0.423635	0.510868	0.072697	0.00658022	1150.98	98.6055	94.0383	1202.07	98.6963	97.945	1005.52	189.322	178.425	1199.06	100.866	100.083	-19.5477
3291A_93	164.514	4.69078	2.39287	0.203808	4.85639	0.140931	0.305733	0.0851517	0.00522909	1240.47	61.9282	60.0955	1207.01	40.593	40.4658	1318.99	121.406	116.754	1212.06	41.8914	41.7555	8.48987
3291A_27	53.0615	3.50986	2.19547	0.344102	4.64273	0.339946	0.442717	0.0739485	0.00837763	1179.6	112.394	106.499	1257.47	87.7339	87.1409	1040.06	237.549	220.608	1250.01	92.7864	92.1222	-20.9035
3291A_59	137.618	2.93981	2.61038	0.232213	4.42609	0.113837	0.284643	0.0850147	0.00508755	1303.56	66.381	64.2795	1313.15	40.7516	40.6234	1315.87	118.302	113.881	1277.2	42.3838	42.2451	0.207011
3291A_15	93.0608	2.95562	2.71049	0.261927	4.31505	0.113758	0.267739	0.083328	0.00435876	1331.34	72.9723	70.4406	1343.65	42.2015	42.0637	1276.91	103.727	100.32	1328.58	43.3355	43.1905	-5.22644
3291A_95	45.2634	4.25648	2.7775	0.344337	4.16168	0.0900147	0.178633	0.0820581	0.00579624	1349.51	94.7326	90.5097	1388.19	39.1968	39.0791	1246.9	141.531	135.272	1370.1	40.434	40.3074	-11.331
3291A_99	120.427	6.32393	2.60038	0.275899	4.20972	0.10045	0.195481	0.0837754	0.00509763	1300.75	79.3392	76.3559	1373.92	40.7947	40.6662	1287.34	120.821	116.22	1371.45	44.3618	44.2096	-6.72565
3291A_31	150.885	4.63975	2.89543	0.324649	4.14433	0.328963	0.559279	0.083436	0.00697785	1380.72	86.4368	82.9071	1393.42	103.731	102.903	1279.43	167.505	158.793	1389.16	105.577	104.72	-8.90885
3291A_48	164.079	2.90501	3.04813	0.281014	4.02309	0.17289	0.332616	0.0894773	0.00597788	1419.77	71.7384	69.2903	1431.07	62.3971	62.0979	1414.4	130.554	125.164	1408.44	62.4011	62.0995	-1.17881
3291A_45	187.473	3.17656	3.27221	0.335016	4.04746	0.219923	0.419332	0.0917375	0.00691452	1474.47	81.2266	78.1025	1423.34	75.3448	74.9081	1461.96	146.736	139.945	1408.99	74.7217	74.2924	2.64139
3291A_94	38.2067	1.86438	3.09092	0.312134	4.04103	0.125648	0.103683	0.0955147	0.00753402	1430.44	78.9893	76.0318	1425.37	49.3101	49.122	1538.24	152.151	144.835	1410.81	50.7444	50.5454	7.33778
3291A_100	202.89	4.40018	2.95072	0.220831	4.06342	0.0870046	0.227233	0.0885094	0.00477318	1395.03	57.5643	55.9775	1418.32	39.7671	39.6436	1393.56	105.247	101.72	1416.8	39.5921	39.4721	-1.77667
3291A_34	95.782	2.66427	3.70006	0.467711	3.51647	0.20353	0.303053	0.0906662	0.00870003	1571.38	103.643	98.6091	1613.36	88.8766	88.2683	1439.6	188.656	177.588	1424.42	189.332	178.196	-12.0701
3291A_12	95.9899	2.86358	3.24389	0.309072	4.01746	0.0851878	0.197086	0.0880706	0.00523922	1467.72	75.3279	72.6335	1432.87	39.9611	39.8366	1384.02	116.464	112.162	1433.3	40.2795	40.1541	-3.52935
3291A_66	69.3485	3.49636	3.20084	0.393574	3.94768	0.114585	0.187101	0.0911831	0.00645574	1457.36	97.4309	92.9696	1455.54	48.2126	48.032	1450.43	137.846	131.84	1433.78	47.7992	47.6239	-0.352379
3291A_36	186.997	5.75117	3.7701	0.524553	4.05205	0.353387	0.44872	0.107701	0.0115145	1586.4	114.846	108.697	1421.89	115.412	114.387	1760.88	202.146	189.298	1454.49	125.972	124.754	19.2508
3291A_91	55.1057	3.50151	3.0317	0.361607	3.90939	0.213291	0.209859	0.0909576	0.00730313	1415.63	93.1757	89.0876	1468.29	77.8004	77.3347	1445.71	156.914	149.179	1462.32	78.5579	78.0821	-1.56137
3291A_74	72.877	1.68888	2.97433	0.267793	3.86905	0.231609	0.420681	0.0875216	0.00618244	1401.08	69.5963	67.2898	1481.97	85.1037	84.5456	1372.01	139.032	132.948	1462.8	84.1657	83.6209	-8.01462
3291A_18	142.189	5.55385	3.59546	0.404649	3.92259	0.257958	0.459239	0.0923783	0.00746042	1548.53	91.4368	87.4961	1463.87	91.354	90.7113	1475.17	157.215	149.44	1472.99	97.2538	96.5279	0.766282
3291A_19	94.7762	2.49973	3.13056	0.424712	3.82895	0.236183	0.337871	0.0875738	0.00668396	1440.23	107.183	101.809	1495.82	87.9484	87.3511	1373.15	150.477	143.376	1476.65	95.3892	94.6887	-8.93318
3291A_87	60.2501	4.67527	3.24378	0.363761	3.7608	0.276172	0.44867	0.0903839	0.00744431	1467.69	88.955	85.2213	1519.96	104.481	103.641	1433.65	161.34	153.179	1513.05	105.701	104.841	-6.02
3291A_89	123.731	3.44198	3.76619	0.309934	3.56677	0.197354	0.482424	0.0955866	0.00604583	1585.57	67.1255	64.9773	1593.2	84.6566	84.1046	1539.66	121.367	116.666	1521.19	122.15	117.394	-3.47745
3291A_80	211.695	1.63656	4.18493	0.433457	3.42414	0.222287	0.367365	0.0962675	0.00777844	1671.07	86.7104	83.1591	1651.73	100.638	99.8589	1553	155.648	147.995	1544.14	156.026	148.34	-6.3577
3291A_70	92.4113	0.880845	4.08397	0.351242	3.41019	0.179643	0.366898	0.0957818	0.00634435	1651.11	71.3914	68.9664	1657.69	84.2107	83.6645	1543.5	127.157	122.005	1547.37	128.43	123.175	-7.39859
3291A_24	42.608	1.6966	3.4844	0.646246	3.6615	0.30502	0.268741	0.0880404	0.0121198	1523.69	151.866	141.295	1556.58	119.826	118.723	1383.37	276.631	253.525	1551.48	119.441	118.346	-12.5213
3291A_5	113.958	2.9724	4.01671	0.335859	3.6197	0.0876012	0.247581	0.0990116	0.00594059	1637.58	69.1418	66.865	1572.53	45.9748	45.8124	1605.58	114.008	109.836	1572.74	116.826	112.456	2.05875
3291A_46	218.278	4.40293	4.09964	0.343877	3.55163	0.141501	0.259829	0.0980773	0.0061886	1654.23	69.6497	67.3401	1599.22	64.9783	64.6537	1587.88	120.298	115.667	1573.44	120.924	116.248	-0.713843
3291A_11	182.38	2.35793	4.24344	0.313999	3.46233	0.0695087	0.249943	0.0976019	0.00469532	1682.47	61.7341	59.9128	1635.65	43.8016	43.6532	1578.8	91.3864	88.6903	1594.8	93.9055	91.0589	-3.60058
3291A_109	61.4546	2.87403	3.53494	0.347901	3.5036	0.0731163	0.182007	0.0978108	0.0061237	1535.07	79.4291	76.4392	1618.6	44.2058	44.0545	1582.8	119.423	114.858	1594.91	127.01	121.857	-2.2622
3291A_65	61.6491	2.43149	3.75244	0.442468	3.67361	0.129835	0.277432	0.100333	0.0061049	1582.63	96.8066	92.4012	1552.02	58.1493	57.8884	1630.27	115.276	111.008	1598.3	120.078	115.461	4.79982
3291A_54	197.211	7.15867	3.9351	0.326949	3.54347	0.10917	0.289223	0.0993677	0.00574233	1620.93	68.4081	66.1788	1602.48	54.1664	53.9399	1612.28	109.634	105.77	1600.34	110.16	106.262	0.607713
3291A_85	336.377	2.78684	3.35658	0.292879	3.67444	0.241202	0.479268	0.0997974	0.00720181	1494.33	69.4347	67.1388	1551.71	96.1249	95.4135	1620.31	137.394	131.376	1600.49	138.212	132.129	4.23394
3291A_44	524.774	24.3383	4.32113	0.3957	3.35273	0.203514	0.532452	0.0998264	0.00637158	1697.4	76.9473	74.1379	1682.7	96.2583	95.5436	1620.85	121.187	116.481	1604.74	121.878	117.123	-3.81559
3291A_73	70.0521	1.91086	4.10295	0.419988	3.3621	0.107388	0.272822	0.0957861	0.00619004	1654.89	85.3375	81.8955	1678.57	58.153	57.8929	1543.58	123.993	119.089	1607.59	132.178	126.602	-8.74499
3291A_47	96.5695	1.66755	3.84342	0.344737	3.69021	0.140161	0.374368	0.100292	0.00605024	1601.89	73.5887	71.0148	1545.81	60.8212	60.5355	1629.5	114.284	110.088	1616.3	114.858	110.624	5.13581
3291A_71	71.2426	1.50752	4.07231	0.448994	3.56223	0.143542	0.326914	0.098636	0.00664101	1648.78	91.93	87.9481	1595	65.6108	65.2786	1598.49	128.356	123.094	1623.71	130.81	125.343	0.218581
3291A_49	269.891	2.51706	4.29018	0.352716	3.30299	0.126904	0.424129	0.102224	0.00553741	1691.48	68.8533	66.5954	1704.96	66.8593	66.5143	1664.89	101.949	98.5908	1651.69	102.541	99.1461	-2.40658
3291A_96	285.175	3.06577	4.60858	0.350927	3.24502	0.0925501	0.262264	0.103184	0.00513772	1750.82	64.5473	62.5588	1731.67	55.4515	55.214	1682.18	93.3722	90.5452	1663.31	94.2103	91.3358	-2.9422
3291A_63	56.0416	2.24951	3.88918	0.353764	3.43938	0.0783074	0.288721	0.104413	0.0054018	1611.44	74.8316	72.1718	1645.28	46.8178	46.6484	1704	96.8054	93.7667	1667.2	98.7184	95.5662	3.44647
3291A_1	82.2957	3.59254	4.36522	0.413007	3.31523	0.0519823	0.207484	0.107571	0.00557721	1705.78	79.7068	76.696	1699.43	40.6448	40.5173	1758.67	96.3491	93.3309	1720.3	99.3702	96.1687	3.36873
3291A_72	230.686	3.09428	5.57113	0.50323	2.94464	0.102915	0.265479	0.106619	0.00601642	1911.65	79.2879	76.3082	1884.74	68.4073	68.0465	1742.4	105.232	101.645	1750.53	106.744	103.053	-8.16954
3291A_60	155.444	1.94772	4.82365	0.362417	3.17789	0.136695	0.224984	0.109093	0.00647697	1789.03	64.1932	62.2261	1763.66	75.2301	74.7947	1784.33	110.238	106.3	1777.44	112.174	108.101	1.15825
3291A_101	138.971	3.0082	5.35006	0.465819	2.97562	0.0579496	0.231692	0.110195	0.00522334	1876.9	75.8854	73.1514	1867.71	48.558	48.3746	1802.63	87.4828	84.9823	1789.95	88.6734	86.1071	-3.61017
3291A_75	413.297	4.94976	5.1029	0.354198	3.13401	0.146079	0.544314	0.11082	0.00579072	1836.59	59.8026	58.0917	1785.23	81.1897	80.6817	1812.9	96.4631	93.4302	1808.08	96.681	93.635	1.52623
3291A_16	42.4721	0.739999	4.67131	0.473118	3.34153	0.107871	0.146904	0.11135	0.00680878	1762.12	86.5239	82.9874	1687.66	58.6352	58.3698	1821.57	113.076	108.929	1810.71	114.859	110.585	7.35162
3291A_14	90.6794	4.51232	5.13664	0.460062	2.96392	0.0784408	0.251064	0.115872	0.00635905	1842.19	77.5863	74.7309	1874.1	56.7787	56.5297	1893.49	100.401	97.1074	1878.13	105.314	101.699	1.02361
3291A_102	253.534	3.68038	5.47525	0.393605	2.85939	0.0686291	0.249696	0.115805	0.00591732	1896.72	62.6784	60.8019	1933.29	55.2694	55.0346	1892.44	93.3828	90.527	1887.68	94.6396	91.7085	-2.15865
3291A_13	49.5692	1.45452	8.63546	0.988477	3.19898	0.0737344	0.190238	0.182521	0.0110417	2300.3	106.932	101.582	1753.48	49.7474	49.5539	2675.91	101.9	98.3973	2425.74	123.842	118.756	34.4716
3291A_17	29.3374	1.67422	12.1792	1.55344	2.14921	0.109091	0.475324	0.168746	0.0112783	2618.31	123.356	116.289	2462.86	114.204	113.202	2545.24	114.238	109.876	2516.59	117.677	113.059	3.2367
3291A_88	44.9254	3.46787	11.1119	1.0529	2.01627	0.108276	0.453194	0.175579	0.0118743	2532.56	90.2445	86.4043	2596.44	125.16	123.955	2611.55	114.87	110.449	2595.37	115.447	110.985	0.578813
3291A_77	46.2388	1.17968	12.4201	1.33472	1.84044	0.0787917	0.479667	0.173507	0.0106424	2636.7	103.584	98.5561	2797.45	110.548	109.608	2591.77	104.187	100.54	2599.89	107.306	103.44	-7.93625
3291A_22	45.0426	2.84933	10.486	2.07727	2.22404	0.225647	0.246674	0.179259	0.0224044	2478.68	192.474	175.8	2393.62	209.441	206.092	2646.03	215.289	200.243	2622.32	218.489	203.022	9.53917
3291A_10	104.455	1.48316	12.8734	1.07435	2.00486	0.049218	0.257228	0.184435	0.00903296	2670.43	80.1936	77.1471	2608.58	71.7907	71.3946	2693.16	82.0821	79.7925	2677.48	82.7485	80.4239	3.14062
3291A_79	103.115	1.09751	13.0515	1.28213	1.94981	0.135033	0.53358	0.184887	0.0133661	2683.38	94.8284	90.5974	2668.87	160.32	158.351	2697.2	121.956	116.968	2690.33	122.201	117.195	1.05024
3291A_78	96.0092	4.16091	13.5688	1.58341	1.9349	0.140812	0.586933	0.187506	0.0138907	2720.09	113.469	107.463	2685.69	168.601	166.424	2720.41	124.764	119.545	2709.66	126.277	120.935	1.27635
3291A_61	22.8097	2.17119	14.3154	1.8052	1.85633	0.0553969	0.242565	0.190486	0.0106375	2770.84	123.353	116.287	2778	84.8773	84.322	2746.36	93.3153	90.3621	2738.06	93.6439	90.6703	-1.15203
3291A_40	22.1508	2.25837	12.7197	1.89604	1.98713	0.114205	0.27776	0.193514	0.0150477	2659.12	145.407	135.688	2627.7	133.941	132.564	2772.26	130.47	124.763	2759.67	130.901	125.159	5.21441
3291A_33	137.959	5.53214	14.1492	1.48753	1.99145	0.149346	0.585469	0.202459	0.0159263	2759.76	102.233	97.3323	2623.01	169.74	167.534	2846.12	131.133	125.353	2832.47	131.595	125.779	7.83902
3291A_67	64.4396	1.64239	15.3224	1.08234	1.74636	0.05398	0.359271	0.209001	0.0107883	2835.49	68.4715	66.2381	2918.56	90.5727	89.9424	2897.82	84.9699	82.5005	2890.89	85.254	82.7692	-0.716022
16051802 (329-02) targetted, Mweelrea Formation
3292A_1	777.44	2.92214	2.46766	0.203748	4.77653	0.0584117	0.4363	0.0859949	0.00471382	1262.61	60.5545	58.801	1225.39	50.8233	50.6238	1338.07	107.844	104.154	1244.65	51.6013	51.3957	8.42087
3292A_2	180.287	1.10427	0.719697	0.0916494	13.6788	0.319775	0.194245	0.0662501	0.00619866	550.488	54.8478	53.4053	454.841	20.8545	20.8208	814.286	201.951	189.729	459.151	21.7222	21.6843	44.1424
3292A_3	96.3136	0.916817	2.32767	0.277512	5.28712	0.118737	0.291772	0.0818933	0.0061807	1220.77	86.4943	82.9601	1116.71	48.5868	48.403	1242.97	151.553	144.399	1111.68	48.9025	48.7179	10.1576
3292A_4	268.796	0.765125	0.660218	0.073661	13.4808	0.310544	0.288078	0.0628879	0.00496552	514.747	45.5579	44.5584	461.286	21.1948	21.1615	704.442	172.647	163.692	456.307	21.5884	21.5537	34.5176
3292A_5	377.371	1.78033	10.1847	0.87852	2.44672	0.0439998	0.488502	0.184276	0.0100337	2451.69	81.3631	78.2286	2209.02	88.3933	87.7923	2691.74	91.4143	88.5841	2609.78	99.2247	95.9094	17.9334
3292A_6	404.434	1.21891	11.099	0.958488	2.30963	0.0422675	0.418124	0.182867	0.0103966	2531.48	82.0754	78.8866	2319.09	92.4938	91.8362	2679.04	95.6343	92.5419	2630.8	101.615	98.1374	13.4359
3292A_7	255.922	0.975546	0.63977	0.0841719	13.3435	0.253398	0.180276	0.0634086	0.00699431	502.164	52.8018	51.4636	465.866	20.4751	20.4413	721.965	243.171	225.755	464.573	21.3315	21.2977	35.4725
3292A_8	565.016	3.23603	0.62699	0.0572693	13.4537	0.243813	0.322646	0.0607145	0.00427701	494.219	36.0591	35.4301	462.183	20.4009	20.3701	629.134	155.524	148.252	459.131	21.3037	21.2686	26.5367
3292A_9	330.082	1.17068	3.34265	0.323445	3.9217	0.0753713	0.41719	0.100763	0.00595919	1491.08	77.0707	74.2527	1464.16	61.4555	61.1639	1638.2	111.869	107.843	1457.44	61.6676	61.3753	10.6236
3292A_10	1092.78	2.02144	1.73586	0.15602	5.96386	0.119878	0.421328	0.0772779	0.00476486	1021.93	58.7465	57.0948	999.298	44.3004	44.15	1128.37	125.345	120.441	1003.4	44.6642	44.5101	11.4389
3292A_11	290.065	1.8375	1.67404	0.190308	6.4873	0.207282	0.328227	0.0771961	0.00578946	998.72	73.5807	71.0075	924.169	45.4888	45.3303	1126.26	153.191	145.931	924.416	46.1967	46.0304	17.9434
3292A_12	299.208	0.533529	0.624481	0.0746062	13.736	0.37028	0.302216	0.0597853	0.00500104	492.652	47.1762	46.1054	453.01	21.6597	21.6249	595.813	186.599	176.248	447.99	21.7571	21.7189	23.9677
3292A_13	966.045	1.60548	6.98917	0.594358	2.74651	0.0479131	0.436835	0.14195	0.00800246	2110.05	76.9808	74.1687	2001.57	81.3104	80.8018	2251.14	99.0364	95.7804	2202.31	103.036	99.5239	11.0861
3292A_14	365.215	1.00241	1.80972	0.178156	6.0634	0.162874	0.376162	0.0748912	0.00508616	1048.98	65.425	63.3828	984.082	45.8537	45.6912	1065.58	139.667	133.626	978.169	46.0987	45.9357	7.64837
3292A_15	233.727	1.15111	0.671458	0.0820151	12.5416	0.423949	0.206601	0.059165	0.00542211	521.598	50.4442	49.2214	494.54	25.3651	25.3153	573.175	205.814	193.309	485.521	26.6162	26.5614	13.7191
3292A_16	182.731	1.11836	0.603283	0.0701253	14.4121	0.550316	0.237879	0.065227	0.00541784	479.315	44.9044	43.9326	432.458	23.3659	23.3237	781.666	179.577	169.865	430.814	25.1823	25.1333	44.6749
3292A_17	341.94	2.11944	2.68928	0.258637	4.53988	0.118561	0.372311	0.0853783	0.00612984	1325.51	72.461	69.9642	1283.3	57.9809	57.7225	1324.14	142.323	135.97	1275.18	58.2416	57.9796	3.08441
3292A_18	375.215	0.988921	0.626985	0.0719972	13.6473	0.335916	0.244827	0.0629897	0.00539829	494.216	45.4373	44.4428	455.853	21.1898	21.1564	707.884	187.729	177.186	451.749	23.6894	23.646	35.6034
3292A_19	841.801	0.505893	0.598861	0.0481049	13.9242	0.30275	0.35661	0.0589289	0.00385022	476.511	30.7818	30.3224	447.096	19.2983	19.2681	564.472	145.581	139.215	445	19.7485	19.7198	20.794
3292A_20	471.416	3.46088	4.18122	0.395133	3.68348	0.0701003	0.437452	0.110968	0.00662701	1670.35	78.9507	75.996	1548.32	64.518	64.1966	1815.33	110.472	106.512	1768.65	115.237	110.943	14.7084
3292A_21	396.117	3.31616	1.68965	0.157872	5.99476	0.12251	0.418365	0.0751452	0.00446755	1004.63	60.491	58.7411	994.524	43.1517	43.0078	1072.39	121.792	117.171	990.331	43.5541	43.4062	7.26091
3292A_22	183.449	1.33655	0.644542	0.0835315	13.1804	0.516297	0.210415	0.0619055	0.005782	505.114	52.2408	50.9306	471.424	25.651	25.6001	670.845	206.429	193.78	461.419	26.1984	26.1453	29.7268
3292A_23	536.957	3.41197	2.04194	0.186566	5.55352	0.125828	0.378091	0.0783839	0.00523125	1129.61	63.2497	61.3389	1067.34	47.3584	47.1862	1156.62	135.332	129.625	1053.82	47.4148	47.2409	7.7194
3292A_24	147.314	1.20776	2.18347	0.247376	5.42244	0.172841	0.315104	0.0814791	0.00607272	1175.79	80.4753	77.4075	1091.07	52.3712	52.1591	1233.03	149.831	142.839	1088.93	53.7324	53.5093	11.5128
3292A_25	289.481	1.58675	4.65291	0.414733	3.32103	0.0950186	0.449743	0.11339	0.00688217	1758.82	75.8954	73.1609	1696.82	76.4633	76.0125	1854.45	111.77	107.71	1822.07	113.672	109.482	8.50005
3292A_26	518.962	0.565805	0.602885	0.0528724	14.0533	0.558708	0.375624	0.0608727	0.00452438	479.063	33.7725	33.22	443.127	23.7499	23.7076	634.74	164.16	156.077	441.568	25.3604	25.3105	30.1875
3292A_27	286.12	1.00929	0.669478	0.0737283	13.2955	0.666138	0.396273	0.0581762	0.00486165	520.395	45.3443	44.354	467.487	29.2422	29.176	536.405	188.325	177.825	463.489	31.8396	31.7612	12.848
3292A_28	926.067	2.76323	3.11645	0.270323	4.12716	0.156515	0.486585	0.0927636	0.00597477	1436.76	67.7984	65.6079	1398.63	72.5354	72.1283	1483.07	124.585	119.65	1391.44	72.7599	72.3501	5.69334
3292A_29	190.609	0.837366	0.50537	0.0819038	13.8499	0.460891	0.126019	0.0508472	0.00713316	415.331	56.01	54.5066	449.413	22.8349	22.7946	233.911	340.969	308.61	451.842	25.8842	25.8337	-92.1295
3292A_30	247.747	1.12753	0.626758	0.0706508	13.5775	0.247263	0.2305	0.0604065	0.00558139	494.074	44.5842	43.6267	458.116	18.507	18.4805	618.168	205.969	193.412	449.05	18.5187	18.4936	25.8913
3292A_31	136.956	1.42145	0.6441	0.0846266	13.3212	0.442553	0.236223	0.0614359	0.00615902	504.842	52.949	51.6034	466.617	23.5073	23.4645	654.531	222.725	208.084	446.514	24.144	24.0988	28.7098
3292A_32	342.288	1.4998	0.604701	0.0605604	13.3556	0.387311	0.377014	0.05669	0.00404133	480.213	38.6863	37.9627	465.46	22.6392	22.5981	479.494	161.539	153.778	457.679	23.8168	23.7728	2.92688
3292A_33	394.781	0.888266	0.729217	0.0875658	14.1317	0.511527	0.333876	0.0634552	0.00482363	556.093	52.0802	50.7777	440.752	23.4207	23.3768	723.523	165.518	157.26	431.86	23.659	23.6157	39.0826
3292A_34	152.196	0.973409	12.2437	1.1906	2.08781	0.0593852	0.464361	0.183659	0.0111106	2623.26	93.3975	89.2906	2522.78	106.866	105.987	2686.19	101.802	98.3042	2658.72	103.072	99.492	6.08334
3292A_35	430.222	0.885756	0.54651	0.0569747	13.7098	0.421404	0.287435	0.0565815	0.00465757	442.708	37.7563	37.0672	453.848	22.6441	22.603	475.259	187.409	177.046	442.824	23.4218	23.3779	4.50506
3292A_36	254.913	1.96864	4.60462	0.45604	3.25289	0.0977574	0.452936	0.113623	0.00686539	1750.11	84.3478	80.9838	1727.99	78.9141	78.4338	1858.15	111.21	107.19	1807.92	115.457	111.14	7.00445
3292A_37	247.785	1.24935	0.757284	0.0774466	12.9152	0.695714	0.58162	0.0675118	0.00488034	572.442	45.2502	44.2639	480.752	31.414	31.3391	853.604	153.899	146.682	503.655	41.4074	41.2749	43.6798
3292A_38	205.9	2.06379	1.25479	0.128621	7.32413	0.269888	0.333866	0.07205	0.00499661	825.562	58.7632	57.1107	825.039	42.9029	42.7607	987.354	144.412	137.991	838.05	46.1707	46.0061	16.4393
3292A_39	34.1537	1.96093	1.68509	0.366826	6.14283	0.209487	0.116273	0.0802389	0.013169	1002.91	143.683	134.185	972.271	47.2831	47.109	1202.87	341.704	307.424	951.274	49.441	49.252	19.1705
3292A_40	265.015	0.884694	0.572335	0.0660213	13.4714	0.328785	0.259245	0.0554897	0.00501657	459.524	43.0892	42.194	461.599	21.254	21.2204	432.006	208.014	195.356	453.7	21.93	21.8914	-6.85004
3292A_41	174.049	0.891393	0.640374	0.0705406	13.4462	0.313864	0.217579	0.0634334	0.00561863	502.538	44.1406	43.2015	462.433	20.4688	20.4379	722.793	193.74	182.522	472.696	22.2575	22.2206	36.0214
3292A_42	296.098	1.17359	0.754522	0.0777547	11.9174	0.271076	0.283957	0.0640853	0.00504341	570.845	45.5046	44.5071	519.423	23.0057	22.9661	744.448	170.927	162.124	512.618	23.9273	23.883	30.2272
3292A_43	518.803	0.564666	0.586224	0.0549191	14.1286	0.561696	0.371338	0.0606169	0.00468214	468.453	35.4631	34.8544	440.843	24.2487	24.2032	625.666	171.04	162.288	434.527	24.6554	24.6069	29.5401
3292A_44	419.285	1.6567	4.37153	0.424712	3.56537	0.11714	0.411892	0.109187	0.0073024	1706.97	81.9134	78.7372	1593.76	75.0538	74.6208	1785.9	124.451	119.455	1746.65	130.446	124.978	10.7588
3292A_45	177.637	0.857052	1.8296	0.191412	5.73467	0.316112	0.324473	0.074449	0.00630172	1056.14	69.8753	67.5508	1036.19	65.5927	65.2619	1053.66	175.382	165.967	1032.28	66.5567	66.216	1.65869
3292A_46	473.764	0.806042	0.590927	0.0567852	13.4537	0.434872	0.360498	0.0572203	0.00410434	471.459	36.5696	35.9226	462.183	23.1494	23.1065	500.032	161.981	154.17	457.211	23.2806	23.2372	7.56927
3292A_47	431.218	1.65002	3.71075	0.335864	3.74313	0.134068	0.437825	0.102792	0.00703761	1573.69	73.716	71.1333	1526.35	74.8214	74.3887	1675.13	129.271	123.916	1643.02	132.062	126.488	8.88198
3292A_48	694.392	2.67408	9.78096	0.789417	2.58425	0.0671403	0.562033	0.179761	0.00992927	2414.36	75.7446	73.0212	2108.71	89.8466	89.2262	2650.67	93.1206	90.1897	2611.62	108.86	104.882	20.4461
3292A_49	514.356	0.861968	0.546226	0.0502141	13.444	0.445299	0.320498	0.0542042	0.0041174	442.521	33.2456	32.7098	462.505	23.4005	23.3581	379.542	175.495	166.43	455.558	23.3225	23.2803	-21.8585
3292A_50	89.3996	1.14031	0.498573	0.0760856	13.356	0.526404	0.138881	0.0535907	0.00676956	410.736	52.2187	50.9096	465.446	24.8739	24.8261	353.887	298.702	273.39	455.841	29.0942	29.0272	-31.5237
3292A_51	114.361	1.10373	0.739991	0.0908576	13.5424	0.422783	0.189014	0.0675099	0.0061664	562.4	53.725	52.3402	459.264	22.1663	22.1283	853.543	195.75	184.22	446.641	23.2642	23.2238	46.1933
3292A_52	1164.98	3.04422	1.50924	0.123452	6.53021	0.136137	0.388318	0.0720716	0.00434836	934.133	50.5805	49.3513	918.51	40.0513	39.9274	987.963	125.244	120.385	905.807	40.2872	40.1617	7.02991
3292A_53	460.677	1.03382	0.621987	0.0598382	14.0507	0.419024	0.299844	0.0618781	0.00457483	491.092	37.8093	37.1181	443.206	21.4714	21.4371	669.899	162.308	154.385	444.852	22.1054	22.066	33.8399
3292A_54	677.527	1.46819	0.580035	0.0539836	13.6555	0.25871	0.320127	0.0575425	0.00411277	464.484	34.9915	34.3987	455.591	19.7089	19.6788	512.387	161.044	153.314	447.648	19.8553	19.8248	11.0846
3292A_55	98.0132	1.50263	14.8642	1.58373	1.99608	0.0444764	0.41171	0.203133	0.0118923	2806.58	103.983	98.9174	2618.02	100.001	99.2319	2851.53	96.967	93.7692	2804.94	100.435	97.0145	8.18907
3292A_56	523.021	0.897451	0.647926	0.0665189	13.4077	0.261154	0.298186	0.0601349	0.00444747	507.202	41.4053	40.578	463.713	20.0752	20.0439	608.431	164.059	155.998	462.609	20.7291	20.6944	23.7854
3292A_57	845.905	0.499315	0.583319	0.0506093	13.9256	0.302781	0.334171	0.0591552	0.00403173	466.592	32.718	32.199	447.053	20.0137	19.9841	572.812	151.795	144.884	445.031	20.4136	20.3814	21.9547
3292A_58	426.322	2.06239	2.86016	0.233789	4.22935	0.0854925	0.408405	0.0929209	0.00527499	1371.49	62.4468	60.5834	1368.18	56.6189	56.3715	1486.28	109.488	105.658	1354.21	56.8146	56.5665	7.9459
3292A_59	252.405	1.93346	1.68366	0.159506	5.78435	0.111094	0.333213	0.0750296	0.00517857	1002.37	61.2651	59.4708	1027.96	42.5114	42.3728	1069.29	141.915	135.682	1015.77	42.7328	42.5918	3.86545
3292A_60	1054.12	1.41572	2.51368	0.218132	4.68773	0.0828994	0.407232	0.0865813	0.00515113	1276	64.0348	62.0774	1246.49	51.6413	51.4351	1351.19	117.013	112.678	1239.67	52.1517	51.9431	7.74856
3292A_61	175.265	0.880685	2.87202	0.288996	4.30169	0.105654	0.300981	0.0900359	0.00653558	1374.6	77.2352	74.4053	1347.41	57.5059	57.2507	1426.29	141.883	135.535	1337.8	57.9558	57.6965	5.53029
3292A_62	253.51	0.572048	1.75123	0.173589	5.95835	0.120539	0.314722	0.0773998	0.00528912	1027.62	65.0981	63.0761	1000.15	41.8966	41.7621	1131.51	139.163	133.143	995.199	42.7614	42.6186	11.6091
3292A_63	197.955	1.20904	10.7884	1.15438	2.37056	0.0515104	0.458355	0.182821	0.0104174	2505.07	101.948	97.0744	2268.83	88.8781	88.2693	2678.62	95.8567	92.7505	2616.11	111.221	107.07	15.2987
3292A_64	407.027	0.947167	0.614635	0.0693341	13.1765	0.244528	0.237155	0.0566391	0.00501867	486.479	44.0765	43.1401	471.561	20.0407	20.0096	477.509	202.113	190.11	466.755	20.942	20.908	1.24578
3292A_65	140.783	1.32129	0.787226	0.0898972	13.9213	0.363967	0.148686	0.0690611	0.0056073	589.597	51.7268	50.4419	447.186	20.2215	20.1899	900.564	172.093	163.094	443.722	22.2788	22.2404	50.3438
3292A_66	77.0199	2.06536	2.34152	0.313041	5.34438	0.131494	0.261877	0.0905718	0.00761208	1224.99	97.4232	92.9624	1105.71	46.9741	46.8047	1437.62	164.635	156.144	1083.61	47.2374	47.0662	23.087
3292A_67	242.113	0.839682	0.64912	0.0851246	13.5272	0.281144	0.177033	0.0576456	0.00584748	507.937	53.1005	51.7474	459.761	19.7679	19.7375	516.32	230.883	215.314	461.331	20.8292	20.7942	10.9542
3292A_68	198.033	1.27675	11.4803	0.964628	2.13375	0.037781	0.402753	0.184414	0.0103481	2562.98	80.0377	77.0021	2477.67	91.9318	91.2824	2692.97	94.2438	91.2382	2666.76	96.0721	92.9532	7.99478
3292A_69	116.725	1.23982	0.813858	0.129803	13.2432	0.460581	0.146341	0.0696043	0.00770112	604.616	73.9949	71.393	469.269	23.5363	23.4948	916.704	236.312	219.652	460.648	28.3841	28.3217	48.809
3292A_70	551.61	2.51514	2.97241	0.2371	4.28681	0.0644028	0.415199	0.0937462	0.00502666	1400.59	61.5275	59.7182	1351.63	53.3817	53.1618	1503.01	103.077	99.6724	1339.12	53.8005	53.5768	10.0713
3292A_71	471.368	0.837981	17.6886	1.54956	1.95789	0.0260772	0.454232	0.246244	0.0128008	2972.95	85.9856	82.4923	2659.85	95.6058	94.9011	3160.78	83.6903	81.2719	3078.35	90.1897	87.3953	15.8483
3292A_72	452.733	1.09064	0.577387	0.0474391	14.4887	0.278489	0.343097	0.057092	0.00366961	462.781	30.7691	30.3098	430.245	17.8745	17.8484	495.087	144.889	138.608	427.894	18.3333	18.3073	13.0971
3292A_73	247.087	1.13102	0.617328	0.0719599	13.4677	0.24527	0.201676	0.061348	0.00577156	488.171	45.6877	44.6824	461.721	19.2617	19.2344	651.459	208.661	195.759	455.814	19.3698	19.3422	29.125
3292A_74	631.434	1.21641	0.573854	0.0527604	13.4015	0.277538	0.328874	0.0575671	0.0038411	460.504	34.3271	33.7567	463.92	20.2077	20.1761	513.324	150.063	143.329	458.395	20.5089	20.4764	9.6243
3292A_75	244.328	0.839357	0.66199	0.0844285	13.596	0.282578	0.200674	0.0570203	0.00568824	515.831	52.2474	50.937	457.513	19.0091	18.9811	492.32	227.876	212.718	441.385	20.1894	20.1578	7.06998
3292A_76	511.333	1.28388	0.586748	0.0511635	13.7937	0.297397	0.33479	0.058764	0.00397143	468.789	33.0069	32.4792	451.181	19.7554	19.7252	558.365	150.863	144.041	445.553	19.9609	19.9315	19.1961
3292A_77	275.598	0.629758	0.794122	0.1027	12.5302	0.36283	0.182931	0.0729013	0.00716025	593.508	58.9711	57.3069	494.973	23.3584	23.3147	1011.21	205.796	192.98	491.513	25.808	25.755	51.0515
3292A_78	204.807	1.2887	0.578162	0.0689791	13.1321	0.497011	0.259651	0.0579734	0.00576409	463.28	44.873	43.9028	473.097	24.8258	24.7781	528.756	225.649	210.744	478.035	27.0962	27.0379	10.5265
3292A_79	153.272	3.24824	1.39034	0.177089	7.08103	0.361459	0.301449	0.0663062	0.00524687	884.84	76.6534	73.8649	851.571	51.4854	51.2818	816.058	169.89	161.156	831.331	51.2583	51.054	-4.35176
3292A_80	315.394	0.917268	0.63929	0.0628846	12.9334	0.567947	0.34289	0.0591891	0.00457098	501.866	39.3294	38.5823	480.102	27.3648	27.3083	574.058	172.518	163.645	470.275	28.8171	28.7528	16.3671
3292A_81	428.732	3.40836	2.79041	0.222767	4.46393	0.117589	0.404652	0.0890538	0.00497936	1352.97	60.5696	58.8154	1303.07	56.6187	56.371	1405.32	109.015	105.232	1291.43	57.9379	57.6799	7.27572
3292A_82	232.652	0.815341	0.619693	0.0647322	13.5016	0.474785	0.181611	0.0651015	0.00592156	489.655	40.9914	40.1803	460.602	23.2182	23.1765	777.62	197.326	185.666	481.66	26.788	26.7338	40.7677
3292A_83	245.963	1.10423	0.59238	0.0721592	13.6167	0.445317	0.223554	0.0616352	0.00598845	472.386	46.5417	45.4989	456.841	22.3023	22.2638	661.475	215.365	201.641	463.607	23.8077	23.7653	30.936
3292A_84	456.926	1.48401	0.806999	0.080494	13.2456	0.390091	0.188083	0.0793402	0.00579512	600.769	45.7422	44.7347	469.187	22.1365	22.0986	1180.63	147.897	141.099	468.371	27.5923	27.5334	60.2598
3292A_85	139.662	1.3265	0.804099	0.0885391	13.9674	0.365184	0.201167	0.0683636	0.00540431	599.138	50.4532	49.23	445.76	19.5351	19.5069	879.598	167.991	159.416	438.496	20.6946	20.6629	49.3222
3292A_86	273.393	0.879777	0.685077	0.0699748	12.8893	0.498437	0.355044	0.0586037	0.00445183	529.838	42.6088	41.7331	481.685	25.3744	25.3245	552.405	170.256	161.619	485.683	29.2053	29.1394	12.8024
3292A_87	462.964	1.79187	2.7388	0.243846	4.90432	0.130185	0.39685	0.0959938	0.00594973	1339.05	67.3275	65.1668	1196.25	52.3231	52.1114	1547.65	118.756	114.249	1228.4	56.4363	56.1903	22.7056
3292A_88	91.9294	0.662878	11.7921	1.35723	2.12087	0.0472139	0.428667	0.186334	0.00996583	2588.04	110.694	104.971	2490.15	93.5242	92.8516	2710.07	89.6122	86.8887	2671.39	92.3419	89.4567	8.11498
3292A_89	110.43	0.605689	0.638164	0.109789	12.9748	0.44819	0.106572	0.0598916	0.00953063	501.169	69.2168	66.9351	478.625	23.6351	23.5932	599.659	364.624	327.063	471.92	24.5842	24.5374	20.1838
3292A_90	518.263	1.28487	0.595267	0.0486728	13.9293	0.300314	0.380736	0.0578925	0.00376969	474.226	31.2189	30.7462	446.937	18.9857	18.9593	525.696	146.048	139.657	436.267	19.42	19.3894	14.9819
3292A_91	217.747	1.88678	12.3395	1.03418	2.14832	0.052199	0.36258	0.201634	0.011495	2630.58	80.2861	77.2323	2463.71	95.8993	95.1915	2839.47	94.4846	91.4469	2755.07	108.636	104.653	13.2336
3292A_92	272.209	0.966234	1.56465	0.143049	6.43766	0.228593	0.524532	0.0793067	0.00478163	956.312	57.4398	55.8598	930.806	45.8011	45.6389	1179.8	121.581	116.95	932.953	47.9787	47.7995	21.1049
3292A_93	405.061	1.0411	0.590434	0.0496573	14.2393	0.296618	0.353425	0.0592718	0.00366807	471.145	31.9529	31.4579	437.531	18.4569	18.4291	577.094	137.426	131.735	442.515	20.0766	20.044	24.1837
3292A_94	396.969	0.866341	0.664438	0.0682932	13.3171	0.3679	0.243665	0.061317	0.00508309	517.325	42.0953	41.2403	466.756	21.3945	21.3605	650.374	183.168	173.151	457.121	21.5011	21.4639	28.2327
3292A_95	420.764	0.961836	0.614498	0.0698754	13.5326	0.262964	0.179932	0.0597756	0.00562374	486.393	44.428	43.4769	459.582	19.1922	19.1651	595.461	210.664	197.565	455.608	19.5353	19.5072	22.8191
3292A_96	464.065	1.24142	2.973	0.248544	4.36848	0.0810655	0.393643	0.0939401	0.00513724	1400.74	64.535	62.5474	1328.8	52.7352	52.5205	1506.91	105.108	101.569	1315.54	53.0541	52.8381	11.8197
3292A_97	199.428	1.63566	19.1845	2.02035	1.78572	0.032856	0.373063	0.24576	0.0136116	3051.14	104.266	99.1724	2866.62	101.705	100.908	3157.65	89.2766	86.5302	3132.2	93.7998	90.7746	9.21662
3292A_98	313.031	1.43282	2.01896	0.19191	5.34162	0.103618	0.326226	0.0834289	0.00533249	1121.91	65.5943	63.5416	1106.24	44.4759	44.3241	1279.27	127.188	122.102	1097.77	45.0417	44.8848	13.5257
3292A_99	479.045	1.05719	0.603484	0.0597905	14.004	0.367345	0.306083	0.0572592	0.00402524	479.442	38.2188	37.5129	444.635	20.0284	19.9973	501.529	158.629	151.129	439.167	20.425	20.3927	11.3441
3292A_100	449.224	1.08922	0.578184	0.0499101	14.2885	0.274642	0.303278	0.0589584	0.00389208	463.294	32.3681	31.8602	436.074	18.1979	18.1722	565.559	147.098	140.601	432.152	18.6724	18.644	22.8951
3292A_101	314.552	1.16462	0.697913	0.0632411	12.6999	0.339951	0.301573	0.0649038	0.00435498	537.544	38.1758	37.4716	488.601	22.0356	21.9966	771.22	144.509	138.158	480.473	23.261	23.2191	36.6457
3292A_102	466.929	1.00106	0.661359	0.0623187	13.2773	0.321853	0.284131	0.0653485	0.00479218	515.445	38.4493	37.7349	468.108	20.6226	20.5897	785.576	157.906	150.347	464.347	21.7664	21.7311	40.4121
3292A_103	292.166	0.996714	0.812311	0.0808374	11.9131	0.354262	0.238513	0.0736637	0.00512447	603.75	45.8033	44.793	519.603	24.2267	24.1812	1032.27	143.874	137.483	499.233	27.4205	27.3623	49.664
3292A_104	410.055	1.04362	0.592602	0.0520784	14.0952	0.293617	0.325983	0.061281	0.00390282	472.528	33.4776	32.9346	441.852	18.7176	18.6919	649.11	139.8	133.89	438.208	19.5838	19.5542	31.9295
3292A_105	104.542	1.05785	3.31937	0.344991	4.19024	0.0892593	0.299298	0.098468	0.00614146	1485.62	82.7631	79.5218	1379.67	54.6448	54.4154	1595.31	118.764	114.246	1403.68	58.1389	57.879	13.5169
3292A_106	297.635	1.98557	11.2087	0.89945	2.24637	0.0466411	0.459736	0.184592	0.00985977	2540.64	76.2188	73.4613	2373.71	89.616	88.9959	2694.57	89.6247	86.9017	2652.67	94.2592	91.2575	11.9075
3292A_107	216.628	0.521327	4.60998	0.416233	3.2467	0.0725732	0.388636	0.113259	0.0064804	1751.08	76.7695	73.9726	1730.88	69.0247	68.6572	1852.35	105.28	101.671	1796.19	109.211	105.343	6.55725
3292A_108	475.774	1.06177	0.607151	0.062026	13.9055	0.364761	0.269578	0.0592963	0.00425776	481.762	39.5705	38.814	447.678	20.2257	20.1941	577.99	159.989	152.328	444.319	20.528	20.4967	22.5458
3292A_109	739.404	2.09087	1.78142	0.140748	6.05024	0.119996	0.405301	0.0822812	0.00457781	1038.7	52.0427	50.7424	986.068	40.6731	40.5453	1252.22	110.841	106.963	988.051	42.1619	42.0232	21.2544
3292A_110	570.007	1.51936	0.736691	0.0671077	11.5701	0.376837	0.274037	0.0633339	0.0048306	560.473	39.6195	38.8613	534.387	26.0706	26.0179	719.461	166.201	157.88	533.034	28.2058	28.1427	25.7239
16051802 (329-02) random, Mweelrea Formation
3292A_7	109.521	1.25752	0.565887	0.0622258	14.1616	0.51048	0.205474	0.0592748	0.00537608	455.351	40.7559	39.9541	439.85	18.134	18.1085	577.203	203.479	191.245	440.736	19.6624	19.6325	23.7963
3292A_110	111.247	1.25947	0.577658	0.0627309	14.1257	0.507919	0.214604	0.0605742	0.00542507	462.955	40.7803	39.9776	440.931	18.003	17.9765	624.148	199.241	187.464	442.801	18.8154	18.788	29.3548
3292A_39	134.434	1.94114	0.610008	0.0810413	13.7184	0.362303	0.140954	0.0595358	0.00639276	483.565	51.7645	50.4777	453.572	15.2066	15.1886	586.745	241.952	224.838	446.633	16.7895	16.7676	22.6968
3292A_63	168.791	45.5005	0.637859	0.0680267	13.885	0.419214	0.233239	0.0572173	0.00431325	500.98	42.6168	41.7408	448.314	16.1994	16.1777	499.918	170.461	161.832	450.806	17.0268	17.0044	10.3224
3292A_96	102.149	2.10076	0.613462	0.0748321	13.7182	0.375535	0.151031	0.0578176	0.00590141	485.741	47.6478	46.5555	453.577	15.5522	15.532	522.856	232.108	216.372	451.431	16.1901	16.1713	13.25
3292A_94	102.194	2.1095	0.633203	0.0759131	13.6931	0.37583	0.164572	0.0587328	0.00592912	498.089	47.7531	46.6561	454.381	15.3223	15.3055	557.207	228.104	212.859	451.482	16.1628	16.1411	18.4539
3292A_43	143.543	1.18652	0.552433	0.0508093	13.8089	0.305859	0.164934	0.0562252	0.00389865	446.589	33.5071	32.9632	450.7	13.6767	13.6623	461.273	157.516	150.137	451.736	14.0274	14.0122	2.29214
3292A_9	99.5066	2.2714	0.69131	0.0748634	13.7965	0.470021	0.140373	0.0620072	0.00552249	533.587	45.4493	44.4543	451.092	17.8556	17.8323	674.356	196.422	184.933	453.33	19.2036	19.1765	33.1078
3292A_77	120.739	1.65432	0.54921	0.0590726	13.8166	0.410703	0.137384	0.0553966	0.00478875	444.479	39.0913	38.353	450.457	16.0735	16.0521	428.264	198.746	187.163	456.254	17.4842	17.4605	-5.18228
3292A_86	131.818	1.60528	0.625013	0.0539257	13.7715	0.365324	0.199431	0.0607661	0.00433401	492.985	33.978	33.4188	451.885	14.9595	14.9422	630.965	157.463	150.012	456.295	16.1937	16.1734	28.382
3292A_104	75.1615	0.905975	0.806831	0.0864376	13.2525	0.427765	0.104248	0.0757612	0.00677393	600.675	49.1657	48.0033	468.951	17.5414	17.5176	1088.77	184.569	174.151	458.174	21.4932	21.4561	56.9283
3292A_84	114.225	1.34623	0.645332	0.0619294	13.714	0.391763	0.126376	0.0621746	0.00454428	505.602	38.5827	37.8633	453.712	15.7269	15.7077	680.118	160.133	152.412	460.184	17.5538	17.5314	33.2892
3292A_97	160.531	1.55634	0.614005	0.0582637	13.5536	0.317814	0.140751	0.0601535	0.0045613	486.083	36.9889	36.3272	458.895	14.1064	14.0924	609.102	168.298	159.825	460.73	14.4577	14.4386	24.6604
3292A_50	56.3826	1.74721	0.637195	0.108442	13.7863	0.666521	0.0899344	0.0630286	0.00851932	500.568	68.3941	66.1656	451.414	23.2082	23.168	709.195	301.298	275.026	460.88	24.7253	24.6765	36.3484
3292A_91	160.339	1.42878	0.576909	0.0605357	13.721	0.42692	0.218068	0.0574737	0.00402155	462.473	39.3583	38.61	453.489	16.5995	16.5767	509.755	157.648	150.235	462.325	19.5493	19.5212	11.0378
3292A_41	90.2297	1.63814	0.585966	0.0837779	13.5368	0.453905	0.154458	0.0594967	0.00761587	468.288	54.3582	52.941	459.446	17.8668	17.8407	585.321	290.676	266.322	462.984	17.9959	17.9709	21.5053
3292A_58	110.066	2.58465	0.513197	0.0527686	13.2614	0.371462	0.190996	0.0520676	0.00393702	420.596	35.7209	35.1037	468.649	16.134	16.1139	288.38	177.573	168.35	466.487	19.468	19.4386	-62.5109
3292A_33	45.7338	1.96693	0.742053	0.126113	13.5993	0.472435	0.0973888	0.0682144	0.00677598	563.603	74.8702	72.2079	457.406	18.3112	18.2852	875.075	212.735	199.171	467.381	22.7813	22.7412	47.7295
3292A_105	134.184	1.44548	0.506935	0.048827	13.2767	0.328254	0.170225	0.0535621	0.00432914	416.386	33.1695	32.6361	468.125	14.7859	14.7704	352.681	187.969	177.624	470.229	17.4649	17.4413	-32.7333
3292A_103	123.177	1.43291	0.599909	0.0643407	13.3915	0.341751	0.171618	0.0579395	0.00473882	477.176	41.2499	40.4288	464.256	14.9451	14.9278	527.475	184.485	174.402	472.071	16.197	16.1767	11.9853
3292A_11	149.34	2.43087	0.633293	0.051715	13.3958	0.434785	0.240239	0.0607156	0.00397468	498.145	32.4074	31.8984	464.112	17.7579	17.7335	629.173	144.274	137.995	473.934	20.664	20.6324	26.2345
3292A_69	129.682	1.13388	0.542749	0.0971937	13.3237	1.5999	0.399253	0.0561409	0.00904489	440.235	64.9987	62.9826	466.532	55.0558	54.8231	457.945	378.8	338.746	474.715	59.8534	59.5783	-1.87516
3292A_20	484.908	3.658	0.578195	0.0428543	13.2448	0.338185	0.258119	0.0565641	0.00326844	463.301	27.7606	27.3862	469.214	15.473	15.4531	474.579	130.418	125.314	477.926	16.2966	16.276	1.13027
3292A_90	131.891	1.61389	1.08036	0.120098	12.6989	0.386105	0.162617	0.0907428	0.0078625	743.808	59.4803	57.7876	488.64	17.5691	17.5453	1441.21	169.791	160.773	480.459	18.8715	18.8439	66.0952
3292A_83	126.753	2.05097	0.649008	0.0596345	12.9599	0.33671	0.184528	0.0612568	0.00457399	507.868	37.0563	36.3921	479.157	15.6463	15.6259	648.264	164.564	156.435	484.746	15.7584	15.7391	26.0861
3292A_22	185.669	2.11538	0.644993	0.0630804	12.9987	0.420656	0.13639	0.0611585	0.00517477	505.393	39.315	38.5682	477.777	18.2134	18.1891	644.815	187.244	176.793	486.858	19.7819	19.7516	25.9048
3292A_100	68.3407	3.64815	0.75569	0.0934182	10.7162	0.358853	0.172088	0.0589187	0.00587836	571.52	54.7591	53.3212	575.121	21.9105	21.8748	564.093	225.074	210.211	585.685	25.6668	25.6172	-1.95501
3292A_21	156.022	3.02279	1.4282	0.111718	6.99511	0.220465	0.255757	0.0718057	0.00425407	900.795	47.2621	46.187	861.362	31.355	31.279	980.44	123.08	118.387	873.601	32.1149	32.035	12.1453
3292A_73	321.806	3.75487	1.35325	0.231251	6.77934	0.975597	0.486637	0.0660294	0.0101571	868.96	102.316	97.4068	886.973	121.195	120.067	807.308	339.617	306.422	896.252	122.368	121.217	-9.86805
3292A_75	74.3887	3.12434	1.80984	0.317473	6.65397	0.863337	0.450387	0.0789303	0.0110308	1049.02	118.092	111.6	902.567	111.305	110.351	1170.39	289.919	264.906	913.885	112.584	111.609	22.883
3292A_57	31.2424	5.37109	1.42644	0.184982	6.77134	0.369227	0.138915	0.0719452	0.00803662	900.062	78.9229	75.9699	887.953	48.8975	48.7114	984.39	236.133	219.436	917.65	53.3993	53.1789	9.79664
3292A_32	105.536	4.48974	1.58199	0.152209	6.47916	0.15712	0.182848	0.0764087	0.00482135	963.153	60.7572	58.992	925.251	28.6086	28.5453	1105.8	128.771	123.607	938.316	31.193	31.119	16.3274
3292A_53	266.054	4.20016	1.72574	0.13807	6.20059	0.125258	0.328591	0.0762228	0.00333377	1018.17	52.0957	50.7926	963.859	26.8593	26.8033	1100.93	88.748	86.2655	966.91	27.9495	27.889	12.4503
3292A_78	250.065	13.514	1.60919	0.126996	6.15963	0.150029	0.233986	0.0732803	0.00401357	973.793	50.0323	48.8294	969.809	29.5179	29.4518	1021.72	112.892	108.923	986.868	30.2091	30.1371	5.08028
3292A_80	31.0766	0.85044	2.08097	0.371456	6.07656	0.268602	0.127477	0.0890164	0.0126961	1142.55	126.265	118.871	982.105	45.003	44.8464	1404.51	286.231	261.54	993.103	51.2156	51.0143	30.075
3292A_71	61.9044	1.8672	1.79117	0.200408	6.0671	0.676799	0.569636	0.0777085	0.00808247	1042.25	74.2462	71.6273	983.526	104.127	103.293	1139.43	214.128	200.194	997.412	105.457	104.602	13.6828
3292A_48	21.8532	1.7481	1.98264	0.246133	6.00053	0.189997	0.177226	0.0862715	0.00747615	1109.62	85.5691	82.109	993.638	35.6559	35.5575	1344.27	172.138	162.92	998.271	41.0161	40.8859	26.0836
3292A_64	138.614	3.43807	1.61308	0.107551	6.07834	0.180543	0.243192	0.0777917	0.00418443	975.307	42.2277	41.3674	981.838	33.723	33.635	1141.56	108.849	105.13	1001.54	36.132	36.0298	13.9914
3292A_61	171.26	6.03623	1.7258	0.179963	5.99444	0.303293	0.508944	0.076448	0.00521298	1018.19	68.1693	65.9553	994.573	50.9711	50.7705	1106.83	139.375	133.346	1002.93	51.3488	51.1464	10.1419
3292A_3	181.978	3.22321	1.81694	0.145304	5.87787	0.150582	0.242817	0.0757497	0.00427196	1051.58	53.0631	51.7115	1012.83	31.815	31.7367	1088.46	115.132	110.991	1015.76	31.944	31.8663	6.94889
3292A_101	84.1811	2.39711	1.88189	0.208499	5.91897	0.130426	0.248166	0.0810164	0.00418044	1074.73	74.8226	72.1634	1006.31	28.7053	28.6403	1221.84	103.116	99.758	1017.5	29.5974	29.5296	17.6396
3292A_42	621.136	5.53492	1.7057	0.108558	5.83509	0.138874	0.388708	0.0738352	0.00318872	1010.67	41.1533	40.3358	1019.69	30.7802	30.7068	1036.97	88.4662	86.008	1017.98	30.8173	30.7438	1.66572
3292A_72	430.255	2.62766	1.91173	0.165863	5.94693	0.419299	0.500219	0.078883	0.00621766	1085.19	58.6797	57.0319	1001.93	68.7059	68.343	1169.2	160.18	152.242	1018.12	69.9965	69.6198	14.3063
3292A_107	21.517	2.15125	2.18642	0.45498	5.85778	0.254383	0.122019	0.076932	0.0082864	1176.73	150.419	140.042	1016.04	45.5976	45.4382	1119.43	222.698	207.681	1022.38	45.812	45.651	9.23589
3292A_88	348.705	2.86704	1.83658	0.121986	5.80504	0.11748	0.310338	0.0755793	0.00323313	1058.64	44.1424	43.2033	1024.57	28.105	28.0451	1083.95	86.9957	84.6109	1024.88	28.1324	28.0727	5.47757
3292A_12	265.03	13.455	1.73174	0.142119	5.80287	0.11648	0.246055	0.0727951	0.00365881	1020.4	53.5243	52.1498	1024.93	28.7749	28.7107	1008.25	103.658	100.303	1029.67	29.2854	29.2191	-1.65375
3292A_28	56.1341	2.21383	1.88129	0.247816	5.77175	0.181892	0.11812	0.0791978	0.00620806	1074.52	89.2654	85.5064	1030.04	37.0037	36.8964	1177.08	159.089	151.251	1036.64	40.5517	40.4258	12.4924
3292A_65	952.158	5.31187	1.75819	0.145255	5.85462	0.365161	0.463379	0.0774431	0.00564311	1030.18	54.1898	52.7812	1016.55	62.3566	62.0565	1132.62	148.594	141.751	1037.17	64.9869	64.6609	10.2485
3292A_38	255.457	1.45601	1.77154	0.11819	5.70579	0.138982	0.333872	0.0739724	0.00356365	1035.09	43.7685	42.845	1041.03	31.9249	31.845	1040.71	98.793	95.7361	1039.51	32.0453	31.9646	-0.0303637
3292A_109	282.241	3.67264	1.72615	0.127968	5.70521	0.123701	0.336057	0.0732981	0.00357012	1018.32	48.2314	47.1125	1041.13	29.3212	29.256	1022.21	100.183	97.045	1041.26	30.1319	30.0617	-1.8509
3292A_62	805.481	13.0153	1.69566	0.113424	5.71046	0.215664	0.286169	0.0738762	0.00414096	1006.9	43.1795	42.2804	1040.24	42.0798	41.9444	1038.09	115.297	111.156	1044.65	45.1172	44.9588	-0.207882
3292A_19	318.721	6.15774	1.80101	0.131378	5.69031	0.156626	0.398353	0.075565	0.00353813	1045.83	48.1923	47.0754	1043.64	34.4337	34.3419	1083.57	95.3538	92.4963	1047.13	35.5849	35.4855	3.68449
3292A_54	118.724	2.83475	1.91673	0.180765	5.75825	0.151413	0.194576	0.0799286	0.0047683	1086.93	63.9243	61.9732	1032.27	32.8233	32.7397	1195.22	120.001	115.483	1048.04	34.6251	34.5334	13.6341
3292A_35	27.5556	1.56042	1.67977	0.204569	5.59015	0.259788	0.202631	0.0768446	0.00705783	1000.89	79.0308	76.0699	1060.89	50.6305	50.4336	1117.16	188.936	178.017	1050.83	53.7853	53.562	5.03715
3292A_26	77.3399	4.85786	1.75305	0.157803	5.70372	0.152611	0.257209	0.0763022	0.0049409	1028.29	59.0515	57.3828	1041.38	33.7679	33.6796	1103.01	132.276	126.835	1052.76	36.3837	36.2813	5.58744
3292A_66	118.711	2.83461	1.95687	0.180674	5.70531	0.149638	0.203359	0.0796876	0.00466357	1100.81	63.0107	61.1141	1041.11	32.6731	32.5907	1189.27	117.779	113.425	1053.03	34.3481	34.2569	12.4577
3292A_56	330.842	7.5868	1.92771	0.131238	5.60863	0.126067	0.339326	0.0780731	0.00334116	1090.74	46.0336	45.0133	1057.66	30.7914	30.718	1148.73	86.1931	83.8436	1065.59	31.6664	31.5886	7.92795
3292A_59	453.04	4.36334	1.93179	0.136051	5.65559	0.121178	0.308996	0.0814458	0.00375404	1092.16	47.6748	46.5811	1049.56	29.8352	29.7651	1232.22	91.8045	89.1321	1065.72	30.459	30.386	14.8239
3292A_25	140.919	3.10529	2.03254	0.183036	5.47327	0.158605	0.159497	0.0760775	0.00544821	1126.47	62.2295	60.3793	1081.74	36.6958	36.5919	1097.11	146.757	140.091	1090.3	36.8906	36.7853	1.40095
3292A_51	35.9045	45.3196	2.00493	0.249241	5.44052	0.133091	0.195253	0.0793611	0.0061296	1117.18	86.016	82.5205	1087.73	33.0792	32.9931	1181.15	156.6	148.999	1113.92	34.0612	33.9725	7.90921
3292A_95	109.264	3.13462	2.17434	0.208667	5.23543	0.104991	0.258812	0.0803219	0.00424641	1172.87	67.8683	65.6732	1126.82	30.4688	30.3984	1204.9	105.955	102.415	1122.74	30.9231	30.8492	6.48011
3292A_87	633.46	5.22053	2.09852	0.138361	5.16219	0.108728	0.285164	0.0785803	0.0034591	1148.32	45.8546	44.8419	1141.47	31.6488	31.5716	1161.58	88.5274	86.0485	1146.25	31.7249	31.6468	1.73109
3292A_23	82.587	2.51281	1.98592	0.212586	5.52781	0.202974	0.30307	0.0873501	0.00606072	1110.74	73.6094	71.0345	1071.91	42.6948	42.5537	1368.23	136.579	130.704	1148.46	50.5488	50.3503	21.6573
3292A_18	413.905	9.92305	2.65059	0.187896	4.87888	0.108667	0.299462	0.0918959	0.00403792	1314.81	52.946	51.6005	1201.94	34.9426	34.8484	1465.24	84.639	82.3343	1221.13	38.1544	38.0421	17.9697
3292A_98	73.2577	2.13553	2.48005	0.226133	4.67878	0.132006	0.308716	0.0873885	0.00515732	1266.23	67.0749	64.9303	1248.66	40.3401	40.2144	1369.07	115.762	111.515	1249.35	45.6424	45.48	8.79492
3292A_14	18.5031	2.42693	2.90413	0.499489	4.65527	0.16361	0.122034	0.084315	0.00905152	1382.99	134.248	125.921	1254.39	47.8122	47.6367	1299.83	216.096	201.795	1267.99	48.8492	48.6648	3.49569
3292A_99	26.9052	1.32204	2.63568	0.316154	4.86224	0.148366	0.146539	0.0903883	0.00610874	1310.65	90.2734	86.4309	1205.69	41.1142	40.9836	1433.75	131.748	126.255	1272.99	47.8945	47.7184	15.9064
3292A_17	106.499	2.24124	2.31772	0.224481	4.56048	0.110591	0.24958	0.0856851	0.00476747	1217.73	69.8911	67.5653	1278.04	38.5938	38.4796	1331.09	109.604	105.796	1284.8	38.7199	38.6039	3.98501
3292A_60	67.1993	2.1317	2.78016	0.347652	4.52461	0.158276	0.222251	0.0892793	0.00648093	1350.22	95.5974	91.299	1287.23	48.3521	48.1727	1410.16	142.207	135.836	1299.81	49.4582	49.2691	8.71753
3292A_40	134.277	4.46344	2.67738	0.20749	4.46309	0.116974	0.288664	0.0883886	0.00462183	1322.23	58.115	56.4979	1303.29	40.8293	40.6992	1390.94	102.032	98.7141	1318.69	41.8275	41.6923	6.30176
3292A_37	325.425	3.96248	2.94602	0.190775	4.35028	0.0881011	0.308391	0.0909927	0.00414477	1393.82	49.6927	48.5059	1333.82	36.5513	36.4477	1446.45	88.0121	85.525	1329.35	38.0476	37.9346	7.78678
3292A_34	211.921	3.94145	2.80678	0.190224	4.3459	0.112577	0.408117	0.0888944	0.00390142	1357.35	51.383	50.115	1335.03	41.5033	41.3702	1401.89	85.2764	82.9448	1349.27	42.3021	42.164	4.76879
3292A_93	248.085	2.78216	3.13028	0.223959	4.25656	0.0920715	0.28369	0.096641	0.00474708	1440.16	55.8179	54.3247	1360.29	37.5257	37.4156	1560.26	93.5719	90.7499	1362.49	38.3827	38.2686	12.8164
3292A_27	159.118	2.43176	3.04093	0.257229	4.26617	0.126822	0.325496	0.0948595	0.00492539	1417.96	65.686	63.6278	1357.53	45.8422	45.68	1525.29	99.4618	96.2848	1366.56	46.669	46.5006	10.9982
3292A_47	178.725	4.64836	2.77319	0.226665	4.76622	0.138307	0.36419	0.103656	0.00551773	1348.35	61.9315	60.0986	1227.8	40.9184	40.7877	1690.59	99.8235	96.598	1378.96	58.7155	58.4506	27.3741
3292A_74	120.806	2.49466	2.8101	0.37451	4.19081	0.397094	0.500879	0.0872386	0.00942385	1358.23	102.342	97.431	1379.51	121.353	120.222	1365.77	215.453	201.188	1387.94	126.213	124.989	-1.00559
3292A_36	148.12	3.63077	3.38796	0.276968	4.14298	0.0721022	0.236511	0.0945326	0.00457436	1501.61	65.1242	63.1004	1393.83	35.7488	35.649	1518.78	92.6688	89.9058	1397.31	36.371	36.2689	8.2272
3292A_68	147.143	3.63487	3.4545	0.277161	4.14612	0.0719754	0.263327	0.0964169	0.00448781	1516.9	64.1812	62.2146	1392.88	35.0341	34.9378	1555.91	88.6454	86.109	1401.04	36.1554	36.0543	10.4782
3292A_29	171.491	1.60984	3.04529	0.277978	4.12779	0.0974362	0.315072	0.0956744	0.00561527	1419.05	71.0005	68.6016	1398.44	41.1958	41.0633	1541.39	112.429	108.383	1407.29	42.4294	42.2904	9.27399
3292A_55	144.642	14.3489	3.45438	0.289513	3.845	0.11565	0.38911	0.100418	0.00495204	1516.87	67.0912	64.9452	1490.24	49.7728	49.5802	1631.84	93.0667	90.2647	1496.33	51.4958	51.2923	8.6772
3292A_2	119.506	1.45171	3.67562	0.405276	3.73384	0.146105	0.214201	0.0970939	0.00583922	1566.09	89.976	86.1582	1529.73	61.7493	61.4549	1569.03	114.834	110.611	1531.31	61.7961	61.5016	2.50448
3292A_13	293.069	6.7216	3.65171	0.284429	3.79352	0.101069	0.174102	0.102478	0.00578993	1560.88	63.0545	61.1557	1508.27	47.199	47.0282	1669.48	106.35	102.7	1634	109.034	105.208	9.65608
3292A_108	318.994	5.62703	3.71948	0.230243	3.66807	0.0708264	0.327679	0.102791	0.00424244	1575.57	50.1505	48.9417	1554.1	39.8781	39.7541	1675.13	77.2583	75.3132	1636.49	79.8551	77.7829	7.225
3292A_10	309.577	3.5899	3.64542	0.275355	3.70129	0.107538	0.360891	0.102607	0.00520761	1559.51	61.096	59.3117	1541.7	50.6895	50.4897	1671.81	95.3309	92.3876	1654.08	96.9766	93.9349	7.78271
3292A_8	230.088	6.72858	4.29056	0.353621	3.42335	0.0695893	0.280075	0.10561	0.00511697	1691.55	69.0282	66.7587	1652.07	44.5267	44.3732	1724.95	90.3272	87.6732	1666.28	94.43	91.5416	4.22521
3292A_81	54.8641	1.4007	4.11348	0.466935	3.56111	0.0925903	0.293712	0.106598	0.00657236	1656.98	94.9024	90.6647	1595.45	47.9899	47.812	1742.04	115.174	110.89	1704.21	116.45	112.081	8.41529
3292A_4	256.344	3.75704	4.46518	0.330386	3.4054	0.0968622	0.362764	0.106194	0.00524593	1724.53	62.3297	60.4733	1659.75	53.3653	53.1455	1735.08	92.0034	89.2508	1715.01	94.6375	91.7302	4.34153
3292A_70	339.135	11.6325	4.04314	0.529284	3.92246	0.404679	0.548646	0.110139	0.0117262	1642.92	109.464	103.864	1463.91	138.884	137.406	1801.7	200.242	187.604	1726.15	208.792	195.136	18.7482
3292A_46	368.262	5.72975	4.26952	0.298157	3.42326	0.0931025	0.390747	0.108988	0.00496408	1687.51	58.28	56.6542	1652.11	51.2885	51.0843	1782.58	84.2225	81.9044	1749.17	85.5189	83.1338	7.31885
3292A_1	131.254	1.58029	4.66512	0.494631	3.21945	0.103513	0.170404	0.109811	0.00702178	1761.01	90.6482	86.7741	1743.72	60.2739	59.9924	1796.27	118.725	114.167	1763.18	119.997	115.35	2.92551
3292A_31	64.768	5.34533	5.4171	0.593315	3.07687	0.0474	0.188504	0.111143	0.00631219	1887.56	96.1201	91.7752	1814.13	43.3541	43.2101	1818.18	104.925	101.346	1803.81	109.602	105.705	0.223135
3292A_15	133.613	1.15688	5.31348	0.485232	3.10347	0.0766885	0.278426	0.111995	0.00570744	1871.03	79.5778	76.5765	1800.56	52.8731	52.6581	1832.04	93.8183	90.9444	1810.67	99.8894	96.641	1.71841
3292A_49	80.5654	2.40031	4.69793	0.392459	3.29657	0.0648205	0.239286	0.117204	0.00578163	1766.87	71.1697	68.7596	1707.88	44.554	44.3992	1914.02	89.8684	87.2182	1834.85	96.2612	93.238	10.77
3292A_82	119.721	9.48964	5.65806	0.681887	2.92481	0.0593535	0.335444	0.119595	0.00533509	1924.99	106.748	101.416	1895.82	48.9247	48.7384	1950.18	80.8014	78.6492	1920.99	81.836	79.6321	2.78739
3292A_92	107.09	1.97481	11.2172	0.971655	2.18845	0.0433996	0.254471	0.173292	0.00826593	2541.35	82.4043	79.1908	2426.05	61.0982	60.8103	2589.7	80.7103	78.5046	2537.11	84.9581	82.5227	6.3192
3292A_67	221.006	16.3777	11.4726	1.54398	2.26167	0.230722	0.479397	0.174894	0.0183139	2562.35	129.753	121.958	2360.27	207.925	204.625	2605.04	179.978	169.358	2549.15	181.666	170.875	9.3961
3292A_79	209.617	18.4814	11.5391	0.898824	2.11716	0.050153	0.34627	0.174861	0.00767447	2567.75	74.121	71.5102	2493.78	66.8618	66.5166	2604.73	74.0699	72.2071	2563.34	75.9781	74.022	4.2596
3292A_16	210.189	18.5855	11.6569	0.878183	2.10633	0.0497698	0.363798	0.173628	0.00738443	2577.24	71.7022	69.2571	2504.4	66.2222	65.885	2592.92	71.8308	70.0785	2569.84	72.5732	70.786	3.41398
3292A_106	210.189	18.5855	11.6569	0.878183	2.10633	0.0497698	0.363798	0.173628	0.00738443	2577.24	71.7022	69.2571	2504.4	66.2222	65.885	2592.92	71.8308	70.0785	2569.84	72.5732	70.786	3.41398
3292A_85	107.273	1.96471	11.6524	0.973907	2.17969	0.0433432	0.315919	0.177064	0.00790936	2576.89	79.7018	76.6915	2434.18	59.7966	59.5202	2625.56	75.2532	73.3292	2571.51	80.7746	78.567	7.28923
3292A_24	67.3388	1.37831	11.2074	0.932495	2.1946	0.0519637	0.276399	0.177433	0.00786028	2540.53	79.083	76.1185	2420.39	64.9356	64.6115	2629.02	74.5976	72.7066	2592.64	77.2232	75.2017	7.93581
3292A_45	68.0156	1.37523	10.9716	0.935577	2.21003	0.0524598	0.265103	0.177063	0.00811213	2520.73	80.9438	77.8406	2406.28	65.4824	65.1506	2625.55	77.2091	75.185	2593.61	79.1547	77.0323	8.3515
3292A_6	76.0787	2.77041	11.8587	1.18903	2.07076	0.0578572	0.35298	0.179465	0.00876027	2593.31	96.1317	91.7858	2539.95	75.8359	75.391	2647.94	82.1579	79.8677	2615.15	82.9176	80.5893	4.07804
3292A_102	94.6696	1.51194	11.9543	0.991175	2.14649	0.0566629	0.466573	0.187004	0.00791544	2600.83	79.2153	76.2414	2465.46	69.9079	69.5299	2715.99	70.6477	68.944	2650.02	76.212	74.2375	9.22447
3292A_89	152.412	2.6602	12.9902	0.796039	2.03781	0.0282842	0.332474	0.184505	0.00726781	2678.95	58.6127	56.9684	2573.8	54.6662	54.4356	2693.78	65.827	64.3464	2667.1	66.758	65.2374	4.45407
3292A_76	167.209	2.19324	9.7961	0.717411	2.42765	0.0676601	0.46946	0.185367	0.00806519	2415.78	68.6194	66.3765	2223.7	66.8467	66.5028	2701.49	72.7448	70.9401	2682.97	84.4248	82.006	17.6861
3292A_44	55.6004	3.13814	13.9026	1.27042	1.98067	0.0545367	0.369403	0.193624	0.00913313	2743.09	88.4585	84.7653	2634.73	76.7873	76.3331	2773.19	78.4236	76.3245	2739.86	79.5833	77.4261	4.99277
3292A_52	94.9312	4.07148	12.9344	1.22503	1.93941	0.0427432	0.28341	0.195404	0.00985127	2674.88	91.2878	87.3602	2680.58	68.7097	68.3442	2788.19	83.7839	81.3913	2744.48	85.2289	82.7586	3.85946
3292A_5	63.6977	2.94256	13.1624	1.23929	1.95199	0.0644452	0.429037	0.197391	0.0101134	2691.37	90.854	86.9624	2666.44	87.8075	87.2118	2804.75	85.0384	82.574	2750.61	89.4138	86.6984	4.93132
3292A_30	279.897	12.7953	13.9534	0.971518	2.04817	0.0356481	0.298306	0.200046	0.0084225	2746.55	67.0642	64.9204	2563.06	60.5431	60.2599	2826.57	69.5557	67.8964	2796.79	73.774	71.9117	9.32266
16051803 (329-03) targetted, Lough Mask Formation
3293A_1	546.662	1.45705	0.523333	0.0488513	14.5795	0.620792	0.422844	0.0572192	0.004191	427.376	32.8259	32.3037	427.651	24.6471	24.6001	499.992	165.495	157.35	421.063	26.5376	26.4832	14.4684
3293A_2	1458.72	1.25025	1.69462	0.154003	5.88467	0.226104	0.473012	0.0749369	0.00469736	1006.51	58.8765	57.2176	1011.74	51.6636	51.4561	1066.81	128.661	123.517	1007.16	52.0344	51.8239	5.16175
3293A_3	194.33	1.58775	0.500637	0.0542595	14.9859	0.448303	0.261385	0.0572491	0.00516841	412.134	37.0498	36.3858	416.421	19.1235	19.0967	501.141	205.199	192.82	406.455	19.234	19.2054	16.9055
3293A_4	542.525	2.84297	2.50932	0.214463	4.69856	0.122893	0.375246	0.0889145	0.00540102	1274.73	63.0202	61.1232	1243.88	52.9333	52.7169	1402.32	118.667	114.2	1281.25	56.406	56.1604	11.2981
3293A_5	742.499	0.873588	4.47586	0.365315	3.37424	0.123996	0.498936	0.110496	0.0065243	1726.51	68.8957	66.6348	1673.25	79.6367	79.1491	1807.59	109.306	105.429	1770.02	111.438	107.418	7.4321
3293A_6	597.663	2.01975	1.89003	0.149069	5.65357	0.127219	0.418605	0.0813049	0.00460987	1077.59	53.0612	51.7101	1049.9	43.3702	43.225	1228.82	113.38	109.332	1046.52	43.8912	43.7425	14.5602
3293A_7	671.423	2.18092	2.93256	0.285479	4.61578	0.195151	0.397719	0.0968144	0.00702111	1390.36	75.0812	72.404	1264.14	66.1509	65.8131	1563.63	139.129	132.978	1330.69	77.8588	77.3901	19.1534
3293A_8	159.75	0.718479	0.683983	0.093352	14.5133	0.709105	0.359779	0.0647199	0.00537902	529.179	57.0827	55.5222	429.539	25.438	25.388	765.243	180.175	170.41	441.798	32.2794	32.1987	43.8689
3293A_9	332.294	2.38494	1.77075	0.187306	6.01778	0.438634	0.611676	0.083452	0.0069246	1034.8	69.8279	67.5064	990.998	75.7744	75.3329	1279.81	166.149	157.574	1048.34	90.3356	89.706	22.5667
3293A_10	166.588	4.17573	2.3549	0.262167	4.90581	0.357875	0.452819	0.0859984	0.00775872	1229.04	80.9383	77.8356	1195.91	89.9065	89.2854	1338.15	179.579	169.574	1184.57	89.4306	88.8133	10.629
3293A_11	2977.95	1.56356	2.97337	0.233771	4.63571	0.221141	0.457674	0.0961651	0.00614733	1400.84	60.636	58.8777	1259.2	71.259	70.8684	1551	122.503	117.713	1309.71	78.3898	77.9146	18.8135
3293A_12	750.554	1.76295	3.25216	0.281515	3.95078	0.126805	0.515855	0.0937548	0.00519006	1469.69	68.3614	66.1351	1454.52	66.2339	65.8932	1503.18	106.475	102.846	1476.85	68.9064	68.5403	3.23714
3293A_13	349.955	2.08208	2.37939	0.220266	5.07624	0.208958	0.404156	0.0836942	0.00614944	1236.43	67.2841	65.1263	1159.16	59.8241	59.5478	1285.45	146.54	139.827	1149.8	60.2809	59.9988	9.82461
3293A_14	364.079	3.01212	1.39896	0.134076	7.05114	0.212771	0.3688	0.07551	0.0049882	888.495	57.5572	55.9706	854.952	38.9421	38.8247	1082.11	135.429	129.737	850.146	39.3697	39.2498	20.992
3293A_15	725.143	1.39895	3.25731	0.282881	4.11617	0.164466	0.511245	0.092552	0.00566823	1470.92	68.6145	66.3714	1401.99	70.7629	70.3767	1478.74	118.411	113.946	1394.11	71.3639	70.971	5.19037
3293A_16	275.946	0.939	1.37755	0.119925	6.85171	0.194275	0.317368	0.0705119	0.00500978	879.395	51.8736	50.5814	878.215	38.9616	38.8455	943.298	149.058	142.244	863.799	38.9627	38.8439	6.89947
3293A_17	873.11	1.84356	2.02851	0.15784	5.42343	0.145363	0.40423	0.0798629	0.00459375	1125.12	53.6213	52.242	1090.89	47.6959	47.52	1193.61	115.649	111.448	1092.45	48.769	48.5851	8.60569
3293A_18	205.686	1.45061	1.46545	0.142882	6.6764	0.17642	0.281256	0.0705956	0.00556016	916.254	59.7151	58.0089	899.738	38.6948	38.5776	945.727	165.611	157.24	892.912	39.1372	39.0174	4.8629
3293A_19	540.691	2.24784	1.60966	0.153201	6.28878	0.219007	0.381428	0.0743793	0.00499488	973.977	60.5009	58.7505	951.291	46.0241	45.8604	1051.78	138.359	132.433	942.661	47.4972	47.3215	9.55393
3293A_20	811.111	1.26375	0.54138	0.0474603	14.8722	0.385198	0.286256	0.0625269	0.00431753	439.334	31.5075	31.0264	419.504	18.761	18.7338	692.179	150.768	143.899	419.521	20.1355	20.1041	39.3937
3293A_21	754.028	2.51059	1.58797	0.137349	6.3508	0.196598	0.450254	0.0771584	0.00450237	965.501	54.6164	53.186	942.648	43.6235	43.4778	1125.29	118.547	114.153	933.91	43.608	43.4598	16.2303
3293A_22	162.757	1.26125	3.79533	0.416332	3.69395	0.118279	0.309085	0.100861	0.00675076	1591.76	90.1262	86.296	1544.42	68.4609	68.1006	1640.01	126.891	121.736	1607.65	132.663	127.048	5.82852
3293A_23	1812.24	3.34921	1.65836	0.119711	6.26727	0.128387	0.48049	0.0757078	0.00387231	992.749	46.2473	45.2177	954.327	39.6377	39.5162	1087.35	104.254	100.847	948.451	39.8561	39.7334	12.2339
3293A_24	989.203	2.18826	5.28401	0.409462	3.31624	0.0775229	0.427296	0.119822	0.0064751	1866.28	67.2635	65.1068	1698.97	68.9859	68.6188	1953.57	98.1281	94.9714	1913.16	102.555	99.1183	13.0325
3293A_25	451.705	1.42128	3.32527	0.317796	4.13494	0.138155	0.344139	0.0949397	0.00614325	1487	76.0095	73.2667	1396.26	64.4745	64.1538	1526.88	124.434	119.501	1394.22	66.6802	66.337	8.55432
3293A_26	619.004	1.59397	1.71013	0.144341	6.44539	0.220677	0.419513	0.0768293	0.00454707	1012.33	54.8123	53.3714	929.766	44.8124	44.6558	1116.76	120.424	115.894	925.111	47.6844	47.5086	16.7446
3293A_27	900.108	1.53275	3.03778	0.238166	4.0708	0.139529	0.458539	0.0934779	0.00544283	1417.16	60.7926	59.0259	1416.01	66.6282	66.2856	1497.59	112.18	108.16	1410.64	69.0039	68.6379	5.44703
3293A_28	1791.32	2.14929	1.89844	0.1629	5.64377	0.180054	0.391816	0.0821952	0.00520607	1080.54	57.8845	56.2802	1051.59	49.5685	49.3802	1250.17	126.542	121.514	1044.92	51.1603	50.9581	15.8848
3293A_29	464.988	1.9881	0.709129	0.0581152	13.6622	0.395174	0.331247	0.0708631	0.00450836	544.229	34.8227	34.2358	455.374	20.9274	20.8935	953.467	132.925	127.476	462.846	27.8597	27.7996	52.2401
3293A_30	215.867	1.99436	1.58646	0.150529	6.64986	0.244651	0.414361	0.0722765	0.0051826	964.907	59.9711	58.2505	903.089	44.4676	44.3161	993.738	149.29	142.436	899.591	44.9828	44.825	9.12203
3293A_31	248.41	0.831412	1.70507	0.156605	6.43708	0.15072	0.364083	0.0768258	0.00469107	1010.43	59.6513	57.9494	930.884	38.7069	38.5909	1116.67	124.323	119.501	924.61	39.2922	39.1741	16.6377
3293A_32	2526.55	1.38724	3.2285	0.274687	4.09715	0.155833	0.506281	0.0964946	0.00570963	1464.03	67.0551	64.9112	1407.83	69.8242	69.4492	1557.42	113.122	109.024	1430.91	74.0068	73.5844	9.60486
3293A_33	564.607	1.74507	1.62397	0.147659	6.27046	0.19605	0.407898	0.0745146	0.00492982	979.528	57.9579	56.3496	953.876	44.0915	43.9412	1055.44	136.188	130.441	939.592	45.12	44.9639	9.62268
3293A_34	499.157	1.71488	4.07498	0.350365	3.59532	0.0683078	0.421685	0.104091	0.00601554	1649.31	71.3384	68.917	1581.98	60.9319	60.6452	1698.3	108.424	104.628	1656.13	112.111	108.065	6.84913
3293A_35	301.002	0.361394	11.8074	1.08252	2.12008	0.0751271	0.43557	0.189705	0.0112771	2589.25	87.6896	84.059	2490.93	109.723	108.796	2739.61	99.5011	96.1514	2693.66	111.62	107.428	9.07721
3293A_36	540.331	1.44294	0.547511	0.0479949	14.2028	0.60475	0.420943	0.0580236	0.00407235	443.365	31.738	31.2496	438.616	24.1434	24.0968	530.654	157.567	150.151	438.32	25.5674	25.5153	17.3442
3293A_37	515.382	1.23564	3.55404	0.294222	3.9142	0.116043	0.463889	0.102949	0.00609325	1539.34	66.6835	64.5634	1466.68	64.2388	63.9189	1677.96	111.383	107.384	1463.43	65.4959	65.1662	12.5915
3293A_38	512.38	0.746529	0.587383	0.0523602	13.9574	0.556391	0.265774	0.063649	0.00494925	469.195	33.772	33.2195	446.068	23.6931	23.6496	729.989	169.233	160.608	447.598	25.986	25.9323	38.8939
3293A_39	286.745	1.13121	1.77588	0.180653	6.02982	0.132184	0.274857	0.0760531	0.00625866	1036.67	67.1794	65.0281	989.163	40.1814	40.0566	1096.47	169.267	160.46	980.415	40.8293	40.6992	9.78655
3293A_40	348.869	1.64753	3.09582	0.304347	4.48013	0.114187	0.433981	0.0940483	0.00563606	1431.66	76.8874	74.0822	1298.8	54.1601	53.9324	1509.08	115.342	111.094	1327.14	58.669	58.4007	13.9344
3293A_41	847.992	0.939324	0.649726	0.0604381	14.4199	0.596919	0.457468	0.0643658	0.00471559	508.31	37.5437	36.8621	432.23	23.7728	23.7305	753.673	158.577	150.969	440.653	27.1978	27.142	42.6502
3293A_42	434.182	2.02359	3.01934	0.226785	4.25308	0.123175	0.403073	0.0963115	0.00563076	1412.52	58.1152	56.498	1361.3	60.0696	59.791	1553.86	111.799	107.795	1359.93	61.4042	61.1117	12.3924
3293A_43	308.82	3.21846	3.39525	0.332417	4.10985	0.175514	0.536361	0.0993182	0.00607937	1503.3	78.2839	75.3784	1403.92	73.1582	72.7466	1611.35	116.268	111.932	1418.62	78.8594	78.3786	12.8727
3293A_44	257.521	3.23694	1.56804	0.149782	6.59806	0.153604	0.356146	0.0738856	0.00509054	957.653	60.1029	58.3755	909.701	38.1464	38.0338	1038.35	142.327	136.069	912.03	38.7441	38.628	12.3894
3293A_45	1017	4.10003	1.65671	0.126312	6.14212	0.153503	0.496888	0.0740118	0.00387129	992.12	48.8592	47.7113	972.375	42.4213	42.2821	1041.79	107.395	103.793	1001.92	45.7242	45.5626	6.66287
3293A_46	73.2329	1.34445	2.08907	0.248109	5.21783	0.215758	0.307133	0.0780363	0.00730556	1145.22	83.2365	79.9587	1130.31	58.0408	57.7806	1147.8	191.812	180.55	1114.72	58.2724	58.0117	1.52361
3293A_47	399.782	0.957508	11.5597	0.934729	2.12805	0.0615829	0.403075	0.181737	0.0107092	2569.42	77.0096	74.1953	2483.18	102.119	101.316	2668.79	99.2801	95.9532	2642.24	103.047	99.4713	6.95455
3293A_48	815.923	1.07876	4.14786	0.321544	3.83877	0.0902064	0.532719	0.107265	0.00551905	1663.79	64.4341	62.4522	1492.4	61.9986	61.7006	1753.46	95.6673	92.6919	1681.77	104.056	100.557	14.8882
3293A_49	249.791	1.79216	1.65342	0.177281	6.51396	0.215092	0.35243	0.0769423	0.00587123	990.863	68.9987	66.7316	920.645	43.5123	43.3659	1119.69	156.089	148.561	912.69	45.9623	45.799	17.7772
3293A_50	139.304	0.937544	1.19396	0.10834	9.64847	0.284076	0.178727	0.0789421	0.00630879	797.793	50.7698	49.5314	635.725	29.1189	29.0533	1170.68	162.431	154.272	752.762	42.2678	42.1298	45.6962
3293A_51	259.595	1.03497	0.571014	0.0641571	13.7649	0.389231	0.280945	0.0563405	0.00496344	458.67	41.8954	41.0485	452.092	20.6309	20.5994	465.811	201.325	189.421	448.831	22.4651	22.426	2.94525
3293A_52	454.334	1.27345	0.561605	0.0517839	13.7662	0.433844	0.332986	0.0552796	0.0044621	452.57	33.953	33.3948	452.05	21.6658	21.6295	423.551	185.351	175.239	445.869	22.4294	22.3905	-6.72858
3293A_53	729.793	1.73812	2.35515	0.190815	5.02471	0.124032	0.519394	0.0817197	0.00443296	1229.12	58.5842	56.9415	1170.04	50.0348	49.8413	1238.81	108.231	104.534	1170.9	52.1588	51.9489	5.55147
3293A_54	217.963	2.27847	1.60934	0.190116	6.65308	0.230333	0.344677	0.0730809	0.00564737	973.852	75.3617	72.665	902.68	43.5052	43.3601	1016.2	160.634	152.716	892.323	43.7149	43.5658	11.1708
3293A_55	807.468	1.22889	3.03767	0.259233	4.39666	0.153295	0.447921	0.0921919	0.00583109	1417.14	66.2604	64.167	1321.1	63.433	63.1215	1471.34	122.493	117.722	1336.24	66.7666	66.4216	10.2115
3293A_56	1757.74	1.55698	1.81659	0.129094	5.80026	0.139664	0.487876	0.0737543	0.00393059	1051.45	47.08	46.0135	1025.35	44.5859	44.4308	1034.75	109.575	105.828	1012.25	44.6055	44.4504	0.908141
3293A_57	859.433	0.93628	0.630482	0.0623502	14.5015	0.600301	0.433815	0.0639879	0.0048823	496.396	39.2047	38.462	429.876	24.2165	24.1711	741.23	165.667	157.388	433.456	26.4031	26.3478	42.005
3293A_58	157.393	0.721322	0.64525	0.0906656	15.2627	0.745707	0.383522	0.0634376	0.00544266	505.551	56.7405	55.1982	409.103	25.2472	25.1964	722.934	187.472	176.949	417.281	30.9901	30.9173	43.4108
3293A_59	1065.21	3.39815	1.88773	0.153363	5.6317	0.211396	0.578407	0.0786962	0.00435826	1076.79	54.6545	53.2222	1053.66	53.2794	53.06	1164.5	111.746	107.825	1051.51	54.1416	53.9151	9.51805
3293A_60	448.476	2.17859	1.55798	0.147551	6.56487	0.358915	0.510327	0.0704383	0.00536306	953.665	59.4312	57.7413	913.989	57.2847	57.0314	941.159	160.068	152.237	905.837	57.0569	56.8055	2.88686
3293A_61	1101.22	4.67115	1.98397	0.152655	5.41946	0.166828	0.446672	0.0790229	0.00474034	1110.07	52.6211	51.2921	1091.62	50.6185	50.4203	1172.71	121.079	116.486	1095.75	51.6054	51.3994	6.91442
3293A_62	841.22	1.78987	1.49738	0.119414	6.55344	0.204751	0.49606	0.0750223	0.0043137	929.32	49.1413	47.9802	915.475	42.9866	42.8438	1069.1	117.772	113.447	911.874	44.0066	43.8583	14.3695
3293A_63	612.268	1.39653	0.524914	0.0564916	14.3613	0.681622	0.408788	0.0553394	0.00516367	428.429	37.9685	37.2714	433.936	25.6467	25.5958	425.963	215.153	201.645	429.197	25.8745	25.8227	-1.87183
3293A_64	569.563	2.51827	1.69449	0.151589	6.27843	0.294783	0.503951	0.0771317	0.00501873	1006.46	57.943	56.3356	952.75	54.179	53.9523	1124.6	132.499	127.033	943.263	54.399	54.1704	15.2807
3293A_65	781.697	1.43165	3.58441	0.335749	3.97242	0.255635	0.456797	0.0985236	0.00802146	1546.09	75.7592	73.0345	1447.42	98.4533	97.7071	1596.37	155.964	148.264	1417.73	105.254	104.403	9.33026
3293A_66	553.3	1.42376	15.7273	1.47001	1.90863	0.095917	0.485388	0.215815	0.0151107	2860.38	91.253	87.3279	2715.85	143.442	141.864	2949.73	115.351	110.838	2947.17	126.701	121.278	7.92873
3293A_67	355.585	1.93356	1.43525	0.161437	7.03796	0.372815	0.406759	0.0730948	0.0059565	903.741	68.4524	66.2201	856.451	52.6232	52.4106	1016.58	169.628	160.823	836.679	52.1997	51.9891	15.7518
3293A_68	1095.99	1.133	1.438	0.142092	6.69688	0.422949	0.47744	0.070517	0.00577771	904.889	60.0579	58.3327	897.169	62.6113	62.3073	943.447	172.532	163.467	887.214	63.6208	63.3096	4.9052
3293A_69	641.975	2.27886	3.23373	0.274949	4.19629	0.160288	0.469389	0.0967837	0.00606682	1465.28	67.0358	64.8936	1377.88	68.3845	68.0249	1563.03	119.886	115.291	1374.07	72.4646	72.0595	11.8454
3293A_70	317.555	2.2014	1.65083	0.156628	6.58827	0.350752	0.443464	0.0782592	0.00629731	989.869	60.8994	59.1263	910.961	55.9111	55.671	1153.46	164	155.695	911.971	60.2607	59.9804	21.0237
3293A_71	400.624	1.81343	3.18768	0.280057	4.25591	0.182066	0.514595	0.0925063	0.00546532	1454.18	69.0666	66.7948	1360.48	71.3125	70.9192	1477.8	114.164	110.007	1386.84	77.644	77.1794	7.93876
3293A_72	177.359	0.980135	0.592182	0.0646257	15.2894	0.625326	0.213502	0.0622678	0.00511659	472.26	41.6376	40.801	408.411	21.9374	21.9016	683.321	180.51	170.756	407.256	25.5522	25.5017	40.2315
3293A_73	428.715	1.32634	11.66	0.949757	2.34874	0.0826675	0.419649	0.179284	0.0112277	2577.49	77.6399	74.7804	2286.57	102.683	101.872	2646.25	105.856	102.085	2552.58	120.408	115.57	13.592
3293A_74	820.915	2.40707	2.15228	0.201553	5.3865	0.201234	0.415571	0.080494	0.00532746	1165.79	65.9828	63.9064	1097.76	55.0541	54.8214	1209.12	133.148	127.605	1109.06	58.1588	57.8975	9.20976
3293A_75	1473.82	2.3052	1.84146	0.133696	5.82005	0.137529	0.488968	0.0747833	0.00413759	1060.38	48.3468	47.2226	1022.13	44.0264	43.8779	1062.68	113.353	109.342	1010.07	44.0681	43.9193	3.8161
3293A_76	627.66	1.71489	1.75833	0.148931	6.68989	0.190233	0.475738	0.0805288	0.00487909	1030.23	55.5775	54.0968	898.044	40.6243	40.4952	1209.97	121.648	117.005	893.786	46.55	46.3826	25.7796
3293A_77	489.226	1.20572	1.59827	0.120915	6.48225	0.153726	0.448474	0.072112	0.00407481	969.535	47.8112	46.711	924.841	39.3602	39.2404	989.102	117.127	112.867	920.839	39.807	39.6832	6.49696
3293A_78	540.922	1.29024	0.616301	0.0789598	13.4969	0.656972	0.315351	0.0614452	0.00730594	487.527	50.2196	49.0074	460.755	27.592	27.5331	654.856	265.922	245.311	452.904	28.8949	28.8303	29.6401
3293A_79	635.635	2.05529	1.43597	0.124372	6.88211	0.291252	0.442109	0.0692953	0.00469529	904.043	52.515	51.1912	874.587	47.205	47.0314	907.542	142.796	136.543	866.957	47.0857	46.913	3.63126
3293A_80	320.557	3.02815	1.55148	0.1546	6.44657	0.280744	0.348541	0.0698736	0.00516196	951.082	62.4757	60.6111	929.608	50.4212	50.2234	924.642	155.595	148.192	913.982	50.5745	50.3756	-0.537051
3293A_81	729.391	2.45073	1.62371	0.143448	6.31844	0.294171	0.421091	0.0712832	0.00505138	979.428	56.2878	54.7695	947.139	53.9571	53.7323	965.547	148.143	141.402	942.476	53.9122	53.6877	1.90645
3293A_82	176.296	0.972574	0.581133	0.0657792	15.1604	0.620086	0.205951	0.0629264	0.00530516	465.189	42.6881	41.8092	411.777	22.5181	22.4803	705.746	184.651	174.443	408.878	27.1025	27.0457	41.6536
3293A_83	235.003	1.96147	2.6573	0.260936	4.48957	0.219216	0.3897	0.0881799	0.00691528	1316.67	73.7677	71.182	1296.33	73.5434	73.1277	1386.41	154.434	146.958	1291.61	73.4987	73.0822	6.49723
3293A_84	712.307	2.45426	1.72819	0.149897	6.22488	0.203344	0.403291	0.0777335	0.00503525	1019.08	56.5695	55.0365	960.364	45.9035	45.7393	1140.07	131.589	126.192	963.751	47.3059	47.133	15.7628
3293A_85	1621.25	5.65245	2.01658	0.159371	5.63049	0.200159	0.48966	0.0781457	0.00468779	1121.11	54.3658	52.948	1053.87	52.4783	52.2641	1150.58	121.478	116.861	1042.51	52.5459	52.3342	8.40498
3293A_86	1879.54	2.54493	1.59554	0.14118	6.36251	0.30367	0.420908	0.0742209	0.00539111	968.466	55.995	54.4925	941.034	54.9527	54.7208	1047.48	150.03	143.089	936.3	54.8623	54.6298	10.1622
3293A_87	224.609	2.43534	1.64556	0.14953	6.95887	0.208539	0.405747	0.0761723	0.0050815	987.847	58.2174	56.5945	865.56	39.5748	39.4536	1099.6	136.432	130.652	853.262	39.6086	39.4859	21.2843
3293A_88	232.105	1.21202	1.70115	0.176834	6.03843	0.161728	0.328929	0.0745386	0.00528594	1008.96	67.5857	65.4086	987.855	43.1872	43.043	1056.09	146.198	139.596	987.665	43.5483	43.4018	6.4609
3293A_89	916.066	1.30647	0.610998	0.0496984	14.3444	0.635368	0.492593	0.0613363	0.00392405	484.19	31.5681	31.085	434.431	24.8544	24.8066	651.049	140.402	134.441	437.806	29.5932	29.5254	33.2721
3293A_90	199.098	0.66496	3.8357	0.429865	3.9231	0.12573	0.352999	0.106708	0.00728627	1600.27	92.3288	88.3131	1463.7	66.3071	65.9664	1743.93	127.79	122.538	1476.74	70.2902	69.9091	16.0691
3293A_91	56.5664	0.952135	1.52631	0.205397	6.38524	0.320009	0.20558	0.0759815	0.00746822	941.014	84.2788	80.92	937.917	54.7004	54.468	1094.58	203.331	190.755	918.378	57.389	57.1345	14.3129
3293A_92	451.881	0.896823	1.48624	0.1336	7.00694	0.232384	0.311147	0.0693847	0.00541355	924.783	55.3088	53.8422	860	41.3954	41.2641	910.199	164.938	156.651	855.944	41.3701	41.2378	5.51513
3293A_93	437.114	6.64721	9.72796	0.757494	2.66723	0.120056	0.573276	0.177715	0.0108383	2409.36	72.9916	70.459	2052.51	106.133	105.267	2631.66	103.181	99.5972	2501.66	138.292	131.961	22.007
3293A_94	928.218	2.51247	1.59185	0.123097	6.40173	0.223726	0.500959	0.0745278	0.00432102	967.022	48.8062	47.661	935.669	46.1853	46.0192	1055.8	119.014	114.602	929.144	46.347	46.1811	11.3779
3293A_95	269.2	1.08252	3.10821	0.262203	4.18885	0.170235	0.457954	0.0910198	0.00590484	1434.72	65.8623	63.7935	1380.09	70.2532	69.874	1447.02	126.125	121.079	1368.96	70.375	69.9931	4.62545
3293A_96	1682.34	2.44771	1.82047	0.126842	5.72825	0.139471	0.527126	0.0744045	0.00377739	1052.85	46.1847	45.1579	1037.26	45.2782	45.1195	1052.46	104.015	100.63	1032.32	45.326	45.1686	1.44414
3293A_97	251.24	1.69173	1.25053	0.111629	6.96402	0.231378	0.425622	0.0656502	0.00426589	823.646	50.9992	49.7497	864.961	41.2083	41.0758	795.242	139.295	133.376	864.832	42.2367	42.0987	-8.76694
3293A_98	3444.7	8.00865	1.83397	0.134084	5.7055	0.212115	0.559553	0.0756583	0.00432789	1057.7	48.6182	47.4813	1041.08	52.9924	52.7767	1086.04	116.855	112.591	1034.83	53.4185	53.198	4.14017
3293A_99	285.671	1.43296	3.77906	0.343473	3.86011	0.0958556	0.369024	0.10069	0.00625285	1588.31	74.3195	71.6955	1485.03	61.6268	61.3337	1636.87	117.597	113.157	1484.47	62.9191	62.6134	9.27613
3293A_100	590.793	3.18599	1.52897	0.122825	6.59217	0.193212	0.429853	0.0697269	0.00439375	942.085	49.9228	48.7249	910.459	41.6478	41.5149	920.321	132.316	126.925	901.893	42.2569	42.1189	1.07164
3293A_101	1178.56	1.09631	3.85342	0.330515	3.60433	0.205597	0.419182	0.102517	0.00766394	1603.98	70.3516	67.9959	1578.48	98.352	97.6073	1670.19	141.528	135.136	1628.47	155.322	147.672	5.49094
3293A_102	1173.67	1.99672	1.63932	0.157378	6.26636	0.374348	0.464758	0.0747153	0.00585699	985.449	61.4666	59.6603	954.455	63.922	63.6066	1060.85	161.901	153.841	948.933	63.7702	63.4551	10.0296
3293A_103	351.913	1.60586	0.555268	0.0467223	14.1558	0.481619	0.252498	0.0562941	0.0041962	448.442	30.7347	30.2767	440.024	21.7581	21.7214	463.986	169.567	161.045	430.84	22.3435	22.3035	5.16435
3293A_104	2031.19	1.64745	1.61615	0.118891	6.21176	0.223906	0.513965	0.0743928	0.00420249	976.496	46.6764	45.6276	962.249	48.5673	48.3838	1052.14	115.966	111.774	981.585	51.8546	51.647	8.54381
3293A_105	378.642	0.594432	0.973829	0.0959685	11.8873	0.419397	0.28932	0.0808267	0.00669659	690.435	49.9785	48.7778	520.688	26.1318	26.0774	1217.23	167.407	158.733	520.949	33.5705	33.4834	57.2236
3293A_106	495.854	0.739156	0.562006	0.0532227	14.3133	0.570578	0.26921	0.0628411	0.00505876	452.831	34.8956	34.3062	435.343	24.3083	24.2639	702.857	176.162	166.85	429.435	27.3678	27.3097	38.0609
3293A_107	298.341	1.63943	1.73895	0.13352	6.18911	0.221428	0.457343	0.0786779	0.00477297	1023.08	50.1115	48.9047	965.519	47.3819	47.2084	1164.04	122.631	117.925	1011.53	51.9937	51.7849	17.0547
3293A_108	1274.45	0.816177	0.542518	0.04687	14.1095	0.697635	0.422621	0.0577323	0.004031	440.084	31.0897	30.6206	441.42	26.999	26.9411	519.619	157.033	149.672	443.358	27.901	27.8394	15.0493
3293A_109	821.616	1.257	0.513541	0.0483114	15.4876	0.401137	0.343295	0.0614019	0.00442796	420.827	32.672	32.1546	403.345	19.2853	19.2579	653.341	158.655	151.084	402.03	19.9501	19.9193	38.2642
3293A_110	610.608	1.39465	0.512787	0.0575575	14.3226	0.679788	0.391951	0.0557595	0.0053105	420.321	39.0047	38.2696	435.068	26.1993	26.1476	442.805	219.102	205.096	430.199	26.709	26.6551	1.74707
16051803 (329-03) random, Lough Mask Formation
3293A_63	125.465	1.1723	0.464339	0.0500193	14.5084	0.343925	0.178122	0.0537152	0.00477828	387.271	34.9833	34.391	429.681	12.9298	12.9154	359.129	207.255	194.743	430.865	15.2704	15.2508	-19.6454
3293A_75	124.644	1.17019	0.468635	0.0510145	14.5212	0.345098	0.177953	0.0539387	0.00483627	390.246	35.5802	34.9676	429.314	13.0299	13.0167	368.491	208.604	195.926	433.099	15.1773	15.158	-16.5059
3293A_15	112.857	1.23659	0.473595	0.0570873	14.0855	1.17616	0.383368	0.0515028	0.00550832	393.669	39.7221	38.9599	442.148	36.8534	36.7483	263.396	255.277	236.666	442.063	43.9496	43.8002	-67.8642
3293A_97	180.282	1.48318	0.583726	0.0452826	13.6473	0.297301	0.20183	0.0587998	0.0037114	466.853	29.2417	28.8269	455.853	13.1024	13.0877	559.69	140.645	134.697	451.575	13.8656	13.8508	18.5527
3293A_94	294.767	1.53455	0.566296	0.0393035	13.1684	0.328395	0.26666	0.0537293	0.00318764	455.616	25.6406	25.3207	471.839	14.6344	14.6178	359.719	136.728	131.169	468.654	15.0279	15.0105	-31.1687
3293A_26	86.9505	1.52483	0.534223	0.0742041	13.4689	0.427868	0.133944	0.0561856	0.00672432	434.608	49.7136	48.5255	461.68	16.9595	16.9358	459.711	276.979	254.942	470.584	18.6586	18.6317	-0.428421
3293A_85	71.1161	1.29672	0.598965	0.0721313	13.5766	0.538335	0.134778	0.0590885	0.00546766	476.577	46.3297	45.2963	458.146	19.7254	19.694	570.359	207.979	195.22	471.035	22.6553	22.6157	19.6741
3293A_57	167.011	1.90009	0.644227	0.0577833	12.8937	0.362532	0.188477	0.0606046	0.0040122	504.92	36.001	35.3738	481.526	16.1861	16.1658	625.229	146.037	139.609	473.563	19.4695	19.4387	22.9841
3293A_24	140.036	1.56953	0.6205	0.0539509	13.2124	0.581182	0.282644	0.0606358	0.00476081	490.16	34.0893	33.5267	470.323	22.1182	22.0804	626.338	173.918	164.876	473.722	22.5916	22.552	24.9092
3293A_48	198.12	1.22996	0.62086	0.0715983	13.3024	1.105	0.366158	0.0641884	0.0065102	490.386	45.3551	44.3646	467.256	38.6411	38.5256	747.843	221.928	207.31	475.092	44.2861	44.136	37.5195
3293A_92	151.665	2.7711	0.555727	0.054994	12.8176	0.393132	0.257971	0.0514137	0.00427669	448.741	36.214	35.5797	484.279	17.1699	17.1471	259.421	196.935	185.675	475.385	20.8167	20.7846	-86.6771
3293A_50	121.468	1.85996	0.616872	0.0836179	12.9862	0.831741	0.19381	0.0547822	0.00682304	487.885	53.2022	51.844	478.22	31.0559	30.9826	403.344	291.694	267.436	483.459	32.4014	32.3187	-18.5637
3293A_103	299.146	1.72173	0.59849	0.0615652	12.5462	0.709416	0.321207	0.0529263	0.00409422	476.275	39.4887	38.7353	494.365	28.6111	28.5477	325.638	180.557	171.007	486.05	32.7813	32.6996	-51.8142
3293A_8	157.624	1.64143	0.58912	0.0600498	12.831	1.32515	0.564118	0.0595292	0.00595236	470.306	38.7365	38.0114	483.793	49.2306	49.0433	586.506	224.718	209.881	496.902	56.4241	56.1797	17.5128
3293A_70	146.863	6.18499	0.759282	0.0712806	11.7667	0.320987	0.170903	0.0650436	0.00525722	573.596	41.5625	40.7291	525.814	17.2411	17.2195	775.748	174.777	165.568	529.224	19.0879	19.0597	32.2184
3293A_49	59.1409	2.23224	1.41069	0.19223	7.44467	0.920431	0.568495	0.0754413	0.00959106	893.45	82.6256	79.395	812.488	96.047	95.3368	1080.28	266.203	245.065	834.756	110.365	109.429	24.7894
3293A_69	61.7599	1.34578	1.84247	0.177961	6.73706	0.222881	0.291909	0.0781161	0.0047481	1060.74	64.5871	62.5959	892.172	32.4718	32.3916	1149.83	123.133	118.392	907.568	36.0822	35.9803	22.4082
3293A_46	52.0594	3.38592	1.65015	0.223941	6.45826	0.435796	0.247078	0.0688045	0.00721763	989.609	87.6663	84.0378	928.04	61.1493	60.8606	892.885	224.453	209.391	930.872	64.9617	64.6347	-3.93721
3293A_107	211.041	1.50903	1.49812	0.164189	6.40662	0.521032	0.401639	0.0711357	0.0068997	929.622	67.8576	65.6633	935.003	73.1439	72.7313	961.315	204.732	192.078	940.284	73.4926	73.0748	2.7371
3293A_60	52.8787	4.58544	1.58786	0.226217	6.24964	0.1988	0.154682	0.0698013	0.00691092	965.457	90.7573	86.8746	956.828	33.7374	33.648	922.513	210.416	197.101	962.613	33.8411	33.7525	-3.71973
3293A_65	50.8346	1.781	1.5382	0.173026	6.21903	0.237404	0.232051	0.0735395	0.00506869	945.783	70.4245	68.0638	961.204	38.7693	38.6531	1028.86	142.591	136.313	963.008	40.4991	40.3709	6.57566
3293A_84	154.305	3.34653	1.82477	0.130887	6.12617	0.226723	0.384981	0.0792272	0.00423939	1054.4	47.6019	46.5115	974.724	38.2652	38.1532	1177.82	107.691	104.042	971.532	40.9335	40.8039	17.2431
3293A_43	68.5473	2.49498	1.59176	0.194957	6.18723	0.48856	0.303794	0.0731685	0.00786697	966.985	77.8525	74.9777	965.791	73.4278	73.0119	1018.62	225.746	210.411	973.825	79.2062	78.7227	5.18656
3293A_16	37.19	2.91273	1.54177	0.22227	6.2203	0.536627	0.392706	0.0761485	0.00898639	947.211	90.7918	86.9058	961.02	79.5295	79.0431	1098.98	245.622	227.497	974.651	85.9979	85.4293	12.5532
3293A_86	78.7426	2.79663	1.63562	0.162402	6.02578	0.333564	0.351264	0.0725015	0.00564468	984.025	63.5501	61.6215	989.777	54.2242	53.9983	1000.05	162.277	154.208	984.76	54.1459	53.9182	1.02737
3293A_104	337.929	4.01296	1.75377	0.146924	6.18079	0.399613	0.440601	0.074492	0.00551245	1028.55	54.91	53.4646	966.725	60.9607	60.6725	1054.83	152.747	145.555	985.967	67.3094	66.9599	8.35233
3293A_91	101.591	1.4227	1.61623	0.130194	6.06514	0.220633	0.417435	0.0714803	0.00439625	976.527	51.1689	49.9112	983.82	38.0669	37.9549	971.179	128.054	122.985	991.94	39.9196	39.795	-1.30161
3293A_68	484.819	6.38615	1.64088	0.112068	6.01308	0.172625	0.299408	0.0700461	0.00381276	986.049	43.5523	42.6378	991.716	32.4769	32.3967	929.706	113.796	109.784	999.23	32.5882	32.5061	-6.66983
3293A_101	313.298	5.95512	1.71978	0.11947	5.98925	0.326705	0.381176	0.0770995	0.00511342	1015.94	45.0992	44.1193	995.371	53.7763	53.5542	1123.76	135.129	129.449	1004.7	56.4548	56.2073	11.4251
3293A_19	147.099	3.7932	1.73029	0.181901	5.92186	0.317395	0.300274	0.0743595	0.00700353	1019.86	68.8006	66.5459	1005.86	53.7296	53.5053	1051.24	195.857	184.19	1006.52	53.7333	53.5103	4.31699
3293A_78	65.5339	3.75005	1.89142	0.192862	5.8301	0.221712	0.248867	0.0735405	0.00571134	1078.08	68.8829	66.6227	1020.5	40.8088	40.6814	1028.89	161.144	153.172	1017.23	43.1419	42.9981	0.815056
3293A_77	38.9394	1.21606	1.72947	0.205424	5.81471	0.224277	0.277267	0.073583	0.00677002	1019.55	77.8943	75.0166	1023	41.3587	41.2264	1030.05	191.806	180.615	1017.3	46.7018	46.5331	0.684916
3293A_34	171.358	3.17176	1.72829	0.139808	5.83685	0.190344	0.242153	0.0705668	0.00457781	1019.11	52.7102	51.3769	1019.41	36.5411	36.4378	944.891	135.779	130.101	1018.63	36.5061	36.4016	-7.88637
3293A_105	224.665	2.40741	1.78152	0.13806	5.88313	0.408056	0.472436	0.0776163	0.00562739	1038.73	51.0342	49.7834	1011.99	67.8418	67.4868	1137.07	147.733	140.966	1019.86	68.272	67.9123	11.0004
3293A_110	324.182	4.94036	1.73155	0.132955	5.73437	0.345456	0.538037	0.0686744	0.00431757	1020.33	50.0337	48.831	1036.24	60.9615	60.6745	888.977	132.664	127.255	1020.43	63.607	63.2935	-16.5654
3293A_74	141.319	3.07593	1.69047	0.157013	5.87445	0.179829	0.349477	0.0736169	0.00397837	1004.94	60.1387	58.4088	1013.37	34.5775	34.485	1030.98	111.206	107.35	1021.9	35.0275	34.9314	1.70837
3293A_62	224.399	3.74916	1.76297	0.130693	5.83087	0.157072	0.346873	0.0731696	0.00375618	1031.94	48.6067	47.4702	1020.38	32.0262	31.9483	1018.65	105.74	102.25	1022.1	32.3924	32.31	-0.169047
3293A_37	122.222	4.62587	1.74387	0.12956	5.76126	0.168146	0.31468	0.0741729	0.00434298	1024.9	48.5196	47.387	1031.77	34.2188	34.127	1046.18	120.391	115.88	1029.49	34.6762	34.5833	1.3773
3293A_90	103.364	4.3119	1.62347	0.143356	5.7383	0.19985	0.429221	0.0720984	0.00384733	979.333	56.2565	54.74	1035.58	38.6259	38.5116	988.719	110.498	106.7	1033.2	39.4871	39.3654	-4.73973
3293A_32	82.6836	3.50233	1.82726	0.209793	5.75442	0.144147	0.210357	0.073483	0.00547286	1055.3	76.7782	73.9808	1032.9	31.1475	31.0726	1027.3	154.407	147.073	1039.85	31.2162	31.1422	-0.545117
3293A_80	522.478	4.52096	1.97527	0.121998	5.65786	0.145607	0.379429	0.0783597	0.00380167	1107.11	42.0675	41.2136	1049.17	31.8455	31.7681	1156.01	97.794	94.779	1051.26	33.1415	33.0577	9.24206
3293A_71	152.725	3.695	1.68479	0.125066	5.57064	0.155616	0.212243	0.0709341	0.00438046	1002.8	47.8593	46.7574	1064.31	34.0346	33.9462	955.514	128.902	123.771	1059.55	34.733	34.641	-11.3863
3293A_99	1492.74	4.84221	1.80365	0.124149	5.62503	0.266672	0.357159	0.074519	0.00456181	1046.78	45.4674	44.4717	1054.82	50.2628	50.0665	1055.56	125.802	120.883	1060.85	50.823	50.6236	0.0701051
3293A_10	116.405	3.18653	1.97172	0.214503	5.58768	0.462049	0.467441	0.0767038	0.00706726	1105.89	74.6468	72.0003	1061.32	83.7919	83.2497	1113.5	189.659	178.661	1061.67	85.6597	85.0932	4.6863
3293A_47	435.146	4.45798	1.74715	0.14811	5.60622	0.32946	0.441625	0.0717423	0.00522878	1026.11	55.4949	54.0187	1058.08	60.9381	60.6503	978.639	152.159	145.051	1062.77	61.1361	60.8488	-8.11769
3293A_64	102.244	2.21493	1.99911	0.198381	5.604	0.253554	0.156829	0.0795804	0.00636021	1115.21	68.3	66.0772	1058.47	48.6006	48.4179	1186.61	162.059	153.93	1066.23	48.8451	48.661	10.7988
3293A_108	149.871	3.89621	1.61251	0.144888	5.53951	0.385522	0.395603	0.066865	0.00558755	975.084	57.1075	55.5458	1069.82	71.6338	71.2391	833.57	179.178	169.48	1077.24	73.3285	72.9123	-28.3423
3293A_96	653.347	2.72722	1.88461	0.102224	5.35223	0.136915	0.378348	0.0738309	0.00317359	1075.69	36.3054	35.6676	1104.22	33.1686	33.082	1036.85	88.0475	85.6118	1081.9	34.6061	34.5122	-6.49816
3293A_23	182.797	2.2799	2.01349	0.181314	5.56492	0.318388	0.383354	0.0776055	0.00547306	1120.07	62.0309	60.192	1065.32	59.9744	59.6954	1136.79	143.612	137.209	1089.08	61.9077	61.6106	6.28734
3293A_67	62.3813	1.60385	2.00567	0.216749	5.21004	0.177908	0.222166	0.0755988	0.00526445	1117.43	74.5755	71.9334	1131.86	41.4242	41.2931	1084.46	142.882	136.561	1104.68	46.3564	46.1905	-4.37027
3293A_66	177.776	4.6322	2.10474	0.151708	5.37347	0.180948	0.274946	0.0789983	0.00412765	1150.36	50.2311	49.0185	1100.21	39.9556	39.8321	1172.09	105.201	101.718	1106.29	40.3684	40.2438	6.1328
3293A_5	276.691	3.45197	1.97146	0.217737	5.24087	0.588983	0.470782	0.0777316	0.00891258	1105.81	75.8007	73.0727	1125.75	118.676	117.595	1140.02	236.89	219.951	1131.12	119.159	118.067	1.25191
3293A_61	159.137	3.46627	2.04988	0.163616	5.02486	0.190828	0.429767	0.0761766	0.00426759	1132.26	55.2157	53.7542	1170	46.3	46.1342	1099.71	114.162	110.087	1139.05	49.6389	49.4485	-6.39148
3293A_22	192.74	4.72344	2.38073	0.218687	5.15975	0.241798	0.390392	0.0809034	0.00507722	1236.83	66.7671	64.6415	1141.97	53.8458	53.6231	1219.1	125.925	120.953	1142.27	55.3002	55.0641	6.32672
3293A_87	95.393	2.05912	2.04019	0.310073	5.15325	0.430859	0.329148	0.0778179	0.00847845	1129.03	106.294	101.006	1143.29	90.4607	89.8306	1142.23	224.587	209.304	1145.55	90.6039	89.9716	-0.0928886
3293A_1	125.412	3.1394	2.15611	0.199506	5.18498	0.0978377	0.252936	0.0778118	0.0044357	1167.02	65.221	63.1916	1136.88	29.6542	29.5862	1142.07	115.47	111.293	1147.48	29.6698	29.6018	0.45505
3293A_58	319.423	3.6217	2.21807	0.139307	5.12319	0.156073	0.442939	0.079102	0.00365639	1186.76	44.4379	43.4861	1149.43	38.7793	38.6628	1174.69	92.8471	90.1228	1149.55	38.7632	38.6481	2.14985
3293A_4	60.9578	3.81445	2.01654	0.213255	5.08213	0.390089	0.355667	0.0814801	0.00716161	1121.09	73.0823	70.5433	1157.93	84.6821	84.1294	1233.05	177.485	167.758	1157.12	84.6088	84.0582	6.09165
3293A_2	261.968	2.58074	2.10947	0.154934	5.10115	0.123275	0.389157	0.0797302	0.00351915	1151.9	51.2339	49.9731	1153.98	34.0392	33.9483	1190.32	88.3941	85.9193	1159.46	34.0488	33.9605	3.05296
3293A_35	406.269	8.83868	2.17487	0.146085	4.97131	0.154451	0.285783	0.0792338	0.00419453	1173.04	47.2663	46.1912	1181.52	40.4423	40.3172	1177.98	106.52	102.948	1163.77	40.0789	39.955	-0.30026
3293A_98	757.129	2.82942	2.1223	0.115807	4.9987	0.174525	0.443475	0.077014	0.00342279	1156.09	38.0146	37.316	1175.6	43.4541	43.3081	1121.55	89.9251	87.3739	1172.32	44.8687	44.7144	-4.81885
3293A_31	114.112	2.47649	2.14193	0.15342	4.96523	0.154633	0.257772	0.0751667	0.00371239	1162.45	50.1963	48.9855	1182.84	40.5766	40.4478	1072.96	100.828	97.6399	1180.8	41.6973	41.564	-10.2406
3293A_41	414.982	4.34049	2.34866	0.216692	4.81688	0.293875	0.377214	0.0836362	0.006458	1227.15	66.7919	64.6651	1216.04	71.606	71.2104	1284.1	154.221	146.804	1230.22	72.2475	71.845	5.30082
3293A_54	58.2468	2.95176	2.78195	0.249713	4.70916	0.211209	0.279663	0.0893131	0.00582739	1350.7	68.1751	65.9606	1241.34	55.8684	55.6273	1410.88	127.499	122.354	1259.78	58.9514	58.683	12.017
3293A_7	262.833	2.07228	2.76554	0.292783	4.48915	0.389513	0.445481	0.0869575	0.00871383	1346.29	80.5249	77.4533	1296.44	105.32	104.467	1359.55	199.518	187.23	1307.52	106.054	105.189	4.64233
3293A_100	99.9477	3.07163	2.5605	0.239879	4.52216	0.115888	0.235285	0.0886782	0.00569935	1289.43	69.5876	67.282	1287.86	38.1838	38.0725	1397.22	125.789	120.782	1316.85	41.3202	41.1872	7.82684
3293A_25	380.184	2.53674	3.07748	0.233601	4.4424	0.19589	0.367364	0.0960931	0.00547121	1427.1	59.0214	57.3541	1308.79	57.9507	57.6901	1549.59	108.887	105.086	1320.73	59.9288	59.6517	15.5401
3293A_106	172.789	3.27142	2.74114	0.291636	4.34833	0.363337	0.463548	0.0831366	0.00738509	1339.69	80.7368	77.6494	1334.36	104.037	103.206	1272.42	178.408	168.562	1330.23	105.539	104.682	-4.86748
3293A_109	244.853	3.57861	2.66846	0.194835	4.28933	0.247228	0.392399	0.0822581	0.00562951	1319.77	54.6568	53.2241	1350.92	74.6477	74.2192	1251.67	136.931	131.062	1333.52	76.6805	76.2269	-7.92942
3293A_88	142.341	2.78235	2.72246	0.247717	4.33508	0.319885	0.439515	0.0881324	0.00744527	1334.61	68.7199	66.4702	1338.04	92.8128	92.1494	1385.37	166.716	158.038	1340.21	94.283	93.5996	3.41634
3293A_3	94.7431	2.69304	2.69544	0.299388	4.27699	0.199881	0.386291	0.0881048	0.0057889	1327.21	83.9741	80.6393	1354.43	62.856	62.5512	1384.77	128.881	123.633	1359.24	62.9717	62.6657	2.1909
3293A_21	294.591	3.21795	2.78215	0.192045	4.2594	0.180584	0.433123	0.0882195	0.00460291	1350.76	52.2234	50.914	1359.47	58.1196	57.8576	1387.27	101.858	98.5515	1366.25	58.2784	58.0173	2.00343
3293A_45	154.06	2.664	3.05638	0.2941	4.17309	0.319289	0.512976	0.0886279	0.00691324	1421.83	74.9859	72.3157	1384.78	99.1522	98.3956	1396.13	153.378	145.998	1389.04	102	101.199	0.813319
3293A_83	248.213	3.02135	2.87801	0.207528	4.19048	0.149004	0.418108	0.0928457	0.00480739	1376.17	55.0774	53.6231	1379.6	50.9936	50.7928	1484.74	99.7239	96.5366	1390.3	51.6003	51.3936	7.08136
3293A_56	197.559	2.54247	3.01275	0.210823	4.06807	0.0814472	0.26578	0.0873251	0.004393	1410.85	54.0599	52.6576	1416.87	36.6122	36.5097	1367.68	98.4178	95.3307	1409.7	36.534	36.4308	-3.59654
3293A_89	128.587	2.65943	3.24777	0.253762	3.95267	0.116499	0.368296	0.0898483	0.00404501	1468.64	61.5834	59.7709	1453.9	46.6762	46.5067	1422.31	87.2619	84.8192	1441.98	47.8949	47.7167	-2.22097
3293A_18	508.785	1.86388	3.55851	0.341992	3.7157	0.277047	0.444056	0.0925899	0.00802173	1540.33	77.6426	74.7828	1536.38	106.343	105.473	1479.51	168.882	159.94	1458.43	169.626	160.618	-3.84329
3293A_81	135.256	2.42125	3.42562	0.268902	3.92348	0.144228	0.387922	0.0959179	0.00501528	1510.29	62.6515	60.7763	1463.57	55.1544	54.9183	1546.16	99.8919	96.6844	1464.74	55.1617	54.9267	5.34173
3293A_42	49.2656	1.85694	2.94645	0.465002	3.90117	0.227094	0.239214	0.0946087	0.0106633	1393.94	123.309	116.249	1471.06	81.5262	81.0137	1520.3	220.369	205.356	1472.13	82.7422	82.2146	3.23878
3293A_93	126.001	2.72181	3.28322	0.323501	3.95626	0.109896	0.306083	0.0950746	0.00576313	1477.08	78.175	75.2764	1452.71	44.8195	44.6644	1529.55	116.374	112.047	1480.47	45.6209	45.4611	5.02363
3293A_30	153.565	3.89406	3.44619	0.255785	3.885	0.142951	0.322014	0.0959532	0.00535526	1515	59.2707	57.5896	1476.53	55.9507	55.7089	1546.86	106.735	103.081	1485.65	58.4767	58.2126	4.54645
3293A_38	245.305	1.09199	3.48154	0.250424	3.81203	0.10575	0.407704	0.0893144	0.00384094	1523.04	57.5463	55.9605	1501.74	46.5296	46.3624	1410.91	83.4317	81.1974	1489.38	47.6891	47.5147	-6.43754
3293A_76	391.613	2.90465	3.49406	0.214464	3.83067	0.099771	0.308849	0.0927774	0.00449271	1525.87	49.0431	47.8864	1495.21	44.2666	44.1161	1483.35	93.1822	90.3936	1500.59	44.2956	44.1438	-0.800015
3293A_55	111.625	1.35624	3.37191	0.250837	3.74615	0.0791689	0.344169	0.0923947	0.0042386	1497.89	59.1093	57.4374	1525.25	40.1778	40.0543	1475.51	88.2972	85.791	1511.48	91.6256	88.9247	-3.3711
3293A_9	177.073	2.43862	3.37926	0.405913	3.79595	0.392666	0.51596	0.0937526	0.0106897	1499.6	96.3662	92.0002	1507.41	142.706	141.144	1503.13	223.551	208.129	1514.45	143.248	141.673	-0.284339
3293A_14	152.066	2.85662	3.25081	0.332644	3.76021	0.27613	0.483467	0.093992	0.00785574	1469.37	81.0545	77.9429	1520.17	103.883	103.053	1507.95	162.127	153.858	1515.18	164.929	156.376	-0.81037
3293A_20	235.99	0.886817	4.06013	0.36051	3.55931	0.243	0.482186	0.0964007	0.00745935	1646.33	73.6612	71.0824	1596.16	101.393	100.602	1555.59	148.84	141.826	1537.37	149.448	142.384	-2.60775
3293A_13	171.25	1.46359	4.03372	0.460402	3.43888	0.277117	0.541588	0.0958413	0.007644	1641.02	95.061	90.8094	1645.49	121.544	120.41	1544.66	153.758	146.288	1551.42	156.993	149.21	-6.52712
3293A_59	94.8618	2.99032	3.62489	0.387799	3.60784	0.0885985	0.27282	0.0987318	0.00585109	1555.01	86.9766	83.4041	1577.12	44.9179	44.763	1600.31	112.66	108.586	1564.97	117.016	112.635	1.44922
3293A_79	103.237	3.12727	3.61218	0.301503	3.72079	0.101526	0.435242	0.0958649	0.00407728	1552.22	67.4858	65.3149	1534.5	46.6253	46.4584	1545.13	81.013	78.8902	1566.86	90.1907	87.5651	0.687452
3293A_73	187.799	2.72004	3.87239	0.332524	3.68602	0.117949	0.359891	0.0985789	0.0045948	1607.94	70.5063	68.1405	1547.38	52.3684	52.1552	1597.41	88.2847	85.7636	1577.01	89.0917	86.5277	3.1325
3293A_33	151.069	1.43774	4.02067	0.29062	3.58101	0.107779	0.30728	0.0986658	0.00492221	1638.38	59.6425	57.9406	1587.59	51.6247	51.4187	1599.06	94.5705	91.6832	1585.09	94.3501	91.4783	0.717234
3293A_28	273.554	2.46868	3.73715	0.234235	3.69589	0.0996592	0.468801	0.0999492	0.00427197	1579.36	50.8378	49.5967	1543.7	46.9204	46.7504	1623.14	80.5854	78.4771	1591.56	85.052	82.7103	4.89404
3293A_39	132.654	1.31211	4.02576	0.428832	3.44216	0.139845	0.333651	0.0978031	0.00536466	1639.41	88.5418	84.8423	1644.1	66.3962	66.0558	1582.65	104.371	100.868	1596.02	108.89	105.08	-3.88285
3293A_102	42.6517	1.43428	4.06378	0.454385	3.41856	0.205476	0.298662	0.100494	0.0100347	1647.07	93.2199	89.1281	1654.11	92.8615	92.1988	1633.25	191.498	179.998	1598.02	200.455	187.91	-1.27752
3293A_11	288.34	1.75084	3.923	0.377522	3.5919	0.260805	0.432537	0.10181	0.00824325	1618.44	79.3969	76.4092	1583.32	106.602	105.726	1657.38	153.844	146.325	1598.89	160.037	151.939	4.46844
3293A_82	54.9726	0.86202	3.96729	0.384412	3.58428	0.11082	0.395573	0.0977961	0.00513243	1627.53	80.1401	77.0966	1586.3	52.1743	51.9639	1582.52	99.786	96.5795	1607.38	103.754	100.287	-0.239176
3293A_27	97.3224	2.31668	3.87234	0.329753	3.37834	0.0867968	0.307624	0.100405	0.00465482	1607.94	69.9093	67.5824	1671.46	48.8667	48.681	1631.61	87.4125	84.9358	1626.19	88.7299	86.1802	-2.4425
3293A_53	207.119	1.24342	4.1516	0.323201	3.41991	0.12547	0.393598	0.104369	0.00496788	1664.53	64.7236	62.7243	1653.54	61.5482	61.2568	1703.22	88.9596	86.3875	1679.6	90.3947	87.7427	2.91683
3293A_95	131.158	1.70945	4.11322	0.304297	3.4691	0.110899	0.339151	0.103603	0.00478072	1656.93	61.3445	59.5455	1632.82	54.7226	54.4913	1689.64	86.3514	83.9271	1684.94	86.4894	84.0581	3.36261
3293A_51	288.075	2.28232	3.65162	0.334061	3.89379	0.300173	0.477855	0.103636	0.00829766	1560.86	74.2624	71.6421	1473.55	105.564	104.706	1690.23	151.442	144.139	1698.27	156.788	148.972	12.8197
3293A_6	52.6779	1.9645	4.07139	0.564183	4.12582	0.391381	0.54125	0.108812	0.0101589	1648.59	116.223	109.93	1399.04	122.824	121.666	1779.63	175.339	165.583	1715.11	183.944	173.268	21.386
3293A_17	107.492	1.27645	4.32675	0.451102	3.59938	0.238771	0.48631	0.106405	0.00794122	1698.47	87.8624	84.218	1580.4	97.9151	97.1785	1738.72	140.049	133.767	1723.29	140.539	134.218	9.10564
3293A_52	116.057	2.17979	5.04586	0.374936	3.02023	0.141509	0.400522	0.109869	0.00659275	1827.05	63.9663	62.0126	1843.71	82.3681	81.845	1797.23	111.26	107.248	1788.7	111.511	107.482	-2.58625
3293A_29	82.3763	1.31411	5.10083	0.52341	3.10605	0.0786736	0.388298	0.114138	0.00511404	1836.24	89.0366	85.2965	1799.26	50.9321	50.7314	1866.31	81.9834	79.7768	1853.11	83.9339	81.6242	3.59302
3293A_72	82.3838	1.31419	5.17046	0.5358	3.10468	0.0788389	0.377862	0.114872	0.00524119	1847.77	90.14	86.3086	1799.95	51.3406	51.1384	1877.87	83.3895	81.1065	1861.92	85.4053	83.0138	4.14928
3293A_44	198.876	3.63122	5.19495	0.438707	2.96885	0.223085	0.628305	0.114798	0.00811088	1851.79	73.21	70.6624	1871.4	127.225	125.981	1876.72	130.163	124.684	1866.76	130.455	124.955	0.28326
3293A_36	222.642	2.60467	7.86926	0.518619	2.53772	0.0913768	0.412452	0.145884	0.00701894	2216.17	60.2584	58.5221	2141.6	76.0115	75.5674	2298.23	83.8845	81.5314	2268.53	87.687	85.1228	6.81495
3293A_12	53.115	0.957876	13.0968	1.78159	1.85065	0.142165	0.450157	0.184041	0.0166955	2686.65	132.561	124.436	2784.91	181.429	178.912	2689.62	153.993	146.127	2655.39	160.228	151.741	-3.54272
3293A_40	225.365	2.35909	12.7849	0.910478	1.94512	0.0901781	0.484431	0.18163	0.00940709	2663.93	68.1976	65.9814	2674.14	111.685	110.727	2667.81	87.0836	84.5133	2681.34	89.6612	86.9376	-0.237311
16051804 (329-04) targetted, Lettergesh Formation
3294A_1	397.583	2.67636	1.93515	0.176952	5.72351	0.0749179	0.310978	0.0794121	0.0053203	1093.32	62.1563	60.3101	1038.05	39.7619	39.6397	1182.43	135.347	129.631	1025	39.9044	39.7813	12.2098
3294A_2	700.989	1.26444	0.554133	0.0427956	14.2896	0.218968	0.348804	0.0561723	0.00339339	447.7	28.1544	27.7695	436.04	17.6844	17.6602	459.186	136.844	131.241	430.93	17.8122	17.7861	5.04051
3294A_3	308.172	3.18379	1.66317	0.128271	6.33938	0.0783176	0.351093	0.0746148	0.00438253	994.585	49.5042	48.3262	944.228	35.9599	35.8599	1058.14	120.555	116.03	934.977	36.1716	36.0704	10.7656
3294A_4	1881.98	3.05859	1.69403	0.11875	6.05751	0.0841732	0.458844	0.0720655	0.00369501	1006.28	45.2578	44.2709	984.97	39.3634	39.2449	987.791	106.113	102.605	976.028	39.4553	39.3361	0.285577
3294A_5	452.851	2.38114	1.62132	0.122682	6.11999	0.0771957	0.385965	0.0734543	0.00401801	978.504	48.0864	46.974	975.638	37.5151	37.4049	1026.51	112.665	108.709	975.806	38.0998	37.9875	4.95608
3294A_6	279.593	0.617417	0.497237	0.0557121	15.2251	0.460136	0.223797	0.0559759	0.00520444	409.83	38.1383	37.4353	410.083	19.4153	19.3861	451.411	213.394	200.079	407.202	19.4818	19.4539	9.15537
3294A_7	164.136	2.48899	1.80154	0.170269	6.29253	0.129125	0.254023	0.0718773	0.00542307	1046.02	62.669	60.7931	950.764	38.6127	38.4961	982.467	157.561	149.95	948.535	39.3567	39.2355	3.22684
3294A_8	1396.17	1.51642	0.544045	0.0373264	14.114	0.292298	0.445113	0.053657	0.00286582	441.088	24.696	24.3992	441.283	19.1361	19.1077	356.683	122.894	118.385	438.423	19.1604	19.1306	-23.7188
3294A_9	105.166	0.798543	11.7841	1.07207	2.13363	0.0278334	0.404334	0.184217	0.00948415	2587.4	86.986	83.4126	2477.79	85.3645	84.8045	2691.21	86.3636	83.833	2685.27	87.2552	84.6737	7.93004
3294A_10	612.863	4.40887	1.21305	0.0960899	8.98922	0.137611	0.307024	0.0760444	0.0046172	806.593	44.5729	43.616	679.97	27.2673	27.2111	1096.24	123.989	119.196	687.392	30.1656	30.0966	37.9726
3294A_11	641.251	2.70744	1.58451	0.111548	6.32217	0.0958241	0.451896	0.0712518	0.00360791	964.143	44.3039	43.3579	946.619	37.5555	37.4452	964.647	105.149	101.707	936.977	37.6412	37.5329	1.86885
3294A_12	403.163	1.91939	1.96438	0.159002	5.6933	0.0829889	0.395865	0.0761954	0.0043117	1103.39	55.2065	53.7451	1043.14	40.6157	40.4882	1100.21	115.326	111.169	1026.36	40.9216	40.7922	5.18711
3294A_13	197.437	3.36037	1.82163	0.16869	6.1281	0.127344	0.268481	0.0785435	0.00591419	1053.27	61.6302	59.8146	974.439	39.8426	39.72	1160.65	153.035	145.775	969.36	39.9962	39.8725	16.044
3294A_14	357.902	0.867709	0.501431	0.0463161	15.2659	0.356481	0.238074	0.052594	0.0041052	412.671	31.5666	31.0834	409.022	17.9104	17.8842	311.324	182.705	172.941	410.743	18.6118	18.5864	-31.3817
3294A_15	296.533	1.86571	1.67685	0.162546	6.18091	0.119182	0.32074	0.0715118	0.00468183	999.789	62.6124	60.7394	966.707	39.308	39.1873	972.079	136.477	130.733	958.392	39.4028	39.2826	0.552619
3294A_16	642.188	2.49863	1.71009	0.125159	6.35184	0.0984794	0.425041	0.0741108	0.00390193	1012.32	47.4429	46.3597	942.505	37.6208	37.5113	1044.48	108.069	104.421	934.39	37.8869	37.776	9.76365
3294A_17	578.535	2.09435	1.75236	0.152249	6.22765	0.0906281	0.37418	0.0735961	0.00444469	1028.04	56.958	55.4038	959.966	37.9267	37.8167	1030.41	124.552	119.735	952.402	37.9552	37.8426	6.83664
3294A_18	677.845	2.98013	1.59044	0.112925	6.14099	0.101451	0.413634	0.0710075	0.00372708	966.468	44.7531	43.7882	972.542	39.165	39.0452	957.63	109.183	105.478	963.968	39.1921	39.0732	-1.5571
3294A_19	62.9258	1.63515	2.15309	0.333705	5.91012	0.221262	0.204276	0.079612	0.00663246	1166.05	110.41	104.715	1007.71	49.8419	49.6511	1187.39	169.101	160.269	1003.21	52.6092	52.3954	15.1327
3294A_20	222.716	1.27628	2.20918	0.207718	4.902	0.0893049	0.320372	0.0791477	0.00496041	1183.95	66.8089	64.6809	1196.77	47.4568	47.2829	1175.83	126.554	121.545	1200.68	48.1309	47.9521	-1.78036
3294A_21	118.16	1.77732	1.78078	0.249421	6.16538	0.143824	0.217307	0.076873	0.00627048	1038.46	93.1796	89.0912	968.969	40.581	40.4523	1117.9	167.196	158.588	961.392	41.9318	41.7972	13.3223
3294A_22	1176.81	2.15479	1.69488	0.122078	6.24829	0.110357	0.41894	0.0746763	0.00396162	1006.6	46.5255	45.4834	957.02	39.4736	39.3531	1059.8	108.652	104.963	971.938	41.0449	40.9148	9.69827
3294A_23	67.6741	0.502447	1.61526	0.183396	6.23073	0.204679	0.224826	0.0754047	0.00678622	976.154	72.4826	69.9841	959.526	45.0535	44.8967	1079.31	186.082	175.503	943.619	46.9532	46.7827	11.0982
3294A_24	2373.53	8.41997	0.49784	0.0350596	15.753	0.514563	0.546191	0.055093	0.00296545	410.239	23.9071	23.6289	396.754	20.007	19.976	415.999	122.571	118.069	397.588	20.6152	20.5808	4.62612
3294A_25	1201.4	2.47717	3.31807	0.239371	4.17732	0.0769161	0.496735	0.0914422	0.00453297	1485.31	57.0822	55.5217	1383.51	56.2114	55.9673	1455.83	95.783	92.8435	1388.13	57.2339	56.9811	4.96728
3294A_26	178.549	3.21068	2.0181	0.197265	5.28288	0.160862	0.335729	0.0735541	0.0051481	1121.62	67.4749	65.3046	1117.53	50.9559	50.7554	1029.26	144.84	138.367	1112.4	52.0367	51.8275	-8.57626
3294A_27	1189.93	1.10466	0.528736	0.0400871	15.3326	0.263138	0.332611	0.0569289	0.00356492	430.97	26.8018	26.4528	407.295	17.1856	17.1613	488.78	141.23	135.258	406.795	17.4918	17.4681	16.6711
3294A_28	76.4771	1.58225	1.99492	0.237877	5.80677	0.156488	0.180194	0.0753916	0.00643098	1113.79	82.2936	79.0885	1024.29	44.4615	44.3075	1078.96	176.1	166.597	1013.82	46.9524	46.7821	5.06682
3294A_29	1037.76	1.3482	0.582927	0.0439799	13.6247	0.194783	0.359011	0.0573229	0.00348255	466.341	28.4091	28.0171	456.584	18.7336	18.7065	503.977	136.566	130.97	453.657	18.8641	18.8365	9.40367
3294A_30	903.684	0.947503	1.58817	0.12158	6.19535	0.128528	0.43532	0.0723342	0.00397933	965.581	48.2668	47.1461	964.616	40.9629	40.8332	995.359	113.863	109.832	961.146	41.3848	41.2524	3.08867
3294A_31	607.199	1.1758	0.518582	0.0424625	15.1903	0.303725	0.326333	0.054353	0.00346054	424.204	28.5923	28.1953	410.994	17.6162	17.5907	385.706	146.28	139.924	410.465	18.4812	18.4548	-6.55613
3294A_32	477.572	2.17809	1.87451	0.130942	5.64781	0.0752194	0.417718	0.0771965	0.00400168	1072.13	46.7886	45.735	1050.89	41.0357	40.9056	1126.27	105.068	101.602	1044.95	41.0486	40.9186	6.69254
3294A_33	411.696	2.65208	1.73526	0.137011	6.23386	0.107661	0.323368	0.0715074	0.00468718	1021.7	51.5088	50.2347	959.078	38.7768	38.6618	971.953	136.648	130.89	955.88	38.9741	38.8554	1.32464
3294A_34	331.925	2.22107	1.40144	0.107784	6.43588	0.114335	0.383474	0.0707852	0.00402777	889.546	46.0923	45.0694	931.045	37.7172	37.6058	951.217	118.657	114.296	924.942	37.7663	37.6547	2.12059
3294A_35	483.704	1.95345	2.40653	0.186845	4.99067	0.0736503	0.457413	0.0816702	0.0041335	1244.55	56.4708	54.943	1177.33	46.2524	46.0871	1237.62	100.877	97.6588	1176.96	46.5274	46.3602	4.87153
3294A_36	205.143	1.72249	1.4906	0.157677	6.75458	0.152579	0.372568	0.071031	0.00421046	926.561	65.3222	63.2862	890.011	37.6993	37.588	958.307	123.572	118.849	882.56	37.7362	37.6261	7.12671
3294A_37	246.338	2.08858	3.88013	0.317918	3.80458	0.0739099	0.393573	0.0970419	0.00562123	1609.56	67.2488	65.093	1504.36	59.7495	59.4739	1568.03	110.543	106.624	1497.56	59.7651	59.4891	4.06014
3294A_38	338.473	1.4787	1.71585	0.147626	5.97543	0.138713	0.341631	0.0721641	0.00458377	1014.47	55.9574	54.4566	997.504	42.6984	42.5588	990.572	131.944	126.562	989.953	43.0515	42.9094	-0.699818
3294A_39	312.213	1.33586	0.670226	0.0719937	12.7852	0.200296	0.251365	0.0588439	0.00420995	520.85	44.2458	43.3022	485.463	19.722	19.6904	561.326	159.85	152.209	474.888	19.9932	19.9622	13.5149
3294A_40	494.815	1.84651	1.93626	0.142892	5.59334	0.113844	0.413316	0.0781222	0.00432736	1093.71	50.0242	48.8216	1060.33	44.2121	44.0608	1149.98	112.01	108.073	1055.85	44.2191	44.0682	7.79612
3294A_41	3480.18	2.01579	3.23953	0.209699	4.04958	0.0705766	0.465184	0.0937302	0.00455888	1466.67	50.855	49.6126	1422.67	57.8634	57.6049	1502.68	93.355	90.5541	1422.3	57.9757	57.7174	5.32467
3294A_42	1276.72	3.14931	1.98568	0.133576	5.48177	0.0698383	0.416404	0.0760468	0.00393061	1110.65	45.9429	44.9267	1080.2	43.0649	42.9229	1096.3	105.229	101.757	1075.85	43.1409	42.9972	1.46912
3294A_43	394.732	0.944009	0.54332	0.0438526	15.2334	0.370842	0.272808	0.0581338	0.00379532	440.611	29.0586	28.6484	409.867	18.3934	18.3672	534.809	146.209	139.801	408.653	18.5153	18.4902	23.362
3294A_44	610.907	1.43716	3.72484	0.283492	3.67229	0.0482974	0.452	0.0981511	0.00471277	1576.72	61.8559	60.0274	1552.51	59.6376	59.3629	1589.29	91.0841	88.4039	1590.43	91.0206	88.344	2.31405
3294A_45	414.336	1.05559	3.33733	0.27111	4.06228	0.0550616	0.405419	0.0979952	0.00494554	1489.83	64.4806	62.4961	1418.68	54.6625	54.4318	1586.32	95.8471	92.8846	1428.81	55.5708	55.3312	10.568
3294A_46	619.041	2.48879	1.86013	0.128089	5.59527	0.0742976	0.425109	0.0757883	0.00373574	1067.03	45.9901	44.9716	1059.99	41.836	41.7004	1089.48	100.376	97.2135	1058.81	42.0059	41.8692	2.70706
3294A_47	270.448	1.62079	0.636753	0.0553006	13.5469	0.295415	0.277255	0.0556579	0.00375098	500.294	34.5997	34.0199	459.115	19.8472	19.8153	438.747	153.596	146.581	462.067	20.5359	20.5033	-4.64234
3294A_48	182.282	1.03655	3.74754	0.312634	3.91612	0.12192	0.355071	0.0986948	0.0060556	1581.59	67.9902	65.7876	1466.03	66.5572	66.2168	1599.61	116.731	112.362	1463.14	67.1991	66.852	8.35043
3294A_49	499.041	1.4621	0.557737	0.0490022	14.0866	0.388697	0.298308	0.0544447	0.00367232	450.052	32.195	31.6926	442.114	20.6486	20.6141	389.489	155.077	147.951	438.413	20.915	20.8825	-13.5113
3294A_50	255.492	1.3573	0.732635	0.0818816	13.127	0.438987	0.188137	0.0650416	0.00554992	558.098	48.5615	47.4274	473.273	23.4744	23.4318	775.682	184.806	174.541	470.662	25.9933	25.9396	38.9862
3294A_51	201.532	4.84034	3.5434	0.384334	4.04611	0.110196	0.341433	0.0883179	0.00606144	1536.96	87.7623	84.126	1423.77	61.8428	61.5462	1389.41	134.665	128.944	1418.71	62.0203	61.722	-2.473
3294A_52	424.717	2.01953	2.53468	0.196776	4.90919	0.110139	0.413352	0.0831745	0.00454065	1282.05	57.3281	55.754	1195.16	50.5626	50.3666	1273.31	108.393	104.678	1190.75	50.7514	50.5523	6.13738
3294A_53	424.004	1.92496	0.588353	0.0589558	14.2584	0.39363	0.255962	0.0573541	0.00443703	469.816	38.0425	37.3432	436.962	20.3601	20.328	505.175	174.899	165.823	434.558	20.5576	20.5249	13.5028
3294A_54	169.862	0.735812	1.69402	0.154136	6.40988	0.138511	0.281241	0.0744335	0.00535644	1006.28	58.9414	57.2788	934.561	39.2275	39.1098	1053.24	148.474	141.671	933.604	39.6482	39.5265	11.2684
3294A_55	666.187	2.73556	3.13306	0.211677	4.23807	0.0843593	0.434501	0.0914047	0.00476922	1440.85	52.681	51.3488	1365.64	56.2266	55.9825	1455.05	100.912	97.6545	1359.09	56.5252	56.2797	6.14461
3294A_56	311.527	1.39237	4.04036	0.337411	3.6436	0.0733506	0.438971	0.10725	0.00545256	1642.36	69.1351	66.8589	1563.37	62.9347	62.6288	1753.21	94.5119	91.607	1721.71	96.6757	93.6427	10.8283
3294A_57	699.468	2.62534	1.87992	0.128526	5.59908	0.0900743	0.439179	0.074566	0.00371828	1074.03	45.8283	44.8168	1059.33	42.9064	42.7629	1056.83	102.067	98.8046	1056.61	43.2532	43.1085	-0.236273
3294A_58	978.805	2.64525	2.14119	0.156453	5.22881	0.0893364	0.455881	0.0793747	0.00397008	1162.21	51.2134	49.9534	1128.13	46.2124	46.0487	1181.49	100.492	97.3066	1121.48	46.356	46.1901	4.51649
3294A_59	247.358	1.70949	1.78122	0.179992	6.23768	0.118918	0.309975	0.0780326	0.00509252	1038.62	66.799	64.6713	958.533	39.2783	39.159	1147.7	132.446	126.978	975.576	40.7964	40.6665	16.4826
3294A_60	249.66	1.46434	2.18128	0.182324	5.96045	0.134041	0.264294	0.0861553	0.00536252	1175.09	59.043	57.3749	999.827	42.4573	42.3178	1341.67	122.693	117.938	980.277	46.1153	45.9523	25.4788
3294A_61	379.274	0.715742	0.48226	0.0490293	15.0287	0.354486	0.181785	0.0533897	0.00494328	399.622	33.8671	33.3114	415.272	18.5208	18.4943	345.393	216.545	202.935	411.248	20.0213	19.9916	-20.2316
3294A_62	1005.09	3.10717	1.73371	0.12435	6.22696	0.100345	0.416859	0.0740523	0.00390874	1021.13	46.721	45.6701	960.065	39.3964	39.2765	1042.89	108.374	104.706	958.393	39.6684	39.5481	7.94205
3294A_63	573.853	3.09592	0.663879	0.0606385	13.5839	0.264175	0.316939	0.0607218	0.00386984	516.984	37.3459	36.6717	457.908	19.5785	19.5489	629.393	140.363	134.412	455.104	19.7778	19.7476	27.2461
3294A_64	222.483	1.91887	0.865213	0.0838651	12.3626	0.463032	0.266359	0.0747142	0.00539378	632.965	46.1753	45.1488	501.428	26.1017	26.049	1060.82	148.787	141.953	499.398	34.961	34.8664	52.7323
3294A_65	789.584	1.24325	0.56481	0.0492759	14.4704	0.333903	0.316208	0.0582974	0.00424508	454.652	32.2288	31.7253	430.771	19.2969	19.2695	540.956	163.341	155.381	432.137	19.693	19.6644	20.3686
3294A_66	183.485	1.2139	4.67069	0.405249	3.49822	0.072167	0.399719	0.111504	0.00626525	1762.01	73.8912	71.2968	1620.81	64.7712	64.4477	1824.08	103.712	100.213	1800.97	106.649	102.957	11.1436
3294A_67	959.451	4.15206	1.67272	0.121956	6.19777	0.111628	0.431529	0.0742969	0.00382316	998.221	46.8685	45.8111	964.266	40.1513	40.0254	1049.54	105.498	102.018	963.472	40.5427	40.4155	8.12519
3294A_68	2529.91	4.33322	1.60858	0.11028	6.37412	0.0955993	0.458295	0.071083	0.00357768	973.557	43.3864	42.4789	939.44	38.898	38.7795	959.802	104.583	101.179	934.401	38.9898	38.8735	2.12147
3294A_69	3056.62	0.941186	0.515206	0.0343966	14.8414	0.291314	0.452161	0.0563474	0.00301887	421.944	23.182	22.9204	420.346	18.672	18.6436	466.085	120.921	116.523	413.419	19.0343	19.0077	9.8133
3294A_70	293.144	0.600421	1.80242	0.144033	6.26851	0.142452	0.339124	0.0798741	0.00479156	1046.34	52.8689	51.5273	954.15	40.9565	40.8254	1193.88	120.706	116.136	960.711	42.6337	42.4919	20.0799
3294A_71	342.925	2.2249	3.23707	0.283324	4.12032	0.0857395	0.409493	0.0943685	0.00518161	1466.08	69.0576	66.7864	1400.72	57.3966	57.1422	1515.5	105.42	101.859	1408.15	58.2189	57.9583	7.57394
3294A_72	373.458	2.08724	1.93702	0.149354	6.62928	0.136489	0.438836	0.0915727	0.00467319	1093.97	52.3022	50.9888	905.704	38.2464	38.132	1458.54	98.6153	95.5012	861.178	47.3602	47.1895	37.9034
3294A_73	1262.27	3.32291	1.66513	0.111779	6.08264	0.086776	0.440627	0.0716127	0.00352089	995.333	43.0395	42.1461	981.196	39.8539	39.7323	974.955	101.882	98.6459	980.506	40.0315	39.9077	-0.640101
3294A_74	627.524	3.62479	3.15838	0.249388	4.09165	0.05724	0.39191	0.0918969	0.00500944	1447.05	61.8267	60.0001	1409.53	55.0058	54.7721	1465.26	105.36	101.812	1405.21	55.2241	54.9871	3.80289
3294A_75	1083.34	2.79886	1.98846	0.129808	5.57097	0.0808255	0.43369	0.0784592	0.00400205	1111.6	44.5904	43.6325	1064.25	42.9795	42.8368	1158.52	102.865	99.534	1068.4	43.4392	43.2934	8.13725
3294A_76	298.181	2.08381	3.06624	0.250289	4.18409	0.0608744	0.339064	0.089587	0.00556908	1424.3	63.4817	61.5576	1381.5	53.4521	53.2303	1416.74	121.254	116.591	1379.53	53.6667	53.4441	2.48733
3294A_77	320.989	2.51415	2.07279	0.187616	5.48005	0.12312	0.329907	0.0775662	0.00510848	1139.85	62.9625	61.0688	1080.51	45.8552	45.6928	1135.79	133.925	128.34	1075.48	46.1862	46.0212	4.86677
3294A_78	1077.3	4.23365	1.99608	0.13128	5.60403	0.106026	0.443068	0.0767162	0.00392373	1114.18	44.9856	44.0109	1058.46	44.3793	44.227	1113.82	103.836	100.451	1037.89	44.7813	44.6263	4.97027
3294A_79	566.729	2.80881	1.70089	0.128306	5.9952	0.112054	0.357577	0.0731441	0.00457582	1008.86	48.818	47.6718	994.457	41.2716	41.1386	1017.95	129.361	124.176	1002.26	42.094	41.957	2.30763
3294A_80	318.667	1.45356	1.53104	0.139568	6.4437	0.126939	0.287837	0.0702664	0.00466319	942.917	56.7772	55.2329	929.993	38.7563	38.64	936.148	139.165	133.209	923.645	39.8939	39.7694	0.657503
3294A_81	285.84	2.38138	2.23797	0.177533	4.89661	0.0964013	0.37649	0.082227	0.00472641	1193.02	56.4494	54.9224	1197.97	49.0802	48.8926	1250.93	114.604	110.465	1206.64	49.8686	49.6766	4.23382
3294A_82	439.467	0.70991	0.525616	0.0463743	15.1782	0.368376	0.258379	0.0555869	0.00401881	428.896	31.1017	30.6325	411.309	18.5669	18.5416	435.904	165.148	157.067	414.023	19.2577	19.2275	5.64232
3294A_83	287.007	1.25834	0.520176	0.052186	14.877	0.517951	0.356088	0.0509622	0.0037538	425.269	35.1596	34.5612	419.372	21.3202	21.285	239.122	174.426	165.547	419.573	22.6467	22.607	-75.3797
3294A_84	69.3194	1.99105	1.63755	0.223185	6.04015	0.221063	0.152268	0.0757296	0.00832323	984.77	87.7906	84.1521	987.595	48.9031	48.7197	1087.93	228.502	212.745	987.361	49.0493	48.8633	9.22258
3294A_85	824.353	1.75221	2.95897	0.203273	4.39505	0.0795018	0.463117	0.092273	0.00461662	1397.15	52.8158	51.4768	1321.54	54.0773	53.8512	1473.01	96.4604	93.4772	1325.83	54.5011	54.2716	10.2834
3294A_86	438.621	0.710217	0.516473	0.0485562	14.9651	0.363181	0.288744	0.0549089	0.00410297	422.792	32.7747	32.2543	416.983	18.4192	18.393	408.515	171.669	162.969	420.191	18.9479	18.9201	-2.0727
3294A_87	4128.23	1.02885	1.77042	0.11177	6.09934	0.0783938	0.457926	0.076016	0.00372114	1034.67	41.3834	40.557	978.702	39.9209	39.7991	1095.49	99.5832	96.4686	989.882	40.7813	40.6513	10.6609
3294A_88	597.417	2.76094	2.19751	0.170379	5.25218	0.0986903	0.407834	0.0790701	0.00432026	1180.25	54.8385	53.3967	1123.53	46.449	46.2822	1173.89	110.068	106.259	1117.54	46.6375	46.4705	4.29035
3294A_89	506.087	1.02683	3.37589	0.236228	4.13977	0.0781695	0.445637	0.0974823	0.00508371	1498.82	55.5677	54.0878	1394.8	56.7942	56.5438	1576.51	99.225	96.0548	1389.66	57.2989	57.0451	11.5259
3294A_90	569.256	1.25415	0.541718	0.0469899	14.2383	0.276788	0.295463	0.0556399	0.00377261	439.557	31.186	30.7143	437.559	18.8049	18.7775	438.029	154.574	147.471	428.73	18.8739	18.8463	0.107276
3294A_91	179.351	1.67514	0.588831	0.0742778	13.2786	0.27499	0.149695	0.0578522	0.00652099	470.121	48.0328	46.9229	468.061	19.9098	19.8792	524.17	257.259	238.067	468.718	20.3444	20.3109	10.7043
3294A_92	337.148	1.2982	0.548257	0.0536862	14.1478	0.346307	0.223607	0.0580079	0.00446694	443.854	35.5174	34.9069	440.265	19.7443	19.7142	530.059	173.32	164.39	452.028	21.0143	20.9787	16.9405
3294A_93	846.684	2.6202	0.603317	0.0440317	13.3976	0.340158	0.364584	0.0566772	0.0035113	479.337	28.0787	27.6956	464.05	21.3175	21.2824	478.997	139.928	134.068	465.664	21.8851	21.8494	3.1204
3294A_94	705.793	2.47537	1.68408	0.120682	6.21348	0.0817088	0.43064	0.074378	0.00375859	1002.53	46.1748	45.1483	962.001	38.3462	38.2326	1051.74	103.537	100.182	979.671	39.2978	39.1771	8.53254
3294A_95	737.51	2.49412	1.70673	0.119348	6.21417	0.142293	0.445608	0.0731515	0.00394363	1011.06	45.2721	44.2848	961.902	41.8754	41.7398	1018.15	111.149	107.3	961.725	42.1661	42.0286	5.52475
3294A_96	301.687	1.17455	0.596242	0.0604307	13.5312	0.366143	0.29871	0.0574645	0.00411003	474.846	38.8088	38.0811	459.631	21.1845	21.1497	509.404	161.242	153.495	461.046	22.3293	22.2907	9.77084
3294A_97	140.547	1.76967	3.19963	0.258065	4.05353	0.0965757	0.332826	0.0933381	0.00571171	1457.07	63.3733	61.4555	1421.43	59.1589	58.8886	1494.76	118.056	113.613	1418.24	59.4349	59.162	4.90575
3294A_98	670.813	1.88847	1.72142	0.116556	6.25162	0.1112	0.39246	0.07479	0.00406758	1016.55	43.9604	43.0289	956.547	39.5602	39.4379	1062.86	111.387	107.512	954.093	39.7707	39.6497	10.0028
3294A_99	267.795	1.50733	0.547448	0.0513413	13.7836	0.389754	0.2453	0.0522625	0.00402002	443.323	33.971	33.4121	451.499	21.072	21.039	296.911	180.447	170.925	451.18	21.9028	21.867	-52.0655
3294A_100	407.995	1.78641	0.61986	0.0553514	13.4416	0.306407	0.325142	0.0579492	0.00400467	489.76	34.9959	34.4031	462.584	20.3968	20.3645	527.842	155.163	147.968	463.855	20.8726	20.8375	12.3633
3294A_101	302.407	2.64271	2.83208	0.233399	4.66423	0.1122	0.323164	0.0889918	0.00573281	1364.07	62.8048	60.9208	1252.21	53.4647	53.2427	1403.98	125.969	120.946	1252.68	53.6998	53.4756	10.8105
3294A_102	690.701	2.32439	2.04262	0.153468	5.29291	0.113217	0.377193	0.0752644	0.00454866	1129.84	51.872	50.5802	1115.59	47.4029	47.2279	1075.57	123.787	119.017	1121.62	48.6638	48.4795	-3.72044
3294A_103	426.88	2.18247	1.41124	0.11735	7.24262	0.144183	0.329978	0.0719461	0.00454393	893.679	50.0278	48.825	833.749	35.1077	35.0122	984.416	131.303	125.974	833.215	35.8147	35.7142	15.3052
3294A_104	495.671	1.59467	0.625949	0.0554344	14.0745	0.322152	0.291461	0.0599243	0.0039466	493.569	34.9166	34.3263	442.482	19.6125	19.5828	600.841	145.865	139.461	444.029	20.2717	20.2398	26.3562
3294A_105	471.498	2.71252	1.71922	0.134627	6.4037	0.187159	0.402718	0.0725796	0.00460675	1015.73	50.9035	49.6589	935.4	43.4727	43.3252	1002.24	131.607	126.249	961.551	46.2059	46.0396	6.66866
3294A_106	367.925	1.76406	3.26095	0.250589	3.70548	0.0915911	0.425895	0.0934014	0.00512597	1471.79	60.611	58.8541	1540.14	65.3845	65.0548	1496.04	105.644	102.072	1500.24	107.388	103.698	-2.94812
3294A_107	317.887	1.36278	0.623975	0.0632139	13.9031	0.362536	0.225472	0.0595992	0.00495878	492.336	39.9139	39.1444	447.753	20.4323	20.3985	589.053	185.785	175.526	450.508	21.0623	21.028	23.9877
3294A_108	369.677	0.986705	0.582119	0.0602387	13.9604	0.34089	0.214062	0.0570693	0.00513963	465.822	39.0331	38.2969	445.977	20.0515	20.0204	494.211	204.931	192.588	444.195	20.7468	20.712	9.75982
3294A_109	392.664	1.43618	0.582739	0.05444	13.655	0.234118	0.268745	0.0564869	0.00401631	466.22	35.229	34.6283	455.605	18.9903	18.961	471.556	161.33	153.593	458.325	19.2461	19.2174	3.38267
3294A_110	486.615	1.60593	0.630566	0.0581347	13.8835	0.340736	0.21517	0.0594036	0.00466446	496.449	36.5281	35.8826	448.361	20.2552	20.2248	581.918	175.255	166.101	448.145	21.0356	20.9999	22.9512
16051804 (329-04) random, Lettergesh Formation
3294A_22	235.692	1.55051	0.550141	0.0388264	15.6422	0.668121	0.545758	0.0606909	0.00315891	445.089	25.593	25.2744	399.479	18.3203	18.2929	628.298	114.188	110.219	404.576	22.3654	22.3268	36.4189
3294A_98	71.5268	2.22036	0.531106	0.0679922	15.08	0.416586	0.136499	0.0532173	0.00509325	432.543	45.5985	44.5971	413.903	13.5401	13.5273	338.071	224.393	209.817	406.835	15.6756	15.6551	-22.4308
3294A_27	71.5162	2.21956	0.51173	0.0660958	14.9777	0.41261	0.135095	0.0525518	0.00506585	419.612	44.887	43.9163	416.643	13.7824	13.7662	309.495	227.248	212.338	412.233	15.967	15.9458	-34.6203
3294A_108	104.452	1.77364	0.658779	0.0900016	15.0989	0.541791	0.10543	0.0667241	0.00822371	513.867	55.8535	54.3583	413.401	16.3914	16.372	829.174	268.173	247.019	412.544	19.1538	19.1254	50.143
3294A_34	104.473	1.77437	0.643067	0.0885623	15.0945	0.543082	0.105653	0.0661576	0.00820271	504.203	55.4809	54.0051	413.518	16.5311	16.5084	811.367	270.637	249.13	412.854	19.2814	19.254	49.0344
3294A_72	216.9	1.51071	0.521795	0.0407071	15.008	0.527783	0.327835	0.0587746	0.00405373	426.349	27.3441	26.9809	415.828	16.2409	16.219	558.756	154.027	146.922	420.034	18.6614	18.6345	25.5797
3294A_99	209.597	1.51336	0.52696	0.0408161	14.8973	0.522987	0.332521	0.0586409	0.00402332	429.79	27.3243	26.9618	418.819	16.2593	16.2374	553.788	153.332	146.291	423.786	18.5209	18.4943	24.3719
3294A_12	181.955	2.16028	0.517895	0.0368173	14.4264	0.710755	0.479191	0.0550143	0.00320812	423.744	24.7791	24.4806	432.042	22.2846	22.2463	412.804	133.08	127.79	430.279	24.3749	24.3289	-4.66029
3294A_52	350.764	2.26819	0.554663	0.0367792	14.2168	0.25806	0.277888	0.055131	0.00257949	448.047	24.1646	23.8803	438.2	11.4122	11.4021	417.54	106.248	102.848	432.92	12.0357	12.0231	-4.94791
3294A_91	201.668	2.12943	0.580079	0.0418167	14.3606	0.252682	0.219313	0.0591908	0.00331846	464.512	27.0514	26.6958	433.957	11.0142	11.0047	574.122	124.305	119.632	433.192	11.5404	11.5287	24.4139
3294A_69	257.589	3.08352	0.56541	0.0466407	14.2048	0.426796	0.249712	0.057356	0.00426934	455.041	30.4805	30.0299	438.557	15.245	15.2269	505.247	168.105	159.704	434.75	15.861	15.8401	13.1994
3294A_42	109.367	1.5285	0.646727	0.0660387	14.4446	0.619557	0.291787	0.0633069	0.00476372	506.463	41.1338	40.3171	431.514	19.7683	19.7381	718.557	163.936	155.834	434.768	22.5055	22.4663	39.9471
3294A_80	65.6168	1.79024	0.557454	0.0617347	14.1906	0.314383	0.152247	0.0539666	0.00465224	449.868	40.6522	39.8543	438.983	12.5648	12.554	369.658	200.266	188.552	437.369	15.5972	15.5783	-18.7538
3294A_39	53.7887	5.27002	0.546512	0.0813758	13.7345	0.776216	0.137162	0.0531325	0.00745653	442.709	54.1438	52.7376	453.058	26.2727	26.2206	334.46	334.799	303.356	439.999	33.1836	33.0984	-35.4594
3294A_17	40.4684	2.10785	0.586165	0.111697	14.3901	0.768765	0.116695	0.0588255	0.0105412	468.416	72.7923	70.2731	433.095	23.9539	23.9095	560.643	416.527	368.317	441.604	25.6924	25.6413	22.7502
3294A_18	720.647	2.35952	0.552494	0.039991	13.9893	0.503558	0.387505	0.0562584	0.00329397	446.629	26.3253	25.9884	445.086	17.776	17.7515	462.581	132.464	127.206	442.479	18.2674	18.2416	3.78204
3294A_104	203.315	4.96638	0.583167	0.0364295	14.0731	0.289303	0.276631	0.0571752	0.00291508	466.495	23.4999	23.231	442.524	12.0767	12.064	498.297	114.324	110.378	443.915	12.3699	12.3567	11.1927
3294A_109	120.082	2.9238	0.521604	0.0631062	14.0163	0.407384	0.0751358	0.0534547	0.00592066	426.222	42.5541	41.6807	444.257	14.983	14.9642	348.145	260.664	241.186	445.322	15.5922	15.5735	-27.6067
3294A_96	268.831	1.56768	0.567931	0.044343	13.9381	0.236199	0.205134	0.0549338	0.00340157	456.675	28.9212	28.5152	446.664	11.1273	11.1192	409.529	141.576	135.606	445.326	11.6163	11.6059	-9.06765
3294A_88	119.189	1.43294	0.57923	0.0483896	13.9396	0.428087	0.196989	0.0592593	0.0042079	463.967	31.3535	30.8767	446.618	15.7026	15.682	576.635	158.206	150.711	445.883	17.3242	17.2996	22.5476
3294A_73	108.165	2.33627	0.627575	0.0688557	14.2877	0.510773	0.197295	0.0618698	0.00571774	494.584	43.4173	42.5084	436.096	17.2182	17.1968	669.61	204.224	191.836	446.853	18.5983	18.5715	34.873
3294A_24	163.039	2.58967	0.505382	0.0587846	14.0187	0.55673	0.149404	0.0521484	0.0050022	415.339	40.0426	39.2683	444.182	19.1418	19.1149	291.925	226.816	211.978	450.112	19.8836	19.853	-52.1563
3294A_103	112.438	2.67578	0.6076	0.0736175	13.817	0.305007	0.17053	0.0554976	0.00521422	482.045	47.0385	45.9735	450.446	12.7777	12.7651	432.326	216.446	202.775	452.094	12.7816	12.7675	-4.19135
3294A_46	88.8173	3.68981	0.53107	0.0491435	13.7818	0.399517	0.205757	0.0559658	0.00427217	432.519	32.8554	32.3325	451.556	15.3562	15.3394	451.01	174.16	165.188	455.964	16.6319	16.6104	-0.120973
3294A_64	99.2284	2.06158	0.524745	0.0506818	13.5187	0.445353	0.258505	0.0535656	0.00403515	428.317	34.0345	33.4734	460.038	17.067	17.043	352.831	174.837	165.852	456.097	19.6601	19.6301	-30.3847
3294A_43	145.954	2.27016	0.602264	0.0669083	14.1664	0.688846	0.228209	0.0578296	0.00488844	478.67	42.8498	41.9644	439.706	22.3646	22.3273	523.31	190.998	180.214	456.244	24.5394	24.4927	15.9761
3294A_38	359.695	2.99152	0.553868	0.037062	13.622	0.534881	0.363324	0.0573345	0.00342532	447.528	24.3637	24.0752	456.672	19.469	19.4411	504.423	134.236	128.825	456.716	19.4675	19.4381	9.46647
3294A_71	168.367	2.34653	0.609186	0.0591172	13.792	0.500776	0.239368	0.0579107	0.00383944	483.046	37.6494	36.9641	451.236	18.0144	17.9893	526.385	148.748	142.124	458.269	21.622	21.5858	14.2765
3294A_37	725.118	1.97076	0.588802	0.036635	13.5226	0.321806	0.362816	0.0589672	0.00292184	470.102	23.5489	23.279	459.911	13.8478	13.8329	565.887	109.767	106.108	458.297	14.1235	14.1095	18.7274
3294A_41	445.029	2.66161	0.648561	0.0574277	13.6349	0.798247	0.427733	0.0615471	0.00451698	507.593	35.6825	35.0665	456.253	27.2812	27.2237	658.409	161.398	153.567	463.312	27.9466	27.8876	30.7037
3294A_107	139.222	1.96088	0.716903	0.0593614	13.5831	0.302348	0.155475	0.0628144	0.00379928	548.837	35.4135	34.8067	457.932	13.0323	13.0177	701.952	131.455	126.2	464.911	14.1577	14.1421	34.763
3294A_65	166.833	3.08447	0.604497	0.0523701	13.5193	0.389595	0.313933	0.0597994	0.0039307	480.084	33.4151	32.8741	460.02	15.5195	15.5008	596.325	145.686	139.299	468.651	17.2431	17.2215	22.8576
3294A_35	673.198	3.28459	0.588638	0.0377197	13.0807	0.391505	0.388707	0.0559296	0.00281533	469.997	24.2529	23.9667	474.89	16.5316	16.5104	449.575	113.808	109.908	470.462	17.0279	17.0069	-5.63069
3294A_60	205.527	5.08508	0.71492	0.0588088	13.1394	0.529142	0.234953	0.0622306	0.00434774	547.663	35.122	34.5248	472.843	20.4759	20.442	682.043	152.847	145.796	475.234	25.9191	25.8685	30.6726
3294A_32	85.5846	1.93653	0.74708	0.0908869	12.9888	0.736272	0.125899	0.0690467	0.00758096	566.529	53.5215	52.1471	478.126	27.758	27.6969	900.136	235.055	218.581	476.262	36.1675	36.065	46.8829
3294A_75	48.2295	2.00204	0.634482	0.0938433	13.372	0.452958	0.122482	0.0540367	0.00619583	498.884	59.1512	57.4768	464.909	17.5796	17.5571	372.578	269.037	248.307	479.617	20.633	20.6015	-24.7817
3294A_67	101.308	2.56521	1.19351	0.10969	9.21028	0.298513	0.211956	0.0772216	0.0054291	797.587	51.4213	50.1513	664.463	23.9796	23.9336	1126.92	143.368	136.989	556.015	26.5171	26.4642	41.0371
3294A_47	136.487	3.97724	1.49342	0.127209	7.11511	0.21982	0.301936	0.0731576	0.00408753	927.71	52.4748	51.1531	847.748	29.2454	29.1792	1018.32	115.269	111.134	865.604	33.0695	32.9836	16.7504
3294A_2	1031.68	3.90793	1.49787	0.100834	6.87779	0.258586	0.41348	0.0745001	0.00456932	929.519	41.4083	40.5812	875.101	35.0308	34.936	1055.05	126.056	121.118	881.656	37.1837	37.078	17.0556
3294A_23	80.9148	4.76987	1.44941	0.165252	6.64489	0.264313	0.363982	0.0698307	0.00432704	909.626	69.6864	67.3739	903.718	37.6821	37.5735	923.38	130.004	124.796	894.61	43.553	43.4064	2.12939
3294A_92	34.9193	2.17377	1.75084	0.259343	6.66289	0.188633	0.209767	0.0661494	0.005102	1027.47	98.0577	93.5404	901.44	28.9275	28.8614	811.107	165.61	157.302	900.691	30.6831	30.6116	-11.1369
3294A_94	6.93817	1.34253	1.88114	0.542009	6.51383	0.351056	0.0352902	0.0674033	0.0126358	1074.46	200.607	182.56	920.662	49.2447	49.0586	850.261	416.037	367.171	903.429	58.6618	58.3961	-8.27988
3294A_102	42.2406	1.58179	1.54945	0.209629	6.64199	0.201267	0.084909	0.0739556	0.00800044	950.274	85.2551	81.8197	904.086	30.3683	30.297	1040.26	226.425	210.982	911.678	38.2537	38.1419	13.0901
3294A_54	77.5972	4.66636	1.45627	0.129335	6.68813	0.274496	0.377527	0.074599	0.00489925	912.47	54.1814	52.7732	898.264	38.2893	38.1759	1057.72	135.121	129.462	926.059	39.1832	39.0657	15.0753
3294A_13	311.084	8.85313	1.49185	0.0988415	6.53336	0.198961	0.373837	0.0691986	0.00356145	927.072	40.6808	39.882	918.097	31.3499	31.2724	904.666	107.913	104.304	927.96	31.53	31.4518	-1.48465
3294A_1	88.7469	12.0489	1.55143	0.131434	6.4948	0.187772	0.24322	0.0768689	0.00476316	951.064	52.9917	51.6439	923.175	30.4467	30.3749	1117.79	126.179	121.215	932.891	31.8379	31.7607	17.4107
3294A_93	15.6722	2.99158	1.69646	0.392507	6.27798	0.235872	0.115813	0.067831	0.010017	1007.2	153.458	142.672	952.813	37.5247	37.4145	863.393	322.334	292.192	933.315	48.8489	48.6646	-10.3568
3294A_83	121.843	2.56451	1.52429	0.120285	6.31539	0.260659	0.514705	0.0723044	0.00408446	940.203	48.9695	47.8166	947.564	40.2956	40.17	994.521	116.993	112.741	941.64	40.1102	39.9858	4.72158
3294A_56	155.585	1.74426	1.51848	0.110354	6.50689	0.180213	0.316561	0.0710338	0.00392749	937.862	44.9864	44.0114	921.577	29.2912	29.2248	958.385	115.107	110.997	942.675	30.3905	30.3205	3.84057
3294A_105	65.708	1.42148	1.43672	0.150433	6.37582	0.143936	0.154917	0.0691652	0.00512469	904.353	63.6733	61.7378	939.206	25.9998	25.9474	903.673	156.584	149.097	946.58	26.8676	26.8117	-3.93207
3294A_44	152.289	3.65385	1.93374	0.207434	6.3519	0.203362	0.190308	0.0857535	0.0057458	1092.83	73.094	70.5541	942.496	33.1335	33.0474	1332.63	132.453	126.931	950.103	38.7391	38.6217	29.2756
3294A_10	99.9787	2.8011	1.5046	0.203867	6.31072	0.241504	0.295985	0.0678526	0.00639499	932.253	84.3777	81.0115	948.216	38.2554	38.1423	864.056	201.844	189.6	954.722	38.4162	38.3021	-9.74015
3294A_36	65.9611	1.55347	1.5812	0.153223	6.33884	0.224447	0.250231	0.0728071	0.0041285	962.843	61.187	59.3973	944.303	35.837	35.7377	1008.59	117.192	112.923	959.417	40.0846	39.9617	6.37382
3294A_55	63.7955	4.05053	1.77522	0.156853	6.34076	0.232578	0.296689	0.0754803	0.00539299	1036.43	58.215	56.5925	944.037	36.6798	36.5759	1081.32	146.76	140.1	963.153	40.1595	40.035	12.6958
3294A_59	85.4235	4.4185	1.66003	0.13365	6.28245	0.224265	0.325943	0.0753651	0.00424938	993.386	51.6686	50.3864	952.183	36.1894	36.0881	1078.25	115.286	111.135	970.218	39.3781	39.2569	11.6922
3294A_106	314.553	3.92367	1.73176	0.0912959	6.16464	0.0578045	0.351727	0.0765006	0.00269664	1020.41	34.221	33.654	969.077	19.3351	19.3049	1108.2	71.2478	69.6382	975.018	19.4139	19.3847	12.554
3294A_58	122.499	4.17871	1.66192	0.154654	6.11111	0.196576	0.337788	0.0723002	0.00471252	994.107	59.8661	58.1521	976.953	34.2982	34.2059	994.404	135.391	129.729	975.222	36.4204	36.3179	1.75494
3294A_82	104.51	3.6539	1.78616	0.146754	6.11306	0.172202	0.314027	0.0781916	0.00414091	1040.43	54.1995	52.7904	976.665	31.099	31.0243	1151.74	106.974	103.377	975.725	34.5497	34.4562	15.2013
3294A_81	92.1568	3.7133	1.62392	0.128998	6.04879	0.145644	0.208617	0.0728681	0.00422914	979.508	50.5427	49.315	986.287	28.3836	28.3213	1010.29	119.971	115.501	977.215	29.4786	29.4114	2.37564
3294A_28	641.536	6.23607	1.7291	0.112329	6.19995	0.213628	0.514981	0.0759997	0.00332018	1019.41	42.2289	41.3685	963.951	35.8101	35.7109	1095.06	88.7217	86.2416	982.189	37.203	37.0973	11.973
3294A_49	151.482	3.68777	1.67274	0.101744	6.24797	0.191466	0.447664	0.0759901	0.0033878	998.227	39.0253	38.2896	957.066	32.55	32.468	1094.81	90.5706	87.9872	987.106	35.4753	35.3765	12.5817
3294A_100	174.174	5.23316	1.53944	0.135752	6.05	0.102374	0.272889	0.0733162	0.00345059	946.281	55.0186	53.5673	986.103	23.5487	23.5058	1022.71	96.7448	93.8145	987.572	24.3505	24.3047	3.57891
3294A_110	302.156	5.89483	1.70016	0.104547	6.17677	0.148401	0.265513	0.0757083	0.00337029	1008.59	39.6999	38.9387	967.309	27.6959	27.6365	1087.37	90.5369	87.9567	989.905	28.1404	28.0806	11.0413
3294A_53	288.876	4.59304	1.70692	0.104874	6.0097	0.180586	0.43996	0.0728934	0.00325148	1011.13	39.7249	38.9628	992.232	33.1772	33.092	1010.99	91.7801	89.1405	998.532	33.3348	33.2475	1.8555
3294A_40	743.081	8.31796	1.7163	0.124146	5.99616	0.193391	0.481377	0.0731212	0.00326512	1014.64	46.9457	45.8847	994.308	35.0723	34.9772	1017.31	91.7902	89.1491	1004.01	35.3031	35.2079	2.26141
3294A_11	101.549	3.75599	1.76238	0.14813	6.00116	0.273262	0.337642	0.0773844	0.00479271	1031.72	55.1919	53.7317	993.541	45.9847	45.8213	1131.11	125.864	120.92	1004.04	47.6099	47.4348	12.1625
3294A_86	1136.51	6.20637	1.75324	0.0815751	5.92942	0.234675	0.577407	0.0725865	0.0029538	1028.36	30.3097	29.8638	1004.67	41.1099	40.9791	1002.43	83.7306	81.5289	1005.44	41.6102	41.4763	-0.223557
3294A_16	177.014	6.10089	1.65515	0.138458	5.95838	0.236842	0.382641	0.0734106	0.0047233	991.525	53.6515	52.2704	1000.15	41.4014	41.269	1025.31	132.975	127.501	1007.84	41.6052	41.4714	2.45418
3294A_21	28.9004	1.08006	1.61831	0.238768	5.99103	0.18205	0.141436	0.0748251	0.00706296	977.335	94.772	90.5455	995.098	33.7078	33.6212	1063.81	195.926	184.243	1011.24	36.0381	35.9389	6.45886
3294A_31	293.564	2.72843	1.72657	0.108176	5.80544	0.165601	0.270108	0.0758426	0.00404879	1018.47	40.6897	39.8909	1024.51	33.1428	33.0576	1090.92	108.834	105.126	1024.66	33.4192	33.3329	6.08762
3294A_6	25.4991	4.67281	1.39952	0.259059	5.86303	0.229003	0.120609	0.0672144	0.0105899	888.733	112.694	106.767	1015.2	41.4233	41.2906	844.423	346.193	311.695	1025.22	43.0463	42.9032	-20.2239
3294A_4	52.5151	2.51838	2.04386	0.221032	5.70575	0.180207	0.348193	0.0767576	0.00452558	1130.25	75.1044	72.4259	1041.04	36.1615	36.0603	1114.9	119.992	115.494	1036.19	39.029	38.9126	6.62499
3294A_77	71.6472	3.12655	1.88692	0.143634	5.67812	0.185756	0.317391	0.0767207	0.00443056	1076.5	51.1577	49.9008	1045.71	36.8901	36.7834	1113.94	117.498	113.182	1048.74	37.381	37.2729	6.12467
3294A_15	17.0392	1.70496	1.56684	0.257675	5.73679	0.351515	0.219052	0.0762821	0.00883705	957.177	104.577	99.4546	1035.83	61.9069	61.611	1102.48	240.809	223.36	1054.36	62.7975	62.4933	6.04535
3294A_66	170.86	2.96188	1.82804	0.107844	5.66267	0.176762	0.35995	0.078299	0.00381946	1055.58	39.0943	38.3561	1048.35	35.7824	35.6848	1154.47	98.3589	95.3098	1065.33	36.1821	36.0794	9.19244
3294A_45	30.8218	1.63955	1.45256	0.201227	5.55083	0.158774	0.147158	0.0654698	0.00600287	910.932	85.0671	81.6467	1067.81	34.3724	34.2825	789.469	198.576	186.764	1070.69	36.7942	36.6895	-35.2569
3294A_68	228.248	2.88621	2.20551	0.153298	5.4959	0.215898	0.477817	0.080464	0.00436701	1182.79	49.1489	47.9874	1077.64	43.6953	43.5477	1208.38	108.766	105.039	1080.74	45.3488	45.1899	10.8197
3294A_3	140.515	4.53745	1.93668	0.139334	5.45503	0.141554	0.272622	0.0770306	0.00422841	1093.85	48.7568	47.6136	1085.07	32.9704	32.8863	1121.98	111.445	107.554	1082.47	33.8761	33.7874	3.2898
3294A_101	182.207	4.52133	1.88948	0.113272	5.42142	0.0980405	0.265504	0.0775759	0.00363558	1077.4	40.1999	39.4194	1091.26	26.6309	26.5772	1136.03	94.6951	91.8686	1090.08	26.5811	26.5265	3.94134
3294A_70	182.184	4.52062	1.82228	0.11395	5.40569	0.0975022	0.256609	0.0768181	0.00371056	1053.51	41.4158	40.5881	1094.18	27.2932	27.2371	1116.47	97.9334	94.9164	1100.6	27.3259	27.2693	1.99665
3294A_87	134.856	3.26027	1.97529	0.136979	5.31758	0.156258	0.26092	0.0774355	0.00478387	1107.11	47.2939	46.2172	1110.83	36.0284	35.9293	1132.43	125.518	120.6	1101.56	36.7116	36.6076	1.90688
3294A_29	113.919	2.67716	1.96844	0.161792	5.37844	0.258377	0.342127	0.0756492	0.00497005	1104.78	56.1103	54.6015	1099.28	52.7742	52.5589	1085.8	134.597	128.972	1110.46	53.1604	52.941	-1.24083
3294A_57	1185.87	9.73633	2.06397	0.109643	5.30915	0.155098	0.476303	0.076754	0.00324286	1136.94	36.6641	36.0139	1112.45	36.1294	36.0287	1114.81	85.5105	83.2015	1110.84	36.5278	36.4247	0.211158
3294A_19	70.485	2.66005	2.04151	0.244673	5.32544	0.306207	0.229543	0.073119	0.00669257	1129.47	83.3699	80.0818	1109.33	62.2762	61.9766	1017.25	191.161	180.051	1121.15	67.5306	67.1788	-9.05114
3294A_48	196.534	4.48271	2.09686	0.144249	5.21176	0.158796	0.360684	0.0793143	0.00390442	1147.78	47.855	46.7531	1131.52	37.8422	37.7303	1179.99	98.9012	95.8147	1141.66	38.524	38.4078	4.10783
3294A_74	189.645	3.44425	2.20012	0.148237	5.08742	0.16588	0.384385	0.0816385	0.00446201	1181.08	47.5879	46.4985	1156.83	40.3903	40.2641	1236.86	109.094	105.339	1163.05	40.8945	40.7653	6.4701
3294A_76	199.179	2.96272	2.25203	0.139402	4.89888	0.112665	0.375939	0.0810786	0.00342801	1197.42	43.9988	43.0657	1197.46	33.1036	33.0203	1223.35	84.2151	81.961	1189.65	33.0567	32.9735	2.11656
3294A_33	199.234	2.96279	2.26373	0.139046	4.86872	0.11192	0.377598	0.0809091	0.00337948	1201.07	43.7261	42.8045	1204.23	33.0293	32.9448	1219.24	83.2322	81.0307	1190.7	32.8182	32.7336	1.23126
3294A_14	55.6945	2.1272	2.20271	0.20376	4.94169	0.255356	0.409127	0.0827049	0.00583906	1181.9	65.6496	63.5935	1187.98	60.367	60.0856	1262.26	141.146	134.915	1204.46	63.6446	63.3321	5.88436
3294A_7	214.5	5.04873	2.95826	0.1629	4.18327	0.100535	0.504139	0.0904342	0.0032392	1396.97	42.2237	41.3635	1381.74	39.2012	39.081	1434.71	69.1025	67.561	1390.25	39.2674	39.1482	3.69223
3294A_78	147.572	4.45675	3.19894	0.211782	4.16319	0.120521	0.349151	0.0938958	0.00490421	1456.9	51.8696	50.5776	1387.74	43.7524	43.603	1506.02	100.32	97.0918	1392.2	47.7996	47.6231	7.85381
3294A_9	130.778	3.40264	2.95501	0.233475	4.15532	0.114096	0.353306	0.0911435	0.00479354	1396.13	60.843	59.0733	1390.1	42.7753	42.634	1449.6	101.807	98.4932	1406.55	43.8391	43.6904	4.1045
3294A_89	483.129	5.33295	3.30258	0.187132	4.0618	0.0853169	0.424642	0.0961946	0.00367212	1481.66	44.6492	43.6888	1418.83	36.5294	36.426	1551.58	72.5495	70.8421	1421.61	36.8585	36.7545	8.55562
3294A_97	125.508	3.93153	3.53127	0.2521	4.0299	0.0729323	0.352072	0.0950575	0.00383835	1534.25	57.292	55.7201	1428.9	34.0618	33.9722	1529.21	77.0237	75.1041	1430.81	36.3231	36.2199	6.55958
3294A_95	99.2236	4.70495	3.40462	0.207937	4.02976	0.0985892	0.369785	0.0955197	0.00387807	1505.46	48.5099	47.3779	1428.95	40.1028	39.9774	1538.34	77.3553	75.4187	1432.16	40.0927	39.9698	7.11129
3294A_51	179.13	3.83927	3.32087	0.244633	4.0116	0.0869371	0.38728	0.0977309	0.00458676	1485.97	58.3167	56.6891	1434.75	37.9024	37.79	1581.27	89.0932	86.5286	1439.69	38.8152	38.6988	9.26622
3294A_50	168.994	2.31022	3.30873	0.228897	4.01786	0.107191	0.485799	0.0974487	0.00385757	1483.11	54.6704	53.2373	1432.74	42.8387	42.6979	1575.86	75.0246	73.198	1444.9	45.5001	45.3391	9.0819
3294A_63	106.49	2.84424	3.27533	0.26941	3.94332	0.139865	0.36939	0.0951832	0.00626902	1475.21	65.0141	62.997	1456.98	53.0601	52.8426	1531.7	126.623	121.516	1464.1	53.2719	53.054	4.87836
3294A_20	264.488	4.49874	3.43032	0.206753	3.85546	0.122412	0.505244	0.0963319	0.00392732	1511.37	47.9472	46.8411	1486.63	50.09	49.8971	1554.25	77.5171	75.5709	1474.84	50.4653	50.2685	4.3509
3294A_62	112.952	2.61728	3.70227	0.380779	3.80622	0.204269	0.433698	0.0948881	0.00694818	1571.86	83.9343	80.6026	1503.78	76.9432	76.4868	1525.85	141.224	134.903	1513.99	79.2357	78.7519	1.44647
3294A_25	169.089	3.78152	3.58744	0.292146	3.75493	0.177463	0.391099	0.0969486	0.00620755	1546.76	65.7156	63.6551	1522.08	69.8781	69.5012	1566.22	122.459	117.669	1552.66	122.844	118.026	2.81844
3294A_79	74.8872	1.52053	3.58307	0.309304	3.70484	0.0812266	0.285442	0.103441	0.00494249	1545.79	69.7095	67.3958	1540.38	40.3859	40.2608	1686.76	89.4919	86.891	1579.54	101.549	98.2307	8.67817
3294A_90	56.7061	1.67639	4.27639	0.451543	3.66213	0.0791335	0.167109	0.104791	0.00674785	1688.83	88.8082	85.0867	1556.34	40.275	40.1494	1710.65	120.873	116.171	1601.16	138.594	132.479	9.02076
3294A_84	11.7094	1.27095	4.0776	0.584654	3.59234	0.165437	0.257206	0.0957848	0.00895406	1649.83	120.416	113.674	1583.15	70.3995	70.0162	1543.56	181.05	170.781	1602.1	186.613	175.692	-2.56505
3294A_26	42.3415	2.94963	4.71793	0.567389	3.75032	0.159469	0.303856	0.103837	0.00761122	1770.43	103.342	98.3365	1523.74	64.0479	63.7314	1693.81	138.281	132.165	1671.07	146.251	139.436	10.0406
3294A_5	127.213	2.48143	4.50879	0.372279	3.24201	0.0798167	0.221821	0.107438	0.00560152	1732.59	69.8047	67.4849	1733.08	48.6131	48.4306	1756.4	96.9253	93.8722	1744.08	99.2248	96.029	1.32817
3294A_8	546.163	1.54685	4.2828	0.209204	3.4101	0.0804409	0.564247	0.108069	0.00352592	1690.06	40.6136	39.8171	1657.73	45.5857	45.4253	1767.11	60.2039	59.0112	1762.79	60.8804	59.6613	6.18959
3294A_61	190.274	7.84869	5.22741	0.409302	3.1343	0.109972	0.380808	0.110918	0.00525292	1857.1	67.8581	65.6638	1785.09	62.9642	62.6572	1814.52	87.2753	84.7849	1789.61	93.0672	90.2439	1.6217
3294A_30	122.839	5.69879	4.51408	0.342608	3.30961	0.114261	0.470036	0.112965	0.00539249	1733.57	64.0898	62.1291	1701.96	59.9621	59.6847	1847.65	87.6236	85.11	1794.9	89.5873	86.9679	7.88519
3294A_85	65.2735	2.20435	4.53989	0.389377	3.66799	0.150057	0.583593	0.111152	0.00485818	1738.31	72.6514	70.1418	1554.13	62.74	62.4359	1818.33	80.418	78.2985	1798.73	119.186	114.593	14.5295
16051805 (329-05) targetted, Salrock Formation
3295A_1	328.822	1.53657	0.581183	0.06719	13.8317	0.530621	0.276653	0.0565197	0.00541971	465.221	43.6121	42.6952	449.982	23.6715	23.6281	472.841	219.484	205.405	439.782	25.1358	25.0869	4.83435
3295A_2	287.885	1.70882	0.724668	0.095587	12.1539	0.417382	0.223032	0.0593943	0.00568578	553.419	57.0704	55.5104	509.705	25.6441	25.5932	581.58	214.994	201.379	517.682	27.3463	27.2884	12.3585
3295A_3	144.766	1.16333	0.887579	0.0941671	12.1225	0.425142	0.155366	0.0783655	0.00672787	645.068	51.2977	50.0337	510.977	25.6988	25.6477	1156.15	175.222	165.773	511.357	30.0255	29.9557	55.8037
3295A_4	446.355	1.02017	1.98271	0.183889	5.36786	0.131173	0.369432	0.0742734	0.00487105	1109.64	63.5854	61.6547	1101.27	48.0909	47.9111	1048.91	135.109	129.454	1100.42	48.4367	48.2569	-4.99206
3295A_5	192.126	2.96475	0.776086	0.0711424	11.6212	0.374423	0.286743	0.0642439	0.00479791	583.248	41.0846	40.2698	532.133	25.8584	25.8053	749.67	161.839	153.923	531.758	26.5208	26.4649	29.0177
3295A_6	84.1627	1.96587	10.6753	1.30267	2.34763	0.0697473	0.374351	0.163073	0.00995288	2495.28	116.575	110.244	2287.48	95.9034	95.1953	2487.77	104.74	101.07	2474.42	105.659	101.927	8.05083
3295A_7	360.177	2.17705	2.85201	0.299617	4.31276	0.254719	0.492308	0.0875803	0.00695425	1369.34	80.5555	77.4816	1344.29	87.2296	86.6421	1373.29	156.707	149.02	1366.25	91.2264	90.5853	2.11193
3295A_8	302.248	2.13018	0.538807	0.052195	12.8665	0.516906	0.302501	0.0512275	0.00415343	437.638	34.7362	34.1522	482.508	26.1757	26.1226	251.079	192.1	181.376	478.505	28.4041	28.3403	-92.1735
3295A_9	609.044	0.859935	1.71215	0.186208	6.33346	0.409974	0.39556	0.0736457	0.00608847	1013.09	70.9382	68.5437	945.049	67.4656	67.1158	1031.77	171.756	162.727	947.018	68.663	68.2978	8.40545
3295A_10	731.21	1.49048	0.551145	0.0484113	13.4507	0.348433	0.310163	0.0547332	0.0037828	445.746	31.9401	31.4455	462.284	21.3706	21.3367	401.339	158.661	151.204	462.846	21.5078	21.4719	-15.1855
3295A_11	170.458	1.1194	2.86723	0.265792	4.15469	0.104283	0.402291	0.085503	0.00491665	1373.35	71.0135	68.6141	1390.29	59.2792	59.0066	1326.97	113.409	109.338	1370.45	61.2302	60.9407	-4.772
3295A_12	244.211	1.19843	0.676119	0.0766608	12.8244	0.479915	0.186932	0.0571569	0.00553761	524.426	46.9799	45.9175	484.032	25.3394	25.2911	497.593	220.876	206.601	481.482	26.4985	26.4428	2.72518
3295A_13	450.174	2.1908	0.571884	0.052048	13.141	0.308226	0.293862	0.0543222	0.00418969	459.232	33.9026	33.346	472.789	21.0654	21.0297	384.429	178.109	168.775	474.008	21.4219	21.3849	-22.9846
3295A_14	327.579	1.54452	0.617269	0.0714229	13.2041	0.506545	0.26433	0.0557984	0.00540853	488.134	45.3445	44.354	470.611	25.0272	24.9788	444.355	223.068	208.565	465.537	26.484	26.4297	-5.90861
3295A_15	188.404	1.80428	1.22575	0.130435	8.92013	0.274523	0.252979	0.0678561	0.00566533	812.4	60.3937	58.6494	684.967	32.5085	32.4269	864.161	178.134	168.53	683.803	32.6752	32.5913	20.7362
3295A_16	323.656	1.52888	0.615661	0.0636098	13.4669	0.398988	0.295305	0.0576446	0.00486131	487.124	40.3752	39.5879	461.746	22.0202	21.9826	516.281	190.766	180.012	461.457	22.6891	22.6507	10.563
3295A_17	312.126	2.04931	0.638115	0.077344	13.2488	0.898229	0.466084	0.0625309	0.00555415	501.138	48.5165	47.3845	469.077	35.5344	35.4353	692.316	195.288	183.916	470.453	38.6075	38.4923	32.2452
3295A_18	375.124	2.01142	0.631862	0.0606082	12.4269	0.578657	0.389949	0.0555727	0.00432122	497.255	38.0664	37.3661	498.932	29.402	29.3336	435.336	177.989	168.638	503.945	31.4905	31.4124	-14.6083
3295A_19	262.229	1.22681	0.702814	0.0669956	13.0406	0.399097	0.238421	0.060782	0.00509033	540.47	40.3475	39.5614	476.296	22.9043	22.8651	631.527	185.69	175.415	475.049	23.3035	23.26	24.5803
3295A_20	709.481	1.26849	0.565433	0.0438409	14.0938	0.369316	0.312285	0.0560775	0.00345591	455.056	28.6374	28.2392	441.897	20.4954	20.4629	455.44	139.753	133.915	445.388	21.4023	21.3683	2.97367
3295A_21	246.266	2.1506	3.20982	0.301098	4.45614	0.0941787	0.342924	0.100998	0.00622311	1459.53	73.9533	71.3547	1305.13	53.7868	53.5619	1642.54	116.577	112.211	1307.14	56.7114	56.463	20.5415
3295A_22	268.723	2.2843	2.01552	0.202493	5.29852	0.293083	0.387089	0.0707029	0.00594973	1120.75	69.3542	67.0638	1114.5	70.1341	69.7531	948.837	177.187	167.637	1113.97	72.3214	71.9181	-17.4599
3295A_23	159.998	1.06536	0.635352	0.114183	11.0805	0.777204	0.170604	0.0516271	0.00836083	499.424	72.163	69.6864	557.005	42.9141	42.7718	268.931	394.32	351.579	556.403	47.3195	47.148	-107.118
3295A_24	1615.58	2.33899	0.712824	0.0709268	11.7146	0.570111	0.477017	0.0550937	0.00406671	546.422	42.4877	41.617	528.057	32.3225	32.2417	416.028	169.299	160.828	515.297	32.6797	32.5956	-26.9282
3295A_25	125.906	1.30891	0.92835	0.12747	11.7586	0.370555	0.178369	0.069455	0.00694729	666.766	68.2541	66.0344	526.159	25.2239	25.1746	912.283	213	199.374	540.444	27.5784	27.521	42.3251
3295A_26	88.6646	1.27322	0.79199	0.117452	13.4103	0.496742	0.150503	0.0724597	0.00872929	592.3	67.6661	65.484	463.625	23.8306	23.7867	998.88	254.864	235.506	469.468	25.5128	25.4638	53.5855
3295A_27	174.592	1.76912	0.63921	0.0769201	12.1583	0.35571	0.185533	0.0580442	0.00558248	501.817	48.2148	47.0965	509.528	23.8719	23.8292	531.432	217.914	203.98	509.072	24.3247	24.2775	4.12162
3295A_28	160.351	1.79931	11.0017	0.951256	2.03747	0.0466199	0.42788	0.16697	0.00937726	2523.28	82.1174	78.9257	2574.15	99.277	98.5178	2527.5	95.8555	92.7671	2517.07	96.4054	93.2833	-1.84598
3295A_29	298.064	6.09847	0.612905	0.0693317	12.5696	0.374599	0.238558	0.0585289	0.00501209	485.391	44.1228	43.1844	493.478	23.4509	23.4068	549.616	192.685	181.698	492.111	23.7112	23.6676	10.214
3295A_30	336.709	2.51134	2.56401	0.214849	4.52418	0.155589	0.346676	0.0789896	0.00530898	1290.44	62.1517	60.3057	1287.34	62.1012	61.8022	1171.88	136.004	130.236	1284.13	62.4282	62.1263	-9.85301
3295A_31	229.78	1.98861	0.554844	0.0607664	13.2375	0.478471	0.19821	0.0534541	0.00497406	448.165	40.0759	39.3007	469.464	24.1311	24.0861	348.119	217.561	203.824	472.433	25.6827	25.6303	-34.8571
3295A_32	358.462	2.16257	0.653852	0.0620375	13.422	0.557789	0.306501	0.0597302	0.00484459	510.846	38.4498	37.7352	463.239	25.6306	25.5797	593.817	180.826	171.09	470.706	26.6904	26.6352	21.9895
3295A_33	198.42	1.42051	0.63	0.0705222	13.1422	0.455924	0.21632	0.0574296	0.00531894	496.096	44.4128	43.4624	472.745	23.8012	23.7587	508.067	210.434	197.43	474.34	25.5793	25.5287	6.95212
3295A_34	128.681	0.875608	0.586183	0.0822696	14.4057	0.611302	0.12946	0.0598478	0.00751626	468.427	53.3592	51.993	432.641	24.0132	23.97	598.076	284.313	260.954	436.216	25.5642	25.5136	27.6612
3295A_35	258.651	2.41843	2.09233	0.190211	4.96195	0.176056	0.421005	0.0745993	0.00508466	1146.29	63.4374	61.5156	1183.55	58.0031	57.7444	1057.72	140.351	134.256	1171.4	58.7087	58.4415	-11.8962
3295A_36	731.218	1.49048	0.517733	0.0455656	14.0994	0.36524	0.32864	0.0554101	0.0037576	423.636	30.7151	30.2574	441.725	20.0805	20.0493	428.808	154.85	147.727	438.223	20.0714	20.0401	-3.01249
3295A_37	574.768	2.1015	0.612995	0.0517902	13.2506	0.439534	0.37436	0.0558424	0.00381613	485.447	32.8666	32.3431	469.018	23.4942	23.4515	446.106	155.599	148.4	463.49	23.864	23.8214	-5.13588
3295A_38	517.502	1.34796	0.545925	0.0567148	12.9372	0.749284	0.435888	0.0521057	0.00472556	442.323	37.5969	36.9136	479.966	32.5634	32.4828	290.05	214.106	200.837	462.697	34.6115	34.5188	-65.4774
3295A_39	97.0019	1.65506	0.684052	0.102291	13.2967	0.544042	0.145993	0.0638675	0.00827962	529.22	62.6314	60.7577	467.447	25.2902	25.2421	737.247	287.043	263.063	469.485	28.5958	28.5339	36.5956
3295A_40	168.961	1.07442	2.0625	0.218169	5.65163	0.163519	0.299721	0.0742068	0.00542508	1136.45	73.6545	71.0762	1050.24	47.6586	47.4845	1047.1	151.037	144.005	1040.18	48.1663	47.9859	-0.299972
3295A_41	245.829	0.799405	0.627095	0.0617162	13.5097	0.572872	0.313241	0.0556138	0.00448022	494.285	38.8838	38.153	460.335	25.8171	25.7655	436.983	184.534	174.502	468.142	28.1921	28.1291	-5.34385
3295A_42	144.901	1.57336	2.04661	0.237797	5.43326	0.177972	0.302859	0.0824669	0.00676981	1131.17	80.8419	77.7464	1089.07	51.758	51.5522	1256.63	164.879	156.441	1085.91	52.0703	51.8607	13.3339
3295A_43	70.2948	0.849044	1.04968	0.160361	12.3643	0.527875	0.1446	0.0822051	0.00707677	728.725	81.0365	77.9263	501.363	27.7377	27.6768	1250.41	173.292	163.997	487.498	31.604	31.5266	59.9041
3295A_44	425.999	1.80572	0.606821	0.0659944	12.3276	0.393231	0.295391	0.0543487	0.00515033	481.553	42.1373	41.281	502.797	24.8042	24.7566	385.528	220.212	206.117	498.533	25.8397	25.788	-30.4178
3295A_45	653.64	5.26797	1.33626	0.0995733	7.40277	0.175106	0.461365	0.0679972	0.00370257	861.606	43.7441	42.8216	816.807	36.3054	36.2034	868.468	114.945	110.868	804.506	36.6701	36.5647	5.9486
3295A_46	285.81	1.11728	2.14786	0.190859	5.45604	0.20967	0.449566	0.0817929	0.00569488	1164.36	62.5165	60.6491	1084.89	55.9341	55.6938	1240.56	139.589	133.499	1120.33	60.4369	60.1548	12.5489
3295A_47	184.121	1.00466	0.868231	0.0964802	12.9506	0.572541	0.240432	0.0755781	0.00607928	634.606	53.1257	51.7715	479.488	27.3717	27.3123	1083.92	165.66	157.221	473.597	29.9602	29.8921	55.7634
3295A_48	200.035	2.7626	0.598261	0.078299	13.4257	0.428679	0.202342	0.0591277	0.0065925	476.13	50.3631	49.1443	463.115	22.6503	22.6105	571.802	252.259	233.727	463.155	22.759	22.7189	19.0079
3295A_49	604.667	1.56166	0.544024	0.0576787	12.933	0.478966	0.263863	0.0514481	0.00486066	441.074	38.2895	37.5808	480.117	25.3863	25.3364	260.96	224.553	210.027	461.872	26.3786	26.3248	-83.9811
3295A_50	146.201	2.84718	0.804928	0.11143	12.0351	0.587474	0.100483	0.0707372	0.00774296	599.605	63.6741	61.738	514.544	30.9792	30.9037	949.83	232.469	216.3	512.621	37.8899	37.7788	45.8277
3295A_51	113.005	1.49382	4.52689	0.512495	3.13872	0.126968	0.439428	0.10499	0.00695369	1735.92	96.4066	92.0366	1782.89	89.2048	88.5908	1714.14	124.342	119.371	1688.89	125.695	120.623	-4.01123
3295A_52	127.964	1.43556	0.739868	0.0860367	12.3404	0.657892	0.364471	0.055245	0.00498555	562.328	50.842	49.6001	502.297	31.9817	31.9026	422.154	207.994	195.347	501.065	32.0178	31.937	-18.9843
3295A_53	346.581	2.07495	0.644479	0.0704841	13.0304	0.583354	0.307984	0.0591569	0.00532475	505.075	43.9934	43.0605	476.658	27.5798	27.5208	572.876	202.038	189.975	467.891	27.9983	27.9391	16.7956
3295A_54	166.468	1.33662	0.579512	0.0699181	13.2146	0.377905	0.235792	0.0541157	0.00540708	464.148	45.4515	44.4564	470.248	22.0341	21.9965	375.866	233.03	217.314	469.61	23.5565	23.5135	-25.1105
3295A_55	382.49	1.30617	0.584559	0.0742975	14.6222	0.361934	0.194027	0.056877	0.00605747	467.387	48.1766	47.0602	426.442	19.2667	19.2394	486.766	244.117	226.808	424.143	19.4336	19.4028	12.3928
3295A_56	239.415	2.3021	0.614665	0.063622	12.697	0.274477	0.259936	0.0583446	0.00494585	486.498	40.4081	39.6197	488.709	21.2118	21.1756	542.726	190.907	180.12	483.057	22.3503	22.3116	9.95293
3295A_57	64.2717	1.82774	0.668538	0.100489	12.6339	0.461089	0.113978	0.0617072	0.00673497	519.823	62.0919	60.2494	491.059	25.0392	24.9892	663.976	242.867	225.55	508.146	29.3001	29.2337	26.0427
3295A_58	301.359	1.38414	0.609646	0.0705833	12.9809	0.304514	0.205243	0.0543539	0.00513479	483.337	45.0202	44.0437	478.409	21.2772	21.2421	385.743	219.494	205.487	475.439	22.0264	21.9873	-24.0227
3295A_59	697.044	9.30831	1.63961	0.124499	6.52965	0.164891	0.494973	0.0722952	0.00395353	985.564	48.465	47.3354	918.583	41.2876	41.1573	994.262	113.193	109.209	918.061	41.4542	41.3213	7.61154
3295A_60	170.472	0.936852	0.878034	0.0964488	12.254	0.473744	0.175497	0.0681098	0.00605907	639.92	52.8276	51.4879	505.701	26.8234	26.7663	871.898	189.929	179.045	514.454	31.3567	31.2806	41.9999
3295A_61	66.5665	1.96027	0.773334	0.107458	13.1054	0.667781	0.145119	0.0720155	0.0086784	581.674	62.4799	60.6149	474.026	29.1452	29.0809	986.379	255.444	236.014	462.145	31.4762	31.3981	51.9428
3295A_62	111.144	1.18113	0.695647	0.0855302	13.2273	0.429849	0.164459	0.0672098	0.00689488	536.188	51.874	50.5818	469.813	22.9345	22.8938	844.281	221.049	206.464	484.968	25.34	25.2903	44.3535
3295A_63	95.8906	1.81404	0.733214	0.0965313	12.3339	0.614831	0.251788	0.0648858	0.00665258	558.438	57.3539	55.7786	502.551	30.5268	30.4548	770.636	223.589	208.739	493.958	34.1712	34.0794	34.7875
3295A_64	158.651	0.929465	0.947619	0.135204	11.2333	0.269786	0.133354	0.0771374	0.00921192	676.862	71.7405	69.2925	549.746	24.279	24.232	1124.74	247.708	229.261	535.984	26.261	26.2063	51.1226
3295A_65	29.9443	1.28817	1.55253	0.362645	5.73095	0.348165	0.181168	0.0618761	0.00830915	951.5	149.638	139.365	1036.81	68.9459	68.5793	669.829	301.242	275.038	990.166	73.5688	73.1513	-54.7872
3295A_66	144.14	1.61415	2.23927	0.297645	4.88169	0.210281	0.347293	0.076059	0.00682353	1193.43	95.5111	91.2202	1201.31	64.4387	64.1183	1096.62	184.99	174.522	1198.77	65.1541	64.828	-9.54583
3295A_67	240.365	1.0358	0.800307	0.0783106	12.2053	0.418815	0.222492	0.0634143	0.00509726	597.002	44.6551	43.6942	507.64	25.5299	25.4809	722.155	175.328	166.091	496.965	26.8284	26.7727	29.7048
3295A_68	242.555	1.60906	0.599145	0.0636996	13.2809	0.477903	0.190132	0.0548987	0.00514045	476.691	40.8546	40.0489	467.985	24.0594	24.0131	408.099	216.62	202.947	462.15	24.9656	24.9173	-14.6744
3295A_69	222.853	1.39773	1.62336	0.172921	6.46008	0.259032	0.302423	0.0703632	0.00570413	979.292	68.0577	65.8506	927.796	48.9135	48.7287	938.97	170.777	161.893	913.856	50.7697	50.5692	1.19006
3295A_70	346.88	1.05619	0.862426	0.0796732	11.647	0.330537	0.306769	0.0713077	0.00520241	631.446	43.9086	42.9794	530.999	24.8362	24.7885	966.248	152.613	145.468	539.007	28.1172	28.0561	45.0453
3295A_71	339.381	2.7359	0.655991	0.0652887	12.5296	0.337274	0.287463	0.0591882	0.00514141	512.159	40.4321	39.6427	494.996	22.7466	22.7051	574.026	194.72	183.49	493.634	22.8356	22.7952	13.7677
3295A_72	644.08	1.17154	0.578377	0.0537125	12.3847	0.689774	0.500857	0.0539364	0.00414817	463.418	34.8511	34.2629	500.568	33.0867	33.002	368.394	178.102	168.778	499.572	35.1697	35.0726	-35.8786
3295A_73	489.598	2.594	0.556929	0.0588607	13.4722	0.372753	0.258374	0.0529307	0.00450918	449.525	38.7547	38.029	461.571	21.5349	21.4976	325.825	199.406	187.821	455.892	22.1837	22.1441	-41.6622
3295A_74	265.554	1.96842	0.610506	0.0631473	13.1965	0.653385	0.323265	0.0566392	0.00519508	483.879	40.2081	39.4276	470.871	28.6641	28.6005	477.514	209.454	196.59	463.053	30.4967	30.4248	1.39133
3295A_75	195.231	1.87356	2.01511	0.221851	6.72319	0.272865	0.314087	0.0893676	0.0071383	1120.61	76.1207	73.3701	893.891	47.3066	47.1337	1412.05	156.809	149.097	942.998	56.2935	56.05	36.6955
3295A_76	104.308	1.06971	3.4602	0.558578	4.15467	0.12908	0.412304	0.0938284	0.00612854	1518.19	131.318	123.34	1390.3	62.7902	62.4861	1504.66	126.009	120.957	1404.33	64.8907	64.5644	7.60071
3295A_77	128.512	1.77664	0.674478	0.104062	13.1519	0.312459	0.183948	0.0693317	0.00827113	523.432	64.103	62.1414	472.41	20.5416	20.5104	908.625	255.906	236.49	469.863	22.1929	22.1547	48.0083
3295A_78	120.184	1.63803	0.63757	0.0858149	13.1861	0.511082	0.152846	0.0631167	0.0077527	500.801	53.9193	52.5248	471.229	24.7557	24.7083	712.166	272.449	250.785	468.416	26.3175	26.2638	33.8316
3295A_79	289.602	1.91397	2.65627	0.232387	5.18737	0.231176	0.371967	0.09729	0.00733512	1316.39	65.5842	63.5321	1136.39	62.4055	62.105	1572.81	144.598	137.963	1128.72	70.9285	70.5417	27.7473
3295A_80	322.878	1.52833	0.580659	0.0598333	14.1129	0.418122	0.310384	0.0584098	0.00485331	464.885	38.8042	38.0763	441.318	20.7732	20.7385	545.167	186.935	176.579	440.041	21.3698	21.3345	19.049
3295A_81	548.692	1.31097	0.595031	0.057095	13.1886	0.256254	0.313778	0.0557908	0.00444147	474.075	36.6754	36.0248	471.142	19.773	19.7428	444.051	182.068	172.29	469.148	19.991	19.9614	-6.10095
3295A_82	317.798	1.51675	0.614102	0.0586327	13.6226	0.364113	0.325294	0.0605431	0.00445733	486.144	37.2232	36.5529	456.652	20.6006	20.5677	623.04	162.89	154.934	453.261	20.864	20.8288	26.7057
3295A_83	107.472	0.942917	0.644407	0.113299	12.9742	0.400692	0.120252	0.0587804	0.00911634	505.031	71.1929	68.7814	478.646	22.3813	22.3425	558.972	357.362	321.292	479.398	24.4342	24.3879	14.3703
3295A_84	279.56	1.19261	0.60561	0.0622689	13.3436	0.62927	0.271469	0.0571449	0.00478238	480.788	39.7654	39.0018	465.862	27.2578	27.1988	497.131	189.899	179.252	464.395	27.5162	27.4562	6.28988
3295A_85	168.226	1.03804	0.718787	0.0783859	13.287	0.388984	0.335814	0.0649884	0.00465599	549.951	46.843	45.7868	467.777	21.5071	21.4698	773.961	154.471	147.234	449.868	24.0481	24.0048	39.5607
3295A_86	236.22	1.49512	0.62239	0.0717265	13.2086	0.444373	0.239504	0.0562139	0.00533692	491.344	45.3941	44.4016	470.455	22.9751	22.9343	460.826	217.693	203.845	468.759	24.1495	24.1058	-2.08947
3295A_87	381.724	1.30488	0.571261	0.0750444	14.4678	0.358094	0.217021	0.0563574	0.00609293	458.83	49.0836	47.9255	430.846	18.9569	18.9291	466.475	248.845	230.906	422.982	19.166	19.139	7.63807
3295A_88	374.994	1.01415	0.556101	0.0500212	13.2719	0.320434	0.335787	0.055046	0.00392149	448.986	32.905	32.3802	468.289	20.4144	20.3822	414.09	163.299	155.405	471.533	20.8792	20.8455	-13.0888
3295A_89	280.11	2.68152	2.25096	0.234567	5.38098	0.124329	0.373328	0.0819821	0.00550554	1197.09	74.6173	71.9724	1098.8	45.4883	45.3285	1245.09	134.438	128.778	1112.66	47.0325	46.8601	11.7495
3295A_90	712.943	1.2635	0.535443	0.0410618	14.7885	0.387517	0.345105	0.056898	0.00339784	435.416	27.3373	26.9741	421.8	19.3209	19.292	487.582	134.573	129.141	420.503	19.8512	19.8221	13.4914
3295A_91	119.424	1.80373	1.03773	0.138689	12.8407	0.618824	0.155015	0.0852186	0.00822617	722.786	70.3111	67.9577	483.439	28.3038	28.2447	1320.52	193.03	181.528	473.382	35.0954	35.0001	63.3902
3295A_92	198.876	2.75633	0.586827	0.0752247	13.822	0.441297	0.18336	0.0606096	0.00666951	468.84	48.7146	47.5733	450.289	21.8397	21.8042	625.407	246.552	228.765	446.893	22.433	22.3941	28.0006
3295A_93	867.928	3.66812	0.662818	0.0604638	12.1927	0.7768	0.533196	0.060155	0.00445894	516.336	37.2614	36.5901	508.145	36.449	36.3476	609.155	164.416	156.321	505.638	36.3606	36.2569	16.5821
3295A_94	384.711	2.27592	0.670073	0.080007	13.2757	0.77113	0.470662	0.0650623	0.00551949	520.757	49.2353	48.0699	468.161	31.3236	31.2477	776.352	183.683	173.538	467.026	32.3796	32.2999	39.6973
3295A_95	450.184	2.19082	0.538101	0.0489577	13.7671	0.32291	0.315833	0.0550228	0.00417367	437.172	32.5795	32.065	452.022	19.8016	19.7727	413.152	174.193	165.239	445.765	19.9631	19.9322	-9.40831
3295A_96	130.437	1.22963	0.964717	0.137445	11.4246	0.870093	0.336068	0.0799074	0.00945994	685.737	72.305	69.8189	540.915	44.0142	43.863	1194.7	242.908	225.08	569.007	62.3301	62.0288	54.7239
3295A_97	577.321	2.10493	0.589867	0.0485266	13.9011	0.461104	0.388373	0.0567654	0.00374623	470.783	31.2308	30.758	447.812	22.3408	22.3022	482.432	149.185	142.54	444.601	22.9828	22.9419	7.17622
3295A_98	445.552	1.62477	2.16541	0.209744	5.16742	0.388435	0.639907	0.0799305	0.00594016	1170.01	68.4204	66.1903	1140.42	88.6755	88.0697	1195.27	150.218	143.205	1136.6	88.4701	87.8657	4.58942
3295A_99	361.001	1.76368	0.640148	0.0774147	13.4602	0.79186	0.328368	0.061121	0.00637277	502.398	48.5005	47.3692	461.968	31.1601	31.0864	643.493	232.41	216.523	467.081	32.4065	32.3267	28.2093
3295A_100	36.6427	1.23194	0.972525	0.241633	12.6781	0.692628	0.0737776	0.0819922	0.0154585	689.764	128.356	120.723	489.41	30.7777	30.7044	1245.33	393.416	348.554	491.095	37.5283	37.4194	60.7004
3295A_101	98.5243	1.65461	0.660074	0.0978463	13.9502	0.570782	0.149586	0.0650145	0.0083424	514.659	60.7472	58.9827	446.291	24.073	24.0296	774.804	282.214	258.953	444.883	27.2389	27.1815	42.3995
3295A_102	565.022	1.1805	0.556875	0.0563481	13.0762	0.613663	0.328051	0.0534225	0.00435906	449.49	37.0864	36.4212	475.047	27.6296	27.5719	346.784	190.019	179.456	471.531	29.45	29.3815	-36.9865
3295A_103	489.781	1.37573	0.559234	0.0522955	13.8135	0.649767	0.371075	0.0562039	0.00441016	451.028	34.3441	33.7726	450.557	26.2326	26.1793	460.434	178.863	169.409	444.125	27.3614	27.3021	2.14513
3295A_104	128.72	0.875883	0.562423	0.0783125	15.1038	0.64097	0.136964	0.060715	0.00755259	453.102	51.5422	50.2664	413.272	22.8479	22.8089	629.154	279.985	257.262	413.071	24.108	24.0629	34.3132
3295A_105	388.154	2.35989	1.96708	0.226236	5.76366	0.384914	0.519956	0.0837009	0.00727365	1104.31	78.9364	75.9824	1031.37	73.4649	73.0473	1285.61	174.087	164.693	1044.74	78.6355	78.1587	19.7758
3295A_106	230.679	1.23463	0.560449	0.064652	13.8125	0.811047	0.368835	0.0585252	0.00559728	451.818	42.5108	41.6392	450.588	30.2082	30.1376	549.48	215.977	202.267	447.853	33.9984	33.909	17.9974
3295A_107	315.101	1.17428	0.835674	0.0982798	13.4284	0.427458	0.173608	0.0784892	0.00734325	616.756	55.1032	53.6476	463.024	21.8682	21.8312	1159.28	191.356	180.139	460.805	27.1329	27.0759	60.0595
3295A_108	334.203	1.20589	0.648771	0.0708588	13.276	0.464907	0.300972	0.0634522	0.00565533	507.722	44.1135	43.1755	468.151	23.0879	23.0466	723.421	194.965	183.61	471.421	24.4601	24.4124	35.2866
3295A_109	546.782	1.34036	0.621474	0.0648526	13.6579	0.388833	0.280875	0.0640246	0.00528933	490.771	41.0228	40.2107	455.511	20.7505	20.7172	742.443	179.737	170.031	456.405	21.8807	21.8422	38.647
3295A_110	314.704	1.23706	0.618494	0.0726118	13.6634	0.521508	0.316246	0.0588543	0.00525721	488.903	46.0727	45.0505	455.335	23.4093	23.3669	561.712	200.838	188.921	458.919	25.4026	25.354	18.938
16051805 (329-05) random, Salrock Formation
3295A_64	560.986	8.35194	0.533172	0.0397823	15.4884	0.571403	0.363754	0.0549703	0.00370992	433.913	26.5192	26.1774	403.326	16.2277	16.2072	411.015	154.577	147.486	400.097	17.2294	17.2064	1.87064
3295A_85	44.3704	2.61901	0.510441	0.0776901	14.9406	0.898693	0.0932195	0.0560572	0.00714097	418.746	52.9098	51.5663	417.644	25.5255	25.475	454.633	295.925	270.912	405.951	30.4039	30.3309	8.13612
3295A_103	36.8846	3.25335	0.637701	0.126638	15.0042	0.82229	0.0859	0.0581	0.01	500.882	80.0743	77.0363	415.929	23.4015	23.359	533.44	401.681	356.731	415.986	24.2962	24.252	22.029
3295A_50	37.0917	3.22231	0.632459	0.124602	15.0883	0.819837	0.0833755	0.0584332	0.0100462	497.627	79.0193	76.0593	413.685	23.0385	22.9974	546.044	399.569	355.034	416.888	24.4242	24.378	24.2397
3295A_100	86.6947	2.1973	0.648768	0.0913482	14.4046	0.414861	0.118573	0.0658587	0.00749956	507.721	57.0501	55.4912	432.674	14.4618	14.4441	801.887	248.054	229.876	422.22	15.3168	15.2986	46.043
3295A_53	102.613	2.42208	0.498058	0.0549035	14.4843	0.617128	0.153213	0.0560585	0.00513874	410.387	37.5588	36.8767	430.371	19.5256	19.4947	454.686	210.168	197.238	424.06	21.0942	21.0598	5.34762
3295A_6	135.418	1.93844	0.585592	0.0805047	14.7147	0.479042	0.126654	0.0569623	0.00609726	468.049	52.2193	50.9103	423.848	15.5031	15.4845	490.076	245.257	227.789	426.62	15.8983	15.8773	13.5138
3295A_95	87.7525	2.20561	0.660174	0.0889333	14.2994	0.413706	0.122872	0.0665241	0.0074095	514.721	55.1345	53.677	435.752	14.5771	14.5606	822.91	241.578	224.284	426.863	15.4484	15.4284	47.0475
3295A_90	76.8837	3.8326	0.702098	0.0782346	14.1863	0.474422	0.179822	0.062423	0.00554499	540.043	47.2152	46.1426	439.109	16.3304	16.3097	688.632	195.424	184.038	429.217	22.0611	22.0234	36.2346
3295A_71	103.807	2.42208	0.497071	0.0519268	14.5149	0.636802	0.174791	0.0566006	0.00505874	409.718	35.528	34.9174	429.493	19.8379	19.806	476.006	203.976	191.758	429.422	21.8789	21.8419	9.77152
3295A_48	42.9489	2.0704	0.593612	0.0911477	14.3961	0.557526	0.062543	0.0617664	0.00823334	473.172	58.9221	57.2606	432.921	18.0096	17.9845	666.031	299.11	273.265	430.322	22.8753	22.8363	34.9998
3295A_49	136.646	1.93719	0.580255	0.0787427	14.7716	0.480416	0.134722	0.0570884	0.0060815	464.625	51.2365	49.9756	422.268	15.3325	15.3143	494.949	243.828	226.551	431.372	15.9988	15.979	14.6846
3295A_67	177.743	2.10304	0.492998	0.0442788	14.151	0.404021	0.142038	0.0538223	0.00379488	406.952	30.3394	29.8928	440.168	14.6662	14.6496	363.621	163.038	155.193	432.66	15.3021	15.2853	-21.0513
3295A_108	124.875	2.35204	0.557832	0.0540877	14.2153	0.449748	0.137695	0.0597705	0.00435153	450.114	35.5635	34.9514	438.243	15.654	15.6364	595.277	161.794	153.955	433.634	15.9947	15.9748	26.3799
3295A_57	180.887	2.11166	0.488708	0.0418656	14.2004	0.408792	0.151681	0.0538676	0.0037622	404.03	28.7573	28.3558	438.69	14.5604	14.5454	365.518	161.405	153.711	435.135	15.394	15.3771	-20.0186
3295A_52	87.4291	1.72835	0.667013	0.0735655	14.4074	0.52335	0.212904	0.0623102	0.00512699	518.894	45.3107	44.3218	432.594	17.0952	17.074	684.771	180.718	170.941	436.415	18.135	18.1096	36.8266
3295A_84	109.331	2.83876	0.584825	0.0683822	14.233	0.484014	0.154241	0.0567506	0.00456118	467.558	44.2914	43.346	437.718	16.4777	16.4581	481.855	182.644	172.783	437.011	19.4695	19.4402	9.15975
3295A_28	74.5096	1.88366	0.558718	0.0722539	14.0297	0.559687	0.111918	0.056962	0.00596643	450.692	47.6218	46.5305	443.847	18.9589	18.9311	490.062	239.796	223.071	437.136	22.3793	22.3419	9.43055
3295A_97	92.5391	2.235	0.603516	0.0699715	13.8338	0.77274	0.284383	0.0584858	0.00580953	479.463	44.7981	43.8312	449.917	25.6736	25.6212	548.008	224.674	209.876	438.503	27.7537	27.6926	17.8996
3295A_56	137.324	1.66293	0.51517	0.052677	13.9406	0.47275	0.174476	0.0534391	0.00433194	421.92	35.6117	34.9978	446.587	16.7135	16.6919	347.488	188.716	178.294	438.563	16.7272	16.7054	-28.5189
3295A_38	402.264	3.19154	0.575923	0.0437579	14.1612	0.502223	0.443833	0.0567238	0.00301209	461.838	28.3912	27.9998	439.861	17.1003	17.0778	480.812	119.521	115.218	440.373	18.0031	17.9781	8.51695
3295A_42	112.786	4.81495	0.592212	0.0634164	14.0398	0.657658	0.254828	0.0595886	0.00505273	472.279	40.85	40.0443	443.537	21.6299	21.5936	588.667	189.459	178.802	440.719	23.451	23.4099	24.654
3295A_109	151.663	11.3335	0.573174	0.0671465	14.2977	0.645818	0.234229	0.0583114	0.00580134	460.066	43.8081	42.8826	435.803	20.676	20.6414	541.481	225.296	210.425	441.251	23.3887	23.3478	19.5165
3295A_22	130.104	2.07362	0.600911	0.0547389	14.1488	0.505993	0.235658	0.0586798	0.00464842	477.812	35.0184	34.4248	440.235	17.2431	17.2215	555.237	177.663	168.278	441.926	17.5088	17.485	20.7123
3295A_54	82.4013	2.28847	0.599976	0.0540241	14.1624	0.593573	0.269705	0.0607438	0.00473352	477.218	34.5776	33.9987	439.827	19.52	19.4905	630.175	172.466	163.568	442.368	21.3721	21.3368	30.2055
3295A_9	513.886	2.41852	0.586977	0.0382308	14.1162	0.398125	0.338713	0.056332	0.00283539	468.935	24.6093	24.3148	441.219	14.5273	14.5096	465.476	113.484	109.602	442.384	14.6626	14.646	5.2112
3295A_59	288.36	2.2375	0.56252	0.0438037	14.1903	0.321575	0.288859	0.0576087	0.00287602	453.165	28.6667	28.2676	438.99	12.4714	12.4593	514.913	111.58	107.814	442.418	12.831	12.8196	14.7449
3295A_11	217.718	2.4132	0.727028	0.0597965	14.0808	0.352761	0.165685	0.070863	0.00498968	554.807	35.4643	34.8559	442.289	13.4633	13.4493	953.463	147.458	140.782	442.54	19.9343	19.9035	53.6123
3295A_93	145.521	2.11856	0.528076	0.0606084	14.1697	0.373459	0.195416	0.0524792	0.00516206	430.532	40.6781	39.8792	439.609	13.8138	13.8005	306.346	232.187	216.647	443.983	14.366	14.3501	-43.5008
3295A_32	92.965	2.92514	0.618257	0.0707133	14.5147	0.464443	0.2397	0.0664929	0.00582018	488.755	44.8612	43.8916	429.499	15.4564	15.4393	821.93	188.296	177.622	444.236	17.8056	17.781	47.745
3295A_88	245.052	1.94626	0.585964	0.0481388	13.8735	0.359722	0.177803	0.0562877	0.00359406	468.287	31.0564	30.5883	448.676	13.925	13.91	463.736	144.702	138.45	444.542	14.2858	14.27	3.24764
3295A_66	67.3584	1.62316	0.568507	0.0658833	13.9315	0.450785	0.101571	0.0602439	0.00617306	457.049	43.1041	42.2082	446.869	16.1456	16.1268	612.346	229.472	213.999	444.738	20.4217	20.3894	27.0235
3295A_83	97.2565	1.94316	0.92374	0.108663	13.573	0.626369	0.157409	0.0950632	0.00784002	664.336	58.1796	56.5591	458.264	22.0808	22.0417	1529.33	159.461	151.446	445.294	25.7237	25.6711	70.0349
3295A_39	334.898	2.15697	0.593265	0.0536037	14.3023	0.68921	0.313849	0.0609135	0.00502707	472.951	34.452	33.8773	435.666	21.8261	21.7892	636.181	182.764	172.799	445.514	22.991	22.9501	31.5185
3295A_65	93.3813	2.33788	0.655583	0.0819052	13.8834	0.416864	0.10106	0.0640584	0.00721232	511.908	50.8649	49.622	448.365	15.3308	15.3127	743.558	247.518	229.475	446.55	17.3626	17.3379	39.7001
3295A_101	213.384	1.95659	0.678999	0.0619911	13.6659	0.344724	0.264114	0.0644763	0.00354177	526.169	37.8397	37.1476	455.255	13.9051	13.8915	757.293	118.076	113.805	447.517	16.7614	16.7396	39.8838
3295A_62	168.34	2.43855	0.575097	0.0576352	13.9783	0.361043	0.235937	0.055716	0.00405449	461.305	37.4984	36.8187	445.424	13.7281	13.715	441.068	166.104	157.929	448.018	14.5465	14.5301	-0.987694
3295A_107	69.4619	2.6105	0.69146	0.105207	14.0364	0.428508	0.107991	0.063493	0.00692962	533.677	64.1584	62.1934	443.643	15.4355	15.417	724.787	240.388	223.353	448.307	18.0499	18.0261	38.7898
3295A_33	384.664	9.90752	0.59475	0.0399251	14.0101	0.561075	0.383911	0.058341	0.00327767	473.897	25.5809	25.2627	444.446	19.0376	19.0096	542.593	125.246	120.511	449.134	20.7179	20.6861	18.0885
3295A_87	76.417	2.16549	0.616207	0.074682	13.8786	0.655964	0.120736	0.057613	0.00612013	487.467	47.4693	46.3854	448.516	22.0784	22.0406	515.077	242.259	225.176	449.227	23.265	23.2217	12.9226
3295A_82	208.523	1.83049	0.578789	0.0472556	13.8246	0.368876	0.221289	0.0580708	0.00372773	463.683	30.6216	30.1668	450.207	14.2273	14.2102	532.432	143.764	137.565	449.355	14.3468	14.3295	15.4434
3295A_47	105.529	2.01188	0.648931	0.0725654	14.3471	0.514544	0.16319	0.0657878	0.00562449	507.821	45.1834	44.2	434.351	16.9913	16.9689	799.63	184.452	174.211	449.792	20.8034	20.7699	45.681
3295A_3	179.133	2.88398	0.60102	0.0403805	13.8368	0.471667	0.370445	0.0579606	0.00293743	477.881	25.7725	25.4496	449.825	16.9807	16.9583	528.273	113.04	109.173	449.896	18.7086	18.6801	14.8499
3295A_27	80.7978	3.54125	0.638344	0.0798973	13.5605	0.395727	0.187415	0.057696	0.0057376	501.281	50.131	48.9231	458.67	15.4181	15.4012	518.236	226.108	211.153	450.481	17.629	17.605	11.4941
3295A_8	253.223	2.4479	0.585908	0.0395578	13.8485	0.418782	0.264259	0.0585525	0.00321828	468.251	25.4864	25.1703	449.455	15.5291	15.5105	550.496	122.313	117.792	450.483	17.2057	17.1813	18.3545
3295A_26	212.723	2.02763	0.685521	0.0492326	13.9033	0.380039	0.29012	0.0671719	0.00360877	530.106	29.877	29.444	447.745	14.4007	14.3861	843.107	113.842	109.846	450.498	17.8859	17.8625	46.8935
3295A_86	146.136	1.78231	0.621001	0.0489469	13.9322	0.4067	0.240675	0.0562463	0.00346905	490.475	30.8939	30.4309	446.846	15.0258	15.0097	462.104	139.703	133.867	451.518	16.464	16.4429	3.30185
3295A_17	362.482	3.0309	0.570046	0.0347911	13.6311	0.347225	0.379506	0.0562076	0.00255725	458.044	22.6257	22.3763	456.377	14.0159	14.0007	460.576	102.49	99.3141	451.623	14.3131	14.2958	0.911662
3295A_80	422.794	3.58326	0.576397	0.0374623	13.7536	0.429012	0.30409	0.0571344	0.0030409	462.144	24.2745	23.9878	452.451	15.9265	15.9054	496.725	119.471	115.168	452.302	16.1421	16.1204	8.91319
3295A_68	130.734	1.70096	0.55778	0.0599853	14.0553	0.40304	0.10739	0.0598269	0.00538469	450.081	39.4805	38.7277	443.065	14.6711	14.656	597.322	201.178	189.197	453.878	16.4479	16.4283	25.8247
3295A_60	129.073	3.55309	0.582887	0.0576273	13.9861	0.46706	0.216992	0.058851	0.00483177	466.315	37.3072	36.6341	445.185	16.473	16.4505	561.587	184.122	174.057	454.559	17.4888	17.4651	20.7273
3295A_35	58.2528	1.70219	0.590966	0.0902886	13.7632	0.607052	0.118759	0.0551612	0.00705563	471.484	58.4572	56.8215	452.148	20.9738	20.9397	418.763	299.11	273.633	456.201	22.425	22.3875	-7.97219
3295A_4	73.3531	1.4499	0.663947	0.0868004	13.4814	0.42061	0.114588	0.0676159	0.00748941	517.025	53.6708	52.2889	461.268	16.2858	16.2666	856.803	238.87	221.916	457.692	18.7792	18.7519	46.164
3295A_105	606.854	2.23855	0.637963	0.0501163	13.5921	0.460277	0.262154	0.0586532	0.00368013	501.045	31.3075	30.8321	457.64	17.1766	17.1537	554.249	139.921	134.034	457.726	17.734	17.7081	17.4306
3295A_14	69.835	3.20768	0.64209	0.0810148	13.6742	0.45197	0.122315	0.0594256	0.00581267	503.599	50.7236	49.4875	454.987	16.7692	16.7474	582.723	219.798	205.587	458.048	18.5903	18.5636	21.9205
3295A_45	112.062	4.48671	0.65079	0.0784399	13.5997	0.62434	0.203036	0.063842	0.0067556	508.965	48.83	47.6832	457.395	21.8988	21.8617	736.399	232.346	216.382	458.664	24.9417	24.8922	37.8876
3295A_104	258.087	2.36281	0.587827	0.0466062	13.156	0.389989	0.361791	0.0558623	0.00308618	469.479	30.0245	29.5871	472.269	16.0578	16.0378	446.9	125.185	120.483	459.377	17.3941	17.3692	-5.67666
3295A_19	135.368	1.52713	0.524205	0.0545838	13.4666	0.469193	0.183485	0.0513541	0.00482958	427.957	36.6917	36.0405	461.755	17.6985	17.6757	256.758	223.663	209.252	460.992	19.2167	19.188	-79.8407
3295A_16	90.1854	4.55847	0.789385	0.0929273	13.2569	0.55929	0.317171	0.0699627	0.00597792	590.823	53.428	52.0584	468.802	20.9439	20.9114	927.258	180.603	170.703	461.949	26.4084	26.3558	49.4421
3295A_77	105.079	1.67219	0.850022	0.0927726	13.2877	0.403996	0.0893087	0.0828484	0.00769465	624.661	51.5673	50.2902	467.752	16.1334	16.1133	1265.65	186.969	176.188	462.232	20.1557	20.1243	63.0425
3295A_24	111.098	2.12601	0.588616	0.0673774	13.6207	0.366014	0.165351	0.0564154	0.00579052	469.984	43.5284	42.6149	456.712	14.5154	14.4991	468.752	235.684	219.529	463.084	15.4562	15.4363	2.56837
3295A_41	138.194	3.47434	0.556966	0.0604166	13.6934	0.455718	0.192262	0.0539584	0.00498822	449.55	39.7882	39.0235	454.373	16.7507	16.7289	369.312	215.267	201.792	464.198	17.4727	17.449	-23.0322
3295A_30	140.154	3.9114	0.676528	0.0558129	13.3962	0.475754	0.277356	0.0617359	0.00409725	524.674	34.0875	33.5246	464.097	18.0358	18.0092	664.973	145.432	139.041	466.462	20.3186	20.2866	30.2082
3295A_36	72.1594	2.75753	0.633896	0.0985903	13.3388	0.529636	0.0683522	0.0596756	0.00785594	498.52	62.2122	60.3628	466.025	19.7887	19.7584	591.832	299.002	273.284	467.386	20.8139	20.7818	21.2572
3295A_46	338.496	1.69815	0.571157	0.0396883	13.5341	0.50531	0.376701	0.0560461	0.00294965	458.763	25.8124	25.4887	459.533	18.5244	18.4978	454.197	118.99	114.733	467.98	19.7713	19.741	-1.17498
3295A_18	248.604	2.25476	0.673066	0.0516829	13.1601	0.429602	0.237497	0.0653266	0.00372881	522.575	31.6111	31.1266	472.127	17.2109	17.1894	784.874	122.233	117.654	471.797	19.4806	19.4498	39.8468
3295A_20	74.9132	3.21436	0.663746	0.0794417	13.3055	0.637491	0.27497	0.0649843	0.00677017	516.903	49.0714	47.9135	467.149	23.249	23.2057	773.828	227.209	211.889	472.871	25.7898	25.7397	39.6315
3295A_37	259.029	2.84296	0.639426	0.045352	13.637	0.564012	0.422138	0.0605512	0.0036339	501.951	28.2849	27.8964	456.187	20.0456	20.0144	623.328	132.139	126.855	473.085	23.7956	23.7532	26.8143
3295A_12	186.304	13.1226	0.651498	0.0608034	12.891	0.344541	0.241669	0.0607316	0.00392489	509.4	37.7318	37.0436	481.625	15.2419	15.2239	629.742	142.373	136.255	482.723	17.6196	17.5941	23.5203
3295A_78	56.2322	2.23048	0.690213	0.0890261	12.7718	0.564252	0.116428	0.0629487	0.00711098	532.928	54.1985	52.7898	485.953	22.4916	22.4524	706.498	249.917	231.574	491.587	23.1995	23.1564	31.2167
3295A_63	149.96	3.31585	0.863891	0.0797393	11.1994	0.372057	0.130313	0.071814	0.00438302	632.245	43.9106	42.9812	551.338	20.1572	20.1272	980.674	126.868	121.888	505.847	24.7967	24.7506	43.7796
3295A_29	188.496	2.26921	0.896002	0.0562281	12.8136	0.398123	0.258514	0.080102	0.00426457	649.589	30.3378	29.8913	484.424	16.9939	16.973	1199.5	106.797	103.203	522.456	76.4655	76.0161	59.6145
3295A_73	103.667	1.54945	0.870625	0.134665	10.8809	0.839513	0.051206	0.0714881	0.0105427	635.907	74.445	71.8122	566.789	43.154	43.0086	971.403	316.338	287.089	567.567	45.5482	45.3879	41.6526
3295A_40	135.436	8.64648	1.26757	0.0949258	8.23386	0.442655	0.410093	0.0759209	0.00446609	831.305	42.9574	42.0675	738.902	39.8457	39.7229	1092.98	120.109	115.607	659.406	53.105	52.8871	32.3959
3295A_1	163.737	5.76806	1.22511	0.106408	7.68761	0.179687	0.22437	0.0690163	0.00439917	812.108	49.1471	47.9861	788.318	22.3974	22.3586	899.229	134.324	128.778	782.207	23.1428	23.1013	12.3339
3295A_110	183.075	3.25006	1.45229	0.117475	6.57043	0.182326	0.273371	0.0701957	0.00400536	910.82	49.2332	48.0678	913.267	28.7006	28.6356	934.084	119.314	114.909	909.371	28.5534	28.4918	2.22856
3295A_34	285.91	5.52709	1.62302	0.139519	6.44428	0.315503	0.392766	0.076051	0.00469513	979.162	54.7396	53.3029	929.915	45.5336	45.3721	1096.41	126.11	121.156	935.479	45.7131	45.5502	15.1857
3295A_55	148.756	6.06441	1.48439	0.106139	6.33408	0.169582	0.334452	0.0695256	0.00337893	924.024	43.8498	42.9228	944.962	28.7194	28.6555	914.374	101.646	98.4363	935.841	30.1084	30.0382	-3.34528
3295A_10	131.673	2.73402	1.85604	0.143722	6.12089	0.163786	0.314896	0.0818744	0.00421643	1065.58	51.75	50.4639	975.505	29.7792	29.7105	1242.52	102.602	99.273	964.132	33.7707	33.6826	21.4895
3295A_75	48.8361	2.0554	2.04978	0.3112	6.17016	0.326728	0.11115	0.0795225	0.00950001	1132.22	106.346	101.054	968.272	50.6076	50.4085	1185.17	245.556	227.361	972.496	50.7668	50.5691	18.3011
3295A_89	68.1932	3.88306	1.54034	0.153112	5.98206	0.240092	0.335946	0.0727445	0.00467608	946.638	62.1406	60.2955	996.48	41.0459	40.917	1006.84	133.226	127.737	1003.07	41.2138	41.0812	1.02934
3295A_70	28.3633	1.31884	2.11703	0.291374	6.1437	0.333858	0.303805	0.0906797	0.00795726	1154.37	97.206	92.765	972.144	51.9733	51.7646	1439.88	172.051	162.798	1005.54	68.6661	68.3023	32.4846
3295A_79	111.317	1.11742	1.67708	0.134328	5.90933	0.168443	0.24977	0.073391	0.00445364	999.874	51.5989	50.3207	1007.83	31.8989	31.8203	1024.77	125.272	120.402	1005.74	31.8315	31.7532	1.65266
3295A_21	277.354	54.3067	1.77671	0.140584	5.67131	0.237348	0.442268	0.0749549	0.0040693	1036.98	52.0703	50.7683	1046.87	44.492	44.339	1067.29	111.111	107.253	1046.73	45.1185	44.9623	1.91307
3295A_98	200.792	3.49708	2.12961	0.165481	5.46337	0.198459	0.353761	0.0788655	0.00442616	1158.46	54.4119	52.992	1083.55	40.9765	40.8482	1168.76	113.2	109.177	1049.73	43.1292	42.9865	7.29113
3295A_69	83.7499	4.6871	1.98476	0.191133	5.39359	0.168333	0.378718	0.0774025	0.00462171	1110.34	66.0852	64.0022	1096.44	36.75	36.6457	1131.58	121.246	116.652	1100.84	37.3252	37.2163	3.10566
3295A_102	178.987	2.76617	2.32058	0.186848	5.01499	0.205421	0.342715	0.0812291	0.00481438	1218.6	57.9543	56.3463	1172.11	48.5125	48.3292	1226.99	118.653	114.227	1150.18	48.2882	48.108	4.47297
3295A_31	39.3151	2.4729	3.18133	0.400375	4.70622	0.238319	0.263114	0.0922543	0.00624716	1452.64	99.6306	94.9704	1242.04	61.2206	60.9313	1472.63	131.311	125.844	1251.24	61.6189	61.3258	15.658
3295A_58	150.706	4.60483	2.43513	0.144733	4.65589	0.106129	0.478415	0.0859274	0.00309781	1253.04	43.2381	42.3368	1254.24	33.6363	33.5474	1336.55	70.5122	68.9162	1266.32	34.133	34.0426	6.15824
3295A_2	229.916	4.17249	2.7356	0.165495	4.56308	0.156341	0.375434	0.0925768	0.00439127	1338.18	45.4896	44.4927	1277.38	45.5136	45.3533	1479.24	91.297	88.6196	1290.6	48.0502	47.8731	13.6462
3295A_25	255.802	2.84631	2.66594	0.169281	4.52184	0.118828	0.344326	0.0867806	0.00390467	1319.07	47.4367	46.354	1287.94	37.902	37.7908	1355.63	88.0234	85.5472	1294.7	38.4232	38.3105	4.99289
3295A_23	759.724	3.83498	2.93632	0.180976	4.48826	0.203006	0.365866	0.0915463	0.0050749	1391.32	47.2283	46.1549	1296.67	57.7507	57.4942	1457.99	107.284	103.609	1297.96	58.4788	58.2146	11.0645
3295A_43	536.48	5.88398	3.14031	0.16101	4.06926	0.11693	0.327971	0.0907631	0.00416107	1442.62	39.8757	39.1074	1416.49	43.6427	43.4953	1441.64	88.6481	86.1264	1410.03	45.1426	44.9851	1.74413
3295A_72	352.83	4.19938	3.77414	0.195845	3.93491	0.101041	0.523395	0.105928	0.00372241	1587.26	42.0863	41.2315	1459.77	41.598	41.4643	1730.48	65.1933	63.7994	1497.75	55.1094	54.8735	15.644
3295A_74	165.272	3.62236	3.47097	0.249629	3.77473	0.074313	0.309315	0.092602	0.00438911	1520.64	57.4987	55.9152	1514.96	36.7652	36.6619	1479.76	91.22	88.5467	1505.07	36.7277	36.6248	-2.37883
3295A_76	75.4608	1.6421	4.34482	0.368515	3.59369	0.0709714	0.311943	0.102229	0.00522316	1701.91	71.2439	68.8289	1582.62	38.2908	38.1776	1664.97	96.0646	93.0773	1633.13	100.302	97.0549	4.94626
3295A_91	124.623	2.01736	3.85206	0.371434	3.73159	0.0760763	0.315214	0.107552	0.00497342	1603.7	79.256	76.2787	1530.55	38.0038	37.8921	1758.35	85.7859	83.3854	1637.12	107.92	104.169	12.9551
3295A_81	39.3055	4.9538	5.49068	0.815046	3.22344	0.116667	0.364157	0.10765	0.00569748	1899.14	131.682	123.661	1741.83	62.4757	62.1733	1760.02	98.3707	95.2267	1806.45	102.943	99.4974	1.03385
3295A_61	32.2036	1.21693	5.08531	0.576662	3.12201	0.116189	0.345125	0.116758	0.00834857	1833.66	98.5749	94.0109	1791.23	65.2955	64.9675	1907.17	131.278	125.7	1887.7	131.77	126.155	6.07932
3295A_106	237.542	2.38723	5.72636	0.406338	2.97594	0.119041	0.468408	0.12301	0.00576945	1935.36	62.2846	60.4308	1867.53	72.0365	71.6364	2000.35	84.5129	82.1556	1941.83	88.0904	85.5396	6.63945
3295A_51	238.424	2.36411	5.74866	0.342335	2.9789	0.118855	0.532319	0.124195	0.00535965	1938.72	52.1713	50.8644	1865.92	71.7733	71.3762	2017.35	77.5175	75.5288	1982.3	80.2938	78.1654	7.50628
3295A_44	125.31	1.86854	9.03497	0.679656	2.50616	0.0952078	0.494971	0.168608	0.00803634	2341.55	69.9623	67.6317	2164.51	78.0508	77.5827	2543.88	81.0121	78.7935	2503.11	94.76	91.7438	14.9128
3295A_99	92.6152	1.81903	10.5506	0.728135	2.15824	0.0752812	0.450321	0.175061	0.00813686	2484.37	65.039	63.0208	2454.29	81.3909	80.8804	2606.63	78.4888	76.4004	2552.69	83.8077	81.4352	5.84448
3295A_15	91.2791	1.80538	10.6321	0.626021	2.16475	0.0748609	0.493244	0.176887	0.00767048	2491.51	55.3949	53.9241	2448.15	80.6297	80.1288	2623.89	73.0373	71.2234	2566.84	84.2379	81.8399	6.6978
3295A_94	53.4043	2.05641	11.2627	1.17945	2.27506	0.121981	0.250427	0.175113	0.0114465	2545.12	100.088	95.3856	2348.62	112.462	111.49	2607.12	110.999	106.866	2595.82	112.57	108.325	9.91534
3295A_13	53.5003	2.05062	11.4277	1.13533	2.27019	0.119309	0.247982	0.176912	0.0111924	2558.69	94.9457	90.7039	2352.84	110.641	109.7	2624.14	107.186	103.325	2600.68	107.661	103.77	10.3385
3295A_96	91.6595	2.61626	12.4077	1.10019	2.12812	0.0780097	0.467927	0.182968	0.00833569	2635.76	85.076	81.6549	2483.12	85.4011	84.8397	2679.96	76.3713	74.387	2639.44	80.5255	78.3256	7.345
3295A_7	91.5778	2.61624	12.5424	1.02402	2.12547	0.0767755	0.499175	0.185045	0.00786783	2645.91	78.2678	75.363	2485.68	84.4729	83.9243	2698.61	71.0871	69.363	2655.51	75.4172	73.4829	7.89036
3295A_92	43.429	4.11299	14.343	1.37463	1.94269	0.0554287	0.376889	0.184858	0.00922871	2772.67	93.0721	88.9928	2676.87	75.3009	74.8623	2696.95	83.6623	81.2845	2673.22	84.2526	81.8439	0.744323
3295A_5	43.1127	4.14933	14.5541	1.31265	1.93446	0.0490599	0.359453	0.186631	0.00884728	2786.54	87.5511	83.9323	2686.19	69.8274	69.4518	2712.7	79.266	77.1272	2704.3	80.647	78.4346	0.977219
19091401 (422-01) random, Cregganbaun Formation
4221A_99	382.05	3.29292	1.24753	0.177792	7.11006	0.234119	0.190321	0.0624606	0.00516829	822.291	81.9542	78.7748	848.313	31.0093	30.9364	689.916	181.608	171.734	836.137	30.6649	30.5907	-22.9589
4221A_50	119.437	3.99131	1.34931	0.331128	7.06729	0.351649	0.0486132	0.0673777	0.0125251	867.26	148.409	138.298	853.121	42.7432	42.6032	849.47	412.364	364.31	845.92	42.5029	42.3634	-0.429821
4221A_103	123.852	2.24254	1.3757	0.221579	7.04726	0.344283	0.165618	0.0709301	0.00672108	878.603	96.9832	92.5618	855.393	41.8814	41.7458	955.401	200.041	187.947	850.264	42.3594	42.2207	10.4677
4221A_19	622.435	32.1166	1.276	0.172137	7.01559	0.273384	0.130036	0.0657741	0.00685769	835.07	78.2845	75.3783	859.008	35.3626	35.266	799.194	226.445	211.201	851.067	35.1281	35.0326	-7.48433
4221A_77	27.1482	1.16279	1.87253	1.26815	6.72838	0.445381	0.0700006	0.0575097	0.0132759	1071.43	506.486	405.046	893.247	57.4698	57.2147	511.132	552.221	470.74	854.159	61.3837	61.0929	-74.7585
4221A_44	933.695	1.62747	1.42179	0.148574	6.90436	0.222314	0.260261	0.0704203	0.00500349	898.114	63.2682	61.3564	871.951	30.8984	30.8246	940.632	149.127	142.308	858.334	31.4844	31.4091	7.30162
4221A_76	129.233	0.975767	1.33659	0.226108	6.84974	0.260635	0.0954872	0.0675097	0.00711861	861.748	100.714	95.9542	878.451	34.8942	34.8014	853.537	227.096	211.721	858.671	34.8829	34.7889	-2.91881
4221A_92	241.063	3.64038	1.36004	0.17522	6.88977	0.270322	0.144849	0.0698977	0.0067118	871.886	76.8219	74.0211	873.678	35.4787	35.3813	925.351	203.768	191.255	868.526	36.0997	35.9976	5.58418
4221A_65	123.338	2.89976	1.33587	0.310627	6.83697	0.401416	0.0553018	0.0689607	0.00835661	861.434	139.726	130.728	879.985	50.8775	50.6775	897.564	260.575	240.484	871.683	50.4997	50.3014	1.95852
4221A_106	50.8923	0.992163	1.3433	0.472724	6.91344	0.336347	0.0911144	0.0704263	0.0122609	864.661	215.92	195.153	870.88	42.4072	42.2681	940.808	378.862	337.719	872.368	47.4382	47.2643	7.43278
4221A_93	180.73	2.76905	1.44556	0.257026	6.83148	0.227483	0.0667272	0.0729536	0.00812906	908.032	109.622	104.006	880.646	31.3648	31.2872	1012.66	234.488	217.99	873.584	31.893	31.8142	13.0367
4221A_62	45.8598	2.07792	1.3632	0.442684	6.70524	0.510769	0.0819383	0.0704995	0.0109001	873.248	199.711	181.818	896.124	65.8541	65.5207	942.936	334	301.609	878.841	67.4616	67.1091	4.96451
4221A_23	138.539	1.85112	1.44544	0.37742	6.73215	0.280486	0.116567	0.0637081	0.00821981	907.979	163.087	150.958	892.779	38.7354	38.6192	731.952	285.873	262.086	879.784	39.6731	39.5513	-21.9722
4221A_8	105.488	2.04037	1.5632	0.409405	6.76539	0.274298	0.10115	0.0654127	0.00935178	955.737	169.024	156.03	888.681	37.836	37.7239	787.638	315.424	286.622	881.792	38.2355	38.1237	-12.8286
4221A_81	159.666	1.75558	1.48685	0.340898	6.82068	0.272974	0.0633202	0.0691193	0.0123667	925.031	144.189	134.626	881.949	36.4479	36.3452	902.302	392.473	348.577	884.537	36.6482	36.5444	2.2557
4221A_88	489.724	3.99466	1.3774	0.172614	6.78071	0.267971	0.296163	0.0710655	0.00551046	879.331	75.0941	72.4163	886.806	36.2499	36.1495	959.299	162.631	154.545	886.58	36.3667	36.263	7.55689
4221A_60	140.004	4.16613	1.52551	0.312853	6.6597	0.364171	0.0948166	0.0704721	0.00915206	940.696	129.847	122.041	901.843	48.8725	48.6879	942.141	278.128	255.301	891.842	50.4009	50.2033	4.27723
4221A_37	449.238	5.2309	1.43846	0.197262	6.53558	0.217882	0.11948	0.0667003	0.0056791	905.078	83.8481	80.5228	917.806	33.3211	33.2351	828.429	182.816	172.734	902.06	35.7393	35.6405	-10.7888
4221A_56	58.4841	1.77753	1.29699	0.410431	6.53747	0.452883	0.0604989	0.0613355	0.0165044	844.393	190.053	173.778	917.559	61.6334	61.3389	651.019	637.324	530.384	909.639	62.3129	62.0132	-40.9419
4221A_90	933.692	1.62745	1.55115	0.166396	6.54418	0.210715	0.250501	0.0735647	0.00530516	950.95	67.3315	65.1705	916.683	31.9354	31.8552	1029.55	149.338	142.466	910.256	32.833	32.7482	10.9628
4221A_78	167.46	1.77224	1.33354	0.211659	6.3882	0.208961	0.122671	0.0607837	0.00723139	860.424	94.252	90.0709	937.512	32.9408	32.8567	631.59	267.137	246.372	911.942	34.1928	34.1024	-48.4369
4221A_45	580.802	3.79221	1.55533	0.220725	6.43681	0.156258	0.107977	0.0678525	0.0058167	952.612	89.6576	85.8656	930.919	27.1716	27.1145	864.053	183.048	172.922	915.344	27.6557	27.5965	-7.73864
4221A_24	612.333	4.34593	1.4386	0.180065	6.45593	0.179813	0.240059	0.067755	0.0044635	905.137	76.3945	73.6242	928.353	29.9794	29.9084	861.069	139.773	133.791	917.478	30.0113	29.9416	-7.81398
4221A_100	117.012	1.30543	1.2954	0.357754	6.516	0.242778	0.0446779	0.0669094	0.013004	843.691	164.761	152.391	920.377	35.6885	35.5887	834.955	433.512	380.754	919.232	36.3431	36.2408	-10.2308
4221A_35	222.181	3.34124	1.41263	0.245343	6.40664	0.267101	0.106931	0.0658187	0.00613208	894.264	105.973	100.716	935.001	40.3224	40.1965	800.614	201.512	189.351	921.158	41.2057	41.0731	-16.7855
4221A_10	47.3073	0.808628	1.46572	0.552214	6.4592	0.435836	0.0537867	0.0641478	0.0184619	916.367	241.172	215.547	927.914	61.109	60.8208	746.508	675.335	555.848	922.096	60.7695	60.4844	-24.3005
4221A_82	691.158	1.22848	1.85654	0.20935	6.60873	0.255376	0.237014	0.0864651	0.00701055	1065.76	75.8129	73.084	908.331	36.4729	36.37	1348.6	160.66	152.601	922.299	38.9321	38.815	32.6464
4221A_47	411.432	3.60179	1.49967	0.217288	6.40156	0.192008	0.129745	0.0698711	0.00613502	930.251	90.2391	86.3997	935.691	31.2697	31.1953	924.566	185.823	175.36	923.878	32.845	32.7616	-1.20325
4221A_40	334.33	2.98035	1.3451	0.179676	6.36708	0.241451	0.212989	0.0642345	0.00595616	865.44	79.3255	76.3429	940.406	37.5226	37.4136	749.361	202.222	190.013	928.841	37.5486	37.4396	-25.4945
4221A_68	802.122	3.93889	1.44647	0.157446	6.31999	0.190896	0.152352	0.0675459	0.00527199	908.408	66.4209	64.3171	946.923	31.5782	31.5012	854.653	166.468	158.056	930.182	31.7499	31.6732	-10.7962
4221A_101	122.889	2.03339	1.62939	0.292463	6.44365	0.16448	0.0662884	0.0748164	0.0107326	981.622	116.202	109.911	930	27.2767	27.2179	1063.57	302.87	275.824	930.287	28.3516	28.2893	12.559
4221A_27	928.132	4.30082	1.46065	0.142219	6.27194	0.176057	0.248584	0.0667206	0.00426201	914.275	59.5514	57.8544	953.666	30.8862	30.8123	829.065	136.136	130.466	931.926	33.7801	33.6918	-15.0291
4221A_3	292.114	3.80198	1.616	0.239566	6.3475	0.234156	0.202238	0.0692383	0.00551247	976.44	95.1823	90.92	943.104	37.2724	37.1664	905.849	168.516	159.875	933.716	38.0457	37.935	-4.11268
4221A_49	61.798	1.59982	1.46926	0.426662	6.35458	0.250065	0.068919	0.068045	0.0143657	917.823	183.493	168.279	942.127	38.4914	38.3782	869.925	471.12	409.342	933.889	38.3087	38.1938	-8.29973
4221A_18	232.9	3.17516	1.59093	0.23558	6.32089	0.238676	0.135097	0.070096	0.00773203	966.663	94.4878	90.2862	946.797	37.9338	37.8212	931.165	235.028	218.53	936.953	38.2625	38.1505	-1.67869
4221A_14	277.089	3.17648	1.54062	0.207646	6.28926	0.246626	0.197413	0.0687558	0.0059276	946.752	84.7309	81.3368	951.224	39.2963	39.1769	891.422	183.314	173.143	937.72	40.7505	40.6208	-6.70861
4221A_12	308.643	3.43869	1.36685	0.168483	6.33806	0.253602	0.125026	0.0673036	0.00525446	874.812	73.5976	71.023	944.412	39.6841	39.5623	847.184	166.713	158.28	940.761	41.3908	41.2584	-11.4766
4221A_107	622.435	32.117	1.49771	0.208204	6.33328	0.246795	0.140516	0.0703864	0.00756777	929.457	86.4547	82.9239	945.074	38.0065	37.8962	939.647	228.555	212.916	942.199	38.0035	37.8931	-0.577525
4221A_22	159.844	1.16958	1.59165	0.279135	6.29031	0.249195	0.0963001	0.0677454	0.007748	966.944	112.418	106.519	951.077	39.4927	39.3721	860.774	246.801	228.74	942.227	39.9774	39.8537	-10.4909
4221A_17	99.7962	2.61925	1.50713	0.32083	6.26624	0.25544	0.121311	0.0719234	0.00961936	933.278	134.279	125.948	954.471	40.5475	40.4204	983.775	284.938	260.975	947.363	40.3274	40.2017	2.97869
4221A_86	382.021	3.30606	1.47335	0.221988	6.28747	0.207032	0.104165	0.0667811	0.00602928	919.503	93.2412	89.1469	951.475	33.5248	33.4365	830.954	194.121	182.792	949.162	34.0834	33.9923	-14.504
4221A_38	156.721	2.18281	1.63793	0.265183	6.20725	0.270582	0.0725491	0.0697884	0.00798011	984.916	104.728	99.5909	962.898	42.9221	42.7782	922.135	244.333	226.56	949.982	42.4653	42.3259	-4.42056
4221A_57	179.987	2.47473	1.55602	0.25852	6.22881	0.296132	0.0565666	0.0708426	0.00934271	952.889	105.385	100.185	959.802	45.8544	45.6917	952.874	282.156	258.677	951.745	45.599	45.4383	-0.727011
4221A_15	223.269	3.56252	1.54297	0.223996	6.23313	0.220737	0.1536	0.070578	0.00695417	947.69	91.4689	87.5259	959.182	36.6056	36.502	945.216	208.618	195.506	952.648	36.8755	36.7703	-1.47758
4221A_7	136.414	3.04982	1.61518	0.295021	6.21108	0.283066	0.140973	0.072459	0.010019	976.122	117.904	111.432	962.346	44.8425	44.687	998.861	294.354	268.83	953.518	44.5036	44.3506	3.65573
4221A_105	688.512	2.74505	1.5332	0.200283	6.24378	0.216125	0.130687	0.0694197	0.00664141	943.78	81.9096	78.7334	957.662	35.0228	34.9279	911.239	203.451	190.984	954.885	35.0419	34.9483	-5.09452
4221A_46	290.181	1.73562	1.6178	0.206033	6.20239	0.313948	0.404788	0.0714749	0.00549549	977.136	81.5303	78.3831	963.599	48.6927	48.5094	971.025	160.929	153.002	955.125	48.3976	48.2167	0.76481
4221A_5	157.778	1.76612	1.61381	0.2255	6.19003	0.210145	0.212288	0.0684285	0.00471627	975.591	89.545	85.7629	965.385	35.7649	35.6647	881.561	145.909	139.396	956.399	38.5112	38.3965	-9.50865
4221A_80	240.321	2.43355	1.80532	0.269535	6.04915	0.155828	0.103526	0.0745257	0.00619578	1047.39	99.9792	95.287	986.232	29.185	29.119	1055.74	172.113	163.036	960.021	31.4756	31.3977	6.58359
4221A_26	202.976	3.53587	1.64604	0.264311	6.14582	0.338108	0.133792	0.0710801	0.00782411	988.034	104.046	98.9745	971.832	53.0363	52.8177	959.719	233.458	217.147	962.19	52.6094	52.3943	-1.26222
4221A_34	122.717	3.09061	1.46061	0.29265	6.12819	0.274569	0.0898371	0.0682806	0.010758	914.263	124.503	117.309	974.427	44.4495	44.2953	877.082	344.355	310.145	962.775	44.5725	44.4202	-11.0987
4221A_21	85.6025	1.98256	1.4045	0.309654	6.12935	0.279791	0.105301	0.0693182	0.011641	890.839	135.162	126.725	974.256	45.2939	45.1367	908.225	366.563	327.98	967.649	45.0604	44.9021	-7.27035
4221A_95	113.354	1.79237	1.63895	0.337924	6.13445	0.216716	0.100791	0.0704348	0.00885589	985.307	134.372	126.03	973.504	36.0353	35.9348	941.054	268.925	247.528	970.206	36.5762	36.4714	-3.4482
4221A_64	96.787	2.39499	1.34698	0.222414	6.01518	0.296471	0.0613423	0.0663432	0.00802767	866.253	98.5782	94.0136	991.395	48.6587	48.4744	817.223	263.587	243.137	973.303	51.3788	51.1748	-21.3127
4221A_52	87.443	1.58833	1.53981	0.329879	6.04156	0.308586	0.197167	0.0755762	0.00777221	946.427	136.358	127.776	987.381	50.1015	49.9075	1083.87	213.421	199.616	976.574	50.557	50.3595	8.90205
4221A_104	56.3346	1.97737	1.57993	0.553688	6.09255	0.339755	0.0763708	0.071513	0.0194462	962.343	230.517	206.997	979.715	53.4579	53.2358	972.113	610.535	510.097	977.897	53.4094	53.1902	-0.782049
4221A_66	243.352	2.42111	1.97115	0.289514	5.841	0.150479	0.162416	0.0780883	0.00646658	1105.7	101.432	96.606	1018.74	29.889	29.8198	1149.12	169.019	160.213	1012.94	30.6005	30.528	11.3463
4221A_31	1637.15	5.92991	1.79672	0.174335	5.76098	0.165031	0.233779	0.0718323	0.00464477	1044.27	64.3018	62.328	1031.82	33.6211	33.535	981.193	134.565	128.974	1013.57	34.5632	34.4695	-5.15923
4221A_54	249.734	2.30862	1.78555	0.253905	5.7687	0.154247	0.09767	0.0736283	0.00692192	1040.2	94.7287	90.506	1030.54	31.5423	31.4669	1031.3	196.087	184.405	1022.51	31.4871	31.4092	0.0735966
4221A_109	424.433	3.00764	1.89261	0.24893	5.77011	0.220735	0.130166	0.0816534	0.008721	1078.5	89.3165	85.5533	1030.31	40.5509	40.4251	1237.21	216.918	202.559	1025.75	40.4969	40.3698	16.7239
4221A_55	437.937	3.26957	1.79481	0.228607	5.69398	0.190667	0.163076	0.0730692	0.00576055	1043.58	84.8014	81.4017	1043.02	37.3854	37.2773	1015.87	163.975	155.733	1035.12	37.2685	37.1598	-2.67288
4221A_30	104.154	2.67981	1.58361	0.336947	5.44342	0.279447	0.0564183	0.0690882	0.011384	963.791	136.938	128.285	1087.2	55.296	55.0584	901.375	359.653	322.451	1076.99	54.8809	54.6469	-20.6158
4221A_108	140.454	2.27371	2.06311	0.396368	5.35434	0.226879	0.122601	0.0739327	0.00799635	1136.65	135.834	127.316	1103.82	46.9643	46.7928	1039.63	226.4	210.961	1101.89	46.946	46.7757	-6.1747
4221A_29	111.517	3.44033	2.32222	0.442958	5.0852	0.236239	0.293012	0.0795316	0.00675315	1219.1	140.107	131.061	1157.3	53.7834	53.5588	1185.4	172.496	163.316	1146.08	53.3852	53.1661	2.37068
4221A_98	74.4683	1.99303	2.83437	0.887553	4.90409	0.235611	0.066125	0.0793606	0.0151477	1364.68	249.785	222.399	1196.3	56.2815	56.0355	1181.14	402.486	355.798	1188.46	57.282	57.0288	-1.28308
4221A_102	77.0294	2.63413	2.48023	0.717596	4.74545	0.22414	0.0969973	0.0873778	0.0101364	1266.28	220.961	199.26	1232.7	56.9889	56.7383	1368.84	231.893	215.448	1225.91	56.7889	56.5383	9.9458
4221A_41	254	2.24177	2.45416	0.393143	4.56131	0.173421	0.189763	0.0854614	0.0072746	1258.65	118.987	112.399	1277.83	49.8172	49.6267	1326.03	169.438	160.507	1260.43	50.1985	50.0036	3.63461
4221A_4	154.586	2.63262	2.53289	0.519186	4.59621	0.147065	0.19742	0.0804507	0.00753415	1281.53	154.985	143.991	1269.03	44.0982	43.9479	1208.06	190.169	179.059	1262.38	43.8978	43.7475	-5.04678
4221A_2	61.8702	0.516934	2.51234	0.763215	4.5184	0.196737	0.099942	0.0849587	0.0111013	1275.61	233.57	209.455	1288.83	56.5053	56.2585	1314.6	264.543	243.407	1280.52	56.21	55.9659	1.95992
4221A_96	163.922	1.85435	2.66349	0.437592	4.48652	0.212805	0.0780243	0.0839328	0.0101249	1318.39	125.057	117.8	1297.13	59.9484	59.671	1291	244.227	226.123	1293.74	59.9445	59.6686	-0.474982
4221A_11	406.748	2.02298	2.52696	0.330395	4.39119	0.16679	0.262492	0.0840017	0.00646572	1279.83	97.4178	92.9578	1322.58	51.9578	51.7481	1292.59	153.534	146.178	1307.52	52.3795	52.1688	-2.3203
4221A_42	140.762	1.14856	2.65427	0.502582	4.39657	0.164268	0.0998336	0.0876236	0.00930096	1315.83	144.682	135.056	1321.12	50.593	50.3955	1374.24	211.322	197.576	1309.87	51.4121	51.2066	3.86576
4221A_63	319.906	3.26445	2.6638	0.366515	4.31388	0.148914	0.116899	0.081479	0.00750927	1318.47	104.204	99.1171	1343.98	48.0715	47.893	1233.02	186.372	175.674	1313.63	48.9759	48.7916	-8.9987
4221A_61	239.653	2.77562	2.99414	0.404909	4.3612	0.142311	0.0835158	0.0864181	0.0076902	1406.13	105.636	100.412	1330.8	45.6805	45.518	1347.55	176.82	167.107	1315.61	46.0275	45.8624	1.24292
4221A_13	181.376	2.72168	2.42014	0.357332	4.37953	0.287114	0.460294	0.0880284	0.0081891	1248.6	108.957	103.408	1325.77	82.6714	82.1445	1383.1	184.167	173.635	1317.79	82.2545	81.7331	4.14553
4221A_94	169.173	1.61839	2.93308	0.487193	4.38513	0.178785	0.115554	0.0899509	0.00752727	1390.49	129.84	122.035	1324.23	53.6976	53.4749	1424.49	164.203	155.761	1319.91	53.715	53.4919	7.03783
4221A_75	250.393	3.27173	2.66948	0.43367	4.20718	0.125054	0.204808	0.0868018	0.00745761	1320.05	123.693	116.589	1374.67	43.7104	43.5626	1356.1	170.333	161.298	1339.39	44.7313	44.5778	-1.36959
4221A_20	69.5861	1.28485	2.61889	0.616386	4.28845	0.193772	0.106215	0.0794336	0.0101074	1305.95	180.756	165.974	1351.17	60.6075	60.3228	1182.96	262.334	241.673	1340.06	61.2619	60.9719	-14.2193
4221A_58	204.475	3.86619	2.64353	0.416969	4.25519	0.134649	0.0940512	0.0869162	0.00862402	1312.84	119.659	112.999	1360.69	45.6012	45.4405	1358.64	197.516	185.466	1343.03	45.8843	45.7204	-0.15096
4221A_48	256.395	2.18126	2.57169	0.402654	4.265	0.144905	0.165047	0.083999	0.00717329	1292.62	117.822	111.359	1357.87	48.1241	47.9452	1292.53	170.82	161.763	1343.75	49.4409	49.2535	-5.05489
4221A_97	575.573	4.69733	2.80051	0.366207	4.2802	0.123058	0.227706	0.0873653	0.00668595	1355.67	100.275	95.5559	1353.52	41.8967	41.7599	1368.57	150.989	143.842	1347.6	42.5232	42.3836	1.09955
4221A_74	466.841	3.03839	2.95236	0.374619	4.19061	0.133582	0.113778	0.08989	0.00643425	1395.45	98.597	94.0305	1379.56	46.2061	46.0412	1423.19	139.924	133.747	1364.02	45.9571	45.7939	3.06564
4221A_69	191.846	2.73023	2.94745	0.617775	4.13263	0.117598	0.142909	0.0829527	0.00741118	1394.19	165.469	152.996	1396.96	43.1073	42.9623	1268.1	179.579	169.608	1369.13	43.8302	43.6832	-10.1617
4221A_43	495.387	26.8823	3.1554	0.458822	4.1334	0.135311	0.210675	0.0910907	0.0060936	1446.32	115.328	109.129	1396.73	48.1907	48.0115	1448.5	130.114	124.75	1376.23	49.0512	48.8653	3.57404
4221A_91	169.371	2.77691	3.1214	0.615667	4.15906	0.156189	0.0790612	0.092504	0.0102982	1437.98	157.644	146.284	1388.98	52.4135	52.1999	1477.75	218.837	204.055	1388.63	53.3656	53.1467	6.00736
4221A_110	182.125	2.50585	3.12474	0.483557	4.10816	0.170669	0.232191	0.0864127	0.00795911	1438.8	122.668	115.678	1404.44	57.5223	57.2668	1347.43	183.208	172.8	1397.52	57.3666	57.1115	-4.23117
4221A_67	737.192	4.60607	2.96476	0.349487	4.07139	0.125483	0.292506	0.0891699	0.00585213	1398.63	91.5369	87.5881	1415.83	46.318	46.1521	1407.81	128.317	123.108	1398.27	46.432	46.2654	-0.569466
4221A_28	20.7907	0.711166	3.71525	1.82689	4.06349	0.305819	0.0622877	0.0946696	0.0213184	1574.66	437.276	359.599	1418.3	99.552	98.788	1521.51	457.43	397.107	1398.85	98.4192	97.6746	6.78327
4221A_51	250.795	3.26898	2.91258	0.467622	4.04969	0.120376	0.25908	0.0912617	0.00781203	1385.18	125.133	117.868	1422.64	44.787	44.6321	1452.07	167.433	158.653	1401.58	45.5059	45.3472	2.0269
4221A_25	93.6175	1.61956	3.68868	0.941328	4.03833	0.179591	0.161376	0.0965669	0.0109548	1568.92	214.827	194.259	1426.23	62.7377	62.4337	1558.83	220.703	205.618	1409.91	63.2456	62.937	8.50634
4221A_53	204.526	3.86705	2.89167	0.452363	4.03881	0.127803	0.106861	0.0910316	0.00906128	1379.74	121.596	114.724	1426.07	46.986	46.8167	1447.26	195.725	183.834	1417.24	46.9206	46.7505	1.46407
4221A_59	151.887	1.20791	3.22423	0.427019	3.98206	0.133109	0.134991	0.0933517	0.00716542	1463	105.328	100.133	1444.28	50.0668	49.8742	1495.03	148.825	141.833	1429.68	50.5031	50.3073	3.39464
4221A_16	493.034	5.69969	3.19677	0.311638	3.97836	0.134166	0.340342	0.0925357	0.00564303	1456.38	76.8342	74.033	1445.48	51.4248	51.2218	1478.4	117.901	113.473	1431.46	51.7064	51.4998	2.22673
4221A_39	191.838	2.73015	3.22147	0.672419	3.95282	0.112483	0.181151	0.0873466	0.00780602	1462.34	168.54	155.618	1453.85	44.2664	44.115	1368.15	177.081	167.329	1432.33	45.1679	45.0104	-6.26341
4221A_32	733.457	4.57756	3.2464	0.377747	3.88944	0.119876	0.320244	0.0938117	0.00618166	1468.32	92.3957	88.3743	1475.02	47.6141	47.4378	1504.33	127.153	122.011	1465.47	47.4982	47.3236	1.94798
4221A_85	456.535	1.70802	3.19379	0.460581	3.90086	0.144932	0.138552	0.0937208	0.00722715	1455.66	114.693	108.56	1471.16	54.878	54.6456	1502.49	149.382	142.336	1466.18	55.7494	55.5093	2.0856
4221A_70	118.11	1.21684	3.0607	0.619569	3.83726	0.119792	0.126397	0.0937095	0.00948649	1422.91	161.152	149.299	1492.92	48.8073	48.6219	1502.27	197.667	185.513	1466.3	48.9199	48.7361	0.621794
4221A_33	287.075	4.36005	2.99713	0.388231	3.84491	0.141718	0.200361	0.0859589	0.00672061	1406.89	101.097	96.3016	1490.27	56.0604	55.8163	1337.26	155.024	147.511	1473.93	56.6106	56.3621	-11.4424
4221A_84	422.423	2.16967	3.42393	0.50292	3.883	0.140487	0.172392	0.0978135	0.00894296	1509.9	118.841	112.269	1477.21	53.938	53.7132	1582.85	176.029	166.288	1478.45	54.9546	54.7215	6.67423
4221A_71	248.714	2.72793	3.63496	0.523967	3.78975	0.12886	0.180399	0.0937502	0.00745704	1557.22	118.157	111.659	1509.61	52.5815	52.3677	1503.09	154.195	146.698	1480.95	53.254	53.0363	-0.433974
4221A_73	231.915	1.55606	3.35121	0.480499	3.81479	0.128185	0.159637	0.0889333	0.00722859	1493.07	115.342	109.142	1500.77	51.8002	51.5918	1402.72	159.85	151.847	1484.96	51.5159	51.3109	-6.98969
4221A_1	289.368	2.8435	3.31862	0.463663	3.82715	0.124714	0.349543	0.0929918	0.00740115	1485.44	112.05	106.19	1496.44	51.9049	51.6966	1487.72	154.612	147.082	1486.39	51.6674	51.46	-0.586333
4221A_89	180.522	2.32014	3.23072	0.529861	3.84573	0.136722	0.206593	0.0962605	0.00810285	1464.56	131.324	123.345	1489.99	53.4647	53.2438	1552.86	162.333	154.025	1487.61	53.6008	53.3789	4.04878
4221A_83	161.402	1.79704	3.86216	0.693297	3.8185	0.134274	0.168455	0.104388	0.00915179	1605.81	150.204	139.855	1499.47	53.3933	53.1731	1703.57	165.948	157.214	1496.54	56.2076	55.9638	11.9806
4221A_6	211.282	1.41182	3.37013	0.472309	3.78182	0.102074	0.241518	0.0921357	0.00751435	1497.48	112.816	106.877	1512.43	46.123	45.9599	1470.18	158.918	150.98	1501.89	45.8798	45.7183	-2.87358
4221A_79	132.728	0.860726	3.55454	0.711924	3.60654	0.140669	0.200078	0.0932185	0.0108463	1539.45	165.261	152.818	1577.62	60.7314	60.448	1492.33	228.641	212.542	1512.68	234.533	217.607	-5.71502
4221A_72	232.199	1.81087	3.62523	0.622857	3.6726	0.119116	0.223342	0.0955374	0.00660132	1555.09	141.558	132.33	1552.4	52.0012	51.791	1538.69	132.854	127.242	1548.53	134.918	129.132	-0.890626
4221A_9	330.092	1.7716	3.37561	0.474576	3.62734	0.111181	0.359811	0.0958946	0.00615784	1498.75	113.226	107.246	1569.59	51.8019	51.5934	1545.71	123.157	118.318	1548.85	123.041	118.21	-1.54492
4221A_36	330.264	2.09011	4.4517	0.492512	3.46382	0.117686	0.188847	0.105227	0.00727736	1722.02	93.867	89.7195	1635.02	56.091	55.8479	1718.29	129.888	124.473	1660.45	133.15	127.481	4.84581
4221A_87	194.856	1.59702	8.79685	1.65911	2.39976	0.078958	0.144237	0.156022	0.0112394	2317.17	179.676	165.063	2245.52	71.9503	71.5502	2413	124.988	119.812	2304.94	134.134	128.216	6.94085
19091402 (422-02) random, Bunnamohaun Formation
4222A_25	102.49	1.30517	0.606051	0.187305	14.8561	1.49084	0.151338	0.0649411	0.0179176	481.067	122.012	115.094	419.945	41.4511	41.3183	772.428	641.525	532.614	413.427	41.5914	41.4563	45.6332
4222A_71	249.832	5.62437	0.549451	0.111796	14.4505	1.10772	0.164421	0.0548338	0.00954123	444.637	74.616	71.9713	431.344	32.8103	32.7255	405.453	415.05	367.583	416.207	35.4778	35.3819	-6.38562
4222A_26	464.76	1.34463	0.515442	0.0774754	14.5613	1.08595	0.282356	0.0527863	0.00684431	422.102	52.5853	51.2581	428.17	31.748	31.67	319.622	308.919	281.98	421.043	32.883	32.7993	-33.9614
4222A_59	249.834	5.62459	0.5525	0.1119	14.2238	1.0903	0.160278	0.0548762	0.00951676	446.633	74.5376	71.8985	437.991	33.2486	33.1646	407.184	413.443	366.317	422.685	35.9646	35.8646	-7.56577
4222A_78	585.355	1.16115	0.526839	0.0656115	14.4214	0.991558	0.16535	0.0573446	0.00617426	429.71	44.1087	43.1709	432.186	29.7069	29.6386	504.812	246.117	228.515	430.949	29.6549	29.5884	14.3868
4222A_28	874.3	2.62103	0.53922	0.0724557	14.3916	0.856028	0.18509	0.0575529	0.00729696	437.911	48.3687	47.2433	433.053	26.0261	25.9722	512.783	291.449	267.072	431.641	25.99	25.9377	15.5486
4222A_76	328.565	1.74946	0.583008	0.112781	14.1451	0.878902	0.122801	0.0608582	0.010248	466.393	73.6603	71.0818	440.348	27.4595	27.3997	634.225	384.862	343.171	437.448	27.7208	27.6628	30.5691
4222A_79	874.299	2.62101	0.555122	0.0729851	14.1252	0.840186	0.197285	0.0577731	0.00720022	448.346	48.2221	47.1036	440.945	26.4271	26.3745	521.169	285.839	262.344	439.889	26.3955	26.3416	15.3932
4222A_11	328.568	1.74952	0.587648	0.113092	13.9207	0.864888	0.116594	0.0609725	0.0102288	469.364	73.6476	71.0699	447.206	27.8068	27.7469	638.265	383.063	341.731	443.965	28.0436	27.9813	29.9341
4222A_110	585.358	1.16116	0.535796	0.0647331	13.987	0.961658	0.1701	0.057527	0.00599182	435.649	43.2555	42.3531	445.157	30.4652	30.3933	511.795	237.492	221.055	444.202	30.4107	30.3392	13.0205
4222A_75	308.75	1.6142	0.575104	0.133778	13.4644	1.09373	0.230043	0.0588454	0.0120336	461.31	88.1237	84.4582	461.83	37.0493	36.9432	561.382	479.879	416.978	456.098	37.3753	37.2672	17.7334
4222A_39	308.753	1.61425	0.579454	0.134307	13.2519	1.07642	0.226755	0.0589538	0.0120255	464.111	88.2311	84.5567	468.971	37.5486	37.441	565.392	478.236	415.724	463.16	37.8694	37.7585	17.0538
4222A_83	800.341	6.77811	0.672465	0.0792412	12.0477	0.946973	0.403452	0.0587844	0.00599553	522.21	48.6878	47.5478	514.025	39.7933	39.6708	559.121	230.467	214.913	511.368	39.8311	39.707	8.06558
4222A_47	307.362	11.3092	1.17054	0.185947	8.03983	0.70617	0.367039	0.0673938	0.00983468	786.897	88.9041	85.1749	755.729	64.0146	63.6983	849.966	319.018	289.487	756.063	65.0567	64.73	11.0872
4222A_73	256.862	0.57858	1.61316	0.299904	6.95525	0.436865	0.254794	0.0739336	0.00900964	975.338	120.009	113.311	865.981	52.8826	52.6666	1039.65	256.298	236.688	860.221	58.2654	58.0047	16.7049
4222A_61	623.162	2.68015	1.37387	0.170845	6.94682	0.482079	0.447601	0.0679335	0.00684859	877.822	74.4231	71.7919	866.964	58.1639	57.9027	866.528	216.313	202.309	865.587	59.255	58.9853	-0.050385
4222A_36	212.854	2.03265	1.20847	0.185225	6.87689	0.348986	0.215356	0.0708204	0.00782423	804.489	86.9975	83.423	875.208	44.04	43.8901	952.236	234.628	218.165	873.037	44.5262	44.3717	8.08911
4222A_92	541.542	1.00007	1.40817	0.202636	6.74706	0.40731	0.234541	0.0677361	0.00813494	892.388	87.2891	83.6914	890.937	52.2841	52.0715	860.489	259.698	239.777	884.483	51.9638	51.754	-3.53849
4222A_68	52.4469	2.82145	1.22792	0.447301	6.70206	0.476711	0.0862205	0.0631202	0.0156481	813.389	214.833	194.264	896.522	61.3624	61.0717	712.282	576.133	487.051	884.675	62.0584	61.7599	-25.8662
4222A_57	224.389	1.51859	1.55273	0.24445	6.51777	0.490387	0.322082	0.0737543	0.00901025	951.578	99.6383	94.9775	920.143	66.3734	66.0333	1034.75	257.161	237.429	916.072	66.1379	65.8004	11.0761
4222A_98	315.997	3.62901	1.54012	0.2556	6.49464	0.388524	0.201312	0.0714082	0.00798707	946.55	104.833	99.686	923.197	53.5631	53.3402	969.12	237.022	220.218	917.246	53.6957	53.473	4.73872
4222A_81	63.3969	1.03864	1.44767	0.553651	6.44738	0.495764	0.19193	0.065823	0.0153628	908.907	243.733	217.59	929.498	68.3125	67.9525	800.752	531.301	454.281	927.756	68.2173	67.8583	-16.0782
4222A_41	57.8056	1.9006	1.58647	0.456772	6.36234	0.33135	0.182875	0.0690873	0.00957355	964.911	187.734	171.838	941.058	48.1489	47.9684	901.347	299.634	273.363	934.878	49.3629	49.1733	-4.40567
4222A_99	358.308	2.00967	1.5125	0.228552	6.35043	0.432428	0.300823	0.0693913	0.00755413	935.451	94.5318	90.3263	942.7	61.6665	61.3716	910.396	232.603	216.449	939.714	61.5136	61.2202	-3.54832
4222A_7	120.914	3.67945	1.63194	0.327454	6.32094	0.368822	0.201706	0.0777029	0.0122141	982.609	130.429	122.555	946.791	53.8468	53.6215	1139.29	329.625	297.715	941.788	53.6767	53.4541	16.8962
4222A_60	40.0047	1.69145	1.7372	0.560061	6.23988	0.494034	0.161539	0.0794424	0.0145563	1022.42	219.172	197.805	958.219	72.322	71.9186	1183.18	385.207	342.227	950.579	73.3737	72.9585	19.0132
4222A_19	172.119	1.67284	1.57241	0.246387	6.2462	0.418609	0.346394	0.0698557	0.00824854	959.378	99.6601	94.9971	957.318	61.8313	61.5376	924.114	252.559	233.613	952.821	61.6482	61.3547	-3.59307
4222A_29	28.5956	1.23811	1.63819	0.560803	6.24146	0.642803	0.149016	0.0708713	0.0158887	985.016	228.195	205.124	957.994	93.3258	92.6564	953.705	495.881	427.611	953.388	94.5505	93.8608	-0.449667
4222A_102	69.2439	0.955507	1.73573	0.49839	6.21567	0.402982	0.184388	0.0702482	0.0157668	1021.88	193.955	177.035	961.686	59.9364	59.6577	935.617	497.949	429.209	959.005	59.7989	59.523	-2.78629
4222A_27	122.915	3.2254	1.46049	0.286211	6.20178	0.556623	0.149772	0.0661759	0.0110681	914.212	121.686	114.805	963.687	82.1361	81.6149	811.944	370.778	331.55	960.013	83.4226	82.8851	-18.6889
4222A_105	314.155	3.52597	1.65961	0.226256	6.09072	0.32337	0.267719	0.0738782	0.00788535	993.226	88.2707	84.5932	979.988	50.7104	50.5118	1038.14	223.363	208.324	961.118	51.6384	51.431	5.60186
4222A_22	830.967	6.6902	1.56286	0.179748	6.18245	0.496486	0.321284	0.0711421	0.00754847	955.601	72.4931	69.9942	966.485	74.0625	73.6395	961.499	224.664	209.518	962.328	73.8442	73.4223	-0.518576
4222A_8	149.633	2.51445	1.5228	0.202212	6.08796	0.248817	0.170902	0.0672194	0.00626187	939.606	83.0622	79.7981	980.4	40.6427	40.5151	844.58	200.055	188.034	968.541	44.307	44.1552	-16.0814
4222A_48	981.63	19.4028	1.62122	0.153891	6.07137	0.489505	0.593247	0.071396	0.00539049	978.466	60.5053	58.7545	982.884	75.448	75.0102	968.773	158.009	150.362	968.942	76.0694	75.6219	-1.45667
4222A_24	40.9938	1.49015	2.31137	0.852067	6.10972	0.531477	0.221259	0.0774313	0.0145241	1215.78	279.678	245.782	977.159	80.7135	80.2112	1132.32	398.019	352.414	971.514	80.356	79.8583	13.7029
4222A_40	246.961	3.21672	1.69416	0.284129	6.08243	0.472082	0.366929	0.074603	0.00803643	1006.33	110.01	104.356	981.227	72.6477	72.2393	1057.83	224.825	209.579	972.883	74.801	74.3696	7.24121
4222A_18	108.117	2.8601	1.6311	0.452327	6.12616	0.736582	0.226184	0.0795092	0.017098	982.284	182.522	167.462	974.727	110.414	109.477	1184.84	457.145	397.827	973.724	112.287	111.317	17.7334
4222A_23	62.4025	1.97063	1.85607	0.396164	6.10044	0.572379	0.150327	0.0815059	0.0149555	1065.59	145.966	136.174	978.54	86.9628	86.3789	1233.67	382.868	340.274	974.9	86.7128	86.1348	20.6806
4222A_45	304.07	3.16974	1.7583	0.273499	6.07034	0.496524	0.291908	0.0727141	0.00900424	1030.22	103.261	98.264	983.04	76.4895	76.037	1006	261.987	241.567	980.783	77.0422	76.5832	2.28192
4222A_10	405.151	3.88176	1.71336	0.230159	6.04613	0.333125	0.221295	0.0703881	0.00669105	1013.54	88.0091	84.353	986.688	53.139	52.921	939.697	201.199	188.98	982.65	53.032	52.8147	-5.00065
4222A_30	71.4041	0.893706	2.40889	0.803299	5.92168	0.539907	0.230509	0.0790133	0.0106676	1245.25	254.585	226.195	1005.89	86.7695	86.1881	1172.47	279.532	256.205	986.202	89.5523	88.9345	14.2076
4222A_20	319.012	3.39651	1.77484	0.247937	5.91744	0.347323	0.323765	0.0776853	0.00677901	1036.29	92.8155	88.7582	1006.55	57.2889	57.0355	1138.84	178.647	168.843	991.389	58.2357	57.9725	11.6155
4222A_89	144.424	2.01661	1.46215	0.271397	5.94264	0.490016	0.149876	0.0689684	0.0114888	914.895	115.126	108.948	1002.6	78.3811	77.9076	897.795	364.041	325.98	995.091	78.5059	78.0309	-11.6738
4222A_63	1398.9	8.91501	1.58186	0.197144	6.01764	0.44193	0.4133	0.0700582	0.00674458	963.099	79.051	76.0887	991.02	69.5328	69.1599	930.059	204.16	191.596	998.123	73.6128	73.1936	-6.55453
4222A_42	200.871	2.69557	1.67205	0.307426	5.98809	0.394859	0.36624	0.0707301	0.00764943	997.964	120.317	113.586	995.55	63.0819	62.7749	949.623	229.588	213.803	999.457	65.2818	64.9517	-4.83636
4222A_5	194.993	3.53817	1.76152	0.293764	5.84343	0.350254	0.31974	0.0727867	0.00822588	1031.41	110.993	105.24	1018.35	59.0744	58.8063	1008.02	238.128	221.137	1003.48	60.6133	60.3283	-1.02438
4222A_86	679.307	5.9425	1.79646	0.277468	5.81907	0.369441	0.278728	0.074619	0.00778233	1044.17	103.333	98.3281	1022.29	62.2931	61.9922	1058.26	217.399	203.111	1014.03	61.8796	61.584	3.39871
4222A_15	584.521	3.76629	1.6337	0.239665	5.8021	0.733003	0.430696	0.0721419	0.0106102	983.288	94.567	90.3587	1025.05	121.508	120.373	989.947	314.51	285.555	1019.42	120.949	119.825	-3.54634
4222A_93	319.015	3.39658	1.82581	0.24749	5.72446	0.335995	0.349781	0.077879	0.00642591	1054.78	90.9353	87.0373	1037.89	58.6835	58.4177	1143.79	168.525	159.771	1022.25	59.6302	59.3543	9.2581
4222A_91	91.9062	0.932378	1.93277	0.489925	5.768	0.409304	0.231997	0.0724662	0.0103198	1092.5	177.126	162.909	1030.65	69.6414	69.2661	999.062	303.592	276.514	1027.37	69.4622	69.0889	-3.16217
4222A_17	1483.96	31.0905	1.78354	0.198737	5.68873	0.321091	0.471148	0.0772585	0.0057376	1039.47	73.8209	71.2314	1043.91	57.2578	57.0047	1127.87	151.622	144.506	1031.71	57.5375	57.282	7.44394
4222A_14	437.145	1.89413	1.87474	0.260949	5.7365	0.255457	0.262309	0.0763107	0.00772706	1072.21	94.3265	90.1391	1035.88	45.9641	45.801	1103.23	209.408	196.088	1032.82	47.1595	46.9878	6.10479
4222A_69	351.055	4.28635	1.7899	0.243697	5.72608	0.410856	0.42468	0.0704232	0.00680646	1041.79	90.6886	86.8111	1037.62	70.9262	70.5371	940.719	204.647	192.017	1036.22	70.8878	70.5016	-10.3011
4222A_52	856.312	9.80307	1.87607	0.182535	5.721	0.405138	0.438837	0.0754155	0.00638375	1072.68	65.4875	63.4415	1038.47	70.166	69.7846	1079.6	174.695	165.339	1037.89	70.1854	69.8054	3.80902
4222A_80	641.617	3.36425	1.82895	0.202126	5.66356	0.285463	0.362189	0.0769544	0.00665691	1055.9	73.8759	71.2825	1048.19	51.8437	51.635	1120.01	177.551	167.873	1041.57	52.2466	52.0369	6.41191
4222A_96	45.0438	2.74044	2.10022	0.540855	5.67049	0.531267	0.24637	0.073361	0.0108809	1148.88	185.347	169.836	1047.01	92.2888	91.6327	1023.94	315.623	286.421	1043.25	94.0716	93.3917	-2.25296
4222A_58	170.472	3.73144	1.832	0.303039	5.65378	0.308224	0.146696	0.0784299	0.0112597	1057	111.666	105.844	1049.87	55.5258	55.2879	1157.79	298.783	272.303	1046.73	55.4532	55.2171	9.3209
4222A_101	107.973	3.06454	1.63099	0.351585	5.60744	0.345895	0.384792	0.0683135	0.00755477	982.24	140.434	131.347	1057.87	62.4973	62.1957	878.081	237.662	220.854	1049.21	62.0708	61.7761	-20.4751
4222A_77	289.99	2.72919	1.97176	0.262122	5.62212	0.269498	0.188308	0.0786181	0.00814904	1105.91	91.5965	87.6424	1055.32	49.9067	49.7154	1162.54	212.63	198.867	1059.17	51.605	51.3978	9.22258
4222A_16	856.97	9.83872	1.88582	0.17967	5.62341	0.398226	0.438028	0.0755602	0.00630003	1076.11	64.222	62.2531	1055.1	71.0855	70.6957	1083.44	171.9	162.831	1059.68	72.3984	71.993	2.6162
4222A_4	190.036	4.11059	2.17704	0.384406	5.55199	0.230894	0.157384	0.0826402	0.0100539	1173.73	126.73	119.283	1067.61	44.6482	44.4941	1260.73	247.481	228.939	1064.13	46.962	46.7918	15.3185
4222A_103	437.149	1.89414	1.91614	0.259565	5.5529	0.24728	0.270293	0.0764831	0.0074488	1086.72	92.452	88.4259	1067.45	46.9169	46.747	1107.74	201.009	188.702	1064.43	48.1016	47.9216	3.63793
4222A_87	1483.97	31.0908	1.83571	0.194418	5.49564	0.310191	0.512693	0.077566	0.00531903	1058.33	70.8365	68.4486	1077.69	58.6691	58.4046	1135.78	139.572	133.516	1066.87	59.0061	58.7371	5.1149
4222A_33	308.277	2.25799	2.11017	0.377833	5.48501	0.383112	0.329494	0.0849116	0.00901124	1152.13	127.257	119.751	1079.61	71.8306	71.4313	1313.52	213.114	199.183	1072.65	72.9148	72.5035	17.8079
4222A_95	641.621	3.36429	1.88126	0.19793	5.47788	0.276105	0.38846	0.0770781	0.00630313	1074.51	70.9784	68.5812	1080.9	53.0307	52.8124	1123.21	167.497	158.856	1074.52	53.4035	53.1832	3.76679
4222A_1	110.519	3.28539	1.66765	0.259233	5.45833	0.397827	0.130371	0.0730147	0.0102761	996.291	101.149	96.3493	1084.47	75.1351	74.6998	1014.36	299.143	272.797	1077.11	75.5352	75.0951	-6.91135
4222A_90	3.98007	1.76706	10.4763	13.7146	5.33239	5.25133	0.405341	0.146187	0.145933	2477.83	1848.19	951.311	1108	1043.81	965.591	2301.8	2563.47	1345.38	1083.88	744.01	703.409	51.8637
4222A_37	407.556	4.39797	1.85052	0.322301	5.46072	0.396802	0.429361	0.0756458	0.00746415	1063.62	118.18	111.679	1084.03	74.8448	74.413	1085.71	204.425	191.723	1085.53	76.2096	75.7617	0.155013
4222A_88	290.22	2.72663	2.02919	0.260705	5.43328	0.26044	0.206861	0.0789165	0.00786451	1125.35	89.3242	85.5604	1089.07	51.0426	50.8411	1170.04	203.924	191.227	1100.18	53.7036	53.4795	6.92053
4222A_44	541.634	1.98713	2.4761	0.273291	4.79084	0.289644	0.501107	0.0853155	0.00631898	1265.08	81.4409	78.3005	1222.06	70.2872	69.9048	1322.72	146.962	140.198	1224.07	71.3438	70.9514	7.61038
4222A_43	540.894	2.28377	2.32528	0.303621	4.75326	0.41464	0.483389	0.0838243	0.00812397	1220.04	94.8945	90.6575	1230.85	100.101	99.3302	1288.48	194.722	183.042	1226.5	99.8425	99.0755	4.47226
4222A_109	84.9787	2.31148	2.33255	0.514972	4.73371	0.356283	0.157535	0.0850048	0.0119633	1222.26	163.298	151.138	1235.48	86.9398	86.3565	1315.65	285.866	261.341	1235.09	87.9942	87.3975	6.09343
4222A_107	541.635	1.98712	2.50254	0.271412	4.70708	0.28458	0.499678	0.0855185	0.00621416	1272.77	80.2468	77.1962	1241.84	71.1612	70.7703	1327.32	144.02	137.517	1243.92	72.2019	71.8012	6.44049
4222A_70	173.713	2.38643	2.84193	0.389668	4.51157	0.350554	0.261893	0.0899675	0.00899121	1366.68	105.688	100.459	1290.6	93.4184	92.7465	1424.84	197.147	185.101	1285.65	94.3503	93.665	9.42147
4222A_85	233.427	1.25021	2.75306	0.353711	4.48251	0.34039	0.352434	0.0944687	0.00890326	1342.92	98.0242	93.5095	1298.18	91.8174	91.1667	1517.5	183.221	172.725	1286.86	92.6577	91.9951	14.4528
4222A_9	178.088	3.19221	2.51623	0.38	4.33487	0.241091	0.340693	0.0841453	0.00824508	1276.73	112.809	106.871	1338.1	70.8117	70.4247	1295.92	196.731	184.811	1329.85	71.5426	71.149	-3.25523
4222A_74	396.75	2.29649	3.12455	0.500011	4.28261	0.382162	0.422461	0.0967468	0.0110188	1438.76	126.981	119.507	1352.83	111.396	110.442	1562.32	221.507	206.314	1344.23	114.132	113.13	13.4088
4222A_53	620.361	3.56661	2.95719	0.401133	4.30273	0.367517	0.440767	0.0903403	0.00909741	1396.69	105.628	100.404	1347.12	106.439	105.567	1432.73	198.485	186.275	1348.75	106.62	105.744	5.97557
4222A_65	381.733	3.40051	2.94535	0.392143	4.26893	0.26961	0.333908	0.0888031	0.0090786	1393.65	103.517	98.4951	1356.74	80.3828	79.8848	1399.92	202.531	189.855	1349.22	81.4844	80.9739	3.08425
4222A_97	573.716	2.3162	2.6335	0.297378	4.19873	0.227629	0.494985	0.0854464	0.00580984	1310.04	84.8506	81.4469	1377.16	70.631	70.2475	1325.69	134.588	128.892	1372.9	70.4781	70.0961	-3.88274
4222A_12	321.569	1.44518	3.10439	0.458269	4.19227	0.211459	0.268351	0.0909587	0.00863964	1433.78	116.659	110.32	1379.07	66.669	66.3272	1445.74	186.526	175.696	1375.29	66.6109	66.2697	4.61114
4222A_94	172.423	2.48641	3.3379	0.486376	4.15152	0.203129	0.136328	0.0986544	0.0113595	1489.96	117.163	110.77	1391.25	64.9181	64.5944	1598.84	222.943	207.532	1384.42	64.6807	64.3589	12.984
4222A_67	269.328	1.71719	2.93033	0.43847	4.1337	0.230802	0.398831	0.0938217	0.00831316	1389.78	116.559	110.23	1396.64	73.6095	73.1905	1504.53	172.242	162.94	1391.54	73.4673	73.05	7.17095
4222A_3	200.796	2.6344	2.98163	0.501049	4.05723	0.142383	0.262224	0.0908029	0.00676673	1402.94	131.973	123.918	1420.26	50.3839	50.1879	1442.47	145.427	138.76	1411.97	50.3026	50.1072	1.53972
4222A_64	355.194	2.92179	2.98445	0.432169	4.0173	0.289896	0.428708	0.0908855	0.0100822	1403.67	113.231	107.25	1432.92	95.7162	95.0094	1444.2	219.046	204.261	1422.25	96.5447	95.8257	0.781192
4222A_55	615.454	3.31558	3.30232	0.375775	4.04762	0.302777	0.432154	0.0950583	0.00788841	1481.6	90.6812	86.8038	1423.29	98.4924	97.7443	1529.23	160.482	152.367	1423.55	98.5753	97.826	6.92767
4222A_82	168.232	3.70406	3.24467	0.594476	4.02471	0.25691	0.300686	0.088962	0.00954093	1467.9	147.431	137.448	1430.56	85.0165	84.4584	1403.34	212.718	198.776	1424.2	84.7311	84.1789	-1.93923
4222A_72	367.114	2.20883	3.00592	0.354217	4.01594	0.259647	0.27972	0.0926855	0.00883791	1409.12	91.8288	87.8555	1433.36	86.3011	85.7274	1481.47	186.356	175.526	1430.79	86.2378	85.6636	3.24752
4222A_50	224.045	1.82705	3.43691	0.492875	3.98249	0.190512	0.376592	0.0974348	0.00805247	1512.88	116.048	109.773	1444.14	66.0521	65.7153	1575.59	158.817	150.847	1437.78	65.9222	65.5867	8.34283
4222A_6	206.721	2.6274	3.07138	0.507501	3.97109	0.139356	0.339689	0.0911756	0.00643019	1425.58	130.684	122.781	1447.86	50.9596	50.7603	1450.27	137.302	131.342	1444.19	51.0628	50.8613	0.166727
4222A_13	615.454	3.31556	3.31981	0.372036	3.98054	0.297758	0.431617	0.0952253	0.00777704	1485.72	89.3869	85.6176	1444.77	99.6771	98.9125	1532.53	157.801	149.947	1444.9	99.7136	98.9473	5.72646
4222A_49	682.932	3.56525	3.0807	0.44019	3.92598	0.18105	0.432387	0.08932	0.00727402	1427.9	112.595	106.679	1462.74	64.7545	64.4309	1411.03	159.98	151.962	1457.46	65.1082	64.7823	-3.66448
4222A_84	551.979	2.28328	3.22154	0.304797	3.88461	0.288806	0.36182	0.0935326	0.00813684	1462.36	74.6671	72.0188	1476.66	101.072	100.287	1498.69	169.155	160.177	1470.53	100.748	99.9668	1.47021
4222A_56	140.842	1.38891	3.36198	0.640096	3.77009	0.324382	0.395891	0.0902037	0.009049	1495.58	154.751	143.789	1516.62	119.166	118.073	1429.85	197.782	185.657	1503.66	122.855	121.695	-6.06912
4222A_100	304.734	1.56515	3.84445	0.668703	3.56365	0.226631	0.500979	0.0967334	0.00769714	1602.11	145.23	135.533	1594.44	93.2798	92.6098	1562.06	153.033	145.625	1536.54	154.11	146.609	-2.07297
4222A_38	196.996	1.01605	3.97543	0.665059	3.63171	0.316868	0.431345	0.0996227	0.0091106	1629.19	140.473	131.382	1567.91	124.505	123.315	1617.05	175.278	165.602	1559.69	178.186	168.223	3.03862
4222A_106	346.772	1.37813	3.98816	0.588887	3.61961	0.237092	0.458866	0.101082	0.00857778	1631.79	123.556	116.468	1572.56	94.7142	94.0245	1644.07	161.724	153.441	1616.47	162.862	154.476	4.3491
4222A_66	31.9134	0.954419	5.15919	2.6409	3.5357	0.322672	0.14182	0.102052	0.0221709	1845.91	490.006	394.455	1605.6	132.639	131.288	1661.78	431.744	377.274	1619.43	434.629	379.577	3.38066
4222A_35	126.898	4.10094	3.93942	0.941208	3.73511	0.264866	0.400469	0.102518	0.00977911	1621.82	203.329	184.811	1529.27	99.8683	99.102	1670.21	181.79	171.377	1622.05	184.211	173.551	8.43852
4222A_46	891.019	2.81946	4.19731	0.454335	3.3045	0.203352	0.538221	0.100788	0.00713445	1673.49	90.7605	86.8771	1704.28	96.2456	95.5324	1638.66	134.389	128.622	1630.14	136.143	130.23	-4.00424
4222A_108	79.3238	0.920529	4.1018	0.989251	3.66335	0.238184	0.278602	0.102066	0.0143333	1654.66	207.095	187.916	1555.88	93.1044	92.4346	1662.02	271.905	249.256	1635.17	273.204	250.375	6.38631
4222A_54	177.718	3.7967	4.25666	0.765027	3.61667	0.41419	0.516957	0.106665	0.012839	1685.02	153.426	142.644	1573.7	162.768	160.738	1743.19	229.097	212.747	1671.91	236.828	219.453	9.7233
4222A_34	705.742	4.35514	4.48472	0.483035	3.29111	0.255323	0.424487	0.108362	0.0103026	1728.15	91.4528	87.511	1710.37	120.157	119.047	1772.06	178.827	168.694	1716.04	184.413	173.683	3.48159
4222A_104	175.557	3.19353	5.71071	0.916078	2.91062	0.173655	0.371839	0.126948	0.0106271	1932.99	143.567	134.084	1903.82	102.573	101.764	2056.13	151.588	144.15	2028.49	152.638	145.108	7.40779
4222A_62	465.178	2.72151	7.0929	1.16023	2.67765	0.114362	0.387702	0.129918	0.00972424	2123.15	151.051	140.589	2045.67	81.1348	80.6276	2096.86	134.532	128.631	2059.32	136.103	130.076	2.44108
4222A_31	585.846	3.89132	9.43801	1.25901	2.45101	0.130846	0.55222	0.167521	0.0111661	2381.53	126.322	118.922	2205.74	105.615	104.757	2533.02	114.061	109.714	2468.83	122.807	117.796	12.9205
4222A_21	202.472	1.25053	10.1388	1.66327	2.20386	0.132804	0.464836	0.170592	0.0136504	2447.52	157.577	146.225	2411.9	127.119	125.879	2563.46	137.066	130.829	2490.36	145.118	138.166	5.91225
4222A_51	238.83	2.89685	12.7967	1.44274	2.08133	0.102489	0.263189	0.185347	0.0161539	2664.8	109.057	103.498	2529.28	109.816	108.89	2701.31	147.624	140.377	2662.99	149.062	141.687	6.36846
4222A_2	139.311	1.40715	14.1231	2.96789	1.98252	0.0741926	0.284694	0.192549	0.0133818	2758.01	209.735	190.088	2632.71	90.1483	89.5222	2764.06	116.41	111.847	2727.64	118.212	113.515	4.75193
4222A_32	158.619	1.75148	13.7406	2.99375	2.08312	0.174573	0.578145	0.19484	0.0165127	2732	217.458	196.408	2527.48	180.375	177.887	2783.45	142.348	135.578	2742.94	146.04	138.934	9.19603
19091403 (422-03) random, Glenummera Formation
4223A_34	349.619	1.11886	0.558902	0.110077	14.8013	0.574216	0.0740932	0.0608578	0.0102472	450.812	72.9943	70.4614	421.449	17.1695	17.1467	634.212	384.834	343.149	420.324	17.1293	17.1079	33.5476
4223A_50	49.2172	1.36447	0.61605	0.27744	14.686	1.58873	0.0197286	0.0627209	0.0216248	487.368	182.258	167.239	424.651	44.9985	44.8406	698.783	834.8	659.812	422.577	46.8693	46.6996	39.2299
4223A_72	287.766	1.21373	0.577309	0.0888801	14.6521	0.69101	0.0739089	0.0598411	0.007978	462.73	58.0375	56.425	425.601	20.543	20.5118	597.833	302.68	276.343	424.072	20.4772	20.4463	28.8095
4223A_36	77.8293	2.12229	0.548544	0.162909	14.7442	1.17626	0.0350098	0.0586276	0.0143262	444.042	109.732	104.106	423.028	33.352	33.2659	553.294	583.21	492.858	424.643	35.6392	35.5394	23.5438
4223A_5	136.368	1.3958	0.536037	0.128265	14.4631	1.05302	0.130909	0.0568039	0.0115051	435.808	86.6094	83.0662	430.981	31.1404	31.0654	483.927	481.56	418.518	425.066	33.327	33.2411	10.941
4223A_9	220.601	0.822983	0.564904	0.100535	14.6014	0.795983	0.0835705	0.0590252	0.00804622	454.713	66.3026	64.2061	427.031	23.5283	23.484	568.026	311.435	283.67	426.521	23.5057	23.4615	24.822
4223A_21	191.798	1.39853	0.520618	0.0945317	14.5745	0.900842	0.160447	0.0585593	0.00701014	425.564	64.1249	62.1618	427.793	26.4682	26.4139	550.749	272.649	251.154	427.251	26.4386	26.3846	22.3253
4223A_89	349.617	1.11887	0.586795	0.114947	14.5486	0.564411	0.067305	0.0611978	0.0102347	468.819	74.9194	72.2534	428.532	17.3235	17.2987	646.193	381.276	340.289	428.759	17.3344	17.3111	33.6835
4223A_101	287.766	1.21373	0.603396	0.0923142	14.4434	0.68116	0.0668457	0.0600951	0.00793596	479.387	59.3178	57.6342	431.549	20.7271	20.6952	606.999	299.2	273.427	431.076	20.7113	20.6767	28.9046
4223A_31	79.7705	1.79591	0.599977	0.14572	14.2519	0.942538	0.0773198	0.0599981	0.0104314	477.219	94.6492	90.4335	437.156	28.7872	28.7231	603.505	400.306	355.471	432.836	32.0765	31.9955	27.5639
4223A_43	57.8661	1.58463	0.463328	0.183987	14.3097	1.26279	0.0648949	0.0468001	0.0149045	386.57	131.856	123.814	435.449	37.7994	37.6889	39.0375	78.0751	685.001	433.507	40.3043	40.1787	-1015.46
4223A_65	82.5059	1.2646	0.569014	0.204403	14.2567	0.71539	0.0555407	0.0566749	0.0180439	457.377	136.784	128.149	437.015	22.2214	22.1847	478.904	793.662	635.652	433.653	23.7647	23.7195	8.74691
4223A_71	77.1346	1.27466	0.494327	0.217413	14.2775	1.03975	0.0194362	0.0547435	0.0216262	407.855	153.379	142.604	436.397	31.4598	31.3832	401.761	803.522	780.977	434.89	31.3606	31.283	-8.62109
4223A_81	220.594	0.822951	0.594703	0.105006	14.3389	0.781648	0.0768431	0.0594428	0.00801525	473.866	67.9852	65.7828	434.592	23.8289	23.7835	583.351	307.071	280.021	435.285	23.8652	23.8197	25.5008
4223A_108	75.5897	1.39264	0.62327	0.171778	14.3425	0.943231	0.0245566	0.0715516	0.0161925	491.895	110.397	104.704	434.486	28.3988	28.3364	973.214	499.373	430.135	435.385	28.4006	28.3382	55.3556
4223A_18	167.695	1.36414	0.4815	0.107052	14.2812	0.789838	0.14509	0.0528185	0.00925318	399.101	74.7291	72.0765	436.289	24.3291	24.2834	321.006	424.615	375.307	436.671	25.1163	25.0675	-35.913
4223A_53	147.09	1.71903	0.624883	0.194457	14.1499	1.12947	0.0316298	0.0592591	0.0159566	492.904	125.303	118.019	440.203	34.6635	34.5706	576.63	646.313	537.016	437.662	35.4131	35.3146	23.6593
4223A_46	119.837	1.61527	0.569311	0.133625	14.1377	0.706734	0.0616806	0.0613745	0.0120485	457.569	88.353	84.6687	440.569	22.3414	22.3028	652.384	451.973	395.471	439.149	22.6988	22.6589	32.4678
4223A_78	195.243	1.40745	0.550084	0.119661	14.1754	0.858098	0.0496273	0.0572479	0.0106539	445.052	79.9365	76.9088	439.437	26.5858	26.5296	501.095	438.333	385.438	439.481	27.1841	27.1283	12.3047
4223A_62	97.5069	2.16323	0.607637	0.25463	14.1665	0.806826	0.0225697	0.0529918	0.0197821	482.069	167.55	154.773	439.704	25.1261	25.0772	328.447	656.894	751.651	440.054	25.1434	25.0944	-33.8735
4223A_1	266.274	2.8348	0.607171	0.13554	13.9624	0.990693	0.202248	0.0598262	0.00990882	481.774	87.49	83.8758	445.913	31.4119	31.337	597.296	380.583	339.849	440.076	31.0346	30.9586	25.3448
4223A_88	131.135	1.3824	0.529361	0.100545	13.782	0.612819	0.0515189	0.0485821	0.00755849	431.385	67.8766	65.6812	451.552	20.5279	20.4952	127.713	255.427	347.02	440.215	27.5823	27.5235	-253.566
4223A_85	180.03	1.2123	0.651859	0.142732	14.116	0.876982	0.0527471	0.067454	0.0121133	509.622	89.6877	85.8938	441.225	27.322	27.2642	851.824	397.279	352.483	441.303	27.3289	27.2696	48.2023
4223A_95	206.546	1.14657	0.517567	0.119976	14.0839	0.479036	0.0702135	0.0531758	0.00945306	423.525	81.904	78.7283	442.196	15.9648	15.9436	336.304	430.082	379.526	442.355	20.1534	20.1218	-31.4869
4223A_73	112.811	1.37941	0.771937	0.192017	14.1443	0.965122	0.0591803	0.0684607	0.0143703	580.874	113.126	107.155	440.371	29.8288	29.7586	882.534	467.224	406.359	443.427	30.3267	30.2569	50.1015
4223A_44	104.379	1.4032	0.684513	0.186825	14.167	0.822204	0.0364762	0.0723058	0.0148497	529.499	115.856	109.602	439.689	25.5893	25.5372	994.56	448.164	391.545	443.733	28.7449	28.6809	55.7906
4223A_15	52.7316	1.58562	0.707575	0.284364	14.0196	0.914441	0.0274664	0.0649084	0.0199447	543.305	176.55	162.421	444.156	28.8637	28.7979	771.37	723.495	587.867	444.096	32.59	32.5093	42.4198
4223A_26	50.5249	1.66103	0.564076	0.176199	14.0268	1.26425	0.0498429	0.0540014	0.0155681	454.176	117.734	111.281	443.934	39.3267	39.2057	371.107	724.269	591.165	444.165	43.9842	43.8346	-19.6244
4223A_69	111.698	1.42696	0.626207	0.155486	13.9896	0.977276	0.0738867	0.0565372	0.0115536	493.731	99.4809	94.8343	445.076	30.8207	30.7472	473.526	487.124	422.751	444.663	33.6212	33.5323	6.0081
4223A_12	129.48	1.41292	0.561586	0.148602	13.7449	0.83081	0.127052	0.0581294	0.0126396	452.558	98.9991	94.3965	452.729	27.3866	27.3286	534.643	515.254	443.527	446.646	30.093	30.0229	15.3211
4223A_98	509.737	2.28546	0.582422	0.0807449	13.9156	0.382419	0.0622676	0.0582792	0.00628297	466.017	52.4834	51.1611	447.363	13.6379	13.6235	540.275	244.924	227.45	446.738	13.6291	13.6134	17.1972
4223A_63	69.1732	1.05747	0.713858	0.247481	13.7597	0.872216	0.0895626	0.0680997	0.0158272	547.035	152.184	141.57	452.257	28.5431	28.4786	871.589	522.635	447.661	449.85	30.1369	30.0667	48.1113
4223A_6	117.755	1.20086	0.457471	0.124383	13.6483	1.02799	0.121745	0.0499244	0.0112224	382.498	88.5578	84.8569	455.821	33.955	33.8657	191.475	382.949	484.75	451.404	35.8333	35.7339	-138.058
4223A_66	75.5181	1.22792	0.623466	0.149162	13.6035	0.879992	0.038	0.0634999	0.011896	492.017	95.5033	91.2128	457.271	29.4063	29.3393	725.015	424.541	374.115	454.221	34.3325	34.2399	36.9295
4223A_105	216.21	1.20046	0.605975	0.106182	13.6589	0.962991	0.0740256	0.057487	0.00843899	481.018	68.2684	66.0479	455.479	31.7744	31.6963	510.264	340.113	307.375	454.382	31.7052	31.6259	10.7366
4223A_27	43.7776	1.46746	0.536328	0.260328	13.6718	1.04329	0.0420982	0.0583778	0.022124	436.001	179.784	165.154	455.065	34.2964	34.2054	543.97	957.547	735.726	455.691	35.3471	35.2489	16.3437
4223A_23	130.306	1.34951	0.605452	0.150853	13.5373	0.880452	0.0715534	0.0588876	0.0121142	480.688	97.7224	93.235	459.429	29.7435	29.6751	562.943	482.84	419.206	459.715	29.7609	29.6923	18.3881
4223A_20	383.458	2.3263	0.573823	0.0955976	13.5396	0.549994	0.0853578	0.0555871	0.0071504	460.484	62.6327	60.7586	459.354	19.4079	19.3787	435.915	299.962	274.319	460.026	19.6739	19.6439	-5.37711
4223A_77	84.7927	1.39686	0.744122	0.230561	13.8091	0.971634	0.0474415	0.0825666	0.019657	564.808	138.868	129.977	450.695	31.4044	31.3281	1258.99	504.65	433.06	462.188	34.9427	34.8469	64.2018
4223A_17	209.22	1.49895	0.611342	0.131627	13.4464	1.05637	0.247458	0.0601321	0.0114828	484.406	84.6861	81.2956	462.426	35.8437	35.7429	608.33	442.139	388.054	463.393	36.5555	36.4522	23.9842
4223A_104	108.718	1.48172	0.598353	0.147364	13.4318	0.890991	0.0545599	0.0599798	0.0120609	476.188	95.8423	91.5221	462.911	30.4472	30.3755	602.846	467.821	407.71	463.791	31.0452	30.9706	23.2124
4223A_99	63.5814	1.1102	0.58591	0.223755	13.1779	1.43828	0.0301365	0.0590405	0.0184155	468.252	148.564	138.433	471.51	50.2052	50.0118	568.591	762.781	615.026	469.649	50.0202	49.8269	17.0741
4223A_25	47.0677	1.41875	0.855446	0.4376	12.835	0.894042	0.0221696	0.0797269	0.0314254	627.634	254.813	226.375	483.647	33.3396	33.2522	1190.24	896.282	693.05	478.8	34.9027	34.8085	59.3656
4223A_100	85.9636	1.27245	0.75338	0.183417	12.1826	0.990319	0.0286428	0.0606621	0.0122761	570.184	109.095	103.532	508.553	40.5139	40.387	627.276	469.032	408.55	511.894	41.6949	41.5605	18.9267
4223A_30	202.575	3.49839	0.799616	0.139856	12.0238	0.744271	0.123538	0.0675915	0.0100436	596.612	80.484	77.4155	515.008	31.6953	31.6176	856.053	324.831	294.255	513.215	37.3013	37.1923	39.8393
4223A_60	174.434	4.19159	1.22143	0.16751	7.93645	0.468296	0.201084	0.0708515	0.00795229	810.43	78.047	75.1578	765.011	44.1295	43.9775	953.132	238.476	221.487	763.91	44.8576	44.7021	19.7372
4223A_3	431.912	6.60996	1.43565	0.225612	6.78099	0.354026	0.287079	0.0740227	0.00898207	903.906	96.3022	91.9413	886.772	45.4448	45.2838	1042.09	255.064	235.633	881.854	47.4746	47.2991	14.9041
4223A_67	98.4688	2.27354	2.10758	0.414262	6.58319	0.338756	0.0888645	0.0841462	0.0121644	1151.29	140.08	131.038	911.617	45.8106	45.6485	1295.93	294.866	268.867	909.649	48.4261	48.2448	29.6557
4223A_7	190.95	2.4597	1.39181	0.230011	6.43526	0.349103	0.240615	0.0710248	0.00715687	885.464	100.071	95.3706	931.128	49.2234	49.0375	958.127	213.079	199.409	932.724	49.302	49.1142	2.81782
4223A_52	76.1341	4.8039	1.60601	0.321839	6.36466	0.319924	0.14778	0.0745252	0.00875626	972.556	129.437	121.679	940.739	46.1863	46.0214	1055.72	246.127	227.973	934.289	52.8381	52.621	10.8917
4223A_109	121.044	1.65987	1.95881	0.324096	6.34582	0.319084	0.0624016	0.0824047	0.010445	1101.48	114.382	108.282	943.336	46.2343	46.0704	1255.15	258.5	238.343	942.706	54.261	54.0336	24.8429
4223A_32	208.46	2.91883	1.57475	0.235867	6.22782	0.312206	0.260259	0.0722085	0.00665402	960.302	95.2143	90.9494	959.943	47.0588	46.8877	991.822	193.26	181.927	959.041	47.0387	46.8665	3.21415
4223A_91	205.132	2.92169	1.63619	0.243832	6.12635	0.307121	0.251808	0.0728627	0.00662841	984.244	96.1582	91.8099	974.698	47.6207	47.4441	1010.14	190.168	179.174	968.692	47.3678	47.1945	3.50828
4223A_8	217.737	1.8291	1.66351	0.241193	6.14402	0.297758	0.223687	0.0717179	0.00664868	994.716	94.0942	89.9267	972.096	46.2457	46.0803	977.945	194.884	183.375	970.148	46.1708	46.0073	0.598132
4223A_39	144.295	2.92208	1.68465	0.35967	6.10946	0.236771	0.0762352	0.0739073	0.0106978	1002.74	140.804	131.671	977.198	38.0942	37.9806	1038.94	306.91	279.205	979.316	38.1598	38.0484	5.9425
4223A_93	72.7067	1.32181	1.5073	0.391	6.07623	0.375538	0.043257	0.0720915	0.0141352	933.345	164.858	152.474	982.154	58.147	57.8872	988.525	426.83	375.182	982.108	58.1501	57.889	0.644445
4223A_29	511.626	1.76381	1.67249	0.199212	6.05081	0.198698	0.118923	0.0733001	0.00591801	998.133	77.1346	74.3118	985.981	33.5519	33.4648	1022.26	167.869	159.239	984.332	33.5128	33.4247	3.54922
4223A_37	336.4	2.37366	1.65491	0.21332	6.05945	0.229644	0.0929542	0.0737285	0.00745806	991.431	83.2696	79.9893	984.678	37.6807	37.5697	1034.04	211.416	197.897	985.656	37.7081	37.5982	4.77407
4223A_2	977.226	0.734634	1.63675	0.166786	6.06164	0.300625	0.40734	0.0745761	0.0050672	984.461	65.2652	63.2328	984.347	47.846	47.6677	1057.1	139.916	133.857	985.913	47.9177	47.7403	6.88236
4223A_55	353.54	2.13418	1.76203	0.211664	5.95592	0.23815	0.228045	0.0777479	0.00600841	1031.59	79.3424	76.3588	1000.53	39.9362	39.8117	1140.44	157.642	149.958	996.157	39.7943	39.6733	12.2679
4223A_56	144.292	2.16757	1.83753	0.441139	5.93146	0.306166	0.16787	0.0739301	0.0135007	1058.98	164.331	152.023	1004.35	50.297	50.1015	1039.56	392.419	348.224	998.547	50.8802	50.6802	3.38701
4223A_64	91.812	1.722	1.974	0.498914	5.83718	0.26197	0.0874915	0.0780335	0.0120404	1106.67	177.91	163.571	1019.36	44.9079	44.7519	1147.73	322.82	292.14	1013.96	44.7095	44.5564	11.1847
4223A_61	278.236	4.1963	2.0012	0.354913	5.72622	0.164367	0.118162	0.0819941	0.00844686	1115.92	123.773	116.66	1037.6	31.4541	31.3788	1245.38	208.709	195.378	1038.15	31.4618	31.3854	16.6837
4223A_13	91.3469	2.50804	2.0547	0.423391	5.66103	0.32407	0.130365	0.0802245	0.0130305	1133.86	145.85	136.073	1048.63	57.7145	57.4559	1202.51	337.99	304.416	1054.66	58.911	58.6429	12.7969
4223A_51	62.7974	1.48589	1.85814	0.587068	5.57501	0.302499	0.0478647	0.0686598	0.0110633	1066.33	220.066	198.533	1063.54	55.5128	55.2733	888.538	351.971	316.287	1056.28	56.3395	56.0955	-19.6959
4223A_110	273.177	2.63573	2.07013	0.317535	5.49108	0.184918	0.153794	0.0774731	0.00758168	1138.98	107.831	102.392	1078.51	37.1693	37.0626	1133.39	201.232	188.882	1076.13	37.1061	36.9998	4.84236
4223A_103	536.437	3.53299	2.06698	0.256438	5.47725	0.172541	0.259749	0.0792407	0.00563509	1137.93	86.7243	83.1718	1081.02	35.0254	34.9304	1178.15	143.953	137.506	1081.09	35.0301	34.9352	8.24484
4223A_84	82.4474	2.6274	2.23737	0.386989	5.43867	0.235647	0.177011	0.0825726	0.00716761	1192.83	125.156	117.888	1088.07	46.1141	45.9483	1259.13	174.556	165.125	1089.62	46.1721	46.0072	13.5854
4223A_102	273.177	2.63569	2.16318	0.32974	5.41292	0.182286	0.143321	0.0777918	0.00747967	1169.29	108.705	103.18	1092.84	37.3249	37.2183	1141.56	197.354	185.456	1092.98	37.3331	37.2241	4.26837
4223A_92	88.5044	2.75654	2.07655	0.466405	5.2183	0.216339	0.0597023	0.0750091	0.00997746	1141.1	160.079	148.377	1130.22	45.9269	45.764	1068.75	279.589	256.378	1122.41	47.6131	47.4392	-5.7516
4223A_28	209.647	3.51254	2.35886	0.390647	5.17596	0.187008	0.182419	0.083452	0.00781662	1230.24	121.666	114.787	1138.69	41.3934	41.2594	1279.81	188.223	177.292	1138.08	42.072	41.935	11.0263
4223A_96	127.005	2.41056	2.30963	0.424312	5.14288	0.191168	0.125612	0.0814155	0.00896157	1215.25	134.537	126.175	1145.4	42.3067	42.1671	1231.49	223.989	208.715	1144.87	44.5996	44.4444	6.99078
4223A_47	116.94	2.358	2.64176	0.613673	4.83294	0.159983	0.0701361	0.0841946	0.0106065	1312.35	178.743	164.275	1212.35	40.6335	40.5059	1297.05	255.285	235.565	1213.48	40.6687	40.5419	6.53019
4223A_74	80.67	2.54079	2.79209	0.541011	4.7975	0.272056	0.245959	0.0984252	0.014111	1353.42	150.29	139.929	1220.51	65.5811	65.2491	1594.5	280.362	256.418	1217.3	65.4386	65.1082	23.4549
4223A_57	142.288	1.07682	3.00503	0.564414	4.5724	0.178179	0.0847904	0.0997967	0.0131943	1408.9	148.385	138.278	1275.02	48.7428	48.559	1620.3	256.702	236.46	1268.8	48.5566	48.3746	21.3094
4223A_90	168.806	2.06739	3.07614	0.627669	4.59893	0.206233	0.0788507	0.0884174	0.0116632	1426.77	162.702	150.628	1268.34	54.7354	54.5041	1391.57	264.251	243.081	1269.14	54.7718	54.5399	8.85525
4223A_86	156.823	2.75095	3.08124	0.488895	4.57313	0.193026	0.127459	0.0933786	0.009873	1428.04	125.428	118.13	1274.84	52.1018	51.8921	1495.58	206.944	193.666	1273.64	52.0697	51.8602	14.7595
4223A_54	130.166	2.04229	2.96979	0.503847	4.531	0.19619	0.275901	0.0929156	0.00735528	1399.92	133.144	124.949	1285.58	53.8391	53.6153	1486.17	153.791	146.339	1274.57	57.4818	57.2256	13.4969
4223A_94	231.181	1.88021	2.8715	0.442806	4.58405	0.247731	0.237432	0.0903212	0.00752065	1374.47	119.588	112.936	1272.08	65.0712	64.7431	1432.33	163.186	154.843	1286.77	69.1543	68.7851	11.188
4223A_45	76.5981	1.37591	2.39521	0.534204	4.5058	0.200194	0.126766	0.0927488	0.0104186	1241.17	166.395	153.788	1292.1	55.3547	55.1194	1482.76	220.733	205.699	1288.44	56.1432	55.9	12.8588
4223A_80	157.918	3.95356	2.85655	0.525498	4.49199	0.177345	0.187961	0.0855682	0.00722053	1370.54	143.296	133.848	1295.69	49.972	49.7801	1328.45	167.87	159.099	1296.54	50.8563	50.6563	2.46536
4223A_75	285.379	3.30285	2.82401	0.434667	4.43519	0.134023	0.11915	0.0868237	0.00771335	1361.93	118.826	112.256	1310.71	40.5068	40.3798	1356.58	176.289	166.628	1303.69	41.032	40.902	3.38158
4223A_40	106.152	1.41539	2.65016	0.557968	4.41466	0.21122	0.105785	0.0877717	0.0116435	1314.69	161.465	149.567	1316.22	60.2264	59.9464	1377.49	266.343	244.864	1313.58	60.1189	59.8386	4.44787
4223A_10	96.4105	1.89661	3.18629	0.6005	4.35457	0.193467	0.0977939	0.0984414	0.0137843	1453.84	151.138	140.665	1332.63	57.1022	56.8504	1594.81	273.509	250.673	1332.89	57.1225	56.8706	16.4394
4223A_79	242.335	1.49999	3.10974	0.487045	4.29003	0.146953	0.116329	0.0908083	0.00777915	1435.1	124.046	116.903	1350.72	46.0384	45.8747	1442.59	167.784	158.972	1349.68	46.0197	45.8558	6.36829
4223A_11	242.331	1.49995	3.1247	0.489531	4.27816	0.146549	0.11726	0.0903038	0.00770043	1438.79	124.232	117.068	1354.1	46.0067	45.842	1431.96	167.238	158.486	1354.62	46.0267	45.8632	5.43757
4223A_87	97.6758	3.43283	3.75349	0.774756	3.81272	0.198635	0.152646	0.101614	0.00821959	1582.86	172.628	159.096	1501.5	72.9842	72.5734	1653.8	153.767	146.257	1525.19	162.777	154.437	9.20944
4223A_48	109.501	1.5613	3.72001	0.746647	3.65253	0.123644	0.227514	0.101779	0.010153	1575.68	167.329	154.585	1559.98	51.9145	51.7051	1656.82	190.714	179.292	1639.37	191.375	179.886	5.84495
4223A_35	7.94079	2.10721	4.93082	2.53321	3.20288	0.36914	0.0526569	0.108473	0.0334597	1807.55	487.877	393.076	1751.62	179.683	177.213	1773.93	623.707	515.477	1759.11	625.011	516.431	1.258
4223A_49	83.0626	2.36027	5.02133	1.15486	3.35413	0.162449	0.174779	0.114425	0.010154	1822.93	204.726	185.964	1682.08	75.6659	75.2243	1870.85	164.539	155.883	1854.26	165.112	156.404	10.09
4223A_4	139.168	4.00307	5.41937	0.718409	3.05916	0.178326	0.152939	0.115795	0.00927013	1887.92	116.937	110.569	1823.28	96.1509	95.4391	1892.29	147.644	140.63	1867.61	148.436	141.356	3.64691
4223A_42	139.166	4.00464	5.29836	0.703897	3.0776	0.1794	0.150663	0.115925	0.00940035	1868.6	116.772	110.421	1813.76	95.922	95.2134	1894.31	149.562	142.368	1876.72	150.164	142.919	4.25257
4223A_58	67.5463	2.94992	5.27553	1.33865	3.19856	0.138494	0.205038	0.134048	0.0126985	1864.91	229.038	205.805	1753.69	70.9512	70.564	2151.67	170.263	160.898	2124.8	226.695	210.407	18.4963
4223A_14	225.108	4.35534	9.92066	1.46507	2.33537	0.0694882	0.186882	0.164538	0.0095482	2427.43	141.003	131.846	2297.59	65.8718	65.5371	2502.84	99.3455	96.0357	2451.06	106.711	102.909	8.20068
4223A_97	72.7621	1.26833	10.7085	2.21258	2.2376	0.0798659	0.0864827	0.164214	0.0151627	2498.16	201.559	183.348	2381.49	77.6924	77.2278	2499.52	159.776	151.385	2477.69	160.392	151.945	4.72206
4223A_82	226.643	4.42051	10.441	1.52418	2.29319	0.0682334	0.167951	0.165653	0.00902572	2474.69	139.986	130.956	2333.04	65.9132	65.5777	2514.2	93.0725	90.1596	2491.31	93.748	90.7961	7.20517
4223A_107	117.181	2.05446	11.401	1.95503	2.25433	0.106439	0.212936	0.166275	0.0116152	2556.51	166.738	154.08	2366.69	98.8319	98.0803	2520.49	119.803	115.019	2493.16	123.541	118.466	6.10198
4223A_24	117.183	2.05492	10.918	1.88015	2.28726	0.107992	0.216731	0.165683	0.0119408	2516.17	166.855	154.18	2338.11	98.2566	97.5135	2514.5	123.758	118.661	2504.16	126.958	121.602	7.01487
4223A_16	379.76	3.28274	12.4112	1.40018	2.24463	0.0705873	0.32099	0.184051	0.00988192	2636.02	108.877	103.335	2375.25	69.9602	69.5839	2689.71	90.1388	87.3859	2647.63	98.1326	94.8834	11.6912
4223A_76	378.785	3.28135	12.3475	1.39256	2.25065	0.0707765	0.317969	0.185062	0.0100667	2631.19	108.799	103.265	2369.93	70.0729	69.6949	2698.76	91.263	88.4414	2667.28	100.532	97.123	12.1845
4223A_38	95.2765	5.51167	10.8918	1.93905	2.15395	0.0810517	0.192951	0.185046	0.0135967	2513.93	172.706	159.163	2458.36	83.9552	83.4117	2698.62	123.98	118.83	2694.74	124.099	118.939	8.90321
4223A_41	58.8709	1.98316	15.0314	3.8195	2.08602	0.10536	0.1901	0.186728	0.0147531	2817.23	257.582	228.557	2524.57	111.132	110.182	2713.56	133.344	127.401	2697.81	133.802	127.822	6.96459
4223A_22	95.2796	5.5091	11.3217	2.00995	2.12253	0.0798686	0.185066	0.18671	0.0134495	2549.99	172.779	159.224	2488.54	84.4933	83.942	2713.39	121.323	116.383	2698.97	121.722	116.753	8.28675
4223A_33	28.739	2.72001	14.193	5.96885	2.15103	0.0919121	0.146899	0.18869	0.0189784	2762.69	444.121	364.209	2461.13	93.7118	93.0359	2730.78	170.579	160.966	2725.98	170.724	161.096	9.87427
4223A_83	193.563	1.23486	12.8396	2.03243	2.03093	0.0575072	0.423822	0.198878	0.00946447	2667.96	154.873	143.894	2580.99	68.926	68.5604	2817.01	78.8149	76.6918	2765.07	86.1192	83.5957	8.37843
4223A_70	61.7445	1.70164	12.0019	2.91785	2.14025	0.139943	0.289644	0.195546	0.0163878	2604.56	241.698	215.967	2471.42	138.805	137.327	2789.38	140.644	134.03	2772.17	141.112	134.459	11.3989
4223A_68	192.818	1.23616	12.2039	1.95063	2.0683	0.0585638	0.416853	0.197591	0.0101915	2620.21	155.833	144.722	2542.44	68.9737	68.6068	2806.4	85.6043	83.1068	2783.74	89.1359	86.4339	9.40548
4223A_19	76.628	2.48206	12.1105	1.88691	2.04776	0.0831864	0.264127	0.197755	0.0150736	2613	151.662	141.119	2563.49	92.8901	92.2242	2807.76	127.416	121.96	2792.55	127.888	122.395	8.69982
4223A_106	190.432	1.82544	15.0864	2.00173	2.00461	0.0983945	0.441356	0.216617	0.0131529	2820.71	130.452	122.575	2608.85	110.971	110.025	2955.72	99.7091	96.3192	2915.13	105.353	101.581	11.7353
4223A_59	116.884	2.09369	20.2911	3.26861	1.81864	0.0608873	0.190297	0.274137	0.0169514	3105.33	162.19	150.189	2824.59	85.0206	84.4637	3329.85	98.5045	95.1527	3253.81	153.506	145.536	15.1736
19091404 (422-04) random, Mweelrea Formation
4224A_8	443.11	1.5887	0.567838	0.0730397	14.7489	0.741151	0.307785	0.0592109	0.00568503	456.615	47.8626	46.7604	422.899	21.5061	21.4702	574.861	215.903	202.181	422.268	21.4808	21.4464	26.4346
4224A_64	443.117	1.58871	0.568822	0.0732352	14.7337	0.74038	0.31122	0.058833	0.00563626	457.253	47.9619	46.8549	423.321	21.5306	21.4933	560.92	215.928	202.215	423.367	21.5347	21.4989	24.5309
4224A_65	585.483	1.57391	0.556253	0.0855537	14.5055	0.662144	0.123505	0.0554703	0.00697861	449.085	56.6013	55.0664	429.762	20.0041	19.9746	431.227	293.31	268.752	429.155	19.9829	19.952	0.339798
4224A_31	585.476	1.57389	0.547172	0.0840511	14.475	0.660746	0.122225	0.0549324	0.00690503	443.143	55.9244	54.4253	430.639	20.023	19.9905	409.473	294.193	269.527	429.816	19.9881	19.9586	-5.16911
4224A_21	141.556	0.8041	0.62165	0.105536	14.4616	1.07212	0.0548876	0.0628739	0.00912724	490.881	67.1796	65.0281	431.023	31.5682	31.4911	703.968	325.057	294.694	431.13	31.5807	31.502	38.7723
4224A_26	451.802	1.93045	0.548529	0.0879001	14.2947	0.463173	0.118673	0.0555027	0.00815257	444.033	58.4706	56.8341	435.891	15.0543	15.0381	432.531	345.081	311.577	434.697	15.0326	15.0136	-0.77687
4224A_16	300.153	2.59702	0.612404	0.0933656	14.2505	0.842543	0.16662	0.0593304	0.00700599	485.075	59.6633	57.9603	437.197	25.8136	25.762	579.24	267.461	246.711	435.563	25.7309	25.6797	24.5223
4224A_74	451.799	1.9304	0.548794	0.0879585	14.2879	0.462959	0.122388	0.0550835	0.00808467	444.206	58.4999	56.8617	436.091	15.0839	15.0663	415.615	345.849	312.237	435.604	15.0736	15.0574	-4.92658
4224A_82	300.154	2.59701	0.613076	0.0935326	14.2432	0.842104	0.169766	0.0589174	0.00694765	485.498	59.7463	58.0386	437.415	25.8343	25.7826	564.046	267.781	247.001	436.781	25.8023	25.7508	22.4505
4224A_62	192.646	1.72085	0.574258	0.135749	14.2149	0.772429	0.105929	0.0555074	0.010569	460.765	89.5009	85.7224	438.255	23.9146	23.8718	432.72	454.791	398.321	437.472	24.2125	24.1671	-1.27905
4224A_6	174.779	0.926284	0.588423	0.112508	14.1681	0.926784	0.0908499	0.0609652	0.00967171	469.86	73.2239	70.6752	439.656	28.5674	28.5043	638.007	361.036	324.094	438.193	31.1372	31.0622	31.0891
4224A_90	192.645	1.72084	0.568804	0.134355	14.1753	0.770261	0.107614	0.0548483	0.0104329	457.241	88.8756	85.1487	439.439	23.9418	23.8975	406.043	456.512	399.727	438.477	24.2317	24.1877	-8.22456
4224A_7	140.619	1.07875	0.495011	0.0963561	14.2716	0.863576	0.182845	0.0552325	0.00728065	408.319	66.521	64.4109	436.572	26.3256	26.2705	421.645	308.541	281.5	438.635	27.992	27.9313	-3.54028
4224A_58	140.62	1.07875	0.501796	0.0977877	14.3061	0.865642	0.183845	0.055698	0.00734685	412.918	67.2158	65.062	435.555	26.2837	26.2302	440.352	307.719	280.786	438.67	28.0077	27.947	1.08922
4224A_28	489.301	1.55018	0.471925	0.0571507	14.253	0.601672	0.0929513	0.051111	0.0051772	392.517	39.8121	39.0468	437.125	18.9457	18.9178	245.84	242.043	225.267	438.996	19.3169	19.288	-77.8086
4224A_37	489.299	1.55015	0.472083	0.0571692	14.2454	0.60136	0.0973853	0.0507211	0.00512965	392.627	39.8209	39.055	437.349	18.9723	18.9459	228.176	242.443	225.632	439.81	19.3633	19.3343	-91.6714
4224A_25	330.503	1.87587	0.569794	0.0817942	13.9592	0.721495	0.0601016	0.0534081	0.00618995	457.881	53.608	52.2292	446.012	23.2076	23.1674	346.174	273.378	252.034	440.823	24.0949	24.0514	-28.8403
4224A_30	422.409	2.71821	0.565605	0.0782403	14.082	0.615637	0.18751	0.0553927	0.00530762	455.168	51.388	50.1195	442.255	19.8029	19.7712	428.109	221.057	206.82	440.989	20.1131	20.0831	-3.30437
4224A_108	529.243	1.72063	0.547171	0.0925196	14.0703	0.722533	0.255559	0.0576783	0.00650413	443.142	61.6455	59.829	442.609	22.8749	22.8358	517.565	257.67	238.427	442.136	23.847	23.803	14.4823
4224A_85	431.533	2.70986	0.561429	0.0776853	14.038	0.613719	0.193802	0.0547526	0.00522474	452.456	51.157	49.9	443.594	19.8305	19.8014	402.136	221.14	206.915	443.062	20.0864	20.0567	-10.3095
4224A_40	1349.89	1.93956	0.572441	0.0528134	13.9365	0.356369	0.168103	0.057449	0.00443978	459.592	34.3932	33.8205	446.714	12.8124	12.7997	508.812	174.602	165.555	446.3	12.9295	12.918	12.2047
4224A_3	612.969	1.73319	0.542864	0.0662873	13.9449	0.660324	0.17156	0.0572335	0.00601799	440.311	44.0999	43.1629	446.453	21.4821	21.4464	500.541	240.313	223.508	447.013	21.9542	21.917	10.8059
4224A_55	443.434	1.78306	0.539744	0.0720075	13.8915	0.644079	0.196585	0.0517265	0.00515823	438.256	48.0492	46.9386	448.112	21.1305	21.0959	273.34	236.94	220.813	448.059	21.5026	21.4654	-63.9394
4224A_47	260.007	0.936599	0.496366	0.110487	13.6925	0.487461	0.0792276	0.05016	0.00851681	409.24	76.3915	73.6216	454.401	16.9858	16.962	202.415	404.83	371.981	453.528	17.2779	17.2548	-124.49
4224A_103	126.544	2.15313	0.535415	0.117529	13.528	0.887395	0.0957758	0.0533698	0.00832528	435.397	79.2491	76.2724	459.735	29.864	29.7965	344.553	373.674	334.901	459.575	33.9351	33.8475	-33.4295
4224A_39	200.835	1.40052	0.698701	0.146497	11.7891	0.541573	0.113747	0.0552535	0.00866245	538.015	89.5109	85.7317	524.852	24.3645	24.3172	422.494	370.364	332.065	523.314	25.6327	25.5803	-24.2273
4224A_49	644.218	6.1197	1.29076	0.145743	7.48488	0.20402	0.181346	0.0684435	0.00482084	841.636	65.6507	63.5947	808.385	23.758	23.7156	882.012	149.179	142.376	807.396	23.7494	23.7057	8.34766
4224A_32	152.855	3.16792	1.73088	0.363838	6.75326	0.289259	0.0571818	0.0747866	0.0095004	1020.08	139.997	130.965	890.172	37.7682	37.6578	1062.77	266.703	245.508	886.314	37.6484	37.5374	16.2405
4224A_22	669.973	5.07035	1.6642	0.225472	6.3317	0.408125	0.362093	0.0762483	0.00810512	994.976	87.8036	84.164	945.293	58.3479	58.0863	1101.6	220.268	205.579	944.315	58.306	58.0436	14.1888
4224A_13	46.1223	1.50803	1.72603	0.43265	6.31794	0.414805	0.104236	0.0767341	0.0121666	1018.27	167.906	155.077	947.208	59.4596	59.1852	1114.29	333.921	301.256	946.805	59.2086	58.9367	14.9943
4224A_57	189.225	3.69626	1.74966	0.254443	6.1813	0.306757	0.157806	0.0673755	0.00629525	1027.04	96.2027	91.8505	966.652	46.6526	46.4844	849.402	200.519	188.44	963.18	47.7273	47.5512	-13.8038
4224A_12	420.34	3.47836	1.59646	0.160766	6.1717	0.212695	0.184125	0.072344	0.00549683	968.825	63.8637	61.9165	968.047	33.908	33.8205	995.635	158.378	150.684	964.591	33.8294	33.7435	2.77081
4224A_78	577.216	3.11018	1.70397	0.194753	6.09733	0.217474	0.205358	0.0737898	0.00525083	1010.02	74.4825	71.8467	979.002	35.2286	35.1313	1035.72	147.171	140.49	977.724	35.2078	35.1106	5.47655
4224A_105	61.8468	1.38845	1.75555	0.431353	6.03504	0.355948	0.0555517	0.0700588	0.014961	1029.21	165.513	153.034	988.369	55.8209	55.5804	930.077	472.291	410.034	984.096	55.6116	55.3715	-6.26753
4224A_46	82.2816	1.09444	2.00479	0.562665	6.02202	0.258382	0.0671709	0.0695319	0.0119325	1117.13	199.635	181.755	990.351	41.8282	41.6929	914.561	374.702	334.465	989.632	41.8104	41.6752	-8.28699
4224A_43	177.83	3.63493	1.62018	0.302832	5.95397	0.221147	0.127368	0.0708304	0.00871347	978.062	120.882	114.089	1000.84	37.2036	37.0952	952.523	262.393	241.971	992.474	37.6748	37.5637	-5.07203
4224A_100	177.827	3.6345	1.59968	0.298169	5.93942	0.220605	0.129677	0.0698474	0.00857154	970.084	119.932	113.242	1003.11	37.1971	37.0913	923.869	262.919	242.449	995.375	37.683	37.5731	-8.57656
4224A_70	72.3062	2.87988	1.63287	0.504989	5.96908	0.57769	0.167579	0.0694729	0.01367	982.968	204.734	185.971	998.487	90.9017	90.2652	912.815	433.707	380.69	999.771	91.8644	91.2158	-9.38547
4224A_67	53.5231	2.06174	1.98802	0.540175	5.94872	0.419326	0.169997	0.0759381	0.0117685	1111.45	192.393	175.733	1001.65	67.0185	66.6719	1093.44	327.015	295.657	1000.16	66.9349	66.5891	8.39433
4224A_48	74.6523	2.2187	1.7117	0.541681	5.94672	0.405509	0.0462076	0.0746765	0.0194579	1012.92	213.689	193.328	1001.97	64.9721	64.6449	1059.81	574.34	484.214	1001.31	64.939	64.6137	5.4577
4224A_84	74.7264	6.82355	2.79516	0.692431	6.02358	0.342302	0.175308	0.104963	0.0135541	1354.24	194.26	177.289	990.114	54.0479	53.8209	1713.66	247.425	228.486	1001.4	69.6322	69.257	42.2225
4224A_44	59.694	1.27868	1.4031	0.314919	5.89229	0.368696	0.218509	0.0643153	0.00701318	890.248	137.622	128.885	1010.53	60.3422	60.0625	752.017	239.083	222.2	1003.29	62.3148	62.0138	-34.3763
4224A_73	78.1618	1.79608	2.04874	0.457196	5.85212	0.322818	0.247732	0.0877138	0.00954822	1131.88	158.28	146.831	1016.95	53.8757	53.654	1376.22	216.852	202.401	1003.75	58.2044	57.9442	26.1059
4224A_69	170.836	2.25493	1.625	0.383447	5.91327	0.526991	0.216336	0.0713507	0.01281	979.928	154.018	143.155	1007.21	84.5521	84.0013	967.477	389.8	346.321	1006.78	85.5306	84.9668	-4.10701
4224A_42	431.703	3.56876	1.8976	0.245457	5.87382	0.172393	0.16158	0.0751111	0.00630805	1080.25	87.8883	84.2418	1013.47	31.0758	30.9998	1071.48	173.499	164.27	1012.01	31.0579	30.9832	5.41347
4224A_75	431.713	3.56865	1.88821	0.244269	5.86896	0.172248	0.162402	0.0745983	0.00625331	1076.95	87.7439	84.1095	1014.25	31.0378	30.9647	1057.7	173.531	164.306	1012.03	31.0091	30.9346	4.10788
4224A_5	400.151	21.8857	1.98392	0.264176	5.7837	0.196945	0.26427	0.0778736	0.0054686	1110.06	91.9455	87.9623	1028.07	35.3145	35.2169	1143.65	142.84	136.502	1025.77	35.2535	35.1576	10.1064
4224A_79	400.165	21.8721	2.02395	0.27017	5.79206	0.197228	0.262637	0.0786297	0.00555596	1123.59	92.8064	88.7498	1026.7	35.3838	35.2885	1162.83	143.338	136.95	1026.15	35.3843	35.2886	11.707
4224A_110	114.038	3.60347	1.72872	0.292741	5.74315	0.263579	0.127248	0.071368	0.0098295	1019.28	111.962	106.11	1034.77	46.3019	46.1374	967.972	294.576	269.057	1030.63	47.0678	46.8981	-6.90124
4224A_83	114.045	3.60368	1.71818	0.291113	5.72386	0.262693	0.129846	0.0705459	0.00969674	1015.35	111.766	105.934	1038	46.3837	46.2175	944.286	295.061	269.494	1034.16	47.1748	47.0028	-9.92392
4224A_77	219.058	6.78228	1.75931	0.324345	5.74969	0.311506	0.199282	0.0712239	0.0064772	1030.59	123.005	115.978	1033.69	53.8039	53.5818	963.845	191.481	180.366	1040.24	54.0986	53.8712	-7.24615
4224A_96	115.841	2.35019	1.69873	0.366057	5.59829	0.381089	0.214647	0.0724869	0.00948542	1008.05	142.62	133.258	1059.46	68.2276	67.8684	999.642	277.81	254.964	1059.02	68.202	67.8447	-5.98434
4224A_94	89.9493	7.97556	2.28719	0.525089	5.46596	0.307611	0.151328	0.0830587	0.0106082	1208.34	169.04	156.043	1083.07	58.1214	57.8606	1270.6	259.972	239.577	1079.73	57.9713	57.712	14.7587
4224A_45	186.869	3.66769	2.1822	0.376482	5.47297	0.2273	0.235052	0.0827122	0.00808056	1175.38	123.828	116.71	1081.8	44.1182	43.9691	1262.43	197.08	185.139	1081.71	45.7712	45.6077	14.3086
4224A_102	96.0319	2.73917	2.02262	0.361708	5.37966	0.278946	0.0880054	0.0760869	0.010762	1123.14	125.295	118.012	1099.05	54.5942	54.3625	1097.36	296.871	270.794	1095.41	54.4427	54.215	-0.153915
4224A_35	670.455	2.84687	2.06539	0.20518	5.3948	0.152247	0.175624	0.0774186	0.00493971	1137.41	69.1277	66.8515	1096.21	32.3024	32.2219	1131.99	129.732	124.485	1095.69	32.7263	32.6421	3.16089
4224A_56	637.171	3.57456	1.94702	0.2029	5.3722	0.181009	0.284029	0.0741805	0.00481402	1097.42	71.1399	68.7319	1100.45	37.473	37.3658	1046.38	133.715	128.174	1099.21	37.453	37.3459	-5.16694
4224A_50	619.574	4.37557	2.12049	0.27331	5.3719	0.183196	0.1697	0.0793163	0.00561852	1155.5	90.9389	87.0405	1100.51	37.8677	37.7569	1180.04	143.341	136.946	1101.84	38.5161	38.4013	6.73994
4224A_93	408.992	5.8129	2.37638	0.293018	5.23025	0.170348	0.221091	0.0867412	0.00642682	1235.52	90.0886	86.2612	1127.85	37.094	36.9874	1354.75	146.349	139.629	1125.8	37.6987	37.5873	16.7487
4224A_76	49.815	0.974561	2.27325	0.643025	5.13916	0.282938	0.0742521	0.0879367	0.016084	1204.03	209.96	190.272	1146.16	60.0278	59.7485	1381.1	373.425	332.508	1145.76	62.1247	61.828	17.011
4224A_92	170.851	1.80078	2.4708	0.467744	4.98079	0.213645	0.122672	0.0818527	0.00842738	1263.53	141.667	132.426	1179.46	48.9991	48.8137	1241.99	208.687	195.359	1175.78	48.8844	48.6999	5.0348
4224A_53	61.2741	1.94291	2.4493	0.793428	4.92698	0.325975	0.118771	0.0738363	0.0102928	1257.22	248.123	221.081	1191.22	74.0093	73.5869	1037	295.109	269.409	1184.83	75.0696	74.6362	-14.8725
4224A_80	387.703	2.83399	2.55925	0.359648	4.88813	0.345277	0.250833	0.0838756	0.00870519	1289.08	105.283	100.093	1199.86	79.316	78.8325	1289.67	208.972	195.577	1190.09	80.4551	79.955	6.96357
4224A_52	148.931	1.82562	2.35287	0.457434	4.89872	0.289709	0.182823	0.0816749	0.0103395	1228.43	143.481	134.009	1197.49	66.8915	66.5447	1237.73	258.823	238.635	1196.05	66.8292	66.4849	3.25094
4224A_61	155.165	2.58202	2.24622	0.453277	4.84419	0.277894	0.263296	0.0791079	0.00732078	1195.6	146.973	137.05	1209.79	65.6009	65.2676	1174.84	188.776	177.842	1207.91	65.5214	65.1903	-2.9748
4224A_98	92.0083	1.16941	2.74452	0.750729	4.8135	0.249586	0.0746688	0.0885205	0.0134082	1340.6	214.512	194.002	1216.82	59.9192	59.6422	1393.8	305.361	277.432	1212.29	59.7349	59.4609	12.6983
4224A_4	240.129	4.27402	2.94857	0.312002	4.6892	0.174791	0.173373	0.0891004	0.00637614	1394.48	81.8599	78.6876	1246.14	45.7338	45.5733	1406.32	140.216	134.02	1240.46	48.3498	48.169	11.3899
4224A_9	240.133	4.27429	2.95505	0.31352	4.68394	0.174598	0.179344	0.0885802	0.0063121	1396.14	82.1287	78.9361	1247.41	45.7769	45.6147	1395.1	139.827	133.668	1243.4	48.4447	48.2633	10.5859
4224A_41	50.9132	0.994567	2.67419	0.839828	4.69707	0.261174	0.104045	0.0828527	0.00996353	1321.35	246.46	219.76	1244.24	65.3662	65.0365	1265.75	244.331	226.236	1243.62	65.347	65.0164	1.699
4224A_34	44.7974	2.87501	2.83859	0.92389	4.64187	0.261928	0.0954013	0.0874557	0.0098071	1365.8	260.39	230.764	1257.68	66.8375	66.4929	1370.56	223.815	208.456	1253.23	66.6512	66.3095	8.23535
4224A_19	79.7229	2.3088	2.756	0.661957	4.58065	0.242495	0.209926	0.0859009	0.00967232	1343.71	187.332	171.501	1272.94	63.7147	63.4003	1335.95	225.879	210.273	1270.08	63.6123	63.3002	4.71701
4224A_36	64.2541	3.72069	2.48904	0.633923	4.55299	0.235971	0.0695495	0.0914886	0.018132	1268.85	193.41	176.58	1279.95	62.7436	62.4398	1456.79	402.433	355.142	1276.19	62.6041	62.3018	12.1391
4224A_101	85.8276	2.71372	2.7131	0.605642	4.483	0.226307	0.206692	0.0892335	0.0110563	1332.05	172.763	159.211	1298.05	61.9877	61.6912	1409.18	246.925	228.327	1297.1	63.2814	62.9734	7.88609
4224A_71	402.396	3.11547	2.784	0.358827	4.38621	0.265015	0.453763	0.0864007	0.00740133	1351.25	98.6435	94.0733	1323.94	74.7653	74.3341	1347.16	170.034	161.034	1321.43	76.2226	75.7748	1.72377
4224A_23	191.951	1.9258	3.22199	0.62788	4.3287	0.233165	0.311148	0.0918802	0.00753136	1462.46	156.913	145.654	1339.82	67.8379	67.4814	1464.91	159.858	151.83	1344.5	70.9518	70.5624	8.53895
4224A_72	14.5486	2.56468	5.76209	5.64684	4.35793	0.4227	0.067333	0.0973158	0.0276407	1940.73	1097.61	708.576	1331.7	118.592	117.513	1573.31	584.964	489.545	1352.58	131.36	130.034	15.3563
4224A_51	193.548	2.04944	3.36376	0.575004	4.13066	0.180116	0.175944	0.095243	0.00870094	1496	138.406	129.572	1397.57	58.1506	57.8908	1532.88	177.065	167.236	1397.26	58.1508	57.8899	8.8278
4224A_95	348.77	2.30191	3.39641	0.369393	3.72649	0.140081	0.414394	0.0951763	0.0054395	1503.57	87.1577	83.5708	1532.42	55.2657	55.0288	1531.56	109.57	105.725	1524.2	109.807	105.948	-0.05576
4224A_109	348.771	2.30192	3.43622	0.376489	3.74099	0.140626	0.406157	0.0965392	0.00557531	1512.72	88.0541	84.3945	1527.13	55.2674	55.0303	1558.29	110.347	106.444	1537.05	111.057	107.109	1.99963
4224A_89	304.798	2.35278	3.5259	0.444339	3.67075	0.131875	0.22918	0.0960952	0.00675204	1533.04	102.217	97.318	1553.09	53.838	53.6139	1549.63	134.952	129.162	1544.73	136.027	130.147	-0.223214
4224A_81	304.798	2.35278	3.55654	0.449258	3.68187	0.132275	0.221403	0.0972724	0.00688504	1539.89	102.665	97.7237	1548.92	53.8704	53.6474	1572.47	135.554	129.707	1550.99	137.183	131.204	1.49726
4224A_97	90.4769	3.39448	4.01594	0.997896	3.75196	0.191009	0.0873401	0.0996863	0.010699	1637.43	212.772	192.579	1523.15	72.109	71.7081	1618.24	206.74	193.409	1604.96	207.231	193.847	5.87584
4224A_88	125.089	1.27182	3.75625	0.602564	3.701	0.231768	0.526987	0.101169	0.0082316	1583.45	132.893	124.728	1541.8	88.5868	87.9823	1645.68	154.855	147.244	1637.96	155.108	147.475	6.31193
4224A_66	147.083	0.946519	4.15394	0.725459	3.67972	0.137699	0.14628	0.103101	0.00977603	1664.99	148.202	138.118	1549.73	55.7072	55.4675	1680.68	180.427	170.16	1654.57	183.915	173.272	7.79149
4224A_68	538.803	3.81035	4.05125	0.400736	3.87847	0.197995	0.384819	0.11025	0.00725307	1644.55	82.1956	78.9978	1478.75	70.5779	70.1923	1803.53	122.108	117.29	1765.73	132.003	126.401	18.0081
4224A_63	223.023	1.78743	4.79026	0.838663	3.25418	0.100616	0.233042	0.109276	0.00819989	1783.19	152.666	141.987	1727.39	52.2523	52.0404	1787.39	139.968	133.679	1780.1	140.196	133.889	3.35635
4224A_38	223.02	1.78754	4.78798	0.839376	3.25671	0.100696	0.230013	0.110158	0.00828496	1782.79	152.863	142.158	1726.21	52.1687	51.9573	1802.01	140.04	133.74	1781.78	140.683	134.332	4.2064
4224A_18	276.609	5.94898	4.86684	0.854441	3.2167	0.105775	0.225505	0.112579	0.00751888	1796.53	153.541	142.743	1745.03	55.4789	55.2426	1841.45	123.423	118.495	1810.52	126.363	121.209	5.23652
4224A_2	69.5556	3.85783	5.05759	0.890883	3.37837	0.140909	0.197768	0.116312	0.0126009	1829.02	155.107	144.096	1671.45	65.5397	65.2095	1900.3	201.41	188.573	1880.55	214.247	199.792	12.0429
4224A_11	69.9291	3.85196	5.06921	0.893943	3.37502	0.140782	0.200982	0.115702	0.0125117	1830.97	155.351	144.306	1672.91	65.5856	65.255	1890.85	201.257	188.444	1890.37	208.531	194.807	11.5261
4224A_15	165.847	1.51064	10.1579	1.2701	2.29244	0.125034	0.378356	0.161756	0.012305	2449.25	119	112.412	2333.68	111.339	110.384	2474.1	131.323	125.607	2453.39	131.9	126.14	5.6754
4224A_59	262.711	2.64537	10.4698	1.09215	2.30673	0.113318	0.394948	0.165428	0.0116257	2477.25	99.0613	94.4532	2321.54	100.669	99.8906	2511.91	120.645	115.796	2498.68	121	116.126	7.57851
4224A_107	452.919	2.14414	10.1385	1.03954	2.41438	0.101933	0.529961	0.171725	0.00853146	2447.48	97.0469	92.6203	2234.03	84.8376	84.2827	2574.52	84.2377	81.8393	2522.61	97.9671	94.7444	13.2256
4224A_106	201.216	1.63306	12.2704	2.10779	2.14765	0.0725682	0.368428	0.174557	0.00991748	2625.31	168.042	155.194	2464.34	76.1601	75.7131	2601.82	96.2815	93.1576	2600.54	97.8514	94.6269	5.28399
4224A_20	201.216	1.63305	12.2607	2.10542	2.14809	0.0725827	0.357812	0.175812	0.0100466	2624.57	167.974	155.135	2463.93	76.0629	75.6168	2613.75	96.7358	93.5818	2601.73	98.6078	95.3333	5.73233
4224A_14	133.511	1.76955	13.1749	2.14603	2.06033	0.0996364	0.420527	0.180393	0.0121614	2692.26	159.855	148.185	2550.56	107.224	106.34	2656.49	114.004	109.641	2635.85	114.566	110.164	3.98748
4224A_87	290.051	3.51427	11.611	1.75657	2.23007	0.0744245	0.425203	0.181252	0.00992705	2573.56	146.598	136.724	2388.21	73.314	72.9005	2664.36	92.1998	89.3242	2654.75	97.1403	93.9544	10.3648
4224A_24	144.185	0.68844	12.0269	2.22647	2.2188	0.0695524	0.341192	0.18549	0.0110016	2606.51	181.409	166.524	2398.34	69.8703	69.4927	2702.58	99.618	96.2645	2668.74	105.251	101.52	11.2573
4224A_29	147.824	2.33176	12.6942	2.27935	2.08167	0.0707397	0.360501	0.185139	0.0117921	2657.23	176.456	162.342	2528.93	77.9897	77.5211	2699.45	107.149	103.28	2677.94	107.73	103.823	6.31669
4224A_10	167.071	2.41977	11.0141	2.25186	2.41564	0.093283	0.242589	0.189776	0.0144324	2524.32	199.836	181.921	2233.04	78.5946	78.1183	2740.22	127.916	122.431	2693.18	155.54	147.519	18.5088
4224A_17	221.371	2.89672	13.4721	2.3102	2.08912	0.0880208	0.332123	0.188347	0.0129944	2713.33	168.921	155.942	2521.47	93.8147	93.137	2727.78	115.936	111.415	2695.42	118.694	113.966	7.56336
4224A_54	170.797	1.19514	13.8301	2.69469	2.16138	0.0790666	0.308063	0.188995	0.0119755	2738.14	193.426	176.595	2451.33	81.0637	80.5561	2733.43	106.246	102.435	2712.56	108.108	104.168	10.3205
4224A_99	373.901	5.08941	13.8547	1.60949	1.89197	0.0534509	0.365254	0.189461	0.00796075	2739.82	113.108	107.139	2735.34	71.4981	71.1042	2737.49	69.9836	68.3103	2730.61	70.1895	68.5062	0.078466
4224A_33	373.905	5.08971	14.0319	1.64185	1.8971	0.0535957	0.351801	0.192149	0.00823505	2751.87	114.047	107.982	2729.31	71.6516	71.2554	2760.64	71.2475	69.5113	2741.61	71.844	70.0807	1.13506
4224A_27	148.192	0.851551	12.2511	1.73014	2.06327	0.0680567	0.25822	0.195036	0.0111173	2623.83	137.1	128.427	2547.56	76.5501	76.0968	2785.1	94.9403	91.8805	2754.69	97.0106	93.8216	8.52906
4224A_104	148.462	0.852739	12.2556	1.73106	2.06239	0.0680283	0.268767	0.193563	0.0109771	2624.18	137.126	128.45	2548.46	76.6882	76.2355	2772.68	94.5558	91.5216	2761.2	94.7337	91.6896	8.08662
4224A_1	270.623	2.20682	13.5421	1.41233	1.98727	0.0591769	0.223578	0.200295	0.0100327	2718.23	101.089	96.2947	2627.54	72.4679	72.0627	2828.6	82.9293	80.5812	2780.46	89.2721	86.5624	7.10814
4224A_91	266.674	2.21837	13.4136	1.39147	1.9815	0.0590048	0.234513	0.197882	0.00976731	2709.22	100.469	95.7318	2633.83	72.2653	71.8629	2808.8	81.8497	79.5631	2798.46	83.1852	80.8253	6.22952
4224A_60	131.356	2.77049	13.8576	3.19184	2.15933	0.108502	0.354994	0.201118	0.0144096	2740.03	230.761	207.195	2453.26	107.55	106.659	2835.29	119.305	114.504	2802.15	126.244	120.888	13.4741
4224A_86	175.447	3.00971	14.9698	2.94137	2.07288	0.100555	0.436254	0.208039	0.0145348	2813.32	196.196	178.899	2537.8	107.021	106.14	2890.33	115.702	111.172	2881.95	117.788	113.097	12.197
19091405 (422-05) random, Lettergesh Formation
4225A_37	80.9724	1.72839	0.604429	0.0770208	15.1648	0.482278	0.0829634	0.0645987	0.00520445	480.04	49.338	48.1677	411.663	13.9345	13.918	761.294	174.612	165.428	411.371	17.4837	17.4615	45.9259
4225A_29	198.584	1.34431	0.524786	0.043416	15.0958	0.264454	0.172793	0.0556965	0.00313447	428.344	29.1193	28.7077	413.486	9.18824	9.18313	440.29	127.717	122.829	411.963	9.69832	9.69099	6.08781
4225A_85	120.42	1.21926	0.531083	0.0446254	14.9335	0.359289	0.0979515	0.0587607	0.00402481	432.528	29.8125	29.3812	417.835	11.1225	11.1128	558.243	152.952	145.943	414.372	12.9533	12.9403	25.1517
4225A_26	616.519	1.94429	0.517938	0.0322794	15.025	0.215729	0.303311	0.0563071	0.00222307	423.773	21.7079	21.4785	415.373	8.37944	8.37404	464.5	88.6893	86.301	415.214	8.87576	8.86959	10.5762
4225A_58	179.329	1.96174	0.750512	0.0664202	14.8111	0.350507	0.107293	0.0806957	0.0054648	568.522	38.8971	38.1661	421.179	11.4971	11.4854	1214.04	136.211	130.414	415.449	16.6978	16.6748	65.3077
4225A_20	101.778	2.04185	0.550544	0.0633364	14.8756	0.453495	0.0957378	0.0564583	0.00521937	445.353	41.9056	41.0583	419.412	13.765	13.7502	470.436	211.426	198.332	416.202	15.6586	15.6381	10.8461
4225A_65	98.7729	1.067	0.632261	0.060307	14.9273	0.326434	0.0762306	0.0656462	0.00497222	497.503	37.8661	37.173	418.003	10.3596	10.3512	795.115	162.978	154.934	420.448	14.3335	14.3191	47.4286
4225A_88	175.945	1.34903	0.517942	0.0427609	14.7864	0.28595	0.0915008	0.0530749	0.00361144	423.776	28.807	28.4041	421.861	9.56239	9.55532	332	158.099	150.725	421.056	10.0996	10.0903	-27.0666
4225A_11	290.912	0.735321	0.516409	0.0454133	14.9043	0.257243	0.136111	0.0568148	0.00423252	422.75	30.6387	30.183	418.629	9.38124	9.37445	484.351	168.861	160.397	421.336	9.57181	9.56473	13.5691
4225A_50	923.073	14.496	0.565323	0.0318502	14.8083	0.256469	0.327044	0.0615354	0.00228188	454.985	20.7661	20.5561	421.256	9.07774	9.06995	658.002	80.5296	78.5315	421.857	11.0824	11.0743	35.9796
4225A_101	80.274	1.7227	0.627434	0.0794575	14.6931	0.46733	0.0761162	0.0646374	0.00521348	494.496	50.1902	48.9793	424.452	14.159	14.142	762.555	174.78	165.577	422.48	17.357	17.3351	44.3381
4225A_66	196.335	1.34343	0.545276	0.0444057	14.6446	0.256553	0.147766	0.0557031	0.00314137	441.897	29.3901	28.9708	425.813	9.08716	9.07792	440.554	127.983	123.075	422.699	9.91697	9.90931	3.3459
4225A_96	823.227	13.1196	0.533076	0.0298592	14.6611	0.180958	0.309173	0.0564292	0.00193328	433.849	19.8731	19.6806	425.347	7.45516	7.45232	469.295	76.7559	74.9597	426.202	7.52043	7.516	9.36452
4225A_73	608.638	1.93925	0.537848	0.0325743	14.5954	0.209561	0.272435	0.0563313	0.00223306	437.005	21.6222	21.3944	427.202	8.15541	8.15166	465.451	89.0399	86.6325	428.907	8.8252	8.81779	8.21762
4225A_86	43.3964	1.60401	0.564839	0.0774872	14.5644	0.336318	0.0684911	0.0591929	0.00584456	454.671	50.9123	49.6671	428.081	11.4661	11.4559	574.198	222.272	207.757	429.033	15.0976	15.0814	25.4471
4225A_90	121.662	3.65971	0.550721	0.0664559	14.69	0.305895	0.0724001	0.0584302	0.00618316	445.469	43.987	43.0544	424.539	10.5982	10.5895	545.929	240.001	223.193	429.074	13.0361	13.0229	22.2356
4225A_14	287.734	0.735668	0.536162	0.0464429	14.4895	0.250092	0.125893	0.0569428	0.00424427	435.891	30.9324	30.4685	430.221	9.26656	9.2599	489.32	168.804	160.343	434.66	9.48448	9.47606	12.0778
4225A_84	90.9531	1.83596	0.59835	0.0764705	14.3288	0.375433	0.0823951	0.058223	0.00543952	476.186	49.1698	48.0074	434.887	12.3369	12.3251	538.163	211.224	198.102	435.75	12.8328	12.82	19.1904
4225A_22	445.674	2.58277	0.545635	0.0373137	14.1603	0.22332	0.244314	0.0560572	0.00277817	442.133	24.6617	24.3661	439.89	9.34028	9.33212	454.634	111.92	108.145	436.244	9.67477	9.6675	3.24302
4225A_41	946.713	14.4685	0.590431	0.0319704	14.3214	0.248037	0.31913	0.0617102	0.00229313	471.143	20.5143	20.3091	435.106	9.21639	9.20841	664.082	80.6177	78.615	438.927	11.2902	11.2817	34.4801
4225A_16	93.4236	1.99718	0.613849	0.0537888	13.8684	0.427703	0.0907435	0.0577687	0.00385755	485.985	34.1273	33.5632	448.832	14.9207	14.9049	521.002	149.982	143.252	439.405	18.233	18.2058	13.8521
4225A_23	99.95	1.51442	0.611374	0.0709597	14.0226	0.344824	0.0925019	0.0604426	0.00533872	484.426	45.2139	44.2289	444.063	12.384	12.3721	619.457	196.567	185.098	439.539	14.971	14.9536	28.3141
4225A_78	300.164	1.50648	0.558465	0.0406816	14.0879	0.253032	0.164702	0.0557149	0.00305656	450.527	26.6797	26.3337	442.075	9.55396	9.54694	441.023	124.423	119.779	440.605	9.89948	9.8919	-0.238559
4225A_91	181.302	1.96086	0.821344	0.0700648	13.8655	0.32814	0.104066	0.081428	0.00549615	608.798	39.4409	38.6897	448.924	11.749	11.7383	1231.8	135.399	129.663	441.65	17.4218	17.3984	63.5553
4225A_59	325.603	1.33295	0.583091	0.039311	14.136	0.245761	0.152886	0.0588465	0.00310062	466.446	25.3716	25.0585	440.62	9.37805	9.37261	561.421	116.94	112.798	443.023	10.0853	10.0775	21.5171
4225A_64	302.556	1.78821	0.625151	0.0416926	13.7628	0.252741	0.15348	0.0584793	0.00282818	493.071	26.2178	25.8835	452.16	9.92765	9.92142	547.763	107.423	103.92	444.485	11.7471	11.7364	17.4534
4225A_102	103.046	2.038	0.601725	0.0677948	13.9366	0.424853	0.0907868	0.0569712	0.00525775	478.328	43.4385	42.5288	446.712	14.314	14.2996	490.418	210.311	197.335	444.755	15.4357	15.4186	8.91192
4225A_10	441.1	2.48582	0.679168	0.0498761	13.8326	0.166295	0.131528	0.066051	0.00343399	526.272	30.3861	29.9379	449.954	8.51393	8.50825	807.992	110.724	106.949	445.192	10.982	10.9712	44.312
4225A_19	481.32	5.32369	0.535179	0.0425867	13.7984	0.206067	0.157315	0.0546922	0.00332755	435.241	28.3644	27.9738	451.034	9.33707	9.32888	399.662	139.297	133.517	448.286	9.68395	9.6767	-12.8538
4225A_18	212.235	1.85798	0.576148	0.0549883	13.6917	0.242869	0.118862	0.0560036	0.00413355	461.983	35.7369	35.119	454.425	10.2811	10.2743	452.512	168.197	159.814	452.352	10.2557	10.2476	-0.422906
4225A_69	198.131	1.05244	0.633856	0.0592489	13.9315	0.247489	0.126203	0.0616821	0.0038966	498.495	37.159	36.4913	446.87	9.59421	9.5857	663.105	138.319	132.526	453.146	10.719	10.7086	32.6095
4225A_9	441.852	2.57615	0.566705	0.0378309	13.7554	0.216933	0.222704	0.056106	0.0027873	455.881	24.6674	24.3715	452.395	9.12148	9.11355	456.565	112.157	108.366	455.727	9.58248	9.57396	0.913342
4225A_83	43.8773	1.60277	0.614165	0.0832152	13.6508	0.315215	0.0668719	0.0593693	0.00588119	486.183	53.0325	51.6829	455.74	11.6865	11.6758	580.667	222.778	208.193	456.44	15.6614	15.641	21.5143
4225A_95	123.006	3.65803	0.601885	0.0712512	13.7585	0.286508	0.0676871	0.0589669	0.00623049	478.43	45.6737	44.6689	452.294	10.7491	10.7415	565.874	238.796	222.131	457.076	13.4095	13.3956	20.0717
4225A_2	26.0946	1.56276	1.5267	0.246602	7.08553	0.207961	0.081452	0.0746797	0.00751893	941.173	101.6	96.7577	851.064	26.4201	26.366	1059.89	209.557	196.249	845.069	28.3698	28.3062	19.7029
4225A_45	81.94	3.4292	1.70846	0.144431	6.70432	0.189248	0.172439	0.0743133	0.00461234	1011.71	54.8815	53.4372	896.24	26.4217	26.3664	1049.99	127.692	122.629	891.127	26.8732	26.8174	14.6429
4225A_46	154.839	3.88499	1.55628	0.1269	6.67107	0.177723	0.192231	0.0728339	0.00369049	952.991	51.0423	49.7908	900.408	25.3546	25.3049	1009.33	104.496	101.089	898.413	26.161	26.1079	10.7919
4225A_93	165.774	1.27487	1.58664	0.108596	6.40462	0.118473	0.188744	0.0709381	0.00300886	964.98	43.0832	42.1882	935.275	19.8096	19.7807	955.629	87.9575	85.5377	926.563	21.1231	21.0886	2.12985
4225A_42	116.695	2.77431	1.58567	0.134463	6.42223	0.131762	0.271125	0.0690437	0.00304165	964.598	53.5015	52.1281	932.888	21.6991	21.6614	900.045	92.2051	89.5584	927.59	22.9222	22.883	-3.64903
4225A_110	330.725	1.66875	1.74624	0.105573	6.33712	0.10336	0.234859	0.0731388	0.00257731	1025.77	39.4142	38.6638	944.542	18.3773	18.3499	1017.8	72.2046	70.56	935.547	19.3015	19.2728	7.1978
4225A_107	107.565	2.76277	1.81199	0.192815	6.78719	0.10962	0.166933	0.0832149	0.00534393	1049.8	70.8452	68.4568	886.015	17.1848	17.1593	1274.26	127.893	122.753	942.285	23.2079	23.1676	30.4683
4225A_31	146.487	4.35415	1.76613	0.14195	6.24976	0.126647	0.227277	0.076251	0.00383576	1033.1	52.7866	51.4491	956.811	22.3181	22.2796	1101.67	102.285	99.0012	945.066	24.4932	24.448	13.1488
4225A_1	117.128	1.24507	1.52774	0.116966	6.24879	0.132436	0.173769	0.0721237	0.00371851	941.592	47.5371	46.4497	956.949	23.3782	23.3358	989.432	106.685	103.139	958.362	24.1825	24.1386	3.28301
4225A_38	643.262	2.8248	1.70473	0.0913729	6.18744	0.0957026	0.287702	0.0737349	0.00253367	1010.31	34.5954	34.0158	965.761	19.1463	19.118	1034.22	70.2113	68.6541	963.348	19.7739	19.7436	6.61939
4225A_17	194.954	1.80183	1.63453	0.117093	6.21547	0.0803343	0.20535	0.0767967	0.00370492	983.605	45.6386	44.6351	961.716	17.4918	17.4681	1115.92	97.8177	94.8078	963.765	19.139	19.1106	13.8183
4225A_32	33.4646	2.19289	1.91395	0.248577	6.10695	0.171309	0.107585	0.0752904	0.0073817	1085.96	88.5196	84.8215	977.571	28.7093	28.6469	1076.27	203.369	190.801	966.809	31.5246	31.4465	9.17007
4225A_94	151.573	3.20827	1.51969	0.141483	6.16729	0.130717	0.176657	0.0690644	0.00445933	938.352	57.8303	56.229	968.69	22.4771	22.4392	900.663	136.073	130.385	967.906	23.3278	23.2843	-7.55303
4225A_87	68.3971	1.2601	1.84102	0.160294	6.07192	0.117985	0.127423	0.0786875	0.0051815	1060.23	58.1127	56.4957	982.802	21.4272	21.3917	1164.29	133.336	127.791	969.367	22.329	22.2904	15.5875
4225A_55	146.026	3.99015	1.51825	0.127422	6.09514	0.103067	0.163253	0.0708679	0.00393007	937.771	52.0387	50.7387	979.329	19.7963	19.7647	953.605	115.544	111.405	971.017	20.709	20.6785	-2.69757
4225A_70	143.849	3.5409	1.65935	0.120151	6.15399	0.0953784	0.194052	0.072495	0.00324635	993.127	46.4017	45.3652	970.634	18.454	18.4289	999.869	92.3021	89.6346	973.021	19.5126	19.4831	2.92391
4225A_33	340.718	3.59877	1.66785	0.107503	6.06724	0.0926575	0.26967	0.0755566	0.00286058	996.369	41.3332	40.5087	983.505	19.4213	19.3909	1083.35	76.8758	75.0075	975.194	20.6705	20.636	9.21606
4225A_3	175.997	4.20544	1.72635	0.127149	6.03221	0.112234	0.192637	0.0718568	0.00320709	1018.39	47.9151	46.8108	988.8	22.2313	22.1944	981.886	92.2464	89.5847	983.477	22.7058	22.6671	-0.704094
4225A_43	188.805	5.01741	1.68639	0.130563	6.05456	0.120998	0.197966	0.0745934	0.00444263	1003.4	49.9589	48.7593	985.415	22.4412	22.4009	1057.57	122.288	117.634	983.878	22.7228	22.6829	6.82257
4225A_39	272.947	4.61653	1.7678	0.110987	6.01191	0.111112	0.242773	0.0764284	0.00302831	1033.71	41.1299	40.3132	991.894	21.6531	21.6181	1106.32	80.2248	78.1901	984.398	23.4704	23.4264	10.3425
4225A_48	61.8788	2.62787	1.87238	0.187601	6.03539	0.168193	0.3451	0.0767841	0.00389942	1071.37	67.4237	65.2568	988.316	28.5702	28.5085	1115.59	103.062	99.7263	989.554	33.117	33.0321	11.4086
4225A_63	185.063	2.6755	1.64356	0.122463	6.02833	0.094464	0.125976	0.0726592	0.00407862	987.08	47.5911	46.5012	989.391	18.9416	18.9124	1004.46	116.063	111.875	990.571	19.8119	19.7803	1.50045
4225A_100	635.919	2.83067	1.76639	0.0913174	6.01003	0.0929593	0.243207	0.073839	0.0025523	1033.19	33.7971	33.2441	992.182	18.9122	18.8859	1037.07	70.6025	69.0278	991.362	19.8531	19.8239	4.32835
4225A_28	216.64	3.37924	1.65732	0.11928	5.97056	0.111597	0.210523	0.0713202	0.00302635	992.352	46.0971	45.0738	998.259	22.15	22.1106	966.605	87.8454	85.4305	994.736	23.5344	23.4914	-3.27479
4225A_98	80.1238	2.32167	1.85526	0.164749	5.92315	0.123424	0.119379	0.0711567	0.00459029	1065.3	59.4496	57.7589	1005.66	22.9464	22.9058	961.919	134.645	129.055	1003.19	23.1529	23.1115	-4.54689
4225A_97	402.68	4.8949	1.89485	0.107448	5.9728	0.0685747	0.284603	0.0813888	0.00260034	1079.29	38.0418	37.3424	997.911	16.2364	16.216	1230.85	63.355	62.0706	1004.95	21.737	21.7004	18.925
4225A_12	142.795	3.55161	1.73039	0.122869	5.95129	0.0922363	0.180919	0.0728242	0.00327125	1019.89	46.2149	45.1865	1001.25	18.8158	18.7884	1009.07	92.463	89.7851	1005.2	19.6406	19.6107	0.774182
4225A_62	633.003	3.84544	1.75109	0.0913326	5.91336	0.0788382	0.35673	0.0731487	0.00224569	1027.57	33.9923	33.4325	1007.2	17.74	17.7156	1018.08	62.8084	61.5603	1006.33	17.7477	17.7232	1.06839
4225A_25	173.788	4.20852	1.79242	0.129023	5.86548	0.109125	0.189532	0.0719967	0.00321634	1042.7	47.466	46.3819	1014.8	22.0892	22.0526	985.848	92.2778	89.6134	1007.02	22.8823	22.8418	-2.93731
4225A_5	104.953	1.07591	2.07745	0.202371	5.89072	0.128953	0.144992	0.0781166	0.00499793	1141.39	67.8935	65.6967	1010.78	25.0949	25.0449	1149.84	129.75	124.497	1011.71	27.0461	26.9881	12.0938
4225A_104	385.425	4.90959	1.79488	0.109844	5.85328	0.0963322	0.210083	0.0727177	0.00261585	1043.6	40.3034	39.5192	1016.76	19.8552	19.8246	1006.1	73.8585	72.1401	1012.49	20.2511	20.2207	-1.06014
4225A_89	182.616	2.67485	1.71354	0.125214	5.83357	0.0914135	0.113956	0.0730227	0.00410526	1013.61	47.4028	46.3216	1019.94	19.3394	19.3118	1014.58	116.062	111.872	1021.83	20.5515	20.5189	-0.528001
4225A_108	199.449	1.79729	1.78709	0.120959	5.81607	0.0751738	0.187938	0.0774905	0.00371797	1040.77	44.5523	43.596	1022.78	17.3951	17.3729	1133.84	97.0151	94.0511	1026.25	18.0106	17.9839	9.79554
4225A_60	136.668	3.21302	1.94966	0.135502	5.71947	0.0899141	0.218576	0.0814041	0.00385745	1098.33	47.1887	46.117	1038.73	19.8767	19.8447	1231.22	94.4361	91.6105	1028.66	22.8384	22.798	15.6336
4225A_81	185.536	2.59895	1.90683	0.132679	5.79989	0.099586	0.223428	0.0777324	0.00329887	1083.48	46.883	45.8249	1025.41	20.624	20.5926	1140.04	85.5758	83.2599	1035.01	22.6244	22.5848	10.0547
4225A_105	626.104	3.8472	1.82482	0.0913261	5.72796	0.0763663	0.337324	0.0735257	0.0022682	1054.42	33.0956	32.5646	1037.31	18.0805	18.0565	1028.48	63.0151	61.7587	1038.38	18.122	18.0967	-0.858549
4225A_53	76.5071	3.53294	2.57758	0.244339	5.59251	0.0949536	0.16957	0.0848971	0.00472032	1294.3	70.5596	68.1899	1060.47	21.3741	21.3375	1313.19	109.804	105.986	1057.79	25.187	25.1364	19.2444
4225A_30	449.502	3.71182	1.96389	0.126874	5.54336	0.0602511	0.329242	0.077547	0.00247994	1103.22	43.9369	43.0065	1069.14	18.2169	18.1913	1135.29	64.3089	62.993	1062.82	18.3849	18.3588	5.82688
4225A_52	91.1375	3.09154	2.11494	0.179822	5.5029	0.12802	0.157443	0.0840351	0.00421599	1153.69	59.4797	57.7872	1076.38	26.832	26.7774	1293.37	99.1824	96.0596	1070.45	31.0957	31.0221	16.777
4225A_56	272.623	4.35937	1.86938	0.113295	5.49879	0.0896283	0.250147	0.0755151	0.00312155	1070.31	40.4925	39.7009	1077.12	21.1574	21.1215	1082.24	84.046	81.8185	1074.17	21.3886	21.352	0.473553
4225A_47	52.9852	3.35057	1.8171	0.180029	5.47306	0.163429	0.145841	0.073915	0.00567145	1051.64	65.9483	63.874	1081.78	32.8688	32.7851	1039.15	158.907	151.145	1083.21	32.9083	32.8245	-4.10259
4225A_80	363.264	3.4391	1.93411	0.111233	5.47668	0.0634627	0.293809	0.0765938	0.00247848	1092.96	38.8628	38.1332	1081.12	17.6429	17.6177	1110.63	65.3183	63.9626	1084.07	17.7494	17.725	2.65731
4225A_51	74.0564	3.01092	1.79043	0.180644	5.43536	0.116856	0.135612	0.0755838	0.00485898	1041.98	66.8201	64.6913	1088.68	25.6127	25.563	1084.07	131.675	126.287	1086.83	26.7	26.646	-0.425711
4225A_8	1360.11	7.0049	1.87979	0.104326	5.41537	0.0769083	0.324538	0.0757154	0.00260833	1073.99	37.1213	36.4552	1092.38	21.2931	21.2569	1087.56	69.8266	68.2818	1090.2	21.2654	21.2289	-0.443563
4225A_7	180.539	2.6223	2.12749	0.181259	5.4018	0.0729972	0.201387	0.079224	0.00396296	1157.77	59.7175	58.0117	1094.9	20.721	20.6879	1177.74	100.558	97.3693	1090.23	21.2027	21.1694	7.03324
4225A_61	57.6835	3.91154	2.12036	0.223141	5.35873	0.11138	0.20494	0.0783598	0.00428432	1155.45	73.9414	71.3434	1102.99	25.0782	25.0282	1156.01	110.435	106.605	1092.01	28.1139	28.0527	4.58638
4225A_68	444.601	3.71361	2.03787	0.128274	5.38493	0.0585292	0.281288	0.0775848	0.00249662	1128.25	43.3334	42.4282	1098.06	17.5539	17.5299	1136.26	64.7048	63.3726	1094.11	17.7801	17.7545	3.36234
4225A_76	560.066	11.8735	2.21143	0.135252	5.30965	0.060888	0.189067	0.0848781	0.00321274	1184.66	43.2206	42.3196	1112.36	18.0782	18.0518	1312.76	74.325	72.5559	1107.68	18.9845	18.9578	15.2655
4225A_4	359.989	3.43563	2.00964	0.112447	5.30645	0.0614903	0.27405	0.0768941	0.00250788	1118.77	38.2958	37.587	1112.97	17.859	17.833	1118.44	65.764	64.3895	1114.19	17.9166	17.8915	0.489162
4225A_36	333.272	43.949	2.19551	0.142998	5.16646	0.0778108	0.322996	0.0797215	0.00289332	1179.62	45.954	44.9373	1140.61	22.0255	21.9869	1190.11	72.498	70.8248	1138.98	22.2737	22.2354	4.15904
4225A_79	544.042	11.8813	2.30295	0.137209	5.14266	0.0589723	0.170506	0.0852472	0.00324395	1213.2	42.6245	41.7483	1145.45	18.3	18.2742	1321.17	74.6383	72.8534	1141.67	18.78	18.7516	13.3004
4225A_92	1440.2	5.22916	2.08343	0.105049	5.1417	0.0806478	0.335303	0.0767737	0.00250108	1143.36	34.891	34.3017	1145.64	21.6991	21.6626	1115.32	65.7181	64.3457	1145.41	21.7965	21.7599	-2.71887
4225A_24	346.712	4.12595	2.0949	0.144032	5.05142	0.0761069	0.303067	0.0788468	0.00307618	1147.13	47.8128	46.7132	1164.38	22.8711	22.8307	1168.29	78.255	76.3109	1162.68	23.2063	23.1658	0.335276
4225A_71	241.062	3.30653	2.32074	0.139992	4.8383	0.0745693	0.201857	0.0823125	0.00362922	1218.65	43.2631	42.3605	1211.13	22.5947	22.5552	1252.96	87.4976	85.0641	1198.94	23.7241	23.6806	3.33881
4225A_6	100.873	1.89399	2.37215	0.162884	4.70702	0.072586	0.228665	0.0824212	0.00334589	1234.25	49.6478	48.463	1241.85	24.6906	24.6421	1255.54	80.4386	78.3769	1235.47	26.3615	26.3077	1.09052
4225A_72	336.84	4.64333	2.6299	0.167043	4.6097	0.0877628	0.345269	0.0875787	0.00314507	1309.04	47.2724	46.1971	1265.65	26.8216	26.7673	1373.26	69.875	68.3042	1265.8	27.8918	27.8303	7.83581
4225A_103	98.8583	2.17586	2.65069	0.182305	4.61931	0.0743524	0.162013	0.0866123	0.00391629	1314.84	51.349	50.0826	1263.26	23.8366	23.7924	1351.88	88.5101	86.0071	1269.28	24.0431	23.9971	6.5553
4225A_49	507.798	1.93948	2.75233	0.159515	4.36904	0.0725772	0.286935	0.0870894	0.00316483	1342.72	43.6301	42.7122	1328.64	26.1846	26.1316	1362.47	70.8254	69.2129	1324.68	26.1657	26.1125	2.48298
4225A_99	82.9951	1.4025	3.24088	0.297992	4.24288	0.0696625	0.24323	0.0947134	0.00358373	1467	72.6309	70.1226	1364.25	27.0373	26.9795	1522.38	72.1831	70.4952	1384.09	29.2917	29.2252	10.3873
4225A_21	96.1259	2.85622	3.27658	0.332145	4.09954	0.0856845	0.312278	0.0959899	0.00357298	1475.51	80.433	77.368	1407.09	32.7776	32.6947	1547.57	70.7576	69.1329	1404.4	34.4248	34.3343	9.07743
4225A_44	764.792	2.66547	3.29517	0.185347	4.08454	0.0626094	0.286802	0.0962546	0.0031764	1479.91	44.2958	43.3501	1411.73	26.6779	26.6215	1552.75	62.604	61.3282	1420.04	28.0225	27.963	9.08151
4225A_106	298.749	4.45376	3.39229	0.208755	3.99297	0.0475686	0.237185	0.0927719	0.00388202	1502.62	48.8415	47.6944	1440.74	22.9558	22.9151	1483.23	80.3522	78.2701	1437.32	23.4485	23.4061	2.86468
4225A_34	400.723	5.28433	3.42783	0.198779	3.95317	0.0679058	0.455058	0.0930863	0.00275676	1510.8	46.103	45.0798	1453.73	29.5705	29.5038	1489.64	56.5975	55.5563	1449.01	29.8628	29.7925	2.41084
4225A_109	84.945	1.40593	3.5405	0.314902	3.97134	0.0652058	0.217013	0.0955818	0.0035849	1536.31	71.6708	69.2272	1447.77	27.1883	27.1301	1539.57	71.3794	69.7267	1459.25	28.0895	28.027	5.96233
4225A_54	144.665	1.34778	3.27132	0.226925	4.04442	0.0615146	0.199756	0.0961061	0.00359541	1474.26	54.6741	53.2409	1424.3	26.2765	26.2217	1549.85	71.0986	69.4578	1473.83	29.3875	29.3207	8.10073
4225A_75	396.352	5.28696	3.55382	0.199692	3.83984	0.0659594	0.422355	0.0931823	0.0027803	1539.29	45.0215	44.045	1492.03	29.1762	29.1117	1491.6	57.011	55.9547	1491.39	29.5019	29.4332	-0.0290293
4225A_82	677.581	4.54073	3.66958	0.187838	3.69544	0.0563855	0.403954	0.0993432	0.0031154	1564.78	41.2609	40.4393	1543.87	27.9882	27.9276	1611.82	59.0014	57.8641	1594.1	59.4931	58.3375	4.21574
4225A_74	386.048	4.87915	3.76718	0.227053	3.68804	0.045666	0.310852	0.0993463	0.00308633	1585.78	48.946	47.7942	1546.62	25.1992	25.149	1611.88	58.4434	57.3269	1594.55	58.9313	57.7976	4.04833
4225A_67	404.562	2.63958	3.95114	0.221253	3.76262	0.0518888	0.237347	0.103872	0.00337551	1624.22	45.8893	44.8752	1519.31	26.1728	26.1195	1694.43	60.5142	59.3134	1664.38	65.7536	64.3405	10.3355
4225A_35	128.91	1.60052	4.19456	0.35366	3.61275	0.0591151	0.327464	0.102958	0.00391018	1672.96	70.334	67.9794	1575.21	30.7746	30.7011	1678.11	70.9916	69.3461	1665.15	71.3328	69.672	6.132
4225A_15	71.0916	2.86848	4.10857	0.326016	3.74699	0.057596	0.21157	0.108132	0.00568089	1656.01	65.8557	63.7869	1524.95	29.5333	29.4657	1768.18	97.5356	94.4426	1695.97	116.114	111.771	13.756
4225A_57	162.589	4.00661	3.84221	0.276063	3.6789	0.0584798	0.461827	0.106821	0.00314181	1601.64	58.73	57.0789	1550.03	28.9084	28.8452	1745.88	54.3616	53.3883	1697.76	58.7836	57.6496	11.2174
4225A_27	306.972	3.50571	5.26387	0.350704	2.98381	0.0438345	0.375605	0.115795	0.00395188	1863.02	57.6605	56.0683	1863.25	34.1387	34.0486	1892.28	62.045	60.7712	1879.41	64.2302	62.8674	1.53402
4225A_40	127.65	2.53848	8.8899	0.624035	2.35311	0.0341132	0.280976	0.158003	0.0056349	2326.76	65.1012	63.079	2283	39.5541	39.4317	2434.4	61.0698	59.8061	2410.95	64.9399	63.5142	6.21919
4225A_13	203.897	3.84187	9.35202	0.596731	2.38537	0.0406961	0.300901	0.161324	0.00543842	2373.14	59.3909	57.7029	2256.95	44.0091	43.8607	2469.59	57.4874	56.3642	2447.67	62.5782	61.2513	8.61035
4225A_77	203.226	3.88777	9.69855	0.601404	2.32137	0.0396044	0.274772	0.161703	0.0054711	2406.57	57.896	56.2908	2309.24	43.0625	42.919	2473.55	57.6759	56.5461	2453.96	60.7086	59.4592	6.64284
19091406 (422-06), Loch Muck Formation
4226A_11	316.345	2.55657	0.508405	0.0441627	15.0857	0.448247	0.27455	0.0531552	0.00372604	417.376	29.9479	29.5127	413.753	12.9993	12.9862	335.427	162.89	155.073	413.391	13.8774	13.861	-23.3511
4226A_14	318.447	3.0545	0.532746	0.0392688	15.2629	0.437362	0.232675	0.0583569	0.00337535	433.63	26.1822	25.8486	409.099	12.4802	12.4682	543.188	129.005	123.988	414.64	13.7261	13.7115	24.6855
4226A_16	469.706	2.86339	0.489626	0.0374656	14.7242	0.461588	0.245345	0.0525961	0.00337194	404.656	25.6999	25.3786	423.585	13.9174	13.9024	311.412	149.299	142.716	414.869	15.5002	15.4816	-36.021
4226A_54	479.387	2.53259	0.482303	0.0293381	15.1174	0.44193	0.325063	0.0556546	0.00277255	399.651	20.1968	19.9979	412.912	12.874	12.8626	438.614	112.829	108.997	415.319	13.4838	13.4682	5.85982
4226A_89	322.491	3.05519	0.541373	0.0390884	15.1707	0.434698	0.23559	0.0588807	0.00338005	439.329	25.9143	25.5878	411.506	12.591	12.5788	562.686	127.589	122.674	416.117	13.5556	13.5428	26.8675
4226A_45	312.898	2.55784	0.516871	0.0443409	14.8748	0.441976	0.274437	0.0533172	0.00373274	423.059	29.9005	29.4666	419.433	13.1854	13.1733	342.32	162.48	154.697	417.423	14.0259	14.0106	-22.5266
4226A_93	462.599	2.87238	0.495975	0.0374086	14.5757	0.456933	0.242798	0.0527696	0.00337837	408.974	25.5509	25.2334	427.758	14.0668	14.0514	318.901	148.885	142.334	418.08	16.0521	16.0321	-34.135
4226A_77	401.829	2.30559	0.499486	0.0284853	14.9404	0.674933	0.492413	0.0542733	0.00284427	411.355	19.3811	19.1979	417.649	19.0434	19.0139	382.405	119.989	115.681	418.584	25.2966	25.2485	-9.21648
4226A_83	323.193	1.02723	0.483361	0.0367412	15.021	0.512349	0.301765	0.0525003	0.00295521	400.377	25.3068	24.9955	415.479	14.7471	14.7302	307.261	130.813	125.733	418.744	17.4407	17.4156	-35.2204
4226A_61	405.722	2.66067	0.540026	0.0406919	14.8184	0.651157	0.441038	0.0567191	0.00325269	438.442	27.0083	26.6536	420.979	18.6904	18.6619	480.629	129.278	124.259	419.187	20.4784	20.4473	12.4109
4226A_99	291.453	2.81469	0.562358	0.0515	14.613	0.596423	0.301539	0.0549033	0.00395	453.06	33.7162	33.1656	426.703	17.7346	17.7102	408.287	164.977	156.927	419.602	19.6867	19.6552	-4.51038
4226A_35	55.2894	2.90279	0.56865	0.0773453	14.6844	0.529111	0.108949	0.0600779	0.00625882	457.141	50.6929	49.4583	424.696	15.7763	15.7584	606.383	233.685	217.664	419.744	18.1416	18.1176	29.9624
4226A_76	488.025	2.5222	0.488625	0.0296051	14.904	0.435692	0.324314	0.0554635	0.00275908	403.973	20.2946	20.0938	418.636	13.001	12.9879	430.955	112.817	108.987	419.967	13.722	13.7073	2.85844
4226A_81	133.918	1.6879	0.592349	0.0595127	14.7735	0.509001	0.166662	0.0593337	0.00473175	472.367	38.3082	37.599	422.216	15.0948	15.0758	579.361	178.149	168.7	420.995	16.8535	16.833	27.1238
4226A_21	337.605	2.32572	0.559086	0.0455786	14.8303	0.747474	0.235849	0.0566893	0.00433446	450.931	29.903	29.4691	420.651	21.2092	21.1744	479.468	173.581	164.652	423.002	22.1963	22.1582	12.2671
4226A_57	294.667	2.81337	0.565138	0.0517764	14.4998	0.591803	0.30017	0.054744	0.00393472	454.866	33.8708	33.3151	429.925	17.8265	17.8033	401.782	165.153	157.089	423.81	19.8439	19.8134	-7.0046
4226A_38	565.014	2.64267	0.527072	0.0344258	14.6312	0.444257	0.35255	0.0557318	0.00279851	429.864	23.0204	22.7625	426.19	13.6036	13.5878	441.701	113.681	109.792	424.073	13.9884	13.9732	3.51176
4226A_103	190.427	1.40906	0.535398	0.0444995	14.1858	0.583708	0.331391	0.0515046	0.00312987	435.386	29.6435	29.217	439.124	18.3676	18.3428	263.477	142.584	136.586	424.296	21.3054	21.2702	-66.6654
4226A_67	330.249	1.03373	0.489664	0.0372382	14.8268	0.505723	0.297534	0.052346	0.00294267	404.682	25.5421	25.2251	420.748	14.8821	14.8635	300.552	130.797	125.72	424.701	16.7516	16.7314	-39.9919
4226A_69	55.898	2.90132	0.575419	0.078274	14.5096	0.522807	0.107704	0.0599151	0.00623965	461.513	51.0861	49.8324	429.647	15.9138	15.8928	600.509	233.834	217.799	425.286	18.335	18.3089	28.4529
4226A_78	482.67	2.37018	0.59231	0.0401941	14.4165	0.587444	0.490249	0.0578473	0.00313553	472.342	25.794	25.4705	432.329	17.922	17.8957	523.983	121.14	116.711	426.038	18.7579	18.7306	17.4918
4226A_95	305.945	1.24336	0.532002	0.0392066	14.0635	0.375248	0.246196	0.0534148	0.00324528	433.137	26.1532	25.8205	442.816	12.7656	12.7529	346.457	140.426	134.574	426.634	14.1499	14.1358	-27.8129
4226A_66	135.395	1.68709	0.599588	0.0602592	14.5988	0.502978	0.164977	0.0591792	0.00471621	476.972	38.616	37.8953	427.104	15.2174	15.2008	573.696	178.197	168.746	426.841	17.0356	17.0131	25.5522
4226A_27	150.698	2.74263	0.595219	0.0529153	14.3609	0.561014	0.273819	0.0557674	0.00392535	474.195	33.9638	33.4052	433.947	17.2672	17.244	443.119	160.469	152.826	431.329	21.0345	21.0002	2.06974
4226A_41	97.5437	2.01247	0.600112	0.0690499	14.0392	0.723399	0.186076	0.0572774	0.00570138	477.305	44.2966	43.3509	443.556	22.7896	22.7508	502.229	226.964	211.915	437.041	24.7997	24.7521	11.6826
4226A_12	391.126	2.35437	0.519272	0.0354271	14.3508	0.504036	0.316773	0.0561951	0.00291289	424.665	23.8163	23.5402	434.242	15.7357	15.7164	460.087	117.042	112.919	437.483	17.0377	17.0166	5.6175
4226A_17	105.517	2.08648	0.50516	0.0571839	14.1089	0.63173	0.112936	0.0562087	0.00540997	415.189	38.9475	38.2144	441.439	19.8903	19.8596	460.623	220.806	206.572	437.831	21.6418	21.6041	4.16477
4226A_88	165.206	1.83177	0.598015	0.0513221	14.2651	0.405905	0.0958838	0.0602052	0.00471763	475.973	32.8749	32.3512	436.765	13.252	13.2384	610.958	174.018	164.974	438.18	14.5256	14.5092	28.5114
4226A_90	236.594	1.79258	0.581814	0.0455508	14.2335	0.519645	0.206129	0.0590123	0.00383003	465.626	29.4521	29.0309	437.704	16.4461	16.4237	567.548	144.515	138.239	438.593	18.8119	18.7845	22.8782
4226A_58	96.6184	2.84537	0.638572	0.0740476	14.1558	0.833536	0.177302	0.0621523	0.00556307	501.421	46.4118	45.3748	440.026	25.6642	25.6146	679.354	197.268	185.68	440.554	26.7581	26.7013	35.2288
4226A_36	702.412	1.70344	0.598444	0.0403223	14.0728	0.48119	0.241025	0.0588193	0.00314559	476.246	25.7769	25.4538	442.534	15.6364	15.616	560.413	118.744	114.476	441.359	17.1611	17.1382	21.0343
4226A_51	288.391	2.58586	0.53866	0.0493458	14.1534	0.492802	0.21053	0.0552556	0.00461472	437.541	32.828	32.3058	440.096	15.8234	15.804	422.582	192.001	181.173	441.796	16.2216	16.2012	-4.14455
4226A_24	227.292	2.42614	0.583282	0.0423506	13.8657	0.465922	0.188758	0.0564275	0.00334785	466.569	27.3433	26.9802	448.918	15.6195	15.6005	469.228	134.109	128.72	442.185	20.7173	20.684	4.32841
4226A_33	182.504	1.76229	0.566747	0.0486782	13.963	0.637611	0.506697	0.0549196	0.00339244	455.909	31.7951	31.305	445.895	20.4468	20.413	408.95	141.24	135.297	442.296	24.883	24.8365	-9.03396
4226A_7	124.763	2.58715	0.578492	0.0529387	14.0951	0.390789	0.137128	0.0592276	0.00466898	463.492	34.342	33.7712	441.857	13.0677	13.0531	575.472	176.16	166.917	442.667	14.3575	14.3415	23.2184
4226A_100	101.452	2.1296	0.587677	0.071388	14.2393	0.428488	0.171992	0.0575391	0.00472646	469.383	46.1765	45.1499	437.531	13.9089	13.8953	512.256	185.799	175.585	442.816	14.8096	14.7912	14.5876
4226A_109	271.362	1.52755	0.532355	0.0336058	13.7068	0.436954	0.333626	0.0540779	0.00276062	433.372	22.3912	22.147	453.943	15.1541	15.1377	374.294	116.994	112.895	442.878	16.3151	16.2944	-21.2798
4226A_80	415.483	2.75124	0.555097	0.0343641	13.9675	0.468029	0.317163	0.0549289	0.00306191	448.33	22.5625	22.3147	445.757	15.5194	15.5008	409.329	127.173	122.335	443.057	16.5517	16.5305	-8.89931
4226A_101	126.935	2.04421	0.647407	0.0590441	14.057	0.468218	0.189878	0.0639511	0.00448868	506.882	36.7221	36.0696	443.014	15.3551	15.3368	740.013	152.105	145.096	443.951	17.7935	17.7689	40.1343
4226A_1	151.789	1.58454	0.56862	0.0694277	13.9339	0.473428	0.153812	0.0560597	0.00568367	457.122	45.446	44.4512	446.795	15.705	15.6859	454.732	233.274	217.45	444.21	16.2772	16.2567	1.74556
4226A_6	135.57	2.07859	0.516551	0.0450214	13.586	0.441256	0.338702	0.0508701	0.0027751	422.845	30.3694	29.9219	457.841	15.4573	15.4389	234.95	128.378	123.504	444.497	21.5849	21.5503	-94.8677
4226A_25	482.695	1.94792	0.566326	0.0368061	14.0083	0.39345	0.278453	0.0568289	0.00291653	455.636	24.0011	23.7208	444.501	13.2936	13.2813	484.899	115.36	111.346	444.544	14.6391	14.6225	8.33116
4226A_39	445.456	4.29406	0.660603	0.045611	13.6583	0.521092	0.210957	0.0646124	0.00423313	514.983	28.0824	27.6992	455.5	17.7114	17.6857	761.74	141.241	135.171	444.722	18.4349	18.4085	40.2028
4226A_98	162.291	2.88053	0.572033	0.0544578	14.1181	0.650113	0.138843	0.0572513	0.00480771	459.329	35.4828	34.8734	441.162	20.4489	20.4165	501.227	190.434	179.726	444.853	22.4991	22.4599	11.9836
4226A_22	55.231	1.74102	0.613068	0.086453	13.4732	0.492987	0.0661729	0.0570396	0.00687211	485.493	55.1624	53.7036	461.538	17.2765	17.2534	493.063	277.269	255.143	446.512	22.1427	22.1033	6.39372
4226A_56	206.571	2.37412	0.600237	0.0470532	13.9227	0.402543	0.256965	0.055975	0.00327373	477.384	30.0778	29.6389	447.142	13.6958	13.6827	451.375	132.574	127.311	447.586	14.1886	14.1716	0.93789
4226A_108	103.647	1.62805	0.573722	0.0729426	13.8587	0.457392	0.160768	0.0567382	0.00600374	460.419	47.6172	46.5264	449.136	15.4367	15.4182	481.37	242.713	225.602	447.611	17.232	17.209	6.6964
4226A_92	181.697	3.57486	0.588305	0.0468955	13.6513	0.414845	0.343947	0.0566348	0.00275409	469.784	30.2032	29.7605	455.724	14.5922	14.5743	477.342	109.348	105.737	447.642	19.7247	19.6945	4.52864
4226A_19	75.1859	2.23461	0.551825	0.0664584	13.6455	0.526803	0.233196	0.0548914	0.0055706	446.192	43.9571	43.0256	455.911	17.9211	17.8962	407.803	235.467	219.4	447.7	28.3737	28.3128	-11.797
4226A_15	113.814	1.44374	0.657678	0.0709386	13.7607	0.41187	0.215157	0.0624152	0.00525164	513.193	43.9239	42.9939	452.225	14.2358	14.2201	688.366	184.81	174.595	449.536	16.1719	16.1502	34.3046
4226A_73	130.712	1.86887	0.514806	0.0594766	13.6857	0.48832	0.106184	0.0502548	0.0053043	421.676	40.2638	39.4813	454.618	16.6827	16.661	206.798	254.457	236.026	449.8	19.7496	19.7194	-119.837
4226A_49	310.256	1.45595	0.582156	0.042995	14.0119	0.514476	0.467777	0.0587571	0.00298603	465.846	27.7822	27.4072	444.391	16.7422	16.7219	558.107	112.779	108.922	450.044	19.9829	19.9519	20.3754
4226A_97	194.732	1.99585	0.603228	0.0461705	13.6592	0.305564	0.119381	0.0546158	0.00316644	479.28	29.454	29.0329	455.471	11.4432	11.4331	396.528	132.675	127.422	451.055	11.8183	11.8089	-14.8647
4226A_85	293.024	2.15742	0.746714	0.0660389	13.4441	0.574857	0.103157	0.0695814	0.00578572	566.316	38.7566	38.0307	462.503	19.9915	19.9592	916.026	175.927	166.526	451.604	28.9453	28.8804	49.5099
4226A_107	196.956	2.01729	0.533588	0.045039	14.2739	0.482998	0.306798	0.0562749	0.00384619	434.188	30.0414	29.6031	436.504	15.3534	15.3351	463.229	155.152	147.986	452.436	19.7975	19.7657	5.76935
4226A_37	200.312	2.5602	0.618769	0.0507982	13.8005	0.448321	0.158806	0.0585816	0.0035079	489.076	32.1161	31.6161	450.966	15.2098	15.192	551.582	133.461	128.096	452.634	16.1312	16.1124	18.2414
4226A_26	155.579	2.97362	0.593568	0.0597509	13.4829	0.465378	0.348459	0.0545752	0.00388027	473.144	38.4333	37.7193	461.219	16.4034	16.384	394.863	163.526	155.62	452.984	19.0698	19.0416	-16.8048
4226A_110	685.477	2.01703	0.562468	0.0299004	13.877	0.42872	0.31378	0.0565687	0.00232407	453.131	19.5247	19.3386	448.565	14.6026	14.5876	474.759	92.1773	89.5983	453.065	15.8992	15.881	5.51724
4226A_79	151.668	1.95351	0.603796	0.0560937	14.2655	0.643361	0.162971	0.0595705	0.00488054	479.64	35.8278	35.2066	436.753	19.8472	19.8167	588.011	182.891	172.941	453.729	27.6681	27.6103	25.7237
4226A_18	109.618	1.95894	0.684848	0.0565939	13.5626	0.520247	0.243948	0.0604637	0.00462484	529.7	34.3963	33.8234	458.603	17.9221	17.8959	620.21	169.486	160.891	453.866	20.6898	20.6567	26.0569
4226A_13	202.596	2.60275	0.569209	0.0583789	13.6366	0.683596	0.261438	0.0572971	0.00490873	457.503	38.1309	37.4279	456.201	22.8209	22.7806	502.986	194.339	183.199	454.738	23.08	23.0389	9.30159
4226A_102	123.167	2.42716	0.624836	0.0627916	13.4687	0.711974	0.257437	0.0570083	0.00453519	492.874	39.6234	38.8651	461.687	24.3008	24.2565	491.853	180.414	170.78	455.133	26.4909	26.4352	6.13319
4226A_59	636.895	2.17343	0.60052	0.0365681	13.6335	0.518458	0.423082	0.0557092	0.00266954	477.564	23.3327	23.0676	456.299	17.725	17.7006	440.798	108.415	104.872	456.314	18.1723	18.1468	-3.51641
4226A_65	85.5626	2.25575	0.661802	0.0511804	13.6208	0.529716	0.133077	0.0608769	0.00434213	515.716	31.5151	31.0336	456.711	18.0765	18.0513	634.887	157.367	149.923	457.022	18.8069	18.781	28.0642
4226A_46	61.8492	1.96439	0.568074	0.0605198	13.4727	0.493843	0.16652	0.0580552	0.00424705	456.768	39.5717	38.8154	461.556	17.3223	17.2976	531.846	164.377	156.322	457.843	25.3351	25.2854	13.2162
4226A_32	118.844	2.68178	0.612163	0.0599487	13.6976	0.458239	0.295854	0.0625816	0.00437504	484.923	38.1125	37.4107	454.237	15.7127	15.6936	694.042	152.641	145.604	458.529	21.4677	21.4334	34.552
4226A_40	246.382	2.51272	0.66152	0.0530259	13.1385	0.475062	0.27091	0.0605477	0.00385967	515.544	32.6662	32.1491	472.876	17.4949	17.4727	623.206	140.544	134.581	459.699	21.6057	21.5696	24.122
4226A_4	112.997	3.04581	0.598426	0.0608873	13.6519	0.440078	0.199172	0.0571029	0.00471687	476.235	39.0511	38.3143	455.704	15.2847	15.2666	495.509	187.416	177.039	459.787	17.0691	17.0465	8.033
4226A_60	789.543	5.23245	0.594385	0.036324	13.606	0.546349	0.538494	0.0574124	0.00250093	473.664	23.2657	23.0022	457.189	18.6516	18.6247	507.411	97.2673	94.3944	459.919	19.7201	19.6899	9.89758
4226A_55	49.2329	1.78843	0.588934	0.0923946	13.6825	0.658914	0.130743	0.056462	0.00718277	470.187	59.9188	58.2011	454.721	21.9022	21.8651	470.582	294.667	269.834	460.942	24.6505	24.6034	3.37068
4226A_5	151.18	1.62579	0.653718	0.0486324	13.6263	0.356002	0.25264	0.0593948	0.00322486	510.764	30.082	29.6429	456.532	12.8545	12.8403	581.596	120.156	115.782	461.018	14.649	14.6309	21.5036
4226A_8	297.989	2.75031	1.1265	0.072704	10.4469	0.322889	0.239012	0.0784907	0.00332653	766.083	35.0155	34.422	589.288	18.9065	18.8803	1159.32	85.2142	82.9158	461.915	37.3401	37.2323	49.1695
4226A_34	125.15	1.75266	0.626269	0.0734992	13.7902	0.381545	0.223315	0.0604639	0.00446762	493.769	46.4167	45.3794	451.29	13.2824	13.2702	620.218	163.574	155.553	462.384	15.5854	15.5666	27.2368
4226A_68	324.271	3.44424	0.545648	0.0421933	13.4437	0.389735	0.196109	0.0554494	0.00334202	442.141	27.9089	27.5307	462.517	14.1944	14.1774	430.387	137.216	131.593	463.374	14.7524	14.7341	-7.46518
4226A_104	182.314	2.75663	0.596436	0.0467914	13.6294	0.521105	0.337858	0.057507	0.00323361	474.969	29.981	29.5448	456.433	17.8465	17.8232	511.031	126.041	121.257	463.455	23.1434	23.1034	10.684
4226A_29	159.184	2.82369	0.651205	0.0610023	13.324	0.432102	0.366161	0.0582289	0.00371033	509.22	37.8632	37.1703	466.523	15.7028	15.6851	538.385	142.534	136.436	463.674	16.5389	16.5191	13.3476
4226A_64	169.157	1.63912	0.764848	0.0696312	12.8543	0.388245	0.159403	0.0689797	0.00513522	576.803	40.4619	39.6715	482.95	15.3016	15.2835	898.132	157.485	149.917	463.853	18.2628	18.2369	46.2274
4226A_52	94.128	1.94867	0.586967	0.0674898	13.5317	0.613467	0.155232	0.0562005	0.00554246	468.929	43.6475	42.7291	459.612	20.9294	20.8955	460.297	226.456	211.509	464.482	21.7988	21.762	0.14873
4226A_105	300.298	3.01951	0.59522	0.0404011	13.6554	0.380427	0.204357	0.058865	0.00309906	474.196	25.8801	25.5544	455.593	13.5918	13.5775	562.107	116.829	112.694	464.665	15.6472	15.6268	18.9491
4226A_84	46.3362	2.18488	0.728371	0.0867088	13.4704	0.462604	0.157476	0.0637142	0.00545491	555.597	51.5894	50.3112	461.63	16.3765	16.3572	732.157	186.78	176.327	466.631	21.0054	20.9712	36.9492
4226A_48	124.793	1.80838	0.585454	0.0642199	13.5138	0.490152	0.109506	0.0552744	0.00456173	467.961	41.5508	40.7179	460.202	17.1196	17.0968	423.338	189.639	179.068	466.87	20.7669	20.7335	-8.70774
4226A_9	170.953	2.67022	0.571247	0.0557672	13.4323	0.543436	0.165339	0.0572873	0.00497757	458.821	36.362	35.7223	462.895	18.9861	18.9596	502.609	197.197	185.737	468.799	20.7879	20.7544	7.90161
4226A_63	253.827	2.27082	0.614048	0.052794	13.4887	0.328107	0.176212	0.0587662	0.0042238	486.11	33.4868	32.9435	461.025	12.2727	12.2624	558.447	160.686	152.969	469.48	14.5038	14.4875	17.4451
4226A_87	157.295	2.82797	0.65935	0.0612972	13.2114	0.428467	0.362012	0.0583687	0.00371705	514.216	37.8596	37.1666	470.357	15.8494	15.8299	543.627	142.32	136.238	470.106	16.5195	16.4984	13.478
4226A_44	123.371	1.80191	0.606519	0.0569026	13.5384	0.594533	0.305042	0.0605413	0.00445722	481.363	36.287	35.6499	459.394	20.3179	20.2875	622.978	162.893	154.936	474.204	26.6358	26.5809	26.2584
4226A_72	300.59	1.43906	0.612287	0.0512022	13.184	0.385992	0.178755	0.0564462	0.00383765	485.001	32.5049	31.9927	471.301	14.5827	14.5648	469.963	154.135	147.058	475.227	15.5701	15.5527	-0.284554
4226A_71	97.3397	2.17878	0.565823	0.0649245	13.241	0.417022	0.0919203	0.0572748	0.00572145	455.31	42.5438	41.6709	469.345	15.4269	15.4071	502.128	227.807	212.649	475.412	17.3751	17.3517	6.52879
4226A_75	85.8412	1.76394	0.664184	0.0614841	13.3487	0.367262	0.225498	0.0623404	0.00411753	517.17	37.8648	37.1714	465.692	13.6793	13.6634	685.807	144.216	137.921	477.562	18.2968	18.2709	32.0958
4226A_43	99.4668	2.53616	0.603699	0.0681997	12.5823	0.463593	0.239082	0.0503723	0.00501109	479.578	43.6465	42.7281	493	18.5482	18.5216	212.208	239.042	222.699	479.197	22.4495	22.4104	-132.319
4226A_50	205.117	0.97892	0.725727	0.0588256	12.8911	0.568921	0.41207	0.0658255	0.00406632	554.042	34.9103	34.3202	481.621	21.3709	21.3341	800.832	132.158	126.817	480.51	26.7584	26.7044	39.8599
4226A_30	143.405	1.52466	0.561395	0.054278	12.9265	0.50087	0.126495	0.0519536	0.00420995	452.434	35.6077	34.9941	480.349	18.9047	18.8756	283.368	190.855	180.245	481.195	21.2565	21.2216	-69.5141
4226A_3	22.989	2.79027	0.818815	0.140107	11.5733	0.626407	0.16328	0.0574101	0.00833163	607.387	79.7628	76.7482	534.244	28.545	28.4819	507.32	336.201	304.182	532.145	30.6578	30.585	-5.30712
4226A_91	107.327	6.78949	0.895833	0.102033	11.789	0.422423	0.249365	0.0635741	0.00487572	649.498	55.3963	53.9253	524.859	19.2598	19.2324	727.494	166.922	158.526	536.016	22.7722	22.7306	27.8538
4226A_53	68.7666	12.2553	1.28258	0.12179	10.0174	0.472447	0.134622	0.0826256	0.00706859	838	54.9131	53.4673	613.389	28.643	28.581	1260.39	171.93	162.773	654.644	52.7483	52.5347	51.3333
4226A_106	75.359	2.17384	1.33609	0.133201	8.32252	0.348334	0.232125	0.0729845	0.00525554	861.532	58.7372	57.0862	731.461	30.3945	30.3229	1013.52	149.48	142.601	734.061	37.4559	37.3474	27.8298
4226A_42	101.24	3.43313	1.46544	0.15656	7.96865	0.213536	0.235992	0.0791491	0.00424798	916.253	65.5244	63.4762	762.096	21.4793	21.4435	1175.87	108.052	104.38	777.571	29.3501	29.2834	35.1886
4226A_47	102.338	3.41905	1.46577	0.157084	7.93047	0.212503	0.236878	0.0789159	0.00424061	916.389	65.7383	63.6769	765.556	21.5156	21.4784	1170.03	108.279	104.593	791.106	29.7068	29.6399	34.5694
4226A_70	275.79	4.31185	1.57669	0.109092	6.74329	0.238259	0.37241	0.0753201	0.00370039	961.065	43.4509	42.5407	891.402	31.4909	31.4127	1077.06	100.226	97.0755	895.251	32.6722	32.5897	17.2371
4226A_20	61.7686	3.60709	1.55594	0.154233	6.69246	0.262401	0.338594	0.0743594	0.00512838	952.856	62.2147	60.3653	897.722	34.6277	34.535	1051.24	142.194	135.943	900.087	38.8415	38.7248	14.6034
4226A_62	282.435	4.41608	1.59183	0.110183	6.66532	0.235504	0.368104	0.0751007	0.00368562	967.014	43.6309	42.7133	901.133	31.7139	31.6347	1071.2	100.205	97.056	906.966	32.0787	32.0005	15.8761
4226A_82	262.575	3.31724	1.58638	0.103514	6.87421	0.25936	0.372233	0.0779707	0.00417533	964.878	41.0507	40.237	875.527	32.7778	32.6961	1146.13	108.281	104.599	912.309	45.3946	45.2341	23.61
4226A_28	401.932	6.51424	1.53446	0.116689	6.64871	0.203058	0.368663	0.0720799	0.00416623	944.287	47.2956	46.2191	903.234	27.9956	27.9363	988.197	119.877	115.419	912.673	29.2408	29.1759	8.59786
4226A_2	398.305	6.48307	1.5535	0.116698	6.5972	0.201487	0.367393	0.0723074	0.00417392	951.884	46.9427	45.8822	909.811	28.2292	28.1675	994.604	119.599	115.16	916.086	28.9139	28.8492	8.52533
4226A_74	306.02	3.62182	1.98558	0.127637	5.33241	0.213084	0.506206	0.0756265	0.00352666	1110.62	43.8796	42.9513	1107.99	42.9079	42.7668	1085.2	94.9378	92.105	1099.3	44.8605	44.7051	-2.10035
4226A_31	124.283	5.02132	2.90467	0.222649	4.31597	0.177928	0.320817	0.0865262	0.00467031	1383.13	58.7399	57.0884	1343.39	52.4805	52.2676	1349.96	105.986	102.417	1367.04	55.3716	55.136	0.48705
4226A_86	130.142	1.87666	3.06754	0.199712	4.15847	0.145902	0.383972	0.0973383	0.00497276	1424.62	50.4764	49.2519	1389.15	46.9617	46.7901	1573.74	97.2057	94.1615	1407.43	52.4817	52.2689	11.7289
4226A_96	133.212	1.36869	2.8543	0.21921	4.00617	0.142077	0.226128	0.0911099	0.00505286	1369.94	58.5861	56.943	1436.49	48.8878	48.7043	1448.9	107.464	103.779	1445.91	49.6693	49.4776	0.856649
4226A_10	86.7652	3.52705	3.87879	0.318576	3.84853	0.161907	0.455662	0.0954357	0.00483404	1609.28	67.4094	65.2433	1489.02	58.6715	58.4057	1536.69	96.8407	93.8243	1506.76	61.1878	60.8989	3.10187
4226A_94	176.58	3.39457	4.86296	0.361924	3.22614	0.105678	0.247817	0.112115	0.00561377	1795.86	63.6679	61.7324	1740.55	54.0859	53.8613	1833.98	92.1324	89.3592	1795.23	95.0525	92.1088	5.09449
4226A_23	93.1151	0.340368	11.2826	0.777206	2.27925	0.0821768	0.556999	0.183213	0.0076234	2546.77	65.2886	63.2548	2345	75.5897	75.1506	2682.17	69.6566	68.0016	2585.95	89.3922	86.6943	12.5708
19091407 (422-07) random, Loch Mask Formation																						#DIV/0!
4227A_109	224.934	2.60101	1.29631	0.0997868	6.99114	0.215805	0.420931	0.0699621	0.00368965	844.089	44.6102	43.6513	861.82	27.1872	27.1299	927.24	110.233	106.465	864.46	27.6569	27.5977	7.05537
4227A_45	23.5025	3.9562	1.36135	0.22023	6.62479	0.171948	0.16969	0.076265	0.00619863	872.453	96.9781	92.5573	906.277	24.7201	24.6714	1102.03	166.98	158.401	891.742	32.3224	32.2402	17.7633
4227A_2	23.7351	3.96433	1.38905	0.223748	6.64218	0.172311	0.171609	0.0761243	0.00617972	884.291	97.3954	92.9374	904.062	24.5947	24.5493	1098.34	166.866	158.3	892.842	33.1983	33.1117	17.6884
4227A_65	274.164	0.513302	1.44858	0.111222	6.72479	0.217224	0.353181	0.0731719	0.00394545	909.285	46.6535	45.6059	893.692	29.3003	29.2339	1018.72	111.161	107.31	898.345	29.9746	29.9038	12.273
4227A_3	12.9426	2.4242	1.76444	0.552108	6.66182	0.253652	0.125798	0.0724473	0.00951561	1032.48	213.645	193.293	901.575	33.9504	33.8613	998.534	278.943	255.919	902.467	38.409	38.2949	9.71012
4227A_99	277.187	0.513057	1.40863	0.111248	6.67163	0.215513	0.348979	0.0731664	0.00397715	892.58	47.448	46.3647	900.338	29.4429	29.3758	1018.57	112.081	108.168	906.055	30.1436	30.0719	11.6073
4227A_61	139.126	2.72601	1.44654	0.112664	6.5323	0.233136	0.271672	0.0704919	0.003568	908.438	47.3055	46.2286	918.235	32.7469	32.6639	942.717	105.465	102.008	920.881	35.0926	34.9973	2.59689
4227A_24	26.2529	0.558496	1.73566	0.204019	6.62069	0.220405	0.0845431	0.0769839	0.00636708	1021.85	77.1729	74.3473	906.8	30.3904	30.3175	1120.77	169.518	160.675	925.805	34.0379	33.9495	19.0914
4227A_51	143.476	2.1462	1.52417	0.145991	6.51238	0.183922	0.266331	0.0743643	0.0046436	940.155	59.5929	57.894	920.853	26.935	26.8789	1051.37	128.459	123.335	935.213	30.2246	30.1538	12.414
4227A_104	299.602	1.88635	1.5268	0.109253	6.41335	0.152445	0.364473	0.074315	0.00304782	941.212	44.3844	43.4349	934.089	23.7783	23.7359	1050.04	83.784	81.574	945.929	25.7013	25.6501	11.0421
4227A_95	98.1699	1.36291	1.67956	0.158103	6.32127	0.272393	0.31224	0.0729175	0.00480617	1000.82	60.8122	59.044	946.744	39.7789	39.6566	1011.66	136.581	130.816	946.667	41.7043	41.5699	6.41682
4227A_68	38.4669	1.59441	1.43255	0.203748	6.22917	0.214948	0.144403	0.0713121	0.00879539	902.614	86.88	83.3152	959.749	33.1086	33.0226	966.372	262.526	242.068	949.84	35.5642	35.4662	0.685347
4227A_48	480.139	4.15903	1.67554	0.111931	6.35133	0.167073	0.371372	0.0740897	0.00298957	999.291	42.9289	42.0404	942.575	26.0447	25.9921	1043.91	82.491	80.3488	960.967	28.0045	27.9437	9.70739
4227A_110	65.8981	3.4118	1.65398	0.166539	6.23663	0.162708	0.220744	0.0764506	0.00412617	991.074	64.7371	62.737	958.683	26.1256	26.0741	1106.9	109.79	106.014	961.816	31.5478	31.4708	13.39
4227A_40	151.039	2.75842	1.59407	0.121181	6.26693	0.164362	0.210059	0.0738226	0.00352025	967.892	47.9962	46.8879	954.375	26.2401	26.1867	1036.62	97.833	94.8352	961.927	27.2468	27.1879	7.93407
4227A_52	86.8054	2.98613	1.49995	0.141434	6.06241	0.176339	0.235191	0.0749213	0.00469285	930.367	58.273	56.6473	984.231	29.3355	29.2702	1066.39	128.57	123.434	967.1	32.6346	32.5521	7.7046
4227A_42	478.551	4.14578	1.65212	0.111752	6.34729	0.166967	0.369983	0.074028	0.00300243	990.362	43.242	42.3405	943.133	25.9586	25.9077	1042.23	82.9419	80.7767	967.696	28.3199	28.2565	9.50816
4227A_5	119.303	3.35504	1.63375	0.13447	6.1681	0.132828	0.24482	0.0745994	0.00429083	983.307	52.5148	51.191	968.572	22.8405	22.7988	1057.73	118.016	113.676	967.837	23.2048	23.1631	8.42912
4227A_18	76.0596	3.2822	1.60846	0.151976	6.11799	0.198268	0.247969	0.0700412	0.00436428	973.507	60.0379	58.3138	975.933	31.8137	31.7368	929.56	130.618	125.36	967.971	35.4733	35.3761	-4.98874
4227A_76	147.137	3.52243	1.5704	0.112855	6.16059	0.155563	0.260794	0.0707521	0.00366987	958.583	45.0776	44.0988	969.668	25.8863	25.8358	950.26	107.996	104.373	969.759	27.7331	27.6748	-2.04229
4227A_19	60.2621	1.77851	1.71354	0.178801	6.22417	0.147916	0.13807	0.0766431	0.00575651	1013.61	68.0328	65.8274	960.466	24.4028	24.3581	1111.92	153.755	146.448	973.199	29.6957	29.6275	13.6208
4227A_34	145.536	3.52428	1.55874	0.112945	6.13691	0.154967	0.255702	0.0705841	0.00367137	953.967	45.3218	44.3321	973.141	25.8604	25.8087	945.392	108.385	104.736	973.413	27.7372	27.6789	-2.93519
4227A_73	115.985	3.3612	1.59946	0.133931	6.16637	0.132799	0.242704	0.0746595	0.00431114	969.997	53.0012	51.6531	968.824	22.927	22.8877	1059.35	118.459	114.087	974.427	24.3222	24.2764	8.54545
4227A_101	60.8462	1.77739	1.66759	0.176687	6.18401	0.146994	0.134942	0.0766684	0.00578255	996.268	68.3924	66.1638	966.258	24.4724	24.4259	1112.58	154.4	147.033	980.051	28.6626	28.5989	13.1514
4227A_106	247.844	3.84445	1.62131	0.0999603	6.05875	0.127533	0.317219	0.0718532	0.0034216	978.5	39.0942	38.3557	984.784	22.8689	22.8285	981.786	98.522	95.4915	982.685	23.0932	23.0506	-0.305331
4227A_47	163.541	4.14446	1.66749	0.125562	6.05069	0.147305	0.374934	0.0741062	0.00305829	996.232	48.3666	47.2413	986	25.4745	25.4242	1044.36	84.3888	82.148	985.813	25.466	25.4157	5.58822
4227A_4	347.286	4.06464	1.73409	0.114462	6.0264	0.12748	0.299876	0.073978	0.00317346	1021.27	42.9599	42.0699	989.684	23.0523	23.0125	1040.87	87.8123	85.3891	990.433	23.3811	23.3374	4.91736
4227A_92	197.795	4.40075	1.65715	0.108385	6.07188	0.151273	0.336575	0.0731467	0.00316746	992.286	41.8457	41.001	982.809	25.8084	25.7556	1018.02	88.9641	86.481	990.529	26.4986	26.4456	3.45877
4227A_98	343.489	4.06635	1.69609	0.115059	6.02867	0.127531	0.2991	0.0740606	0.00319922	1007.06	43.8017	42.8771	989.338	23.1368	23.0953	1043.12	88.4051	85.9492	991.032	23.4501	23.4076	5.1559
4227A_6	196.858	4.4035	1.70819	0.107237	6.11059	0.152233	0.3425	0.0730906	0.00312571	1011.61	40.6099	39.8136	977.03	25.739	25.6876	1016.47	87.8642	85.4417	991.171	26.7852	26.7297	3.87957
4227A_81	140.801	3.13881	1.49376	0.109446	5.98574	0.152651	0.375722	0.071486	0.0033766	927.849	45.0595	44.0809	995.912	26.5939	26.5392	971.342	97.8711	94.8816	991.699	28.488	28.4264	-2.52946
4227A_85	165.342	4.1423	1.61993	0.12558	6.0247	0.146676	0.372331	0.0742407	0.00310126	977.963	49.2628	48.096	989.942	25.5143	25.464	1048.02	85.386	83.0921	992.218	25.5383	25.4879	5.5414
4227A_83	248.985	3.84868	1.57425	0.101387	6.03194	0.126971	0.316593	0.0720046	0.00345936	960.104	40.3901	39.6025	988.841	22.9008	22.8602	986.069	99.3481	96.2668	992.672	23.3122	23.2715	-0.281065
4227A_27	159.732	4.14624	1.77956	0.120291	5.98597	0.126142	0.270474	0.0759191	0.00343551	1038.02	44.4253	43.474	995.878	23.1462	23.1048	1092.94	91.9787	89.3152	993.133	26.3611	26.3074	8.88076
4227A_60	85.4768	2.29935	1.75865	0.189956	5.98843	0.166156	0.133965	0.0729128	0.00480289	1030.35	71.15	68.7411	995.497	28.5423	28.4807	1011.53	136.498	130.74	995.503	30.2504	30.1797	1.58492
4227A_8	157.991	4.14823	1.7497	0.121425	5.9796	0.126008	0.264505	0.0759312	0.00345821	1027.05	45.3411	44.3511	996.861	23.2245	23.184	1093.26	92.5763	89.8791	999.61	26.5259	26.4714	8.81742
4227A_62	63.5232	2.33942	1.62356	0.162729	6.07379	0.1672	0.180269	0.0791729	0.00488788	979.368	63.9777	62.0235	982.521	28.0101	27.9494	1176.46	124.614	119.754	1001.54	34.988	34.8921	16.4851
4227A_43	629.522	3.15548	1.6901	0.0810354	5.86688	0.16908	0.566128	0.0741823	0.00257788	1004.8	30.8197	30.3589	1014.58	29.9912	29.9215	1046.43	70.8831	69.2951	1003.74	33.0269	32.9439	3.04377
4227A_72	241.494	2.47296	1.58121	0.106879	5.99005	0.115399	0.297885	0.0730229	0.00328214	962.845	42.4847	41.6142	995.249	21.8503	21.8133	1014.59	92.441	89.7633	1005.61	23.0045	22.9637	1.9062
4227A_67	239.831	2.46061	1.56682	0.106843	5.96962	0.115005	0.291131	0.0728774	0.00329064	957.17	42.7114	41.8311	998.404	21.7617	21.7264	1010.55	92.9294	90.2243	1006.29	22.5438	22.5057	1.20155
4227A_44	200.037	3.55045	1.71946	0.126177	5.91794	0.198678	0.280973	0.0733407	0.00445456	1015.82	47.6666	46.5732	1006.48	33.8103	33.722	1023.38	125.413	120.532	1008.04	33.8352	33.7466	1.65197
4227A_107	145.37	5.0257	1.56344	0.147614	5.85887	0.149061	0.238061	0.0729295	0.00450776	955.83	59.3284	57.6444	1015.86	27.0576	27.0022	1011.99	127.896	122.827	1008.29	27.864	27.8026	-0.382413
4227A_93	631.181	3.14939	1.64046	0.0843184	5.82119	0.167763	0.566786	0.0742047	0.00262859	985.89	32.6861	32.1684	1021.95	30.1147	30.0444	1047.04	72.2653	70.6158	1017.12	34.8456	34.7529	2.39675
4227A_28	68.9251	1.45652	1.71285	0.160295	5.7918	0.121984	0.176669	0.0685779	0.00488099	1013.35	60.9004	59.1271	1026.74	23.7656	23.7232	886.07	150.684	143.746	1017.72	25.0614	25.0127	-15.8755
4227A_36	86.6766	0.675031	1.94411	0.181562	5.83114	0.202777	0.276748	0.0745918	0.00539997	1096.42	63.6039	61.672	1020.33	35.2741	35.178	1057.52	149.288	142.41	1019.72	38.3118	38.197	3.51689
4227A_12	603.437	3.84931	1.75553	0.101803	5.82066	0.158291	0.50598	0.0736806	0.00273227	1029.2	37.864	37.171	1022.03	28.768	28.7041	1032.73	75.8566	74.0419	1022.59	28.7788	28.7146	1.03618
4227A_41	185.648	2.30251	1.8976	0.131425	5.87012	0.231624	0.547405	0.0778262	0.00348756	1080.25	46.5845	45.54	1014.06	39.2281	39.109	1142.44	90.3997	87.8197	1023.45	44.4344	44.2832	11.2371
4227A_54	89.6161	3.21559	1.62919	0.18584	5.79893	0.174821	0.206762	0.0737492	0.00606346	981.548	73.0694	70.5313	1025.57	31.396	31.3209	1034.61	170.709	161.786	1024.4	31.8539	31.7752	0.873949
4227A_59	284.827	2.23912	1.74597	0.117471	5.85175	0.15518	0.377554	0.0753771	0.00329444	1025.67	43.9087	42.9795	1017.01	28.1288	28.0676	1078.58	88.9823	86.4897	1026.16	29.9478	29.8797	5.70818
4227A_49	22.0164	0.842465	2.18214	0.323651	5.85434	0.217537	0.0760661	0.0920203	0.00987633	1175.36	105.992	100.733	1016.59	37.2219	37.1147	1467.81	210.984	197.218	1028.18	45.4918	45.332	30.7407
4227A_56	48.2169	1.54252	1.72014	0.21076	5.85489	0.19745	0.240386	0.0757354	0.00521383	1016.08	80.2378	77.1876	1016.5	34.2264	34.1357	1088.09	141.139	134.965	1030.05	38.32	38.2065	6.57871
4227A_9	216.005	52.3165	1.94659	0.156478	5.8564	0.104198	0.110164	0.0811511	0.00383777	1097.27	54.6505	53.2182	1016.26	21.0045	20.9704	1225.11	94.3276	91.5093	1030.7	23.5412	23.4994	17.047
4227A_55	385.647	4.44534	1.70007	0.111319	5.76043	0.134761	0.349539	0.0772719	0.00325736	1008.56	42.3	41.4368	1031.9	25.8984	25.8466	1128.22	85.1438	82.8529	1034.99	25.9268	25.8733	8.53657
4227A_87	126.598	2.63207	1.92764	0.18189	5.78166	0.18221	0.269168	0.0801093	0.00440904	1090.72	64.0848	62.1241	1028.4	32.5762	32.4953	1199.68	110.468	106.627	1036.94	37.4628	37.3554	14.2767
4227A_31	65.7419	2.39834	2.15065	0.272225	5.65573	0.179248	0.118231	0.0783071	0.00716723	1165.26	89.6835	85.8897	1049.53	33.4109	33.3245	1154.67	187.203	176.458	1051.31	34.9635	34.8689	9.10568
4227A_82	68.9628	1.62792	1.7823	0.197518	5.64448	0.146401	0.154261	0.0712949	0.0045779	1039.02	73.3931	70.8328	1051.46	28.3124	28.2491	965.88	133.925	128.391	1054.87	30.1391	30.0673	-8.86074
4227A_7	300.148	3.86138	1.95705	0.118857	5.53568	0.136301	0.286751	0.0788108	0.00331667	1100.87	41.2287	40.408	1070.51	27.7345	27.6747	1167.39	84.5079	82.2452	1063.88	30.3058	30.2348	8.29905
4227A_78	523.748	4.17244	1.76986	0.112785	5.61636	0.197127	0.425424	0.0767544	0.00331503	1034.47	41.7715	40.9297	1056.32	36.8032	36.6984	1114.82	87.4398	85.0268	1064.35	38.0928	37.9821	5.24732
4227A_46	163.792	3.07042	1.83252	0.134953	5.53557	0.157071	0.189353	0.0768397	0.00396233	1057.18	48.9628	47.8101	1070.52	31.0874	31.0128	1117.03	104.654	101.216	1072.71	31.5687	31.4916	4.16371
4227A_16	359.181	6.02073	1.96777	0.118962	5.59042	0.147074	0.353145	0.0791012	0.00323499	1104.55	41.1146	40.2986	1060.84	28.9912	28.9261	1174.67	82.0036	79.8711	1073.23	30.1822	30.1118	9.6904
4227A_77	132.839	3.73531	1.83169	0.141952	5.51818	0.184913	0.238694	0.0779766	0.00414643	1056.89	51.5497	50.2735	1073.63	35.8497	35.7502	1146.28	107.507	103.876	1076.72	35.9081	35.8072	6.33764
4227A_97	418.243	8.53095	1.90598	0.128103	5.41381	0.136309	0.277753	0.0785962	0.00350876	1083.18	45.2614	44.2747	1092.67	28.7416	28.6764	1161.98	89.7933	87.2443	1078.49	31.0726	30.9964	5.96514
4227A_10	227.702	5.01506	1.88357	0.115924	5.49182	0.113861	0.254527	0.0761204	0.0034571	1075.32	41.2358	40.4153	1078.38	24.5894	24.5424	1098.24	92.2434	89.5645	1080.26	24.6161	24.569	1.80853
4227A_66	205.504	4.80843	1.8103	0.132993	5.47174	0.117274	0.27347	0.0760561	0.00338699	1049.19	48.629	47.4918	1082.02	25.3801	25.3301	1096.55	90.4455	87.8689	1080.99	26.3634	26.3108	1.32489
4227A_80	164.603	3.51428	1.89948	0.151091	5.53239	0.139572	0.183002	0.0797789	0.00462336	1080.91	53.613	52.2338	1071.09	28.3592	28.2971	1191.53	116.569	112.302	1081.66	30.3552	30.2837	10.1079
4227A_1	78.1785	3.44655	2.19092	0.226287	5.48968	0.117728	0.163736	0.0828547	0.00370748	1178.16	73.3141	70.7595	1078.77	25.1311	25.0807	1265.79	88.6548	86.1556	1086.55	32.1869	32.1068	14.7756
4227A_94	93.0167	3.06906	1.83044	0.224313	5.53752	0.188681	0.166106	0.0816112	0.00607732	1056.43	82.1072	78.9162	1070.18	36.1299	36.0292	1236.2	149.63	142.655	1089.63	39.8285	39.706	13.4302
4227A_29	453.558	3.57981	1.90918	0.115513	5.3978	0.115686	0.404761	0.0776693	0.00298472	1084.3	40.7228	39.9223	1095.65	25.6459	25.5964	1138.43	77.4052	75.5057	1096.28	25.6449	25.5937	3.75747
4227A_84	548.544	3.48437	2.01494	0.106675	5.55468	0.105793	0.453259	0.0797138	0.00251219	1120.56	36.2481	35.6123	1067.13	23.1512	23.1085	1189.91	62.8573	61.5958	1096.45	24.9972	24.9474	10.3188
4227A_70	186.08	3.75334	1.96117	0.146979	5.43629	0.167335	0.4983	0.0800389	0.00367324	1102.28	51.035	49.7837	1088.51	33.8054	33.7168	1197.95	91.8596	89.1883	1097.25	35.8043	35.7036	9.13513
4227A_14	554.309	3.48881	2.05711	0.103831	5.54381	0.105586	0.448812	0.0796668	0.00248027	1134.66	34.7823	34.1966	1069.06	23.0791	23.0378	1188.75	62.0981	60.8666	1098.39	24.6079	24.5609	10.0689
4227A_74	448.613	3.58151	1.87685	0.11733	5.39534	0.115634	0.398512	0.0776951	0.00301107	1072.95	41.8394	40.9949	1096.11	25.7247	25.6721	1139.09	78.0632	76.1321	1099.18	25.7384	25.6884	3.77285
4227A_88	103.278	2.52294	1.8645	0.183507	5.49891	0.151515	0.210508	0.0785423	0.00421732	1068.58	66.1126	64.0278	1077.1	30.4001	30.3285	1160.62	108.346	104.656	1107.13	32.7901	32.7071	7.1969
4227A_37	398.667	4.45947	2.30377	0.166522	5.07526	0.151931	0.41887	0.0812262	0.00370735	1213.45	51.835	50.5446	1159.37	34.9853	34.8893	1226.92	90.9649	88.3405	1160.66	36.6094	36.5055	5.50605
4227A_103	167.603	6.74686	2.0378	0.167348	5.0638	0.150448	0.26901	0.0822033	0.00522718	1128.22	56.7208	55.1797	1161.77	34.7071	34.6152	1250.37	127.05	121.982	1161.11	35.1651	35.0693	7.08561
4227A_57	92.4868	2.9967	2.24171	0.217456	5.16706	0.15852	0.236776	0.0848867	0.0042599	1194.19	69.2812	66.9954	1140.49	35.1383	35.0443	1312.95	98.9339	95.8238	1192.47	43.4826	43.3364	13.1356
4227A_63	42.4684	1.33862	2.54138	0.265913	4.78757	0.142771	0.220107	0.0855091	0.00504413	1283.97	77.7107	74.8462	1222.82	36.5544	36.4525	1327.11	116.396	112.111	1226.18	39.1008	38.9815	7.85866
4227A_89	665.804	6.1694	2.53916	0.124911	4.50437	0.138614	0.569679	0.0870755	0.00304684	1283.33	36.1569	35.5242	1292.47	39.4307	39.3105	1362.17	68.1691	66.6741	1293.39	40.0773	39.9517	5.11663
4227A_13	362.79	3.07667	2.5963	0.138815	4.7279	0.103701	0.460812	0.0896707	0.00284464	1299.6	39.576	38.8197	1236.86	29.0664	28.9996	1418.53	61.2577	60.0438	1307.87	33.2567	33.1696	12.8067
4227A_25	90.4355	3.58667	2.89269	0.219444	4.40102	0.0927052	0.212494	0.0888122	0.00441505	1380.01	58.0627	56.4489	1319.91	29.9152	29.8447	1400.11	96.7983	93.8054	1324.04	29.9549	29.8856	5.72811
4227A_105	155.426	2.84754	2.92316	0.226913	4.41346	0.089028	0.19962	0.0880179	0.00425159	1387.92	59.5951	57.8963	1316.55	28.8985	28.8339	1382.88	94.2386	91.402	1326.63	31.8227	31.7458	4.79631
4227A_79	351.173	2.96957	2.54319	0.141838	4.73724	0.103907	0.469692	0.0897238	0.00287946	1284.49	41.0593	40.2455	1234.64	29.1348	29.0705	1419.66	61.9687	60.7268	1327.97	34.7583	34.6646	13.0324
4227A_102	235.757	2.75438	3.14127	0.187612	4.25206	0.105473	0.289645	0.096538	0.00407844	1442.86	46.529	45.4869	1361.59	34.6982	34.605	1558.27	80.3228	78.2348	1401.69	41.9231	41.7859	12.6213
4227A_71	109.358	3.46507	3.03384	0.261501	4.13828	0.125756	0.218987	0.0965235	0.0050831	1416.17	66.9143	64.7798	1395.25	41.8954	41.7598	1557.98	100.462	97.2158	1406.39	43.2054	43.0622	10.4451
4227A_75	860.355	1.5181	3.27477	0.174275	4.131	0.164609	0.514718	0.101322	0.00429431	1475.08	41.8231	40.9792	1397.46	53.1384	52.9201	1648.48	79.6374	77.5753	1413.39	65.2707	64.9408	15.2275
4227A_53	340.6	3.70513	3.29034	0.231996	4.10649	0.112449	0.258217	0.0975351	0.00444533	1478.77	55.6616	54.1768	1404.95	38.7427	38.6278	1577.52	86.5249	84.1045	1417.26	41.3576	41.2267	10.9389
4227A_15	343.969	2.76454	3.24263	0.1732	4.1158	0.122712	0.457709	0.0938707	0.00348009	1467.41	41.8807	41.0341	1402.1	41.3609	41.2286	1505.51	70.8678	69.2416	1418.76	46.6237	46.4555	6.86902
4227A_32	50.4528	1.96925	3.79447	0.562098	3.97181	0.0980898	0.21241	0.0903541	0.00608388	1591.58	122.674	115.684	1447.62	36.5583	36.4538	1433.02	131.264	125.811	1421.67	37.287	37.1784	-1.01855
4227A_50	79.3616	1.18293	3.12757	0.296208	4.04404	0.164859	0.249239	0.0957177	0.00631076	1439.5	74.2068	71.5904	1424.42	55.0469	54.8117	1542.24	126.578	121.472	1427.75	55.131	54.8949	7.63923
4227A_69	179.497	1.89806	2.96693	0.214141	4.02598	0.141655	0.409614	0.0917158	0.00433168	1399.19	55.5652	54.0855	1430.15	48.5528	48.3695	1461.51	91.1173	88.4526	1436.54	49.3171	49.1304	2.14546
4227A_17	212.235	1.97187	3.41411	0.194372	3.97176	0.126383	0.267206	0.092201	0.00459889	1507.65	45.2112	44.2265	1447.64	44.935	44.7802	1471.53	96.1797	93.2137	1440.83	47.5322	47.3577	1.62368
4227A_39	300.026	4.07164	3.43642	0.213643	3.95652	0.123559	0.423181	0.0934071	0.00376923	1512.77	49.4958	48.3179	1452.63	44.4409	44.2883	1496.15	77.3147	75.384	1452.46	44.4348	44.2809	2.90906
4227A_38	108.215	3.64504	3.29342	0.309712	3.93557	0.113611	0.294709	0.0950354	0.00527714	1479.5	74.5996	71.9564	1459.55	41.7568	41.6221	1528.78	106.441	102.81	1459.92	42.4048	42.2659	4.5282
4227A_86	228.835	3.10221	3.12398	0.174573	3.96218	0.0908797	0.266914	0.0935634	0.00372614	1438.61	43.4435	42.5341	1450.77	34.5861	34.4926	1499.32	76.2581	74.3787	1462.38	38.766	38.6497	3.23774
4227A_33	85.176	1.27155	3.6115	0.263269	4.00587	0.103991	0.231625	0.100727	0.00526712	1552.07	58.8111	57.1559	1436.59	37.7842	37.6738	1637.54	98.7044	95.5576	1466.85	42.8371	42.6938	12.2719
4227A_90	142.449	2.15133	3.20563	0.205909	4.03606	0.0861939	0.403306	0.100868	0.00367438	1458.52	50.3322	49.1146	1426.95	32.315	32.2341	1640.14	68.3931	66.8672	1467.3	39.1489	39.0303	12.9987
4227A_21	302.801	3.79445	3.28859	0.210668	3.84708	0.0950976	0.42415	0.0972318	0.00351978	1478.36	50.5014	49.276	1489.52	37.6031	37.4952	1571.69	68.5718	67.043	1486.68	38.0567	37.9449	5.22801
4227A_30	30.7317	1.42259	4.2153	0.541681	3.44254	0.0902628	0.200527	0.101523	0.00598594	1677	108.299	102.814	1643.94	42.8536	42.7118	1652.15	111.32	107.331	1610.88	128.961	123.648	0.496928
4227A_20	235.046	2.25227	3.65883	0.248499	3.83257	0.092288	0.406857	0.101467	0.00368693	1562.44	54.895	53.4501	1494.56	36.9505	36.846	1651.13	68.1231	66.6078	1611.55	72.0344	70.3459	9.48274
4227A_35	449.176	1.2581	3.75708	0.208963	3.71747	0.135751	0.548384	0.101519	0.00429126	1583.63	45.0996	44.1198	1535.72	53.4326	53.2131	1652.07	79.3875	77.338	1627.54	80.8197	78.6987	7.04233
4227A_58	135.187	2.08371	3.66495	0.24811	3.79892	0.115692	0.411173	0.101315	0.00454301	1563.77	54.7353	53.2985	1506.36	44.937	44.7811	1648.35	84.323	82.0145	1628	87.6654	85.1753	8.61385
4227A_11	64.9342	1.41632	4.1297	0.370491	3.71605	0.105807	0.268574	0.103103	0.00628197	1660.2	74.6926	72.0428	1536.25	43.103	42.9592	1680.71	114.684	110.449	1652.81	117.17	112.759	8.59546
4227A_108	185.84	2.08866	3.88921	0.262367	3.57329	0.11566	0.487235	0.102695	0.00429389	1611.44	55.2323	53.7696	1590.63	49.5218	49.3323	1673.38	78.3	76.3029	1656.38	80.0094	77.9272	4.94548
4227A_96	171.656	1.65976	3.61356	0.236009	3.70187	0.0713031	0.240256	0.104031	0.0041809	1552.52	52.6181	51.2891	1541.48	32.4778	32.3952	1697.25	74.9921	73.156	1666.73	79.7553	77.6851	9.17778
4227A_23	173.798	1.6544	3.68201	0.233039	3.70186	0.0713033	0.251604	0.103982	0.00414231	1567.47	51.1781	49.9201	1541.49	32.3723	32.2901	1696.39	74.3346	72.5305	1676.34	75.5559	73.6946	9.13123
4227A_22	151.702	3.56984	4.1322	0.340542	3.53878	0.0843633	0.418572	0.105744	0.00443884	1660.69	68.5179	66.2812	1604.36	39.0307	38.9131	1727.29	78.0743	76.0834	1681.93	82.7378	80.5105	7.11709
4227A_64	152.585	1.24665	4.07134	0.254506	3.40826	0.09513	0.320604	0.105373	0.00445353	1648.58	51.6075	50.3284	1658.52	45.5839	45.422	1720.83	78.6805	76.66	1705.15	80.0286	77.9406	3.62064
4227A_100	111.743	3.61163	3.83269	0.261389	3.75147	0.0953777	0.365909	0.10691	0.00471736	1599.64	55.6758	54.1902	1523.33	39.0592	38.9398	1747.39	81.9163	79.7257	1709.59	96.8912	93.8468	12.8225
4227A_26	93.8797	1.38373	4.19074	0.283044	3.53393	0.0866575	0.257937	0.108795	0.00539842	1672.21	56.1365	54.6262	1606.31	39.9069	39.7839	1779.33	91.9089	89.1558	1728.64	99.1381	95.9501	9.72415
4227A_91	298.454	11.4132	5.66025	0.331418	2.84949	0.0891623	0.389755	0.124573	0.00543354	1925.33	51.1653	49.9077	1939.09	57.1951	56.9427	2022.73	78.3105	76.2806	2004.81	79.6732	77.5748	4.13506
19091408 (422-08) random, Kilbride Formation
4228A_20	144.852	1.66836	0.490399	0.0537321	15.0975	0.288226	0.0413581	0.0607335	0.00577992	405.182	36.9406	36.2808	413.439	9.31959	9.31139	629.81	211.936	198.656	417.345	9.99152	9.98233	34.3549
4228A_96	144.461	1.81431	0.595548	0.0545296	13.5455	0.220632	0.112354	0.0587445	0.00362602	474.404	35.0018	34.4087	459.161	9.42414	9.41581	557.642	137.519	131.827	466.901	12.7108	12.6983	17.6603
4228A_55	39.5549	1.5689	1.16733	0.175943	10.2598	0.439486	0.0458653	0.0734406	0.00787644	785.395	84.1477	80.7993	599.554	25.6929	25.6405	1026.14	224.897	209.667	605.119	29.9771	29.9062	41.5717
4228A_7	71.6011	1.77681	1.56466	0.17802	6.85406	0.172421	0.10523	0.074103	0.00576829	956.315	71.7323	69.2851	877.933	23.3818	23.3395	1044.27	161.145	153.166	889.211	25.7971	25.7444	15.9287
4228A_57	70.8211	1.77778	1.58182	0.18027	6.79482	0.17094	0.102817	0.0733821	0.00573681	963.084	72.1643	69.6876	885.086	23.5439	23.4995	1024.52	162.35	154.262	891.279	25.872	25.8216	13.61
4228A_40	37.2949	2.1596	1.78695	0.258433	6.66588	0.165438	0.0695029	0.073167	0.00567423	1040.72	96.4086	92.0385	901.063	23.6957	23.6523	1018.58	161.164	153.194	907.163	26.7944	26.7388	11.5374
4228A_76	37.0669	2.16221	1.79835	0.259036	6.61656	0.164135	0.0688877	0.071986	0.00560316	1044.86	96.236	91.8812	907.328	23.872	23.8265	985.546	162.602	154.507	908.293	26.296	26.2439	7.93653
4228A_11	52.3278	3.41819	1.65095	0.158386	6.57261	0.139905	0.144798	0.0784997	0.00434724	989.914	61.5904	59.7775	912.985	21.3815	21.3447	1159.55	111.824	107.899	914.344	26.7271	26.6731	21.2638
4228A_84	52.1369	3.42687	1.66818	0.160494	6.5194	0.138777	0.140097	0.0777	0.00434	996.494	62.0136	60.1759	919.929	21.5226	21.4867	1139.36	113.135	109.123	916.341	26.1363	26.0834	19.2594
4228A_66	144.683	2.66227	1.49673	0.0984972	6.53746	0.0991331	0.166731	0.0707018	0.00298947	929.057	40.4575	39.6673	917.56	17.5387	17.5149	948.805	87.7718	85.3632	918.508	19.581	19.5526	3.29304
4228A_61	149.075	2.65543	1.50846	0.106648	6.52539	0.0989549	0.159689	0.0714218	0.00322318	933.816	43.6347	42.7171	919.142	17.3636	17.3415	969.511	93.4681	90.7386	926.33	19.5892	19.5609	5.19533
4228A_2	288.085	2.02801	1.48058	0.0899809	7.29974	0.118787	0.316942	0.0807498	0.00328281	922.469	37.1703	36.5019	827.626	16.628	16.6051	1215.36	81.0269	78.9399	926.89	23.4248	23.3824	31.9029
4228A_38	48.0726	2.00915	2.08577	0.22781	6.42129	0.130624	0.0842738	0.0952347	0.00636281	1144.13	76.3802	73.6115	933.015	21.1259	21.0914	1532.72	128.469	123.216	929.234	29.2404	29.1742	39.1268
4228A_1	90.6889	1.14414	1.53713	0.121557	6.41981	0.0950983	0.140228	0.0764795	0.00362159	945.354	49.2404	48.0747	933.214	17.315	17.2932	1107.65	96.1049	93.1989	930.927	18.9877	18.9611	15.7483
4228A_65	291.271	2.02713	1.50091	0.0998844	7.27491	0.118381	0.307086	0.0815205	0.00356071	930.755	40.9641	40.1541	830.276	16.4913	16.4715	1234.02	86.9058	84.5065	932.383	23.3942	23.3505	32.7178
4228A_32	89.7059	1.14489	1.55535	0.123088	6.35993	0.0942827	0.135873	0.0757749	0.00362742	952.622	49.5084	48.3299	941.389	17.434	17.4105	1089.13	97.442	94.4586	932.621	19.0534	19.0238	13.565
4228A_106	63.6806	2.25728	1.51851	0.142269	6.43772	0.108631	0.0829059	0.0732854	0.00530766	937.876	58.1839	56.5631	930.797	18.8615	18.834	1021.85	150.171	143.227	933.936	19.6273	19.5975	8.91095
4228A_16	107.093	1.15519	1.56386	0.0957385	6.35619	0.117201	0.170973	0.0704266	0.00313337	955.996	38.2744	37.5664	941.905	19.9769	19.9445	940.816	92.5405	89.8682	940.133	21.378	21.3427	-0.115751
4228A_75	46.6918	0.890877	1.37475	0.174324	6.32036	0.100553	0.0850326	0.0695548	0.00575969	878.197	75.9389	73.2013	946.87	18.3388	18.3127	915.238	175.204	165.879	944.165	19.0511	19.023	-3.45621
4228A_69	60.5534	1.29735	1.54005	0.14427	6.36147	0.135515	0.12246	0.0771814	0.00528783	946.524	58.5065	56.8683	941.178	22.0584	22.0221	1125.88	139.648	133.589	946.832	23.6289	23.5857	16.4053
4228A_8	117.881	1.28049	1.48356	0.129557	6.37375	0.110214	0.12543	0.0708078	0.00493854	923.686	53.6714	52.2894	939.491	19.1248	19.0964	951.869	146.064	139.511	949.729	19.5567	19.5271	1.3004
4228A_25	107.374	1.14975	1.61383	0.156936	6.25719	0.104426	0.109561	0.0724551	0.00463383	975.596	61.898	60.067	955.756	18.989	18.9597	998.752	132.701	127.256	956.854	19.3719	19.3428	4.30499
4228A_87	1091.26	5.31053	1.64671	0.0860384	6.06137	0.118501	0.246333	0.0726659	0.00268621	988.291	33.2788	32.7424	984.388	21.903	21.8671	1004.65	75.9418	74.1264	983.058	22.0966	22.0573	2.01678
4228A_67	430.577	2.40626	1.7757	0.0986112	6.03956	0.0866296	0.198121	0.0759474	0.00277271	1036.61	36.3972	35.7564	987.683	18.1002	18.0748	1093.68	73.9831	72.2502	991.325	18.5373	18.5108	9.69209
4228A_14	161.766	3.61182	1.71007	0.14138	6.03578	0.104711	0.126845	0.074656	0.00399433	1012.31	53.6741	52.2915	988.257	20.1016	20.0717	1059.25	109.605	105.851	991.477	20.5694	20.5341	6.70258
4228A_64	1212.09	4.24875	1.64422	0.0928167	6.00394	0.0797889	0.176293	0.0732394	0.00279669	987.336	35.9584	35.3323	993.115	17.5479	17.5254	1020.59	78.2864	76.3571	991.836	17.6187	17.5934	2.6917
4228A_77	140.466	4.59438	1.60317	0.134212	5.99277	0.113418	0.134721	0.0696685	0.00383005	971.449	53.037	51.6868	994.829	21.4467	21.411	918.6	115.153	111.049	993.841	22.14	22.1008	-8.29846
4228A_81	50.9076	3.46759	1.80427	0.197541	6.07133	0.129008	0.178154	0.0785825	0.00388236	1047.01	72.8165	70.2959	982.891	22.9788	22.9379	1161.64	99.5328	96.4102	995.335	25.6553	25.6044	15.3877
4228A_48	126.534	2.69528	1.75787	0.125679	5.92704	0.0707883	0.108971	0.0738026	0.00348774	1030.06	46.8071	45.7527	1005.05	16.6595	16.6393	1036.08	96.9497	94.0052	995.755	18.7053	18.6781	2.99495
4228A_60	754.939	4.9481	1.75788	0.0965707	5.99244	0.0832917	0.289456	0.0760771	0.00258497	1030.07	35.8698	35.2473	994.881	17.9295	17.9047	1097.1	68.7632	67.2639	995.795	17.9469	17.9205	9.31716
4228A_21	73.8439	4.42203	1.67256	0.161964	5.94746	0.125569	0.142833	0.07063	0.00394659	998.16	62.4861	60.6207	1001.85	23.1789	23.1385	946.725	116.562	112.353	996.452	24.3869	24.3396	-5.8226
4228A_3	239.124	4.41312	1.76048	0.118524	5.97573	0.0986445	0.160054	0.0744416	0.00321755	1031.03	44.071	43.135	997.458	19.6681	19.6382	1053.46	88.3182	85.8659	1003.96	20.4374	20.405	5.31647
4228A_34	80.3807	2.49362	1.63063	0.182315	5.9303	0.162462	0.289918	0.0744036	0.00430079	982.102	71.6189	69.1788	1004.53	28.3692	28.3057	1052.43	118.708	114.319	1004.55	28.8187	28.7544	4.55154
4228A_6	43.4515	3.34574	1.77515	0.207818	5.97209	0.131272	0.142929	0.0761253	0.00513891	1036.41	77.4974	74.6481	998.021	23.7636	23.72	1098.37	138.121	132.2	1006.2	25.3908	25.3408	9.13606
4228A_26	632.429	5.20444	1.68312	0.088064	5.94053	0.0724705	0.249495	0.0763419	0.00255406	1002.16	33.6029	33.0558	1002.93	16.9074	16.8852	1104.05	67.6232	66.1719	1006.24	17.0672	17.0433	9.15891
4228A_31	120.067	5.40002	1.58717	0.130814	5.80088	0.106134	0.138025	0.0684104	0.00418497	965.188	52.0005	50.7021	1025.25	21.4874	21.4516	881.013	129.174	124.044	1011.56	24.2258	24.1791	-16.372
4228A_74	79.4204	1.80793	2.00962	0.173268	5.91847	0.114263	0.171717	0.0814436	0.00405927	1118.76	59.315	57.6314	1006.39	21.9468	21.9095	1232.17	99.395	96.2698	1015.54	25.1369	25.0879	18.3235
4228A_37	227.829	3.12124	1.92276	0.150727	5.79378	0.0717354	0.145291	0.077209	0.0034189	1089.03	53.0504	51.6999	1026.41	17.5862	17.5633	1126.59	89.5235	86.9949	1017.07	17.9993	17.973	8.89221
4228A_9	323.627	2.53819	1.59621	0.106756	5.88051	0.0770063	0.184894	0.0727681	0.00297062	968.727	42.1875	41.329	1012.4	17.6138	17.5898	1007.5	83.9356	81.7228	1017.66	17.8281	17.8049	-0.486749
4228A_92	1495.95	5.07288	1.8368	0.0916402	5.84432	0.0784435	0.179276	0.0763469	0.00265047	1058.72	33.0689	32.539	1018.2	18.2275	18.2031	1104.18	70.1988	68.636	1019.13	18.3576	18.3315	7.78667
4228A_56	230.217	3.12865	1.92528	0.158245	5.78353	0.0716091	0.131348	0.0779955	0.00364176	1089.9	55.6844	54.1979	1028.1	17.3859	17.3639	1146.76	94.1899	91.3915	1022.38	17.693	17.67	10.3477
4228A_109	116.483	2.87556	1.68895	0.117183	5.88948	0.112779	0.203203	0.0717385	0.00338873	1004.37	44.7391	43.7746	1010.98	22.0786	22.0422	978.53	97.7683	94.7838	1023.32	24.7124	24.6652	-3.31584
4228A_18	1501.28	5.06569	1.80664	0.0958517	5.86593	0.0787333	0.185683	0.0774794	0.00277905	1047.86	34.9767	34.3842	1014.73	17.9703	17.9441	1133.56	72.2393	70.5828	1024.69	18.5505	18.5239	10.4825
4228A_62	85.862	1.08641	1.81267	0.163918	5.78111	0.106616	0.149256	0.0748977	0.00412491	1050.04	60.0545	58.3295	1028.49	21.6931	21.6554	1065.76	112.771	108.799	1034.3	22.9245	22.8828	3.49657
4228A_43	268.689	2.89595	1.68855	0.0981265	5.73438	0.0814443	0.25699	0.0743202	0.0025654	1004.22	37.4017	36.7252	1036.24	18.6681	18.641	1050.17	70.3639	68.7984	1038.21	20.544	20.5112	1.32721
4228A_101	391.452	5.74827	1.91722	0.105268	5.72416	0.189051	0.170812	0.0790907	0.00420515	1087.1	36.9748	36.3134	1037.95	34.3855	34.2938	1174.4	107.048	103.441	1044.64	35.7388	35.6402	11.6194
4228A_91	76.3363	2.00979	1.81437	0.151381	5.66336	0.112044	0.218654	0.0743201	0.00398402	1050.66	55.3642	53.8946	1048.23	23.2691	23.2283	1050.17	109.971	106.195	1047.77	29.4193	29.3523	0.185112
4228A_33	116.591	1.58567	1.7527	0.131381	5.62881	0.0934906	0.156363	0.0751949	0.00319303	1028.16	49.0499	47.8932	1054.16	20.7492	20.716	1073.72	86.4801	84.1243	1049.51	23.3809	23.3384	1.82106
4228A_45	447.402	5.72586	1.76477	0.0987326	5.65133	0.0802183	0.197168	0.0734451	0.00254354	1032.6	36.5879	35.9402	1050.29	18.9385	18.9122	1026.26	70.8557	69.2703	1050.01	19.9831	19.9523	-2.34122
4228A_46	61.547	0.951315	1.93484	0.163044	5.63237	0.102213	0.0999077	0.0778703	0.0042318	1093.21	57.2078	55.6399	1053.55	21.8612	21.8229	1143.57	109.957	106.163	1059.62	25.356	25.3064	7.87151
4228A_15	60.7004	2.35678	1.86886	0.171984	5.40685	0.0980616	0.0808992	0.0726429	0.00451347	1070.13	61.8016	59.9764	1093.96	22.6679	22.6292	1004.01	128.736	123.604	1066.59	31.8612	31.7814	-8.9598
4228A_29	77.5242	3.60733	1.80207	0.162584	5.54575	0.114362	0.162552	0.0721869	0.00411725	1046.21	59.7867	58.0767	1068.71	24.1957	24.149	991.213	118.207	113.869	1069.65	25.4837	25.4333	-7.81876
4228A_107	109.575	3.24553	1.84523	0.113446	5.55846	0.109545	0.145417	0.0765688	0.00333948	1061.73	40.8947	40.0874	1066.46	23.6522	23.6088	1109.98	88.3746	85.9111	1077.74	25.4868	25.4365	3.92087
4228A_51	52.2715	2.43	2.24702	0.248108	5.35447	0.141629	0.124027	0.0800276	0.00515821	1195.86	79.1073	76.1407	1103.8	30.0587	29.9889	1197.67	129.812	124.541	1089.07	33.2089	33.1236	7.83781
4228A_42	411.516	4.28917	1.83976	0.114812	5.42997	0.070816	0.206817	0.0758884	0.00294318	1059.78	41.4731	40.6426	1089.68	18.7465	18.7192	1092.13	78.6697	76.7136	1090.35	18.76	18.7329	0.224516
4228A_104	358.192	3.69469	1.85967	0.11463	5.36543	0.0997281	0.194133	0.0744066	0.0028561	1066.87	41.115	40.2993	1101.73	23.514	23.4723	1052.52	78.3188	76.3838	1095.74	24.9324	24.8842	-4.67536
4228A_93	245.491	2.36288	2.08421	0.118758	5.41571	0.154122	0.427252	0.0805367	0.00313168	1143.62	39.4787	38.726	1092.32	31.8032	31.726	1210.16	77.5149	75.603	1099.25	37.4607	37.3506	9.73796
4228A_12	131.869	6.23623	1.87488	0.125942	5.34449	0.101217	0.154568	0.075314	0.00353928	1072.25	44.9763	44.0016	1105.69	23.5902	23.5458	1076.89	95.8044	92.9213	1103.15	26.9502	26.8955	-2.67426
4228A_78	422.235	2.50794	2.00036	0.115724	5.3242	0.0931264	0.167841	0.0772118	0.00307818	1115.63	39.546	38.7906	1109.56	22.6143	22.5746	1126.66	80.4803	78.4309	1110.44	23.1218	23.0816	1.51784
4228A_82	405.267	3.63181	2.01152	0.1038	5.29963	0.071028	0.254566	0.0770947	0.00267536	1119.4	35.303	34.6996	1114.29	19.5323	19.5039	1123.64	69.9676	68.4132	1110.79	20.8942	20.8617	0.832472
4228A_30	411.809	3.62298	1.99237	0.10408	5.33194	0.0714611	0.253437	0.0779841	0.00266419	1112.92	35.6274	35.0131	1108.08	19.363	19.3341	1146.47	68.6357	67.1372	1112.8	20.4991	20.4679	3.34819
4228A_41	268.953	3.76214	2.12948	0.16157	5.2528	0.0988933	0.242904	0.0775754	0.00315619	1158.42	53.1112	51.7572	1123.4	23.806	23.7636	1136.02	82.0413	79.9112	1123.03	23.8114	23.7662	1.11054
4228A_94	273.744	3.03852	1.96913	0.127326	5.11093	0.146664	0.397528	0.0751607	0.00285102	1105.01	44.0165	43.0826	1151.96	33.6296	33.5436	1072.8	77.1465	75.2665	1132.78	35.545	35.4474	-7.37854
4228A_49	79.0712	2.59244	2.05444	0.217859	5.23001	0.0949975	0.165088	0.0788145	0.00469404	1133.77	73.7457	71.161	1127.89	23.3137	23.2732	1167.48	120.289	115.756	1143.4	24.3591	24.3144	3.39072
4228A_98	662.486	2.07307	2.1861	0.106898	4.90024	0.0849693	0.366182	0.078537	0.00248888	1176.62	34.3566	33.7849	1197.15	24.3139	24.2681	1160.49	63.4844	62.1998	1184.86	25.0293	24.9819	-3.15944
4228A_89	143.467	3.4482	2.25543	0.160447	4.88784	0.122796	0.152589	0.0832576	0.00427632	1198.48	50.6712	49.4376	1199.93	31.3668	31.2919	1275.26	101.844	98.5577	1201.43	32.1177	32.0393	5.90742
4228A_105	58.4814	0.924868	2.6093	0.297482	4.59949	0.0757284	0.184153	0.0831115	0.00445837	1303.26	85.4623	82.0104	1268.2	24.7176	24.6701	1271.84	106.499	102.911	1243.52	30.0868	30.018	0.285493
4228A_5	97.8067	1.50486	2.44452	0.172041	4.66375	0.0878506	0.18447	0.0854273	0.00385965	1255.81	51.3585	50.0917	1252.32	26.3206	26.2681	1325.26	88.7712	86.2574	1263.61	28.7433	28.6781	5.50346
4228A_90	261.261	3.34027	2.43674	0.141792	4.6209	0.160248	0.311619	0.0850657	0.00383889	1253.51	42.3307	41.4662	1262.87	42.8625	42.7204	1317.04	88.771	86.2583	1272.74	48.1166	47.9378	4.11295
4228A_36	94.7225	1.96395	2.66496	0.168548	4.55366	0.081808	0.200782	0.0900182	0.00414297	1318.8	47.2416	46.1676	1279.78	26.0292	25.9769	1425.91	89.1908	86.6405	1286.49	27.6571	27.5981	10.2485
4228A_58	206.554	2.32577	2.8862	0.184502	4.35759	0.0650928	0.218851	0.0887365	0.00341861	1378.31	48.7878	47.6434	1331.8	24.2354	24.19	1398.48	74.7622	72.9644	1338.95	24.3023	24.2554	4.76804
4228A_71	156.771	3.4801	3.08571	0.198813	4.10845	0.0513613	0.270637	0.0894263	0.00306054	1429.15	50.02	48.8175	1404.35	23.2779	23.2346	1413.31	66.1873	64.7738	1392.04	25.0322	24.9825	0.63355
4228A_13	124.918	2.75058	3.25998	0.23201	4.1565	0.0662488	0.131045	0.0994126	0.00442105	1471.56	56.0674	54.5608	1389.75	26.0726	26.0214	1613.12	84.0037	81.7159	1397.14	29.8426	29.7724	13.8471
4228A_110	167.658	4.02963	3.28789	0.237999	4.06878	0.045161	0.247727	0.091958	0.00305231	1478.19	57.1556	55.5907	1416.64	22.5538	22.5143	1466.52	63.7057	62.391	1416.03	22.6412	22.6014	3.40091
4228A_95	158.62	2.44581	2.95598	0.202364	4.05411	0.0884214	0.293031	0.0893747	0.00322821	1396.38	52.6167	51.2877	1421.24	32.9418	32.8579	1412.2	69.9072	68.3322	1416.59	35.639	35.5405	-0.640277
4228A_24	436.877	2.19257	3.00483	0.161779	4.2031	0.05492	0.43586	0.0987514	0.00294238	1408.85	41.4373	40.6088	1375.87	23.3014	23.2594	1600.67	56.1128	55.0834	1420.84	29.8615	29.7936	14.0441
4228A_52	165.725	4.06498	3.2946	0.2516	4.04121	0.044853	0.203054	0.0937108	0.00339975	1479.78	60.3748	58.6319	1425.32	22.3654	22.3268	1502.29	69.362	67.8039	1426.25	22.7483	22.7084	5.12403
4228A_108	98.9554	2.28261	3.36035	0.233868	4.05326	0.0732549	0.201222	0.0972702	0.0047279	1495.2	55.2039	53.7429	1421.51	29.0305	28.964	1572.43	92.4268	89.6704	1432.45	32.6254	32.5419	9.59751
4228A_35	256.098	2.42533	3.09911	0.190888	4.01409	0.065895	0.208394	0.0930335	0.00327628	1432.47	47.8436	46.7422	1433.95	27.3382	27.279	1488.57	67.4321	65.9592	1435.01	27.9107	27.849	3.6693
4228A_80	258.226	1.89489	3.137	0.18409	3.96842	0.0597777	0.217959	0.0913774	0.00316781	1441.81	45.6934	44.6876	1448.73	26.3639	26.3101	1454.48	66.6769	65.2391	1435.81	27.8886	27.826	0.395605
4228A_22	113.483	3.24556	3.04428	0.274778	4.00257	0.0548379	0.145739	0.0983589	0.00507697	1418.8	70.1865	67.8419	1437.65	24.7076	24.6606	1593.24	97.9771	94.8824	1442.41	26.2334	26.1801	9.76587
4228A_79	113.844	2.03826	3.15947	0.239761	4.00857	0.0926266	0.105067	0.0938609	0.00408824	1447.32	59.3889	57.7015	1435.72	34.5019	34.4087	1505.32	83.4355	81.1903	1447.69	34.8306	34.7366	4.62341
4228A_39	109.167	2.1758	3.15317	0.214752	3.99639	0.0862442	0.224101	0.0948248	0.00357432	1445.78	53.1942	51.8361	1439.64	32.8381	32.7532	1524.6	71.8843	70.2103	1447.79	34.2674	34.1767	5.5723
4228A_63	156.452	2.42186	3.15396	0.208882	3.98028	0.0539143	0.188334	0.0954721	0.00369653	1445.97	51.7113	50.4272	1444.86	24.7722	24.7262	1537.4	73.736	71.9743	1451.03	25.6584	25.6077	6.01962
4228A_102	312.986	2.8157	3.57014	0.234602	4.00026	0.096196	0.377829	0.0963903	0.00386974	1542.92	52.8039	51.4657	1438.39	35.8513	35.7518	1555.39	76.3076	74.4209	1451.13	37.635	37.5266	7.52222
4228A_99	105.506	3.21039	3.79923	0.390776	3.90618	0.104874	0.326164	0.0925242	0.00445713	1592.58	84.4076	81.0387	1469.37	39.7034	39.5814	1478.17	92.7545	89.9925	1467.99	39.6652	39.5423	0.5954
4228A_100	75.2027	2.76832	3.61884	0.288599	3.89401	0.0736626	0.206999	0.0930545	0.00443717	1553.68	64.4563	62.4734	1473.47	30.8344	30.7595	1489	91.6639	88.9637	1471.4	30.8014	30.7278	1.04251
4228A_27	93.631	1.28127	2.82972	0.227386	3.8818	0.0565517	0.184487	0.0959687	0.00468264	1363.45	61.2005	59.4099	1477.61	26.137	26.0828	1547.16	93.1008	90.3082	1479.39	26.7285	26.673	4.49507
4228A_4	77.063	2.381	3.17256	0.241149	3.88086	0.0678946	0.141648	0.0929646	0.00441829	1450.51	59.5474	57.8511	1477.93	29.1043	29.0387	1487.17	91.3801	88.6966	1480.45	31.2321	31.1564	0.620845
4228A_44	128.127	3.002	3.31664	0.233341	3.83604	0.048203	0.145722	0.0960255	0.00381046	1484.97	55.6432	54.159	1493.35	24.4386	24.3926	1548.27	75.4847	73.638	1490.49	24.9286	24.8818	3.54738
4228A_88	142.212	3.52082	3.77367	0.238729	3.6302	0.0701106	0.208088	0.0947851	0.00401364	1587.16	51.4246	50.1545	1568.49	33.0318	32.9473	1523.81	80.8817	78.7686	1511.96	82.0025	79.832	-2.93246
4228A_83	268.959	2.86556	3.95165	0.211268	3.74192	0.0582583	0.256968	0.10823	0.00396837	1624.33	43.7915	42.8668	1526.79	28.2667	28.2038	1769.84	67.7199	66.214	1574.59	87.6777	85.1932	13.7328
4228A_10	154.233	6.06962	3.64161	0.310863	3.82764	0.0580483	0.218807	0.0999588	0.00399687	1558.67	69.1677	66.8896	1496.27	27.0858	27.0291	1623.32	75.3217	73.4764	1590.95	79.9848	77.9107	7.82608
4228A_50	256.488	1.31164	3.71392	0.219586	3.60469	0.0445393	0.171629	0.100238	0.00394623	1574.37	47.8585	46.7568	1578.34	25.6048	25.5539	1628.51	74.0953	72.3088	1591.97	75.898	74.0276	3.08049
4228A_28	211.867	2.10713	3.71057	0.226513	3.71461	0.0387923	0.238669	0.100098	0.00321492	1573.65	49.4225	48.248	1536.78	23.3003	23.2571	1625.91	60.3309	59.141	1596.5	62.0501	60.7942	5.48216
4228A_19	168.606	1.56081	3.63013	0.271178	3.6932	0.0473748	0.178298	0.100927	0.00390619	1556.16	60.357	58.6149	1544.7	25.5607	25.5101	1641.22	72.7078	70.9852	1607.33	78.3667	76.3729	5.88128
4228A_72	131.72	0.987897	3.68843	0.252477	3.53671	0.0617098	0.194413	0.0982167	0.00437893	1568.87	55.4289	53.9564	1605.19	31.4338	31.3586	1590.54	84.4691	82.1591	1612.36	88.2111	85.6921	-0.921008
4228A_85	95.6703	1.51913	4.35302	0.35058	3.4432	0.0618929	0.177952	0.100786	0.00408932	1703.47	67.6126	65.4339	1643.66	32.8202	32.7369	1638.63	76.2933	74.3997	1617.35	83.1043	80.8643	-0.307024
4228A_59	138.315	1.81858	3.80078	0.26137	3.60492	0.0552713	0.207263	0.101429	0.00506123	1592.91	56.0472	54.5418	1578.25	28.606	28.5417	1650.44	93.9609	91.103	1629.32	94.5672	91.676	4.37393
4228A_70	209.624	1.80031	3.8283	0.238297	3.60782	0.050158	0.248574	0.100649	0.0034166	1598.71	50.7419	49.5051	1577.12	27.2183	27.162	1636.1	63.7173	62.391	1632.24	66.3098	64.8749	3.60461
4228A_17	149.081	1.44465	4.12331	0.401721	3.50787	0.0554532	0.121013	0.103215	0.00480753	1658.93	81.2194	78.0955	1616.86	29.7212	29.653	1682.72	87.2511	84.7777	1655.49	92.3369	89.575	3.91384
4228A_103	138.411	1.67811	4.00635	0.245994	3.4733	0.0515268	0.219458	0.103228	0.00344168	1635.48	50.5153	49.2892	1631.08	29.2657	29.202	1682.96	62.1926	60.9257	1656.48	68.4653	66.9346	3.08267
4228A_23	444.904	3.32177	3.88683	0.209924	3.56653	0.0390088	0.207678	0.103693	0.00340067	1610.95	44.0932	43.1561	1593.3	24.5735	24.5268	1691.25	61.101	59.8772	1672.01	62.3238	61.052	5.79163
4228A_68	165.587	4.01889	4.12849	0.285773	3.4368	0.0464809	0.187295	0.105318	0.00436773	1659.96	57.3831	55.806	1646.37	27.8397	27.7799	1719.88	77.1944	75.2484	1684.09	81.065	78.9253	4.27443
4228A_86	188.194	3.08064	3.96136	0.261642	3.48876	0.0396409	0.233321	0.10411	0.00360313	1626.32	54.2657	52.8533	1624.69	25.6246	25.5737	1698.66	64.4548	63.0941	1684.23	65.8647	64.445	4.35438
4228A_47	190.394	3.0754	3.95589	0.274166	3.49257	0.0396853	0.224264	0.105162	0.00385993	1625.2	56.9641	55.4093	1623.12	25.2333	25.1841	1717.16	68.2425	66.7176	1687.77	70.5316	68.9061	5.47614
4228A_73	588.151	4.49886	4.38191	0.244762	3.3049	0.0485376	0.228121	0.108107	0.00370457	1708.93	46.7112	45.661	1704.1	30.1054	30.0353	1767.77	63.2589	61.9432	1756.14	65.4282	64.0226	3.60166
4228A_54	126.958	1.00201	4.84612	0.303233	3.09489	0.04759	0.296252	0.113121	0.00405951	1792.94	53.3621	51.9956	1804.92	32.2017	32.1227	1850.15	65.6106	64.1909	1829.3	66.2464	64.8009	2.44472
4228A_97	239.855	2.26231	5.65864	0.389542	2.93261	0.0435209	0.217585	0.115957	0.00435365	1925.08	60.2878	58.5493	1891.45	33.3288	33.244	1894.8	68.3082	66.7676	1878.16	68.7251	67.1671	0.176747
4228A_53	112.847	1.91159	5.66711	0.393197	2.89962	0.0414062	0.129671	0.122736	0.00474463	1926.37	60.7835	59.017	1910.07	32.4442	32.3629	1996.37	69.5122	67.91	1967.9	70.8776	69.2146	4.32304
